# Supplementary material for: Quantitative proteomics and systems analysis of cultured H9C2 cardiomyoblasts during differentiation over time supports a ‘function follows form’ model of differentiation
Source: Royal Society of Chemistry journal article supplement (doi:10.1039/c8mo00036k), 2018-05-17
Supplement: c8mo00036k1.zip [file c8mo00036k1.zip]

## Sheet: ANOVA + cluster analysis
T: Gene names	T: Protein names	C: Cluster	LFQ intensity ctrl rep 1	LFQ intensity ctrl rep 2	LFQ intensity ctrl rep 3	LFQ intensity D13 rep 1	LFQ intensity D13 rep 2	LFQ intensity D13 rep 3	LFQ intensity D8 rep 1	LFQ intensity D8 rep 2	LFQ intensity D8 rep 3	N: Peptides	N: Razor + unique peptides	N: Unique peptides	N: Sequence coverage [%]	N: Unique + razor sequence coverage [%]	N: Unique sequence coverage [%]	N: Mol. weight [kDa]	N: Q-value	N: Score	N: Intensity	N: MS/MS count	N: -Log Two-way ANOVA p value Timepoint	N: -Log Two-way ANOVA p value Differentiation	N: -Log Two-way ANOVA p value Interaction	T: Protein IDs	T: Majority protein IDs			p-value Two-way ANOVA p value Timepoint	p-value Two-way ANOVA p value Differentiation	p-value Two-way ANOVA p value Interaction
Golga5	Golgin subfamily A member 5	1	0.289431	-0.42304	0.118567	1.64963	1.03716	0.554103	-0.996266	-1.38042	-0.84917	31	31	31	54.2	54.2	54.2	82.405	0	110.33	1421100000	142	1.33533	0.0058334	7.1539e-05	G3V6Z7;Q3ZU82	G3V6Z7;Q3ZU82			0.046203	0.986658	0.999835
Eno2	Gamma-enolase	1	0.360094	-0.201521	-0.00740839	1.39166	1.16836	0.65478	-1.54542	-1.07407	-0.746467	20	14	14	71	52.5	52.5	47.14	0	323.31	8476900000	267	1.52417	0.0723716	0.00958448	P07323	P07323			0.0299109	0.846503	0.978173
Ddost	Dolichyl-diphosphooligosaccharide--protein glycosyltransferase 48 kDa subunit	1	-0.275344	0.109049	-0.493971	1.20911	0.96576	1.38766	-1.50293	-0.464985	-0.934353	15	15	15	48.3	48.3	48.3	48.895	0	273.11	5701100000	231	1.48678	0.359772	0.154162	Q641Y0;F1LM69	Q641Y0;F1LM69			0.0326002	0.436745	0.701194
Atp1a1	Sodium/potassium-transporting ATPase subunit alpha-1	1	-0.348418	-0.215805	-0.328271	1.55613	1.30354	0.846931	-1.21306	-0.542623	-1.05842	49	49	49	50.6	50.6	50.6	113.05	0	323.31	32510000000	1011	1.78678	0.647554	0.373125	P06685;P06686;Q64608;P06687;Q5PQV3;Q64541;A0A0G2JWS9;F1LRK1;G3V8S4;P54708-2;P09626;P54708	P06685			0.0163388	0.225137	0.423521
Acadsb	Short/branched chain specific acyl-CoA dehydrogenase, mitochondrial	1	-0.139167	-0.132438	0.0469463	1.45606	1.22329	0.756148	-1.53306	-0.752832	-0.924949	14	14	14	42	42	42	52.042	0	159.84	1738000000	136	1.67403	0.125871	0.0263042	A0A0A0MY00;P70584	A0A0A0MY00;P70584			0.0211821	0.748392	0.94123
Por	NADPH--cytochrome P450 reductase	1	-0.247808	-0.0342722	-0.225875	1.54487	1.10602	0.989017	-0.96562	-1.18178	-0.98455	26	26	26	49.7	49.7	49.7	76.962	0	158.92	3400400000	230	2.31772	0.547282	0.292112	P00388	P00388			0.00481149	0.283608	0.510373
Ctgf	Connective tissue growth factor	1	0.0624682	0.246925	-0.452383	1.27514	1.48969	0.58059	-0.954705	-0.888673	-1.35905	20	20	20	66.6	66.6	66.6	37.756	0	142.73	7421900000	311	1.46508	0.0649999	0.00784281	Q9R1E9;Q6IN11;Q9R2C0;Q9Z164	Q9R1E9;Q6IN11			0.0342705	0.860994	0.982103
Rab7a	Ras-related protein Rab-7a	1	-0.00275527	0.123067	-0.0222711	0.874242	0.699462	1.62417	-1.61529	-1.02933	-0.651301	15	15	15	76.8	76.8	76.8	23.504	0	280.07	9460900000	340	1.37652	0.0407042	0.00322978	P09527;A0A0G2K930	P09527;A0A0G2K930			0.0420223	0.910533	0.992591
Cdc42bpb	Serine/threonine-protein kinase MRCK beta	1	-0.482726	0.0981632	0.240655	1.34674	0.775053	1.25744	-1.32869	-1.19908	-0.707555	45	40	38	31.2	29.1	28.4	194.89	0	188.07	2679700000	178	1.58925	0.0724301	0.00959891	Q7TT49;A0A0G2KB58	Q7TT49;A0A0G2KB58			0.0257484	0.846389	0.97814
Gpx8	Glutathione peroxidase	1	0.255793	-0.54245	0.170078	0.658901	1.22591	1.43317	-1.43596	-0.882659	-0.882794	8	8	8	45.5	45.5	45.5	24.143	0	43.369	1617100000	55	1.41647	0.0503732	0.00484943	D3ZPW7	D3ZPW7			0.0383292	0.890485	0.988896
Lemd2		1	-0.178612	0.721328	0.540262	0.820593	0.663571	1.1052	-1.66342	-0.870551	-1.13837	4	4	4	14.4	14.4	14.4	36.243	0	11.364	138160000	15	1.43885	0.598557	0.333039	Q4KM57	Q4KM57			0.0364041	0.252025	0.464474
Il6st	Interleukin-6 receptor subunit beta	1	0.63105	0.408637	0.622185	0.727556	0.843701	0.502691	-1.40993	-1.81908	-0.50681	10	10	10	15.1	15.1	15.1	102.59	0	24.46	174570000	28	1.35887	0.873576	0.567572	H9BFG4;F1LPK1;Q7TQ89;P40190	H9BFG4;F1LPK1;Q7TQ89;P40190			0.0437653	0.13379	0.270662
Micu2		1	0.520507	0.254548	0.368343	0.510418	1.09263	1.02194	-1.12806	-0.951585	-1.68874	8	8	8	26.9	26.9	26.9	49.214	0	17.461	301690000	39	1.76358	0.820666	0.520879	F1LMJ8;Q99P63	F1LMJ8			0.0172353	0.151124	0.301385
Gpsm2		1	0.220903	0.129553	0.479738	0.800222	1.1599	0.839048	-1.17984	-0.666877	-1.78264	2	1	1	3.8	1.8	1.8	75.448	0.0038532	2.278	102800000	9	1.52681	0.48171	0.241542	D3ZCE5	D3ZCE5			0.0297297	0.32983	0.5734
Vps13c		1	0.26124	0.181393	0.538149	0.733295	1.15188	0.894315	-1.62584	-1.17597	-0.958454	36	36	35	12	12	11.8	418.62	0	112.9	2868300000	117	1.96642	0.822527	0.52251	D4A4K4	D4A4K4			0.0108039	0.150478	0.300255
Pgpep1	Pyroglutamyl-peptidase 1	1	-1.06907	-1.16274	-0.671217	1.36365	1.17087	1.08825	0.312959	-0.450675	-0.582022	7	7	7	54.5	54.5	54.5	22.913	0	85.209	553060000	58	1.64202	1.67095	1.31695	Q76IC5	Q76IC5			0.0228024	0.0213329	0.0482003
Gaa		1	-0.533217	-1.20762	-0.943187	1.23756	1.14384	1.39673	-0.0327445	-0.451168	-0.610186	25	25	3	34.6	34.6	6.5	106.2	0	318.57	7602000000	370	1.88714	1.8	1.44265	M0R544	M0R544			0.0129676	0.0158489	0.0360869
Hsdl2	Hydroxysteroid dehydrogenase-like protein 2	1	-0.726636	-1.43728	-0.669388	1.23888	0.909308	1.45396	-0.0109841	-0.0665298	-0.691327	7	7	7	22.7	22.7	22.7	58.343	0	52.057	241300000	26	1.49843	1.51676	1.16779	Q4V8F9	Q4V8F9			0.0317373	0.0304257	0.0679532
Glb1l		1	-1.12042	-0.947304	-0.749252	1.75702	0.557543	1.26224	-0.00471811	-0.446636	-0.308476	7	6	6	16.6	14.7	14.7	73.261	0	22.008	675440000	38	1.42478	1.4471	1.10085	B1WBS6	B1WBS6			0.0376028	0.0357191	0.0792775
Cisd1	CDGSH iron-sulfur domain-containing protein 1	1	-1.00619	-1.00172	-0.427794	1.59522	1.48831	0.605404	-0.371125	-0.713118	-0.168979	6	6	6	52.8	52.8	52.8	12.097	0	93.684	2312900000	102	1.3793	1.25289	0.916116	B0K020	B0K020			0.0417542	0.0558612	0.121306
Dnaja3		1	-1.09273	-1.17524	-0.569601	1.41205	1.61154	0.544166	-0.366432	-0.101925	-0.261833	8	8	8	23.3	23.3	23.3	52.399	0	20.897	486350000	47	1.42664	1.45677	1.11012	Q2UZS7;A0A0G2K5E4;G3V6I5;A1KXF7;Q2TVU3;A0A0G2K4Y1	Q2UZS7;A0A0G2K5E4;G3V6I5;A1KXF7;Q2TVU3;A0A0G2K4Y1			0.0374421	0.0349325	0.0776033
Phb2	Prohibitin-2	1	-1.06145	-1.52145	-0.603026	1.55552	1.10424	0.722168	-0.143306	-0.105185	0.0524806	17	17	17	60.9	60.9	60.9	33.168	0	266.13	7991100000	211	1.50709	1.65866	1.30502	A0A0G2KB63;Q5XIH7	A0A0G2KB63;Q5XIH7			0.0311107	0.0219452	0.0495427
Got2	Aspartate aminotransferase, mitochondrial	1	-1.38613	-0.700091	-0.914258	1.09691	1.56436	0.858329	-0.475145	-0.285405	0.241429	29	29	29	71.2	71.2	71.2	47.314	0	298.73	25926000000	684	1.51646	1.59773	1.24596	P00507	P00507			0.0304467	0.0252505	0.0567597
Hsd17b4	Peroxisomal multifunctional enzyme type 2;(3R)-hydroxyacyl-CoA dehydrogenase;Enoyl-CoA hydratase 2	1	-1.10604	-0.927106	-0.727312	0.950279	1.77286	0.994953	-0.375907	-0.435183	-0.146538	31	31	31	53.7	53.7	53.7	81.088	0	193.37	4563300000	267	1.74861	1.70767	1.35265	Q6IN39;P97852	Q6IN39;P97852			0.0178398	0.0196033	0.0443966
Gla		1	-1.03968	-1.02771	-0.688193	1.26537	1.69599	0.623151	-0.0317967	-0.71848	-0.0786625	12	12	12	37.1	37.1	37.1	47.573	0	73.513	1859400000	100	1.38329	1.38786	1.04418	D3ZJF9	D3ZJF9			0.0413723	0.0409393	0.0903275
Isca2		1	-1.11274	-0.582549	-0.668327	1.24621	1.841	0.608347	-0.339462	-0.663052	-0.329428	4	4	4	28.6	28.6	28.6	16.68	0	8.7877	183870000	21	1.35852	1.20533	0.871395	D4A4L5	D4A4L5			0.0438006	0.0623261	0.134464
Hk1	Hexokinase-1	1	-0.513257	-0.841054	-0.853649	1.07421	0.942022	1.77457	-0.157719	-0.899233	-0.52589	42	42	9	53.8	53.8	12	102.41	0	305.77	8019700000	464	1.54223	1.28108	0.942737	P05708	P05708			0.0286926	0.0523504	0.114094
Gas6	Growth arrest-specific protein 6	1	-0.419591	-0.838326	-0.555348	0.828349	1.44535	1.5346	-0.283135	-1.11774	-0.59416	11	11	11	19.9	19.9	19.9	74.637	0	106.66	276410000	58	1.54823	1.08605	0.760338	Q63772;Q6IRL1	Q63772;Q6IRL1			0.0282989	0.0820257	0.173645
Gpnmb	Transmembrane glycoprotein NMB	1	-0.0580054	-0.698481	-0.502492	1.29041	1.32794	1.22802	-0.97373	-0.993313	-0.620346	4	4	4	9.1	9.1	9.1	63.772	0	13.031	561760000	62	2.12051	1.15961	0.828632	Q9QZF6;Q6P7C7	Q9QZF6;Q6P7C7			0.00757687	0.0692453	0.148377
Slc25a12		1	-0.183542	-0.769028	-0.708446	1.10077	1.66789	1.08457	-0.968788	-0.70182	-0.521604	19	15	15	40	34.4	34.4	71.916	0	49.387	958660000	80	1.76909	1.16707	0.835591	F1LX07;A0A0G2K2J7	F1LX07;A0A0G2K2J7			0.0170181	0.068066	0.146019
Acp2	Lysosomal acid phosphatase	1	-0.327052	-0.577918	-1.21999	1.44381	1.60132	0.695845	-0.747341	-0.464678	-0.404002	8	8	8	18.9	18.9	18.9	48.404	0	15.198	927950000	63	1.38165	1.11616	0.788213	Q642D2;P20611	Q642D2;P20611			0.0415289	0.0765315	0.16285
P2rx4	P2X purinoceptor 4	1	0.195492	-0.147625	-0.338587	1.0955	1.295	1.06858	-0.509889	-1.40861	-1.24986	5	5	5	22.2	22.2	22.2	43.501	0	44.232	317790000	30	1.64819	0.163805	0.0418294	P51577	P51577			0.0224807	0.685796	0.908177
Myl1	Myosin light chain 1/3, skeletal muscle isoform	1	-0.0873703	-0.456196	-0.774752	1.06252	1.22747	1.53903	-0.875084	-1.01319	-0.622432	11	10	9	55.6	50.8	44.4	20.679	0	66.745	19567000000	147	1.90093	1.03991	0.717861	P02600;P02600-2	P02600;P02600-2			0.0125623	0.09122	0.191487
Gk	Glycerol kinase	1	-0.209277	-0.460615	-0.795145	1.12598	1.57924	1.10693	-0.459827	-1.20083	-0.686453	15	15	15	32.8	32.8	32.8	57.462	0	25.067	407380000	50	1.683	0.982279	0.665256	D3ZCI0;A0A0G2KA23;A0A0G2K785;Q63060;Q68FP7;D3Z8F7	D3ZCI0;A0A0G2KA23;A0A0G2K785;Q63060			0.0207491	0.104165	0.216144
Scp2	Non-specific lipid-transfer protein	1	-0.129763	-0.423873	-0.792195	0.879851	1.92721	0.886428	-0.696524	-0.989339	-0.661791	16	16	16	26.7	26.7	26.7	58.787	0	74.976	2575700000	132	1.34699	0.699375	0.416435	F1LQ55;P11915;A0A0G2KAC1;P11915-2;Q6QI48	F1LQ55;P11915;A0A0G2KAC1;P11915-2			0.044979	0.199814	0.383323
Abhd12	Monoacylglycerol lipase ABHD12	1	-0.105599	0.0582903	-1.124	0.957382	1.39067	1.30643	-0.888511	-0.569465	-1.0252	13	13	13	45.7	45.7	45.7	45.295	0	51.363	531260000	64	1.33188	0.596179	0.331116	Q6AYT7	Q6AYT7			0.0465715	0.253408	0.466535
Mlec	Malectin	1	-0.458119	0.00464306	-0.970312	1.67127	1.28702	0.757376	-0.932437	-0.553399	-0.806047	19	19	19	55.8	55.8	55.8	32.809	0	323.31	7364800000	226	1.37361	0.757012	0.465575	A0A0G2K121;Q5FVQ4	A0A0G2K121;Q5FVQ4			0.0423048	0.17498	0.342314
Vdac2	Voltage-dependent anion-selective channel protein 2	1	-0.520055	-0.463835	-1.25816	1.33914	1.48736	0.894311	-0.904588	-0.0197383	-0.554443	15	15	14	63.1	63.1	59.7	31.745	0	313.07	10444000000	382	1.36737	1.15864	0.827722	P81155	P81155			0.0429171	0.0694001	0.148689
Gbf1		1	-0.770466	-0.69829	-0.751301	1.82865	0.956862	1.00272	-0.724424	-0.0989276	-0.744821	48	48	48	38.2	38.2	38.2	205.33	0	303.68	4467300000	256	1.53872	1.284	0.9455	A0A0G2K3N1;F1M8X9	A0A0G2K3N1;F1M8X9			0.0289254	0.0519996	0.11337
Pcyox1	Prenylcysteine oxidase	1	-0.717291	-0.323791	-0.764539	1.64801	1.01546	1.24656	-0.732382	-0.59245	-0.779577	19	19	19	54.6	54.6	54.6	56.287	0	256.82	7688100000	328	2.0556	1.49102	1.14302	Q99ML5	Q99ML5			0.00879832	0.0322835	0.0719416
Man2a2	Alpha-mannosidase	1	-0.520557	-0.643948	-0.627725	1.31558	1.62601	0.909502	-0.68927	-0.293984	-1.07561	10	9	9	10.3	9.6	9.6	131.96	0	8.2394	163750000	15	1.71775	1.2043	0.870426	D4A4J3;A0A0G2JWG1	D4A4J3;A0A0G2JWG1			0.0191536	0.0624741	0.134764
Slc25a5	ADP/ATP translocase 2;ADP/ATP translocase 2, N-terminally processed	1	-0.947447	-0.523931	-0.852755	1.59452	1.49715	0.718463	-0.414134	-0.370785	-0.701083	21	21	12	62.8	62.8	28.5	32.901	0	323.31	37111000000	537	1.66148	1.43532	1.08956	Q09073	Q09073			0.0218032	0.0367012	0.0813654
Suclg1	Succinyl-CoA ligase [ADP/GDP-forming] subunit alpha, mitochondrial	1	-0.940812	-0.701093	-0.941477	1.26308	1.40975	1.06236	-0.295973	0.106776	-0.962604	10	10	10	40.8	40.8	40.8	37.559	0	283.46	8752000000	272	1.60335	1.50347	1.15499	A0A0H2UHE1;P13086;P70631	A0A0H2UHE1;P13086			0.0249259	0.0313711	0.0699858
Slc25a20	Mitochondrial carnitine/acylcarnitine carrier protein	1	-0.85523	-0.65145	-1.41106	1.0088	1.68137	0.764313	-0.117074	0.191722	-0.611393	14	14	1	54.5	54.5	2.7	33.154	0	43.285	2622900000	139	1.29944	1.38005	1.03673	P97521	P97521			0.0501834	0.0416821	0.0918904
Sardh	Sarcosine dehydrogenase, mitochondrial	1	-0.930579	-0.648816	-1.20361	0.795462	1.49882	1.33085	-0.532651	0.221042	-0.530517	26	26	26	35.4	35.4	35.4	101.41	0	139.67	1348200000	180	1.49887	1.49699	1.14876	F1LRY5;Q64380	F1LRY5;Q64380			0.0317052	0.0318427	0.070997
Pi4k2a	Phosphatidylinositol 4-kinase type 2-alpha	1	-0.98556	-0.272831	-1.28787	1.11088	1.36455	1.20381	-0.747013	0.0498371	-0.435801	13	13	13	31.6	31.6	31.6	54.304	0	28.298	493910000	55	1.4242	1.33636	0.995132	Q99M64	Q99M64			0.037653	0.0460935	0.101127
Cpped1	Serine/threonine-protein phosphatase CPPED1	1	-0.152547	-0.699584	-1.46226	1.03225	1.41224	1.24834	-0.431635	-0.692811	-0.25399	7	7	7	24.7	24.7	24.7	35.26	0	14.434	297740000	30	1.3319	1.1632	0.831976	Q66H71	Q66H71			0.0465693	0.0686752	0.147239
Lpcat3	Lysophospholipid acyltransferase 5	1	-0.697299	-0.484167	-1.04859	1.12064	1.65063	1.01329	-0.463637	-0.971287	-0.119579	8	8	8	18.3	18.3	18.3	56.017	0	77.647	429300000	69	1.53127	1.28271	0.944273	Q5FVN0	Q5FVN0			0.0294259	0.0521543	0.113691
Tmem120a	Transmembrane protein 120A	1	-0.540395	-0.209597	-1.20615	1.11045	1.36011	1.37458	-0.807281	-0.539262	-0.54246	3	3	3	12.2	12.2	12.2	40.657	0	12.119	109950000	12	1.68019	1.2651	0.927639	Q5HZE2	Q5HZE2			0.0208838	0.0543125	0.11813
Lnpep	Leucyl-cystinyl aminopeptidase	1	-0.522963	-0.672265	-1.01578	1.26664	1.37258	1.27603	-0.766612	-0.691189	-0.246438	25	25	14	30.5	30.5	18.3	117.2	0	186.19	2725500000	233	2.15518	1.8141	1.45643	P97629;A0A0G2JUW8;A0A0G2JYN3;A0A0H2UHK5	P97629;A0A0G2JUW8;A0A0G2JYN3;A0A0H2UHK5			0.00699552	0.0153426	0.0349599
Mme	Neprilysin	1	-0.775258	-0.435727	-1.29512	1.2678	1.44159	1.11219	-0.546017	-0.297738	-0.471717	35	35	35	50.3	50.3	50.3	85.794	0	323.31	5239600000	361	1.85839	1.69316	1.33854	P07861;A0A0H2UHX5	P07861;A0A0H2UHX5			0.0138551	0.0202694	0.0458627
Nceh1	Neutral cholesterol ester hydrolase 1	1	-0.563921	-0.774963	-1.06372	1.1153	1.28662	1.487	-0.362183	-0.366533	-0.757596	10	10	10	36.3	36.3	36.3	45.821	0	52.261	597340000	65	2.14281	1.90228	1.54274	B2GV54	B2GV54			0.00719764	0.0125233	0.0286589
S100g	Protein S100-G	1	-0.701744	-0.9314	-1.22609	1.09935	1.27271	1.41552	-0.383662	-0.340014	-0.204665	3	3	3	39.2	39.2	39.2	9.0381	0	9.1075	229070000	12	2.38467	2.34508	1.97923	P02634	P02634			0.00412411	0.00451773	0.0104899
Tcp11l1		1	-1.01645	-0.730393	-1.01185	0.763867	1.58463	1.4048	-0.252953	-0.335433	-0.406221	6	6	6	17.1	17.1	17.1	56.066	0	15.614	141470000	23	1.89284	1.83791	1.4797	F1M9Y7;A0A0G2K6F1	F1M9Y7;A0A0G2K6F1			0.0127985	0.0145241	0.033136
Pgam5	Serine/threonine-protein phosphatase PGAM5, mitochondrial	1	-0.917186	-0.160891	-1.00216	0.942023	1.17372	1.6713	-0.429135	-0.451867	-0.825805	13	13	13	42.4	42.4	42.4	32	0	204.19	2526800000	126	1.4952	1.18207	0.849613	G3V9N1;Q562B5	G3V9N1;Q562B5			0.0319742	0.0657552	0.14138
Nqo1	NAD(P)H dehydrogenase [quinone] 1	1	-0.569448	-1.02621	-0.911747	1.22289	0.878477	1.62774	-0.723277	-0.586312	0.0878793	15	15	15	63.1	63.1	63.1	30.946	0	218.22	8762200000	269	1.52375	1.40253	1.05819	P05982	P05982			0.0299399	0.0395795	0.0874601
Atp6v1h		1	-0.756571	-0.933477	-0.714947	1.2946	0.905712	1.59999	-0.568757	-0.815594	-0.0109595	22	22	22	55.5	55.5	55.5	55.868	0	166.35	2537600000	160	1.67778	1.48728	1.13942	A0A0G2K9J2;Q5XIL1;E9PTI1	A0A0G2K9J2;Q5XIL1;E9PTI1			0.021	0.0325627	0.0725404
Cnp	2,3-cyclic-nucleotide 3-phosphodiesterase	1	-0.524835	-1.15052	-1.03152	1.64063	0.682004	1.34674	-0.493801	-0.313872	-0.154829	10	10	10	31	31	31	44.856	0	112.82	319290000	37	1.5328	1.49509	1.14693	A0A097BVJ5;P13233	A0A097BVJ5;P13233			0.0293224	0.0319823	0.0712968
		1	-0.469223	-0.948225	-0.944096	1.20924	0.898615	1.67208	-0.857167	-0.406196	-0.155028	16	16	16	12.3	12.3	12.3	181.91	0	24.704	342620000	33	1.57978	1.38405	1.04054	A0A0G2JV05;Q566Q7	A0A0G2JV05			0.026316	0.0413	0.0910878
Noc4l	Nucleolar complex protein 4 homolog	1	-0.876751	-1.35333	-0.246264	1.16912	1.11557	1.35726	-0.696877	-0.615264	0.146539	6	6	6	19.2	19.2	19.2	58.862	0	8.8173	61709000	12	1.30344	1.20976	0.875548	Q5I0I8	Q5I0I8			0.0497233	0.0616936	0.133184
Slc25a13		1	-0.595452	-1.28765	-0.713408	0.816973	1.57413	1.35367	-0.584748	-0.284984	-0.278522	19	19	15	48.8	48.8	41.1	54.099	0	84.858	1389700000	112	1.64659	1.54668	1.19662	F1LZW6	F1LZW6			0.0225637	0.0284001	0.0635887
Sgpl1	Sphingosine-1-phosphate lyase 1	1	-0.835039	-1.13127	-0.456655	0.962137	1.38427	1.47986	-0.57359	-0.64861	-0.181107	21	21	21	39.4	39.4	39.4	63.758	0	86.888	4239800000	218	1.79771	1.60012	1.24827	Q8CHN6	Q8CHN6			0.0159327	0.0251119	0.0564586
Samm50	Sorting and assembly machinery component 50 homolog	1	-0.918514	-0.50511	-0.324418	1.35106	1.37267	1.03849	-0.953244	-1.04836	-0.01258	23	23	23	46.1	46.1	46.1	51.96	0	77.233	2309600000	128	1.41534	0.956042	0.641482	Q6AXV4	Q6AXV4			0.0384291	0.110652	0.228306
Cyb5r1	NADH-cytochrome b5 reductase;NADH-cytochrome b5 reductase 1	1	-0.984314	-0.6234	-0.121083	1.43421	0.626604	1.67072	-0.602072	-0.552825	-0.847842	14	14	14	64.9	64.9	64.9	34.232	0	174.77	2585600000	151	1.33835	0.893974	0.585732	G3V9S0;Q5EB81	G3V9S0;Q5EB81			0.0458828	0.127652	0.259578
Lamp1	Lysosome-associated membrane glycoprotein 1	1	-0.694691	-0.6791	-0.256238	1.53358	1.15129	1.20738	-0.830575	-0.981128	-0.450528	8	8	8	27.3	27.3	27.3	43.969	0	98.651	20256000000	259	2.02282	1.35081	1.00887	P14562;A0A0U1RRS9	P14562			0.00948812	0.0445851	0.0979783
Svil		1	-0.634347	-1.15635	-0.358511	0.926963	1.14719	1.73751	-0.645395	-0.464009	-0.553046	56	56	56	29.1	29.1	29.1	242.05	0	218.97	2889300000	262	1.59059	1.29179	0.952869	F1M155;D3ZEZ9	F1M155;D3ZEZ9			0.0256691	0.0510752	0.111463
Nnt		1	-0.903152	-0.534715	-0.350784	0.680551	1.27958	1.76842	-1.0739	-0.334774	-0.53123	39	39	39	41.4	41.4	41.4	113.87	0	323.31	14575000000	631	1.32589	0.915327	0.60483	Q5BJZ3	Q5BJZ3			0.0472183	0.121527	0.248411
Acsl1	Long-chain-fatty-acid--CoA ligase 1	1	-0.461403	-0.664634	-0.158736	0.801344	1.54862	1.42479	-0.995756	-1.01348	-0.480737	27	27	24	42.8	42.8	38.9	78.178	0	134.47	4137000000	255	1.65196	0.846219	0.543353	P18163	P18163			0.0222864	0.142489	0.286185
Flot1	Flotillin-1	1	-0.704619	-0.764974	-0.31869	0.972656	1.50217	1.31569	-1.1208	-0.786028	-0.0954047	17	17	17	47.7	47.7	47.7	47.513	0	99.537	1112000000	109	1.49323	1.03231	0.710901	Q6P2A7;Q9Z1E1;Q6MG17;Q9Z1E1-2	Q6P2A7;Q9Z1E1;Q6MG17;Q9Z1E1-2			0.0321196	0.0928304	0.19458
Itgb1bp2		2	-1.03761	-1.1182	-1.33504	0.172112	0.31602	-0.106234	1.51388	1.10242	0.492655	7	7	7	26.1	26.1	26.1	38.62	0	15.945	246130000	15	1.61797	1.86713	1.5083	D3ZW59	D3ZW59			0.0241007	0.0135791	0.0310242
Sorbs3		2	-0.923467	-1.47479	-1.2772	0.173977	0.322651	0.245395	1.40211	0.828759	0.702568	9	9	9	16.6	16.6	16.6	82.095	0	41.052	1306600000	68	1.88194	2.17722	1.81327	Q5XIL4;Q8CJ75	Q5XIL4			0.0131238	0.00664936	0.015372
Tes	Testin	2	-1.44129	-1.20825	-0.74844	0.0718885	0.116462	-0.049121	1.36065	1.28722	0.610885	29	29	29	74	74	74	47.632	0	323.31	17523000000	539	1.68207	1.89385	1.53447	Q2LAP6;B0BMX0;A0A0G2K688	Q2LAP6			0.0207936	0.0127688	0.0292099
Syde2		2	-1.42792	-0.930112	-0.378409	-0.381018	-0.00368558	-0.499272	1.36133	1.40641	0.852678	5	5	5	4.9	4.9	4.9	129.4	0	15.84	141870000	12	1.44211	1.42974	1.08422	F1LVD8	F1LVD8			0.0361318	0.0371758	0.0823721
Rab30		2	-1.15381	-1.40765	-0.793734	-0.196385	0.204124	0.0072405	1.22075	1.4066	0.712865	6	5	5	33.5	29.6	29.6	23.058	0	10.155	176030000	17	1.77012	1.96019	1.59955	A0A0G2JTT4;Q5BK72	A0A0G2JTT4;Q5BK72			0.0169777	0.01096	0.0251449
Pragmin		2	-1.21701	-1.58108	-0.733151	0.461727	0.123371	0.0169188	1.19331	1.26932	0.466597	29	29	29	30.4	30.4	30.4	147.71	0	130.05	874310000	118	1.45098	1.72857	1.37299	D3ZMK9	D3ZMK9			0.0354014	0.0186823	0.0423653
Tmem206	Transmembrane protein 206	2	-0.905964	-1.47481	-0.766585	0.3815	0.225945	-0.605978	0.556346	1.60326	0.986288	4	4	4	19.7	19.7	19.7	40.072	0	28.002	242700000	26	1.13583	1.32629	0.985569	Q66H28	Q66H28			0.0731425	0.0471748	0.103379
Tpd52l2	Tumor protein D54	2	-0.876333	-0.807463	-1.39152	-0.0576813	0.0865107	-0.295234	0.709232	1.8537	0.778791	18	18	18	80.5	80.5	80.5	23.992	0	323.31	5683100000	262	1.29169	1.43117	1.08559	Q6PCT3	Q6PCT3			0.051087	0.0370536	0.0821126
Tnni2	Troponin I, fast skeletal muscle	2	-1.08817	-1.23582	-1.06294	0.288588	0.0181372	0.120524	0.900799	1.78102	0.27786	6	6	6	37.9	37.9	37.9	21.311	0	16.492	1570600000	43	1.23831	1.49296	1.14488	F8WG17;A0A0G2K0N9;P27768;A0A0G2K3X1	F8WG17;A0A0G2K0N9;P27768;A0A0G2K3X1			0.0577684	0.0321396	0.0716341
Ncdn	Neurochondrin	2	-1.3672	-1.38285	-0.536181	-0.498603	0.446151	0.249877	1.2655	0.631269	1.19203	12	12	12	19.8	19.8	19.8	78.923	0	39.804	676130000	61	1.23206	1.45393	1.1074	O35095	O35095			0.0586057	0.0351617	0.0780908
Pxn	Paxillin	2	-1.09718	-1.44235	-0.588113	-0.405629	0.311075	-0.249499	1.21554	1.2371	1.01905	25	25	25	59.1	59.1	59.1	60.915	0	323.31	6127200000	343	1.60367	1.72366	1.36821	Q1EG89;Q66H76;A0A0G2JY12	Q1EG89;Q66H76;A0A0G2JY12			0.0249075	0.0188947	0.0428341
Hectd1		2	-0.532635	-1.86075	-0.734331	-0.176835	-0.289064	0.391042	0.996884	1.00124	1.20444	63	63	62	32.4	32.4	32.1	289.03	0	323.31	3225800000	311	1.17453	1.35148	1.00951	D3ZLS5	D3ZLS5			0.0669068	0.0445164	0.097834
Smad3	Mothers against decapentaplegic homolog 3	2	-0.85998	-1.64171	-0.519367	-0.365086	0.363554	-0.346276	1.21425	0.83801	1.3166	10	10	5	29.6	29.6	12.5	48.08	0	16.672	515110000	43	1.27253	1.39547	1.05144	P84025;Q206L0	P84025			0.0533912	0.0402281	0.0888301
Ddah2	N(G),N(G)-dimethylarginine dimethylaminohydrolase 2	2	-0.900725	-1.23503	-1.25638	-0.401447	0.0249286	0.451234	1.20507	1.19089	0.921471	13	12	12	59.3	56.5	56.5	29.688	0	151.06	1065700000	89	1.81382	2.01432	1.65274	Q6MG60	Q6MG60			0.0153525	0.00967565	0.0222464
F3	Tissue factor	2	-1.0168	-1.06528	-0.760822	-0.746489	-0.25823	0.186513	1.0368	1.11811	1.50619	6	6	6	23.7	23.7	23.7	33.501	0	95.194	328910000	40	1.67139	1.67283	1.31877	Q66HI4;P42533	Q66HI4;P42533			0.0213113	0.0212408	0.0479988
Tp53bp1		2	-1.11467	-0.945147	-0.501375	-0.51804	-0.815744	0.196772	1.41806	1.01782	1.26233	40	40	40	31.1	31.1	31.1	212.86	0	323.31	1540900000	193	1.48106	1.38992	1.04615	F1M842	F1M842			0.0330324	0.0407455	0.0899187
Uprt		2	-0.895498	-1.0726	-1.10162	-0.896994	0.225563	0.380204	0.952994	1.08844	1.31951	12	12	12	50.5	50.5	50.5	34.242	0	88.595	1273500000	121	1.3134	1.44758	1.10131	D4ABC7	D4ABC7			0.0485959	0.0356796	0.0791936
Lmod3		2	-1.04385	-1.26031	-1.07107	-0.262789	-0.1331	0.529322	0.634665	1.36044	1.24669	9	9	9	19.2	19.2	19.2	66.09	0	39.305	218610000	26	1.59299	1.80401	1.44657	D4A871	D4A871			0.0255276	0.0157033	0.0357627
Micall2	MICAL-like protein 2	2	-1.36298	-0.974308	-0.986665	-0.400702	-0.200915	0.684247	1.13191	0.905775	1.20363	32	32	31	37.8	37.8	36.7	107.68	0	135.87	2705400000	155	1.48967	1.69248	1.33787	A0A0G2K365;D3ZEN0	A0A0G2K365;D3ZEN0			0.032384	0.0203011	0.0459335
Ppp1r12b	Protein phosphatase 1 regulatory subunit	2	-0.897501	-0.947811	-1.09978	-0.768431	-0.129854	0.216341	1.08632	1.15904	1.38167	13	11	11	14.1	12.5	12.5	111.39	0	116.6	2495700000	113	1.72234	1.76011	1.40372	D3ZIC4	D3ZIC4			0.0189522	0.0173736	0.0394712
Apex1	DNA-(apurinic or apyrimidinic site) lyase;DNA-(apurinic or apyrimidinic site) lyase, mitochondrial	2	-0.299098	-0.681619	-1.30847	-0.375489	-0.737748	-0.32236	1.21886	0.853442	1.65248	11	11	11	49.8	49.8	49.8	35.538	0	219.34	2960200000	172	1.39386	1.20034	0.866717	P43138;Q99PF3	P43138;Q99PF3			0.0403776	0.0630464	0.13592
Plin2	Perilipin	2	-0.343876	-0.944473	-1.49456	-0.609945	0.164488	-0.328647	1.06936	1.16917	1.31849	15	15	15	48.5	48.5	48.5	46.184	0	79.962	820280000	77	1.35381	1.37399	1.03095	F6QBA3;Q5U2U5	F6QBA3;Q5U2U5			0.0442782	0.0422678	0.0931215
Ddx17		2	-0.759407	-0.284872	-1.15109	-0.466305	-0.793774	-0.291102	0.728767	1.52054	1.49724	30	22	22	48.2	36.8	36.8	72.459	0	156.71	5962800000	279	1.41427	1.17372	0.841806	E9PT29;A0A096MIX2;A0A096MJW9;Q568Z8	E9PT29;A0A096MIX2			0.0385239	0.0670317	0.143944
		2	-0.561889	-0.702308	-1.53009	0.041467	-0.731997	-0.0975602	1.07335	1.21514	1.29389	42	42	42	27.9	27.9	27.9	222.02	0	158.43	2537100000	231	1.41431	1.42928	1.08377	A0A0G2JXT9	A0A0G2JXT9			0.0385203	0.0372152	0.0824575
Gprc5a		2	-0.535312	-1.5195	-1.13925	-0.0348367	-0.455081	0.375049	1.27941	1.18987	0.839653	3	3	3	18.6	18.6	18.6	21.795	0	8.4767	150520000	29	1.39132	1.55941	1.20891	Q5RK14;A1A5R2	Q5RK14;A1A5R2			0.0406144	0.0275797	0.0618144
Kpna2;LOC100359600	Importin subunit alpha	2	-0.761859	-1.01067	-1.49704	0.373807	-0.647393	0.386992	1.30189	1.05803	0.796248	18	18	18	55.6	55.6	55.6	57.835	0	171.79	6037800000	173	1.28556	1.49408	1.14596	Q9Z0N9;Q6P6T9;M0R7I0	Q9Z0N9;Q6P6T9;M0R7I0			0.0518132	0.0320568	0.0714562
Pdhx		3	-0.620834	-0.789915	-1.40269	0.965686	1.52858	1.04364	0.202951	-0.774773	-0.152652	12	12	12	33.3	33.3	33.3	54.169	0	125.56	1536600000	119	1.34538	1.37881	1.03555	A0A0G2JZH8;Q5BJX2;Q7TQ85	A0A0G2JZH8;Q5BJX2;Q7TQ85			0.0451461	0.0418013	0.0921404
Eno3	Beta-enolase	3	-0.564854	-0.865358	-1.7798	0.807459	1.64481	0.5892	0.225337	-0.0894857	0.0326862	22	17	14	60.6	47.2	37.3	47.013	0	195.25	8066200000	264	1.10265	1.32014	0.979728	P15429	P15429			0.0789496	0.0478476	0.104778
Aldh4a1;Tas1r2	Delta-1-pyrroline-5-carboxylate dehydrogenase, mitochondrial	3	-1.17551	-0.951207	-1.11006	1.01155	1.16376	1.36043	-0.26579	0.284755	-0.317928	11	11	11	24	24	24	61.844	0	54.873	698890000	91	2.11589	2.24235	1.8776	A0A0G2JVM0;B4F768;A0A0G2K9I7;A0A0G2JUB9;A0A0G2JUT5;Q7TP27;P0C2X9	A0A0G2JVM0;B4F768;A0A0G2K9I7;A0A0G2JUB9;A0A0G2JUT5;Q7TP27;P0C2X9			0.00765791	0.00572335	0.0132556
Hk2	Hexokinase-2;Hexokinase	3	-1.27639	-0.862288	-0.931419	1.30769	1.17086	1.23231	-0.173779	-0.131023	-0.335952	41	37	35	51.6	47.4	44.7	102.54	0	298.46	4636100000	362	2.67779	2.7196	2.35095	P27881;O54892	P27881;O54892			0.00209996	0.00190722	0.00445708
Atp1b3	Sodium/potassium-transporting ATPase subunit beta-3	3	-1.23725	-0.912009	-1.10616	1.43301	0.602951	1.20946	-0.350198	0.59633	-0.236124	9	9	9	36.6	36.6	36.6	31.829	0	51.588	3949300000	113	1.38363	1.57438	1.22338	Q63377	Q63377			0.04134	0.0266453	0.0597888
Ergic1		3	-1.30901	-0.650942	-1.04258	1.32208	0.377642	1.65487	-0.375497	0.0637249	-0.0402832	10	10	10	42.5	42.5	42.5	35.011	0	48.106	3172300000	129	1.2345	1.35707	1.01483	F1LU48	F1LU48			0.0582774	0.0439471	0.0966429
Mettl7a		3	-1.2653	-0.573277	-1.40875	1.27668	0.632597	1.41614	-0.0413341	0.136339	-0.173091	5	5	5	23.8	23.8	23.8	28.142	0	13.424	211230000	18	1.50261	1.67686	1.32269	Q3KRE2;Q3SWU1	Q3KRE2			0.0314333	0.0210446	0.0475675
Tmem119		3	-0.837959	-0.856304	-1.69901	1.59674	0.725999	0.586542	0.154091	0.464202	-0.1343	7	7	7	29.7	29.7	29.7	29.864	0	323.31	1380600000	87	1.20278	1.46458	1.11762	B2RYL3	B2RYL3			0.0626931	0.0343099	0.0762746
Rhot1	Mitochondrial Rho GTPase	3	-0.848181	-0.732486	-1.54902	1.45185	0.809715	1.03084	0.133859	0.329495	-0.626069	11	11	10	20.6	20.6	18.9	72.156	0	55.377	506370000	64	1.28496	1.44484	1.09868	A1L1L6;A0A0G2K777	A1L1L6;A0A0G2K777			0.0518848	0.0359054	0.0796746
Piezo1	Piezo-type mechanosensitive ion channel component 1	3	-0.775955	-1.12527	-1.555	1.53609	0.811962	0.719813	-0.130426	0.147386	0.371391	25	25	25	12.4	12.4	12.4	290.33	0	81.216	1089200000	104	1.47551	1.72546	1.36996	A0A0G2JWS3;Q0KL00	A0A0G2JWS3;Q0KL00			0.0334572	0.0188166	0.0426619
Ap1b1	AP complex subunit beta;AP-1 complex subunit beta-1	3	-0.700457	-1.17825	-1.59539	1.61534	0.730815	0.550855	0.0930603	0.281872	0.20215	49	28	28	71.5	53.4	53.4	103.82	0	323.31	3955400000	295	1.31158	1.58547	1.2341	A0A0G2K2V2;G3V9N8;P52303-2;P52303	A0A0G2K2V2;G3V9N8;P52303-2;P52303			0.0488	0.0259735	0.0583311
Glrx3	Glutaredoxin-3	3	-1.37495	-1.0375	-1.10693	1.49667	0.535451	1.02078	0.378288	0.258679	-0.170484	21	21	21	75.4	75.4	75.4	37.849	0	323.31	13784000000	833	1.59444	1.85524	1.49667	Q9JLZ1;A0A0G2K5P8;Q9JLZ1-2	Q9JLZ1;A0A0G2K5P8;Q9JLZ1-2			0.0254425	0.013956	0.0318662
Tufm	Elongation factor Tu, mitochondrial	3	-1.35651	-0.798289	-1.15642	0.750804	1.2775	0.935941	-0.0756101	0.924948	-0.502368	27	27	27	64.4	64.4	64.4	49.522	0	323.31	12877000000	458	1.14659	1.39006	1.04628	P85834	P85834			0.0713526	0.0407324	0.0898918
Itga1	Integrin alpha-1	3	-0.963352	-1.20975	-1.37628	0.732797	1.34687	0.993078	0.0180335	0.597776	-0.139168	22	22	22	19.4	19.4	19.4	130.81	0	141.2	2687300000	178	1.71217	1.9745	1.61361	P18614	P18614			0.0194013	0.0106047	0.0243439
Gcat		3	-0.985796	-1.31371	-1.21091	0.568398	1.32347	1.26414	0.178724	0.328661	-0.152974	7	7	7	25.2	25.2	25.2	45.223	0	25.199	547280000	33	1.76783	2.01307	1.65151	Q562C3;A0A0G2K2Q2	Q562C3;A0A0G2K2Q2			0.0170675	0.00970354	0.0223095
Aldh2	Aldehyde dehydrogenase, mitochondrial	3	-0.75973	-1.11992	-1.35402	0.684341	1.39726	1.27586	-0.303461	0.38858	-0.208918	28	28	25	66.9	66.9	63.6	56.516	0	323.31	19437000000	697	1.54046	1.70587	1.35089	F1LN88;P11884;A0A0H2UHP1;P51647	F1LN88;P11884			0.0288098	0.0196848	0.0445769
Itga7	Integrin alpha-7;Integrin alpha-7 heavy chain;Integrin alpha-7 light chain;Integrin alpha-7 70 kDa form	3	-1.03042	-1.18926	-1.36305	0.995333	1.12474	1.15966	0.0901444	-0.0252262	0.238073	31	31	2	36.9	36.9	2.8	124.19	0	252.57	6639700000	332	2.82168	3.05883	2.68874	Q63258;Q63258-3;Q63258-2	Q63258;Q63258-3;Q63258-2			0.00150772	0.000873313	0.00204767
Acads	Short-chain specific acyl-CoA dehydrogenase, mitochondrial	3	-1.10554	-1.07004	-1.23214	0.948536	1.0285	1.42461	-0.203959	-0.0737514	0.283789	18	18	18	56.3	56.3	56.3	44.967	0	131.12	2814300000	164	2.20262	2.38995	2.02367	Q6IMX3;P15651	Q6IMX3;P15651			0.00627162	0.00407427	0.00946956
Acsl3	Long-chain-fatty-acid--CoA ligase 3	3	-1.10207	-0.996691	-1.39583	0.977258	1.1465	1.24756	-0.00670198	0.133335	-0.00336183	28	28	28	54.3	54.3	54.3	80.457	0	170.1	3379800000	243	2.65603	2.8637	2.49435	Q63151;Q63151-2	Q63151;Q63151-2			0.00220785	0.00136867	0.00320369
Vac14	Protein VAC14 homolog	3	-0.807589	-1.31726	-1.40702	0.596819	0.624237	1.59059	0.457349	0.369503	-0.106628	25	25	25	42.8	42.8	42.8	88.067	0	144.72	1820200000	188	1.3329	1.62323	1.27065	Q80W92;A0A0G2JVB5	Q80W92			0.0464622	0.0238106	0.0536229
Atp5j	ATP synthase-coupling factor 6, mitochondrial	3	-1.0022	-1.24011	-1.16896	0.888287	0.993126	1.50084	0.15582	-0.18802	0.0612239	6	6	6	45.4	45.4	45.4	12.494	0	55.243	2593100000	90	2.12269	2.31436	1.94882	P21571	P21571			0.00753894	0.00484886	0.0112507
Clu	Clusterin;Clusterin;Clusterin beta chain;Clusterin alpha chain	3	-1.1233	-0.943039	-1.54382	0.754975	0.804749	1.43055	0.34167	-0.0125216	0.290736	10	10	10	26.4	26.4	26.4	51.464	0	44.263	536210000	43	1.74774	2.02845	1.66664	Q6P7S6;G3V836;P05371;Q9ERD1;A0A0G2KB42;O35510	Q6P7S6;G3V836;P05371;Q9ERD1			0.0178756	0.00936591	0.0215457
Csrp3	Cysteine and glycine-rich protein 3	3	-1.16631	-1.20558	-1.16474	0.928154	0.726568	1.51563	0.37295	-0.0483457	0.0416664	7	7	7	41.8	41.8	41.8	20.862	0	53.645	4241500000	128	1.89593	2.14289	1.77939	G3V7U0;P50463;A0A0G2K1N8	G3V7U0;P50463;A0A0G2K1N8			0.0127078	0.00719631	0.0166192
Pkd2		3	-1.4284	-0.742519	-1.43651	0.964019	0.616675	1.10724	0.86725	-0.140722	0.192965	13	13	13	17.9	17.9	17.9	109.09	0	58.88	377520000	40	1.37314	1.68362	1.32925	D4A5F1	D4A5F1			0.0423506	0.0207195	0.0468544
Cul5	Cullin-5	3	-0.80727	-1.31603	-1.48182	1.03933	0.595628	1.32457	0.446369	0.177204	0.0220066	25	25	25	34.3	34.3	34.3	98.767	0	115.28	1301200000	136	1.67751	1.96112	1.60046	A0A0H2UHG3;Q9JJ31	A0A0H2UHG3;Q9JJ31			0.0210131	0.0109365	0.0250923
Sntb1		3	-0.964397	-1.33248	-1.22017	0.88067	1.05461	1.32727	0.279463	-0.209652	0.184693	21	21	19	49.9	49.9	47.3	58.292	0	109.11	1892100000	122	2.12371	2.35357	1.98764	D3ZWC6	D3ZWC6			0.00752125	0.00443027	0.0102887
		3	-1.06974	-0.894873	-1.44802	0.861453	1.18928	1.2128	0.49464	-0.0579786	-0.287562	4	4	4	29.9	29.9	29.9	22.318	0	9.3856	71721000	16	1.73195	1.94525	1.58489	Q9JJ49	Q9JJ49			0.0185375	0.0113436	0.0260082
Mavs	Mitochondrial antiviral-signaling protein	3	-0.861306	-1.15658	-1.38729	1.12175	1.18908	1.05987	0.247112	0.135198	-0.347835	10	10	10	31.6	31.6	31.6	53.804	0	84.3	770120000	76	2.04355	2.23637	1.87169	Q66HG9	Q66HG9			0.00904586	0.0058027	0.0134372
Acaa2	3-ketoacyl-CoA thiolase, mitochondrial	3	-0.675104	-0.770949	-1.6097	0.998276	1.28819	1.02299	0.137351	0.334039	-0.725098	19	19	19	73.6	73.6	73.6	41.885	0	167.81	2559700000	173	1.22769	1.37043	1.02756	G3V9U2;A0A0G2K642;P13437	G3V9U2;A0A0G2K642;P13437			0.0591984	0.0426157	0.0938512
Slc12a4	Solute carrier family 12 member 4	3	-0.759529	-1.30164	-1.28639	0.960101	1.13648	1.25742	0.421132	-0.287298	-0.140281	25	25	19	25.4	25.4	21	120.63	0	104.92	1810500000	177	1.78713	1.97328	1.6124	Q63632	Q63632			0.0163256	0.0106346	0.0244118
Aagab	Alpha- and gamma-adaptin-binding protein p34	3	-0.78487	-1.1195	-1.65853	1.13364	0.605468	1.25442	0.297081	0.257342	0.0149446	8	8	8	26.7	26.7	26.7	34.363	0	101.61	228250000	35	1.61215	1.8863	1.52708	Q9R0Z7	Q9R0Z7			0.0244259	0.0129927	0.0297112
Vldlr	Very low-density lipoprotein receptor	3	-0.905496	-0.945866	-1.67004	1.183	1.0044	0.944006	0.196482	0.360953	-0.16744	39	39	39	54.5	54.5	54.5	96.472	0	323.31	6107400000	432	1.74728	1.99765	1.63636	F1LPV2;P98166	F1LPV2;P98166			0.0178945	0.0100543	0.0231015
Fas	Tumor necrosis factor receptor superfamily member 6	3	-1.05521	-0.968172	-1.52141	0.967315	0.935128	1.22568	0.375925	0.320279	-0.279533	2	2	2	12.3	12.3	12.3	36.774	0	81.192	1133100000	49	1.81683	2.071	1.70853	F1LWQ2;Q63199;Q9R230	F1LWQ2;Q63199;Q9R230			0.0152465	0.0084918	0.0195646
Ctsd	Cathepsin D;Cathepsin D 12 kDa light chain;Cathepsin D 9 kDa light chain;Cathepsin D 34 kDa heavy chain;Cathepsin D 30 kDa heavy chain	3	-0.937865	-1.14216	-1.66188	0.905384	1.14369	0.786617	0.369657	0.384304	0.152248	16	16	16	48.4	48.4	48.4	44.622	0	170.77	17359000000	354	1.98738	2.30018	1.93479	Q6P6T6;P24268	Q6P6T6;P24268			0.0102948	0.0050098	0.0116201
Prdx5	Peroxiredoxin-5, mitochondrial	3	-1.06268	-1.10427	-1.60884	0.632595	0.976695	1.07231	0.174238	0.689607	0.230347	11	11	11	54.9	54.9	54.9	22.206	0	193.86	18920000000	314	1.87232	2.20145	1.83719	A0A0G2JSS8;Q9R063-2;Q9R063	A0A0G2JSS8;Q9R063-2;Q9R063			0.0134178	0.00628854	0.0145482
Atp2a1	Calcium-transporting ATPase;Sarcoplasmic/endoplasmic reticulum calcium ATPase 1	3	-1.11234	-1.16725	-1.46057	1.01066	0.988543	1.02857	0.2879	0.34896	0.0755341	39	26	20	46.5	31.8	25.3	109.41	0	215.37	2276600000	189	2.78017	3.07317	2.70302	B4F7E5;Q64578;M0RCD2	B4F7E5;Q64578			0.00165894	0.000844948	0.00198144
Dcakd	Dephospho-CoA kinase domain-containing protein	3	-1.32581	-1.19439	-1.11599	1.00848	0.965602	1.17706	0.375171	0.265342	-0.155454	12	12	12	46.7	46.7	46.7	27.352	0	34.907	1131300000	73	2.38901	2.65286	2.28461	Q6AY55	Q6AY55			0.0040831	0.00222403	0.00519266
Cdv3	Protein CDV3 homolog	3	-0.9897	-1.1931	-1.25391	1.37826	0.922419	1.06959	0.272114	0.0295311	-0.235213	14	14	13	54.8	54.8	47	29.647	0	323.31	13514000000	324	2.19491	2.39314	2.02684	A0A0G2K0B0;Q5XIM5;Q6QI67	A0A0G2K0B0;Q5XIM5			0.00638396	0.00404445	0.0094007
Ipo5		3	-1.07669	-1.29706	-1.1135	1.18817	0.935312	0.945487	0.684884	0.208295	-0.474898	52	52	51	75	75	73.9	123.7	0	323.31	16649000000	743	1.54334	1.79752	1.44024	D4A781;M0RB74	D4A781;M0RB74			0.0286194	0.0159397	0.0362877
Tpm1	Tropomyosin alpha-1 chain	3	-1.13196	-1.38074	-1.18179	0.979273	1.19931	0.873309	0.275461	0.420565	-0.0534235	30	3	0	78.6	13.7	0	28.696	0	26.097	292820000	34	2.37779	2.66214	2.29382	Q6AZ25;P04692-8	Q6AZ25;P04692-8			0.00418996	0.00217701	0.0050837
Sccpdh	Saccharopine dehydrogenase-like oxidoreductase	3	-1.17527	-1.46698	-1.02863	1.04366	1.02918	0.900933	0.481993	0.418236	-0.203132	15	15	15	49.2	49.2	49.2	47.088	0	236.01	2100200000	152	1.95408	2.24442	1.87964	Q6AY30	Q6AY30			0.0111153	0.00569613	0.0131935
		3	-0.896899	-1.47577	-1.36733	1.0277	1.03663	0.847378	0.105817	0.47761	0.244868	25	25	25	17.9	17.9	17.9	187.6	0	57.806	831600000	68	2.17749	2.48282	2.11575	A0A0G2K5P5	A0A0G2K5P5			0.00664523	0.00328988	0.00766037
Ap2b1	AP complex subunit beta;AP-2 complex subunit beta	3	-0.952156	-1.42493	-1.18493	1.15338	1.27141	0.749493	-0.116602	0.321404	0.182933	52	52	31	64.9	64.9	46.9	105.69	0	323.31	25985000000	777	2.01687	2.26694	1.90191	Q3ZB97;P62944;P62944-2	Q3ZB97;P62944;P62944-2			0.009619	0.00540829	0.012534
Dhrs1		3	-0.958591	-0.793731	-1.04102	1.68839	1.02241	0.821581	-0.12256	0.23552	-0.851998	6	6	6	22.7	22.7	22.7	34.015	0	17.121	124080000	19	1.31804	1.34834	1.00652	Q6AXY8	Q6AXY8			0.0480795	0.0448394	0.0985099
Hadh	Hydroxyacyl-coenzyme A dehydrogenase, mitochondrial	3	-1.1058	-0.822219	-1.24794	1.31122	1.31268	0.85782	-0.567756	0.197563	0.0644322	9	9	9	45.2	45.2	45.2	34.447	0	50.458	723750000	52	1.72563	1.85287	1.49434	Q9WVK7	Q9WVK7			0.0188092	0.0140323	0.0320376
Tuba4a	Tubulin alpha-4A chain	3	-0.745105	-1.17469	-1.38508	0.80175	1.64242	0.695707	-0.294176	0.484683	-0.0255145	29	4	4	63.8	12.1	12.1	49.924	0	124.99	1515200000	92	1.31428	1.53101	1.18151	Q5XIF6	Q5XIF6			0.0484976	0.0294435	0.06584
Ivd	Isovaleryl-CoA dehydrogenase, mitochondrial	3	-0.97702	-0.709334	-1.68307	0.874102	1.17381	0.942794	-0.512078	0.544999	0.34579	16	16	16	51.9	51.9	51.9	46.435	0	132.37	2626900000	143	1.24328	1.49143	1.14341	P12007	P12007			0.057111	0.032253	0.071877
Mdh2	Malate dehydrogenase, mitochondrial;Malate dehydrogenase	3	-0.813826	-0.993133	-1.54296	1.01798	1.36156	0.973419	-0.287126	0.213312	0.0707728	20	20	20	68	68	68	35.683	0	277.1	75189000000	1153	1.79088	1.97763	1.61668	P04636;Q0QF43	P04636;Q0QF43			0.0161853	0.0105286	0.0241724
Slc25a3	Phosphate carrier protein, mitochondrial	3	-0.387197	-0.883987	-1.82097	1.07352	0.920451	1.30953	-0.191189	-0.0366439	0.0164739	12	12	1	39	39	7.6	39.531	0	168.26	25126000000	304	1.2578	1.40856	1.06395	G3V741;P16036	G3V741;P16036			0.0552332	0.0390337	0.0863078
Dapk3	Death-associated protein kinase 3	3	-0.584983	-1.19402	-1.48331	1.17337	1.31453	0.661893	-0.530836	0.309906	0.333458	10	10	10	23.9	23.9	23.9	52.748	0	72.316	913510000	49	1.26861	1.47704	1.12958	A0A0A0MXZ9;O88764;O88764-2;O88209	A0A0A0MXZ9;O88764;O88764-2			0.0538753	0.0333396	0.0742027
Ca1	Carbonic anhydrase 1	3	-0.897971	-0.784325	-1.4481	1.16396	1.34285	1.10643	-0.204592	-0.0425187	-0.235736	9	9	9	42.1	42.1	42.1	28.299	0	18.331	290550000	29	2.13037	2.21462	1.8502	B0BNN3	B0BNN3			0.00740679	0.0061007	0.0141189
Mesdc2	LDLR chaperone MESD	3	-0.674226	-0.75599	-1.39493	1.65651	1.0362	0.832449	-0.550165	0.244039	-0.393885	12	12	12	57.1	57.1	57.1	25.215	0	246.9	11787000000	375	1.33289	1.3729	1.02991	Q5U2R7	Q5U2R7			0.0464633	0.0423741	0.0933448
Hspd1	60 kDa heat shock protein, mitochondrial	3	-0.841357	-1.03665	-1.30692	1.47725	1.2275	0.787874	-0.278663	0.232034	-0.26107	42	42	42	77.1	77.1	77.1	60.955	0	323.31	83660000000	1981	1.77934	1.90577	1.54616	P63039	P63039			0.0166211	0.0124231	0.0284341
Dysf		3	-0.81906	-1.12861	-1.06344	1.5117	1.27052	0.872577	-0.376103	0.0740028	-0.341588	84	81	80	51.6	50.3	50	242.46	0	323.31	8223100000	596	1.9729	2.01791	1.65628	A0A0G2K7B6;D4A6X1	A0A0G2K7B6;D4A6X1			0.0106439	0.00959599	0.0220658
Psmb9	Proteasome subunit beta type;Proteasome subunit beta type-9	3	-0.738779	-1.29719	-0.893185	1.83589	0.828472	0.886212	-0.180997	-0.190478	-0.249941	2	2	2	8.7	8.7	8.7	23.343	0	5.3419	51552000	4	1.49262	1.54937	1.19922	Q6MGA6;A0A023ILN9;P28077	Q6MGA6;A0A023ILN9;P28077			0.0321647	0.0282247	0.0632092
		3	-0.324739	-1.26771	-1.01131	1.37969	1.25968	1.03589	-0.65648	0.0959978	-0.511023	36	36	36	47.5	47.5	47.5	112.68	0	279.02	6263000000	368	1.45673	1.38753	1.04386	A0A0G2K261;A0A0G2K150;D4A8P9	A0A0G2K261;A0A0G2K150			0.0349357	0.0409704	0.0903941
Msmo1	Methylsterol monooxygenase 1	3	-0.806858	-1.06097	-1.31255	1.42185	1.40076	0.687999	-0.131569	-0.0429703	-0.155692	6	6	6	30.7	30.7	30.7	34.963	0	16.102	570480000	41	1.82748	1.9487	1.58827	O35532	O35532			0.0148772	0.0112538	0.0258066
Htra1	Serine protease HTRA1	3	-0.75711	-1.29715	-1.33115	1.11677	1.32741	0.973801	0.0638859	-0.103106	0.00664754	27	27	27	68.5	68.5	68.5	51.33	0	323.31	50465000000	1104	2.17208	2.35229	1.98637	Q9QZK5	Q9QZK5			0.00672853	0.00444334	0.0103188
Dbt		3	-0.388078	-1.09136	-1.28656	1.50752	1.20294	0.968256	-0.426884	-0.393985	-0.0918515	17	17	17	41.5	41.5	41.5	53.273	0	82.282	1823200000	148	1.62425	1.59929	1.24747	B2GV15;Q99PU6	B2GV15;Q99PU6			0.0237547	0.02516	0.0565627
Tpp2	Tripeptidyl-peptidase 2	3	-0.679504	-1.18921	-1.25717	1.18272	1.33065	1.11585	-0.0442104	-0.125516	-0.333619	63	63	63	58	58	58	138.29	0	323.31	15728000000	861	2.2122	2.29103	1.92574	Q64560	Q64560			0.00613479	0.00511646	0.0118648
Scarb2	Lysosome membrane protein 2	3	-0.85375	-0.695027	-1.20298	1.759	1.33831	0.443978	-0.393723	-0.0855396	-0.310274	15	15	15	42.1	42.1	42.1	54.09	0	323.31	4701100000	253	1.29975	1.3172	0.97694	P27615	P27615			0.0501476	0.0481726	0.105453
Sqle	Squalene monooxygenase	3	-0.684873	-0.681553	-1.0849	1.63869	1.54494	0.515012	-0.550084	-0.291964	-0.405263	14	14	14	30.5	30.5	30.5	64.023	0	41.042	647410000	57	1.41006	1.28436	0.945838	P52020;Q8CJ80	P52020			0.0388991	0.0519565	0.113282
Maoa	Amine oxidase [flavin-containing] A	3	-1.1018	-1.16662	-1.13337	1.42772	0.885409	0.563743	0.0826372	0.890362	-0.448082	18	18	18	44.4	44.4	44.4	58.802	0	170.37	3761500000	253	1.18777	1.45456	1.108	B2GV33;G3V9Z3;P21396	B2GV33;G3V9Z3;P21396			0.0648978	0.0351107	0.077983
Acad11	Acyl-CoA dehydrogenase family member 11	3	-1.2201	-1.41035	-1.00077	1.32951	0.867015	0.427977	-0.0653977	0.881911	0.190208	16	16	16	24.6	24.6	24.6	87.37	0	33.236	621450000	47	1.37388	1.69195	1.33736	B3DMA2	B3DMA2			0.0422785	0.0203259	0.0459875
Atad1	ATPase family AAA domain-containing protein 1	3	-1.04693	-1.20401	-1.17104	1.47861	1.31593	0.229151	0.118807	0.311972	-0.0324845	12	12	6	38.5	38.5	15.9	45.091	0	81.804	1588600000	94	1.35709	1.60821	1.25611	A0A0H2UHI7;Q505J9	A0A0H2UHI7;Q505J9			0.0439451	0.0246485	0.0554485
	UPF0554 protein C2orf43 homolog	3	-1.31779	-0.905779	-1.3937	1.03523	1.28823	0.265391	0.54924	0.615396	-0.136224	7	7	7	34.8	34.8	34.8	36.881	0	16.979	172150000	20	1.32169	1.6409	1.28778	Q5HZX7	Q5HZX7			0.0476771	0.0228613	0.051549
Fkbp10		3	-1.25675	-0.707945	-1.29283	0.951509	1.65466	0.37512	0.207991	0.491518	-0.423267	28	28	27	55.4	55.4	55.4	64.786	0	310.9	9147700000	464	1.10157	1.33498	0.993827	Q5U2V1;A0A096MJW1	Q5U2V1;A0A096MJW1			0.0791462	0.0462402	0.101432
Acad8		3	-1.26028	-1.16221	-1.18091	0.989807	1.46773	0.309155	0.096369	0.647244	0.0930978	7	7	7	19	19	19	45.155	0	16.824	327930000	25	1.4328	1.73595	1.38017	M0RDK9	M0RDK9			0.0369148	0.0183675	0.0416706
St13	Hsc70-interacting protein	3	-1.1187	-1.36138	-1.04933	0.77379	1.6979	0.346844	0.203895	0.358472	0.148516	12	12	12	30.4	30.4	30.4	41.279	0	148.13	12454000000	372	1.33459	1.62393	1.27133	P50503	P50503			0.0462818	0.0237722	0.053539
Naa25	N-alpha-acetyltransferase 25, NatB auxiliary subunit	3	-1.84614	-1.05997	-0.715494	1.19234	0.321316	0.816289	0.460956	0.0932039	0.7375	22	22	22	27	27	27	111.79	0	68.105	914570000	82	1.20287	1.53781	1.18808	A0A0G2K9Q3;Q6QI44	A0A0G2K9Q3;Q6QI44			0.0626801	0.0289861	0.0648515
Tecr	Very-long-chain enoyl-CoA reductase	3	-1.80229	-1.04142	-0.630908	1.06579	0.322569	1.19869	0.155285	-0.0212416	0.753523	13	13	13	32.1	32.1	32.1	36.122	0	36.382	4112800000	150	1.09829	1.40219	1.05786	B3SVE9;Q64232	B3SVE9;Q64232			0.0797462	0.0396105	0.0875266
Lamtor5		3	-1.94248	-0.959451	-0.636565	0.994153	1.0687	0.532112	-0.0185102	0.591303	0.370739	4	4	4	47.4	47.4	47.4	16.39	0	323.31	869760000	82	1.19128	1.50158	1.15317	D3ZF11	D3ZF11			0.0643754	0.0315079	0.0702797
Dlat	Dihydrolipoyllysine-residue acetyltransferase component of pyruvate dehydrogenase complex, mitochondrial	3	-1.41	-1.0572	-1.03034	0.870825	1.46973	0.636683	-0.334261	0.553688	0.300871	24	24	24	47.9	47.9	47.9	67.165	0	140.08	6020000000	262	1.43975	1.7072	1.35219	P08461	P08461			0.0363287	0.0196246	0.0444437
Slc20a2	Sodium-dependent phosphate transporter 2	3	-1.54402	-1.39805	-0.443274	1.37929	0.976792	0.686445	0.369708	-0.0218435	-0.0050476	9	9	9	20.3	20.3	20.3	70.747	0	58.47	426190000	45	1.31977	1.56311	1.21249	F1M8N9;Q63488;Q7TP93	F1M8N9;Q63488			0.0478884	0.0273458	0.061307
Pfkm	ATP-dependent 6-phosphofructokinase;ATP-dependent 6-phosphofructokinase, muscle type	3	-1.64198	-0.990303	-1.06222	1.05216	0.59572	1.19983	0.339993	0.0963084	0.410496	31	31	27	49.7	49.7	44.9	85.342	0	285.1	25707000000	280	1.79578	2.10198	1.73904	Q52KS1;A0A0G2KBC7;P47858;Q9Z1I3	Q52KS1;A0A0G2KBC7;P47858			0.0160037	0.00790715	0.0182373
Palld	Palladin	3	-1.75577	-0.9105	-0.814398	1.43146	0.627694	0.914569	0.224537	-0.0249674	0.307377	42	42	41	53.2	53.2	52.1	108.34	0	323.31	19810000000	781	1.40309	1.66872	1.31478	F1M265;P0C5E3	F1M265;P0C5E3			0.0395285	0.0214427	0.0484418
Glb1l2	Beta-galactosidase	3	-1.6362	-1.06781	-0.569758	1.05414	1.13939	1.13619	-0.315904	0.02024	0.239711	7	7	7	13.7	13.7	13.7	73.978	0	27.929	148360000	16	1.55896	1.73701	1.38121	D3ZHQ5	D3ZHQ5			0.0276083	0.0183227	0.041571
Map2k2	Dual specificity mitogen-activated protein kinase kinase 2	3	-1.34078	-1.60857	-0.444931	1.42623	0.757051	0.831129	-0.0901235	0.223588	0.246407	17	10	10	48.2	31.8	31.8	44.281	0	145.94	1997300000	86	1.30291	1.55138	1.20116	P36506	P36506			0.049784	0.0280944	0.0629274
Ca3	Carbonic anhydrase 3	3	-1.31806	-1.08822	-1.11881	1.25091	1.1676	0.937851	0.00934156	0.0233591	0.136035	16	16	16	86.9	86.9	86.9	29.431	0	323.31	88957000000	1005	2.89926	3.11458	2.74431	P14141	P14141			0.00126107	0.000768104	0.00180173
Stbd1	Starch-binding domain-containing protein 1	3	-1.3185	-1.18111	-0.935575	1.07414	1.50858	0.701757	0.148798	-0.152386	0.154288	14	14	14	49.8	49.8	49.8	35.494	0	135.89	981770000	80	1.85628	2.06961	1.70716	Q5FVN1	Q5FVN1			0.0139226	0.00851903	0.0196264
Akr1b1	Aldose reductase	3	-1.30313	-1.12584	-1.15134	1.49247	1.0502	0.491841	0.0297374	0.292798	0.22325	21	21	20	81.3	81.3	78.8	35.797	0	323.31	80928000000	877	1.7342	2.00563	1.6442	P07943	P07943			0.0184417	0.0098712	0.0226882
Mdh1	Malate dehydrogenase, cytoplasmic	3	-1.27456	-1.07235	-0.807672	1.71033	0.818463	0.83935	-0.440958	-0.0495625	0.276957	12	12	12	44.3	44.3	44.3	36.483	0	123.26	15790000000	359	1.43334	1.58201	1.23076	O88989	O88989			0.0368689	0.0261812	0.0587814
Hspa4	Heat shock 70 kDa protein 4	3	-0.946233	-0.924304	-1.30858	1.53776	1.02022	0.61583	-0.647137	0.0797426	0.572706	59	59	57	75.7	75.7	73.1	94.055	0	323.31	42490000000	1510	1.1972	1.38802	1.04433	O88600;F1LRV4;B4F772	O88600;F1LRV4			0.0635038	0.0409242	0.0902963
Prdx1	Peroxiredoxin-1	3	-1.41273	-1.14109	-0.956971	1.46261	0.95188	0.749305	-0.0961074	0.0316461	0.411461	16	16	14	67.8	67.8	63.8	22.164	0	171.67	57276000000	767	1.78722	2.03137	1.66951	A0A0G2K3Z9;Q63716	A0A0G2K3Z9;Q63716			0.0163222	0.00930315	0.0214038
Ahcyl2	Adenosylhomocysteinase	3	-1.31733	-1.11458	-1.1185	1.49931	0.9776	0.484376	0.199689	-0.134956	0.524392	14	5	5	23.9	9.3	9.3	66.817	0	14.83	118500000	25	1.53389	1.81024	1.45266	D3ZWL6	D3ZWL6			0.0292489	0.0154796	0.0352647
Pir	Pirin	3	-0.425991	-1.4581	-1.43813	0.656405	0.597348	1.60839	-0.187351	0.273868	0.373568	10	10	10	38.1	38.1	38.1	32.178	0	29.677	1006800000	94	1.08197	1.33994	0.998538	Q5M827	Q5M827			0.0827999	0.0457151	0.100337
Snx8		3	-0.503503	-1.03772	-1.73998	0.635047	0.97184	1.47998	-0.180836	0.209088	0.166079	12	12	12	32.6	32.6	32.6	52.657	0	53.496	637160000	66	1.22381	1.44521	1.09904	D3ZUJ9	D3ZUJ9			0.0597297	0.0358748	0.0796086
Mb21d2		3	-0.363876	-1.48006	-1.58651	0.547164	0.556278	1.51342	0.164769	0.21692	0.431893	8	8	8	16.1	16.1	16.1	55.761	0	47.714	267970000	18	1.0591	1.35557	1.01341	D4ACS3	D4ACS3			0.087277	0.0440991	0.0969594
Gpd1l	Glycerol-3-phosphate dehydrogenase [NAD(+)]	3	-0.582797	-1.02728	-1.85613	0.791426	0.376795	1.4085	0.0901147	0.199654	0.599717	14	14	14	38.2	38.2	38.2	38.066	0	41.135	1081200000	85	1.08262	1.3864	1.04279	D3ZAP9;O35077	D3ZAP9			0.0826761	0.0410771	0.0906171
Uggt1	UDP-glucose:glycoprotein glucosyltransferase 1	3	-0.653007	-0.979288	-1.78817	1.05451	0.53272	1.25225	0.158156	-0.200106	0.622947	68	68	67	56.5	56.5	56	176.43	0	323.31	20287000000	870	1.18368	1.45716	1.11049	Q9JLA3	Q9JLA3			0.0655119	0.0349012	0.0775372
Adam10	Disintegrin and metalloproteinase domain-containing protein 10	3	-0.803568	-1.50089	-1.09745	0.98762	0.744655	1.1002	-0.227162	-0.229377	1.02598	13	13	13	21.4	21.4	21.4	84.086	0	51.757	615050000	52	1.15436	1.42624	1.08086	A0A0G2K562;Q10743	A0A0G2K562;Q10743			0.0700874	0.0374766	0.0830118
Stxbp1	Syntaxin-binding protein 1	3	-0.948455	-1.42329	-1.01011	0.958068	0.887009	1.34889	-0.268469	-0.192506	0.648864	25	25	25	54.4	54.4	54.4	67.568	0	176.38	3452900000	301	1.52032	1.74033	1.38444	P61765;P61765-2	P61765;P61765-2			0.0301773	0.0181832	0.0412629
Eml2	Echinoderm microtubule-associated protein-like 2	3	-0.660357	-1.70027	-1.09416	1.152	0.46943	1.26847	0.270893	-0.171405	0.465395	24	24	24	48.4	48.4	48.4	70.71	0	227.88	3811500000	260	1.27427	1.54648	1.19644	Q6P6T4;Q6P6T4-2	Q6P6T4;Q6P6T4-2			0.0531778	0.0284132	0.0636151
Des	Desmin	3	-0.758919	-1.63578	-1.28284	0.94037	0.940808	1.03365	0.0634419	0.25954	0.439724	23	18	18	51.6	43.7	43.7	53.422	0	63.358	943850000	60	1.85216	2.14966	1.78606	Q6P725;P48675	Q6P725;P48675			0.0140553	0.007085	0.0163659
Pgm1	Phosphoglucomutase-1	3	-1.02693	-1.27302	-0.961041	1.12215	0.502124	1.58472	0.0960762	-0.451182	0.4071	28	28	28	67.4	67.4	67.4	61.389	0	309.94	6002100000	319	1.34056	1.53871	1.18894	Q499Q4;A1A5L2;P38652;Q62752	Q499Q4;A1A5L2;P38652			0.0456499	0.0289261	0.0647232
Ak2	Adenylate kinase 2, mitochondrial;Adenylate kinase 2, mitochondrial, N-terminally processed	3	-0.957441	-1.49212	-0.696158	1.07925	0.448499	1.62134	-0.353332	-0.134446	0.484413	15	15	15	68.1	68.1	68.1	25.529	0	78.146	3737100000	248	1.13736	1.32699	0.986233	A0A0G2JSG6;P29410-2;P29410	A0A0G2JSG6;P29410-2;P29410			0.0728853	0.0470988	0.103221
Sec24c		3	-1.02031	-1.61657	-0.717042	0.668339	0.533419	1.73012	-0.0260872	0.169827	0.278306	28	28	28	31.6	31.6	31.6	114.7	0	239.78	3032800000	213	1.17096	1.42462	1.07931	A0A0G2JZF0;B5DEG8	A0A0G2JZF0;B5DEG8			0.067459	0.0376166	0.0833086
Psmd12		3	-1.07415	-1.52698	-0.800914	0.672597	1.28664	1.14144	-0.318498	0.0194234	0.60044	22	22	22	54.2	54.2	54.2	52.936	0	243.99	8103800000	328	1.41821	1.65566	1.3021	Q5XIC6	Q5XIC6			0.038176	0.0220973	0.049877
RGD1311357		3	-0.799608	-1.40231	-0.988769	0.942829	1.36639	1.2218	-0.349658	-0.146099	0.155427	24	24	24	10.7	10.7	10.7	306.62	0	50.622	560810000	72	1.93248	2.0508	1.68864	F1M6V0	F1M6V0			0.0116821	0.00889611	0.0204814
Atp7a	Copper-transporting ATPase 1	3	-0.542933	-1.36157	-1.3689	0.709866	1.42838	0.986447	-0.469637	0.153458	0.464883	26	26	25	22.7	22.7	22	162.09	0	141.24	1740200000	143	1.25439	1.46865	1.12152	P70705;Q99NX2;D1MCF1;Q63675;D1GCS2;A0A096MJU5;D1GCS3;Q64535-3;Q64535-2	P70705			0.0556686	0.0339899	0.0755927
Atp2a2	Calcium-transporting ATPase;Sarcoplasmic/endoplasmic reticulum calcium ATPase 2	3	-1.13495	-1.151	-1.2275	0.644861	0.944175	1.49811	-0.269625	0.264784	0.431145	42	42	26	46.7	46.7	29.2	114.77	0	323.31	15864000000	753	1.63744	1.89284	1.53348	F1LPF6;P11507;E9PSX6;P11507-2;Q71UZ2;Q63080	F1LPF6;P11507;E9PSX6;P11507-2;Q71UZ2			0.0230441	0.0127985	0.0292766
Lyplal1		3	-1.09927	-1.28277	-0.972751	0.637856	1.09223	1.33845	-0.619717	0.368911	0.537068	5	5	5	29.4	29.4	29.4	26.069	0	56.155	256000000	26	1.30299	1.53817	1.18842	D3ZFS7;B2RYW5	D3ZFS7;B2RYW5			0.0497749	0.0289621	0.0648007
Dhrs7		3	-0.865018	-1.23202	-1.27525	0.518683	0.846553	1.62696	-0.393566	0.284904	0.488749	11	11	11	40	40	40	38.493	0	21.494	536170000	42	1.24865	1.49701	1.14877	D4A0T8	D4A0T8			0.0564092	0.0318412	0.0709954
Tomm70a	Mitochondrial import receptor subunit TOM70	3	-1.01157	-0.770838	-1.20341	1.22338	0.971879	1.29221	-0.777212	-0.1633	0.438861	24	24	24	44.8	44.8	44.8	67.444	0	130.92	2996500000	201	1.43036	1.51697	1.16799	Q75Q39;R9PXR4	Q75Q39;R9PXR4			0.0371227	0.030411	0.0679219
Hspe1	10 kDa heat shock protein, mitochondrial	3	-1.22204	-0.815573	-1.04372	1.15482	1.12784	1.33353	-0.535366	-0.201702	0.202202	9	9	9	76.5	76.5	76.5	10.902	0	28.359	20681000000	327	1.98353	2.05607	1.69383	P26772;P97601;A0A0G2JTG1	P26772;P97601;A0A0G2JTG1			0.0103865	0.00878881	0.0202381
S100a13		3	-1.02989	-1.09791	-0.9252	0.934621	0.961094	1.5202	-0.566117	-0.361311	0.564513	3	3	3	31.6	31.6	31.6	11.198	0	6.8	78624000	13	1.38145	1.49976	1.15142	D3ZTB5	D3ZTB5			0.041548	0.0316403	0.0705635
Gdpd1	Glycerophosphodiester phosphodiesterase domain-containing protein 1	3	-1.57892	-0.620728	-0.70316	0.918118	1.27028	1.31533	-0.642603	-0.0949995	0.136686	5	5	5	22.2	22.2	22.2	35.895	0	9.6867	251320000	24	1.36856	1.43257	1.08693	A0A0G2K8E7;Q0VGK4;A0A0G2K080	A0A0G2K8E7;Q0VGK4;A0A0G2K080			0.0427996	0.0369343	0.0818597
Gstp1	Glutathione S-transferase P	3	-1.09685	-0.941588	-1.26975	1.24852	1.17456	1.01816	-0.481465	0.0506643	0.297756	14	14	13	66.2	66.2	58.6	23.439	0	323.31	41790000000	857	1.95367	2.1152	1.75208	B6DYQ7;P04906;D4A8S2;A0A0G2K4Q5	B6DYQ7;P04906			0.0111258	0.00767008	0.0176978
Bdh1	D-beta-hydroxybutyrate dehydrogenase, mitochondrial	3	-1.53854	-0.653788	-0.949018	0.774394	1.26095	1.23247	-0.664427	0.198264	0.339697	12	12	12	42.7	42.7	42.7	38.333	0	51.968	766840000	48	1.26598	1.43284	1.08718	A0A0G2JSH2;P29147	A0A0G2JSH2;P29147			0.0542026	0.0369114	0.0818126
Echs1	Enoyl-CoA hydratase, mitochondrial	3	-1.42682	-1.03511	-0.994642	0.797035	1.10207	1.23608	-0.396315	0.594552	0.123151	12	12	12	63.8	63.8	63.8	31.516	0	132.49	3538500000	181	1.58097	1.82137	1.46354	P14604	P14604			0.026244	0.0150879	0.0343922
Dnm2	Dynamin-2	3	-1.26105	-0.958406	-1.16922	0.740157	1.17706	1.2873	0.0543745	-0.446147	0.575926	33	33	1	44.1	44.1	0.9	97.817	0	269.34	3858700000	244	1.55254	1.7719	1.41522	P39052-3;P39052-4	P39052-3;P39052-4			0.0280195	0.0169083	0.0384397
Nit1	Nitrilase homolog 1	3	-1.43413	-1.01236	-0.687241	0.803317	1.02438	1.51502	0.0319516	-0.582038	0.3411	18	18	18	93.5	93.5	93.5	32.033	0	323.31	8316300000	253	1.36287	1.51309	1.16425	F7ESM5;Q5PQK6;Q7TQ94	F7ESM5;Q5PQK6;Q7TQ94			0.0433641	0.0306839	0.0685094
Timm10b	Mitochondrial import inner membrane translocase subunit Tim10 B	3	-1.10206	-1.53407	-0.562157	0.740665	1.17549	1.27344	0.00393933	-0.528677	0.533432	4	4	4	48	48	48	11.657	0	7.1283	107100000	16	1.23634	1.42755	1.08212	A0A096MK46;Q9R1B1;F1LTU8	A0A096MK46;Q9R1B1			0.058031	0.0373637	0.0827713
Mtch2		3	-0.769948	-1.1675	-0.823141	0.688968	1.25284	1.60026	-0.314582	-0.759518	0.292626	13	13	13	58.4	58.4	58.4	33.528	0	208.59	5845400000	315	1.30808	1.32746	0.986677	B0BN52;A0A0G2K459;A0A0G2K7P7	B0BN52;A0A0G2K459;A0A0G2K7P7			0.0491949	0.0470479	0.103115
Naca		3	-0.72644	-1.11286	-1.17602	0.522963	1.40715	1.58465	-0.122533	-0.195514	-0.181392	38	38	38	26.4	26.4	26.4	220.19	0	192.65	10074000000	406	1.52634	1.61212	1.25989	M0R9L0;B2RYX0	M0R9L0			0.0297619	0.0244276	0.054968
Rhod		3	-0.736837	-1.38057	-0.850691	0.566279	1.50349	1.40733	0.0064256	-1.5749e-05	-0.515406	6	6	6	31	31	31	23.682	0	37.542	419590000	32	1.39009	1.47562	1.12821	D4ADM8	D4ADM8			0.0407296	0.0334488	0.0744372
Ldlr	Low-density lipoprotein receptor	3	-0.667837	-0.99603	-1.1143	0.848787	1.2887	1.59165	-0.0554385	-0.476377	-0.419154	29	29	29	39.9	39.9	39.9	96.648	0	304.51	5731300000	314	1.81893	1.77878	1.42194	G3V7A5;P35952;D3ZE75	G3V7A5;P35952			0.0151729	0.0166426	0.0378495
Atp6v1b2	V-type proton ATPase subunit B, brain isoform	3	-0.789469	-1.0906	-0.95658	0.590491	1.47974	1.47324	0.145	-0.725671	-0.126152	25	25	25	63	63	63	56.55	0	306.77	5164600000	364	1.37725	1.41453	1.06966	P62815;D3ZZS8	P62815			0.0419517	0.0385008	0.0851805
Coasy		3	-0.977808	-0.770235	-1.21131	0.385191	1.46215	1.50352	0.159788	-0.635531	0.084238	9	9	9	16.9	16.9	16.9	62.187	0	23.404	228190000	21	1.19032	1.30521	0.965576	Q5XIA5	Q5XIA5			0.0645179	0.0495211	0.108249
Myom2		4	-0.177739	-1.76326	-1.43934	0.977763	0.943625	0.909409	0.250076	0.0914651	0.207996	14	14	14	12.6	12.6	12.6	164.71	0	25.833	173060000	23	1.12652	1.3958	1.05176	G3V7K1;Q80UL0	G3V7K1			0.0747274	0.0401976	0.0887646
ttn		4	-0.20322	-1.57037	-1.68046	1.11432	0.852991	0.659435	0.345215	0.361766	0.120321	8	8	6	26.5	26.5	19.9	39.491	0	18.525	299000000	36	1.09263	1.39095	1.04713	Q9JHQ1	Q9JHQ1			0.0807923	0.040649	0.089716
Cav3	Caveolin-3	4	-0.295818	-1.43272	-1.79866	0.890473	0.937392	0.121364	0.665812	0.654724	0.257437	4	3	3	28.5	21.9	21.9	17.402	0	53.699	341790000	35	0.98768	1.32654	0.985806	P51638	P51638			0.102877	0.0471476	0.103322
Bnip3l		4	-0.392952	-1.45492	-1.71945	0.725862	0.745981	0.636663	0.995342	0.53626	-0.0727834	3	3	3	18.3	18.3	18.3	23.67	0	32.598	88658000	8	1.06214	1.40064	1.05638	Q8VBW4;Q4G086;Q66HQ4	Q8VBW4;Q4G086;Q66HQ4			0.0866682	0.0397521	0.0878254
Fxn	Frataxin, mitochondrial;Frataxin intermediate form;Frataxin mature form	4	-0.962553	-1.42496	-1.21904	0.692856	0.742097	0.938661	0.517514	1.1065	-0.391076	6	6	6	34	34	34	22.883	0	10.689	148560000	17	1.19405	1.52544	1.17615	M0RAK4;D3ZYW7;A0A0A0MXX7	M0RAK4;D3ZYW7;A0A0A0MXX7			0.0639661	0.0298236	0.0666577
Nbas		4	-0.730788	-1.56536	-1.22823	0.158297	0.317394	0.902141	1.14022	1.11999	-0.113655	50	50	50	27.8	27.8	27.8	265.8	0	256.67	2273400000	239	1.01246	1.3461	1.00439	F1M0U5	F1M0U5			0.0971717	0.0450713	0.0989943
Bcl2l13		4	-0.79627	-1.3588	-1.49888	0.778172	0.789757	0.673537	0.296785	1.22101	-0.105302	10	10	10	36.6	36.6	36.6	46.734	0	146.73	1515000000	91	1.23058	1.57212	1.22119	D3ZT71	D3ZT71			0.0588058	0.0267843	0.0600911
Naga	Alpha-N-acetylgalactosaminidase	4	-0.847917	-1.69048	-0.986058	0.428536	0.733633	0.751371	-0.0502826	1.456	0.205197	15	15	15	38.6	38.6	38.6	46.871	0	37.738	1839600000	128	0.981264	1.32044	0.98002	Q66H12	Q66H12			0.104409	0.0478145	0.104708
Irf3		4	-0.819295	-1.83839	-0.96395	1.21664	0.23513	0.664082	0.449105	0.904749	0.15193	5	5	5	16.4	16.4	16.4	47.278	0	45.987	200210000	23	1.1449	1.4877	1.13982	Q5XIB0	Q5XIB0			0.0716308	0.0325312	0.0724736
Npepl1		4	-0.827316	-1.50325	-1.09316	1.27708	0.328162	1.14311	0.596106	0.517634	-0.438367	11	11	11	48.5	48.5	48.5	43.682	0	178.49	1295800000	84	1.1249	1.40841	1.0638	D4A3E2	D4A3E2			0.0750067	0.0390472	0.0863376
Tmem38a	Trimeric intracellular cation channel type A	4	-0.865874	-1.42819	-1.23525	1.36879	-0.0428525	1.08945	0.738076	0.246996	0.128849	6	6	6	19.8	19.8	19.8	33.413	0	15.44	199690000	17	1.095	1.41655	1.07159	G3V9T4;A6ZIQ8;B1WBL7	G3V9T4;A6ZIQ8			0.0803526	0.0383222	0.0848028
Hsd17b10	3-hydroxyacyl-CoA dehydrogenase type-2	4	-1.62617	-0.724038	-1.05311	0.642096	1.35677	1.14606	-0.014939	-0.106366	0.379706	15	15	15	87.7	87.7	87.7	27.249	0	166.04	2990200000	174	1.4839	1.71492	1.3597	B0BMW2;O70351	B0BMW2;O70351			0.0328171	0.0192788	0.0436817
Tomm22	Mitochondrial import receptor subunit TOM22 homolog	4	-1.45328	-0.446937	-1.559	0.370449	1.20869	1.18893	0.36673	-0.00944139	0.333863	5	5	5	62.7	62.7	62.7	15.49	0	235.95	2469500000	123	1.18473	1.47059	1.12339	Q75Q41	Q75Q41			0.0653537	0.0338384	0.0752679
Nop56		4	-1.84154	-0.37523	-1.29224	0.238303	1.24238	0.745436	0.362326	0.251626	0.668943	27	27	27	52.7	52.7	52.7	65.399	0	230.99	4597000000	285	1.01083	1.34005	0.998638	Q4KLK7;Q5RJN5	Q4KLK7;Q5RJN5			0.0975371	0.0457036	0.100314
		4	-1.63569	-1.1299	-0.724072	0.425093	0.857661	1.31579	-0.168733	0.907976	0.151873	4	4	4	32.3	32.3	32.3	14.379	0	6.6328	298510000	33	1.12381	1.42846	1.08299	A0A0G2JW34;D3ZV37	A0A0G2JW34			0.0751952	0.0372855	0.0826057
Nipsnap1		4	-1.13541	-1.06473	-1.3125	0.259905	0.887613	1.16382	-0.464448	0.688745	0.977018	9	9	9	32.9	32.9	32.9	33.215	0	13.984	688780000	41	1.03824	1.36386	1.0213	Q5EBA4;G3V728	Q5EBA4;G3V728			0.0915714	0.0432653	0.0952138
Arhgap28		4	-1.215	-0.971993	-1.39082	0.214807	0.17765	1.64768	0.428115	0.717911	0.391647	4	4	4	6.6	6.6	6.6	81.644	0	4.4865	52931000	9	1.06597	1.40708	1.06254	F1M332;A0A0G2JWW2	F1M332;A0A0G2JWW2			0.0859073	0.039167	0.0865885
Stx12	Syntaxin-12	4	-1.45938	-0.78865	-1.28236	0.629602	0.433069	1.09313	-0.28429	0.400392	1.25849	11	11	11	52.3	52.3	52.3	32.483	0	119.7	1152100000	101	1.02194	1.35578	1.01361	A0A0G2JVB6;G3V7P1;A0A0G2K4U8	A0A0G2JVB6;G3V7P1;A0A0G2K4U8			0.0950736	0.0440778	0.0969148
Commd8		4	-1.23367	-0.851032	-1.44081	0.404364	0.339124	1.63747	-0.0294286	0.705462	0.468511	8	8	8	68.3	68.3	68.3	20.767	0	37.628	403140000	30	1.07734	1.4005	1.05625	B0K015	B0K015			0.0836874	0.0397649	0.0878517
Pgrmc2	Membrane-associated progesterone receptor component 2	4	-1.09124	-1.36744	-1.13372	-0.0231682	0.478221	1.45075	0.198875	1.03869	0.449035	12	11	11	59.9	55.8	55.8	23.403	0	131.87	1589600000	79	1.07365	1.41801	1.07299	Q5XIU9	Q5XIU9			0.0844015	0.0381935	0.0845298
Cd80		4	-1.18011	-1.02603	-1.39521	-0.0529984	0.721087	1.3627	0.0155765	0.67993	0.875057	6	6	6	22.4	22.4	22.4	32.691	0	19.257	399090000	41	1.09931	1.4425	1.09643	Q62680;A0A0G2K0F2;O35187;G3V671;O55202;Q62624	Q62680;A0A0G2K0F2;O35187;G3V671;O55202;Q62624			0.0795591	0.0360994	0.0800885
Ttn		4	-1.23831	-1.17269	-1.30829	-0.0380796	0.590289	1.40281	0.47177	0.691714	0.600788	21	11	11	22.9	10.4	10.4	120.44	0	16.84	273920000	27	1.30609	1.65926	1.3056	Q5VJM4;Q5VJM3;Q5VJM5;Q5VJK7	Q5VJM4;Q5VJM3;Q5VJM5			0.0494208	0.0219149	0.0494766
Ddb1	DNA damage-binding protein 1	4	-0.614723	-1.67532	-1.3646	0.385476	0.00763617	1.09351	0.578701	0.720466	0.868858	51	51	51	47.1	47.1	47.1	126.94	0	323.31	16359000000	642	1.21219	1.55624	1.20586	G3V8T4;Q9ESW0	G3V8T4;Q9ESW0			0.0613494	0.0277818	0.0622501
Me1	NADP-dependent malic enzyme;Malic enzyme	4	-0.751141	-1.67394	-1.36189	0.648351	0.268413	0.744997	1.07265	0.410062	0.642504	27	27	27	72.3	72.3	72.3	63.832	0	323.31	7573500000	436	1.50522	1.861	1.5023	A0A0G2K1S6;P13697;F1LQQ1	A0A0G2K1S6;P13697;F1LQQ1			0.031245	0.0137721	0.0314557
Nxn		4	-0.321655	-1.56647	-1.7198	0.669731	0.176972	0.696457	0.809138	0.4315	0.824128	14	14	14	52	52	52	41.052	0	106.01	1820000000	120	1.11434	1.45731	1.11064	D4A0M2	D4A0M2			0.0768529	0.0348891	0.0775104
Prkce	Protein kinase C epsilon type;Protein kinase C	4	-1.12645	-1.50553	-1.03144	0.224412	-0.110628	1.20865	0.87923	0.597145	0.86461	19	19	19	27.7	27.7	27.7	83.575	0	72.676	876800000	86	1.28269	1.62097	1.26846	Q6DUV1;P09216;F1LMV8;Q63432;R9PXS6;Q64617	Q6DUV1;P09216;F1LMV8			0.0521567	0.0239348	0.0538939
Casp3	Caspase-3;Caspase-3 subunit p17;Caspase-3 subunit p12	4	-1.39213	-1.46023	-0.677014	0.675206	-0.0449055	1.43649	0.789055	0.112608	0.56092	13	13	13	59.9	59.9	59.9	31.491	0	304.75	1808600000	134	1.0048	1.34129	0.999822	P55213	P55213			0.0989008	0.0455732	0.100041
Tdrp	Testis development-related protein	4	-1.56926	-1.27491	-0.910861	0.467486	0.265157	1.25599	0.741666	0.246922	0.777801	5	5	5	35.7	35.7	35.7	20.171	0	53.608	418820000	36	1.39379	1.74923	1.39312	B5DEK3;Q498E2	B5DEK3;Q498E2			0.0403841	0.0178144	0.0404464
Bnip2		4	-1.14888	-1.54462	-1.07675	0.52713	0.23614	1.35014	0.591879	0.357908	0.707043	5	5	5	17.8	17.8	17.8	38.323	0	24.608	92412000	18	1.45449	1.80921	1.45166	A0A0G2K1P3;D3ZGE0;Q1M168	A0A0G2K1P3;D3ZGE0			0.0351164	0.0155164	0.035346
Acly	ATP-citrate synthase	4	-1.2121	-1.29977	-1.12908	0.460248	0.214474	1.17206	0.648551	-0.0822491	1.22787	53	53	53	55.5	55.5	55.5	120.54	0	323.31	12672000000	623	1.14895	1.49715	1.14891	A0A0G2K5E7;G3V888;P16638;G3V9G4;P16638-2	A0A0G2K5E7;G3V888;P16638;G3V9G4;P16638-2			0.0709659	0.031831	0.0709725
Gmfb	Glia maturation factor beta	4	-1.46152	-1.4601	-0.558005	-0.224572	0.428459	0.714909	0.556772	0.579241	1.42481	13	13	12	76.8	76.8	76.8	16.736	0	126.35	2727500000	133	1.09191	1.39841	1.05425	Q63228;M0RDJ4	Q63228;M0RDJ4			0.0809264	0.0399567	0.0882572
Epb41l3		4	-1.28775	-1.57755	-0.692809	-0.347003	0.554435	1.06136	0.559685	0.795179	0.934448	34	30	3	44.1	40	4.3	96.951	0	253.38	3607100000	270	1.09208	1.42303	1.07779	A3E0T0	A3E0T0			0.0808947	0.0377546	0.0836007
Dak	Bifunctional ATP-dependent dihydroxyacetone kinase/FAD-AMP lyase (cyclizing);ATP-dependent dihydroxyacetone kinase;FAD-AMP lyase (cyclizing)	4	-0.928718	-1.77943	-0.932482	-0.159653	0.783451	0.668546	0.819487	0.468454	1.06035	19	19	19	48.4	48.4	48.4	59.443	0	112.36	1613600000	152	1.24292	1.57876	1.22761	Q4KLZ6	Q4KLZ6			0.0571584	0.0263779	0.0592093
Smyd1		4	-1.00788	-1.26668	-1.37779	-0.172621	0.879668	1.12176	0.659798	0.19009	0.973648	8	8	8	16.5	16.5	16.5	56.553	0	50.382	405280000	26	1.16876	1.51777	1.16876	D4A3D2	D4A3D2			0.0678016	0.030355	0.0678016
Nsfl1c	NSFL1 cofactor p47	4	-0.57549	-1.57578	-1.30815	-0.418846	0.418557	0.89243	0.671997	0.747932	1.14735	27	27	27	71.1	71.1	71.1	40.679	0	323.31	7439400000	345	1.06977	1.37354	1.03052	O35987;A0A0G2K911	O35987;A0A0G2K911			0.0851589	0.0423117	0.0932138
Erp29	Endoplasmic reticulum resident protein 29	4	-1.41467	-1.02906	-1.17823	-0.262501	1.07979	1.08418	0.829804	0.278039	0.612656	12	12	12	57.3	57.3	57.3	28.574	0	142.48	8043000000	265	1.11925	1.46582	1.1188	P52555	P52555			0.0759889	0.0342121	0.0760677
Zfp36l1	Zinc finger protein 36, C3H1 type-like 1	4	-1.66612	-0.983613	-0.894195	-0.155045	0.892134	0.661717	0.894651	0.0698367	1.18063	7	7	6	25.7	25.7	21.9	36.398	0	26.355	393450000	54	1.03737	1.37274	1.02976	P17431	P17431			0.0917551	0.0423897	0.093377
B2m	Beta-2-microglobulin	4	-1.38962	-1.25103	-1.07961	-0.19143	0.678501	1.17935	0.692724	0.531782	0.829337	6	6	6	50.4	50.4	50.4	13.72	0	30.964	2652000000	84	1.31987	1.67186	1.31783	P07151	P07151			0.0478773	0.0212883	0.0481028
Uckl1	Uridine-cytidine kinase	4	-1.66528	-0.970745	-0.81132	-0.381536	0.226977	0.849971	1.02272	0.576815	1.1524	18	18	18	45.1	45.1	45.1	60.826	0	134.62	1291400000	95	1.15768	1.44371	1.0976	D3ZYQ8	D3ZYQ8			0.0695537	0.035999	0.079873
Dync1h1	Cytoplasmic dynein 1 heavy chain 1	4	-1.60611	-1.12425	-0.785449	-0.0860771	0.583437	0.812813	1.36349	0.0227302	0.819421	266	266	266	65	65	65	532.04	0	323.31	124280000000	4809	1.01439	1.34507	1.00342	M0R9X8;F1LRT9;P38650;Q6LCG3	M0R9X8;F1LRT9;P38650			0.0967409	0.0451783	0.0992156
Tnnc1		4	-1.30632	-1.33154	-1.20797	0.425208	1.10471	0.691913	0.140983	0.565645	0.917376	8	8	8	55.3	55.3	55.3	18.42	0	97.532	4312100000	155	1.74977	2.10792	1.74491	Q4PP99	Q4PP99			0.0177922	0.00779974	0.0179924
Tmem205		4	-1.2712	-1.44556	-0.916857	0.0968716	1.29729	0.169305	0.452783	0.477129	1.14023	4	4	4	21.7	21.7	21.7	21.185	0	14.378	334780000	21	1.15641	1.50132	1.15292	D3ZJZ0	D3ZJZ0			0.0697574	0.0315268	0.0703202
Cd200	OX-2 membrane glycoprotein	4	-1.25067	-1.19286	-1.41234	0.35545	1.12404	0.617172	0.207694	0.795035	0.756483	6	6	6	24.5	24.5	24.5	31.088	0	18.892	1671600000	61	1.74749	2.10898	1.74594	P04218;A0A5D0	P04218;A0A5D0			0.0178859	0.00778072	0.0179498
Tubb3	Tubulin beta-3 chain	4	-1.01904	-0.946154	-1.63579	0.179954	1.07418	0.072697	0.36556	0.605	1.30359	19	4	4	50.9	16.9	16.9	50.418	0	34.287	501080000	40	1.15103	1.48657	1.13874	Q4QRB4	Q4QRB4			0.0706269	0.0326159	0.0726541
Klhl13		4	-0.578091	-1.47982	-1.62237	0.263556	1.10536	0.543832	0.369893	0.431161	0.966484	16	16	11	29.9	29.9	21.5	72.085	0	54.49	838610000	55	1.22284	1.57352	1.22255	F1LM44;Q3MHT7	F1LM44;Q3MHT7			0.0598632	0.0266981	0.0599032
Nt5dc2	5-nucleotidase domain-containing protein 2	4	-1.23235	-0.914398	-1.45931	-0.345632	1.03748	0.975337	0.522253	0.923174	0.49345	18	18	18	39.8	39.8	39.8	63.652	0	135.71	1225800000	94	1.09667	1.44169	1.09566	Q6Q0N3	Q6Q0N3			0.0800442	0.0361668	0.0802306
Epha2	Receptor protein-tyrosine kinase	4	-1.09069	-1.23984	-1.3977	0.057729	1.11565	0.202673	0.783651	1.08946	0.479065	32	32	30	35.4	35.4	33.5	108.74	0	143	5352800000	357	1.42957	1.77321	1.4165	D3ZBN3;Q5S255;F1LMX3;P29321	D3ZBN3			0.0371903	0.0168574	0.0383266
Pkp2		4	-1.16573	-1.09195	-1.50741	-0.0649145	0.817618	0.432327	0.640677	1.08311	0.856273	6	6	6	8.1	8.1	8.1	88.596	0	6.8116	199530000	8	1.70092	2.03589	1.67396	F1M7L9;Q562C0	F1M7L9;Q562C0			0.0199104	0.00920683	0.0211856
Ktn1		4	-1.58951	-1.08411	-1.05963	0.371386	0.465696	0.822249	0.378273	1.37873	0.316923	79	79	79	66	66	66	151.79	0	323.31	15946000000	852	1.35285	1.70548	1.35052	D4A4Z9	D4A4Z9			0.0443762	0.0197024	0.0446149
Cdc42ep4		4	-1.49861	-0.608478	-1.4604	0.0373794	0.824335	0.546096	0.543204	1.38721	0.229267	5	5	5	20	20	20	37.927	0	26.765	157600000	25	1.07239	1.40932	1.06467	B1WC33	B1WC33			0.0846467	0.0389655	0.0861648
Pck2		4	-1.21029	-0.886732	-1.4801	0.0635556	0.740779	0.456842	0.271273	1.58482	0.459848	30	30	30	59.7	59.7	59.7	73.271	0	323.31	4836900000	339	1.12773	1.4592	1.11245	B2RYG2;F1LQJ7;P07379	B2RYG2;F1LQJ7			0.0745195	0.0347376	0.077188
Cdkn2b	Cyclin-dependent kinase 4 inhibitor B	4	-1.15361	-1.10371	-1.40635	0.630764	-0.343091	0.58793	0.812473	1.00119	0.974406	6	6	6	57.4	57.4	57.4	12.92	0	63.915	342970000	40	1.60666	1.91482	1.55503	A0A0G2K864;Q5PQW4;P55272;P55272-2	A0A0G2K864;Q5PQW4;P55272;P55272-2			0.0247366	0.0121669	0.0278593
Park7	Protein deglycase DJ-1	4	-1.39219	-0.712037	-1.62387	1.02641	0.0753202	0.639157	0.367999	0.765819	0.853385	14	14	14	83.6	83.6	83.6	19.974	0	270.46	12683000000	413	1.32873	1.68223	1.32791	O88767;Q5BKC3	O88767;Q5BKC3			0.0469105	0.020786	0.0469991
Cdkn1a		4	-1.12121	-1.0542	-1.5459	-0.0380454	0.30805	0.516556	0.913294	1.03641	0.985045	6	6	6	39.6	39.6	39.6	18.318	0	16.144	485440000	36	2.12436	2.4251	2.05851	Q64315;Q2WFZ6	Q64315			0.00751	0.00375751	0.00873957
Gulp1	PTB domain-containing engulfment adapter protein 1	4	-1.49392	-0.759113	-1.5162	0.209255	0.431501	0.526922	0.76162	0.682584	1.15735	11	11	11	33.2	33.2	33.2	34.285	0	26.306	1019400000	73	1.73965	2.07364	1.71113	Q5PQS4;A0A0G2K2Q5;D3ZJ27;Q5PQS4-2	Q5PQS4;A0A0G2K2Q5;D3ZJ27;Q5PQS4-2			0.0182117	0.00844034	0.0194478
Itsn2		4	-1.7736	-0.271987	-1.45478	0.0961901	0.309066	0.619088	0.950543	0.529428	0.99605	20	17	17	15.4	13.5	13.5	195.57	0	46.863	385000000	48	1.0808	1.39558	1.05155	M0R7A6	M0R7A6			0.0830233	0.040218	0.0888076
Wars	Tryptophan--tRNA ligase, cytoplasmic;T1-TrpRS;T2-TrpRS	4	-0.798618	-1.30783	-1.55172	0.137036	0.650839	0.0348675	0.779934	0.828326	1.22717	28	28	28	71.6	71.6	71.6	53.426	0	323.31	11375000000	580	1.65176	1.95487	1.59433	F8WFH8;Q6P7B0;A0A0G2K673	F8WFH8;Q6P7B0;A0A0G2K673			0.0222967	0.0110951	0.025449
Adamts8		4	-1.22425	-0.868109	-1.63295	0.245821	0.245217	0.34346	0.827288	1.15237	0.911152	14	14	13	21.1	21.1	20.2	87.036	0	29.039	312400000	38	2.02689	2.33254	1.96681	D4AAT1	D4AAT1			0.00939961	0.00465008	0.0107942
Nnmt		4	-0.502585	-1.30251	-1.66414	-0.0307986	0.543284	0.0373067	0.680356	1.03478	1.20431	7	7	7	35.2	35.2	35.2	29.515	0	17.4	334920000	25	1.32514	1.5958	1.24409	D4A605	D4A605			0.0472999	0.025363	0.0570046
Csad	Cysteine sulfinic acid decarboxylase	4	-1.10183	-1.05246	-1.63473	0.250655	0.654754	0.206277	0.970773	0.661873	1.04469	11	11	11	27.6	27.6	27.6	55.214	0	39.471	244150000	34	1.93055	2.26137	1.89641	B3VPA7;Q64611;B5LSW7;A0A0G2K5P7;Q9QYW2;Q9R1F5;P70713	B3VPA7;Q64611;B5LSW7;A0A0G2K5P7			0.0117341	0.0054781	0.0126938
Abcd4		4	-1.48717	-0.840204	-1.31856	0.361613	0.187353	0.16123	0.548623	1.22342	1.1637	16	16	16	32.3	32.3	32.3	68.685	0	166.06	544950000	65	1.77058	2.06197	1.69963	D4A576;Q5FWT4	D4A576			0.0169598	0.00867022	0.0199696
Sdpr	Serum deprivation-response protein	4	-1.03922	-1.35631	-1.21829	-0.239367	0.286328	0.538248	1.08467	0.746947	1.197	18	18	18	61.9	61.9	61.9	46.386	0	246.16	10529000000	335	1.83942	2.11603	1.75289	Q66H98	Q66H98			0.0144737	0.00765544	0.0176649
Npr3	Atrial natriuretic peptide receptor 3	4	-1.3583	-1.17348	-1.14009	-0.0288874	0.419552	0.178889	0.92533	0.941032	1.23594	23	23	23	44.1	44.1	44.1	59.727	0	117.84	2616700000	150	2.43791	2.71306	2.34445	P41740;Q63254	P41740;Q63254			0.0036483	0.00193615	0.00452429
Mllt4	Afadin	4	-1.12765	-1.29116	-1.15128	-0.174429	0.607478	-0.00547861	0.878597	1.16156	1.10237	42	42	42	28.5	28.5	28.5	207.68	0	263.42	2098000000	180	1.95364	2.20939	1.84503	O35889;O35889-2;F1LT10	O35889;O35889-2;F1LT10			0.0111265	0.00617462	0.014288
TSN3		4	-1.1184	-1.51453	-1.08765	0.0682236	0.504087	0.217134	0.803621	0.894143	1.23337	38	34	2	37.2	35.1	2.4	155.81	0	323.31	2803800000	207	2.10887	2.4099	2.04344	C5NTX8;B1H276	C5NTX8			0.00778269	0.00389135	0.00904815
Hmcn1		4	-1.48577	-1.09969	-1.09002	-0.213405	0.929943	0.381359	0.852952	0.612751	1.11188	69	69	69	15.9	15.9	15.9	611.55	0	323.31	3267400000	254	1.43752	1.76358	1.40711	F1M4Q3;A0A096MJ40;A0A096MJ21;A0A096MJJ2	F1M4Q3;A0A096MJ40			0.0365157	0.0172353	0.0391643
Palmd	Palmdelphin	4	-1.05062	-1.34043	-1.46687	0.546483	0.481926	0.15599	0.946031	0.811685	0.915805	21	21	21	50.3	50.3	50.3	62.418	0	320.86	2970200000	206	2.44116	2.77931	2.41035	Q4KM62;A0A0G2JZ34	Q4KM62;A0A0G2JZ34			0.0036211	0.00166223	0.00388732
Col11a1	Collagen alpha-1(XI) chain	4	-1.07025	-1.20996	-1.44997	0.400414	0.292728	0.0175575	1.04465	1.00404	0.9708	44	44	40	35.5	35.5	33.8	181.02	0	323.31	8351700000	444	2.57138	2.86405	2.49469	P20909;P20909-3;P20909-2;P20909-4;P20909-6;P20909-5;O70605	P20909;P20909-3;P20909-2;P20909-4;P20909-6;P20909-5			0.002683	0.00136757	0.00320118
Slit2	Slit homolog 2 protein	4	-0.840205	-1.398	-1.49546	0.447869	0.631823	-0.0128848	0.739724	0.740915	1.18623	38	38	6	34.3	34.3	4.8	169.08	0	127.3	1361200000	139	1.684	2.00979	1.64829	F1MA79;Q9WVC1	F1MA79;Q9WVC1			0.0207014	0.0097771	0.0224755
Lima1		4	-1.26535	-1.20657	-1.28407	0.377304	0.201536	0.214738	1.15596	0.682666	1.12378	48	48	47	68.5	68.5	67.5	83.796	0	323.31	58603000000	1275	2.53911	2.84118	2.47192	F1LR10;Q6J4T4	F1LR10			0.00288995	0.00144152	0.00337349
Sptan1	Spectrin alpha chain, non-erythrocytic 1	4	-1.32551	-1.26017	-1.27742	0.668173	0.32908	0.200469	1.08351	0.75152	0.830352	173	173	3	73.2	73.2	1.7	284.63	0	323.31	65475000000	2757	2.47455	2.81376	2.44464	E9PSZ3;P16086;A0A0G2K1E7;Q6IRK8;A0A0G2JZ69	E9PSZ3;P16086;A0A0G2K1E7;Q6IRK8;A0A0G2JZ69			0.00335313	0.00153547	0.0035922
LOC100911356		4	-1.11935	-1.28927	-1.39496	0.688843	0.831004	-0.0725245	0.796794	0.537058	1.0224	14	14	1	75.4	75.4	5.8	31.861	0	323.31	4551700000	207	1.65695	2.00709	1.64564	A0A0G2JY69;G3V907	A0A0G2JY69;G3V907			0.0220318	0.00983807	0.0226131
Rbms1	RNA-binding motif, single-stranded-interacting protein 1	4	-1.28423	-1.11075	-1.26425	0.560703	0.114614	-0.0816287	1.00039	0.872469	1.19269	10	7	6	40.2	33.7	30	43.775	0	127.97	1042400000	126	2.16854	2.44662	2.07985	A0A0G2K4R7;Q5PQP1	A0A0G2K4R7;Q5PQP1			0.0067836	0.00357586	0.00832051
Celf2	CUGBP Elav-like family member 2	4	-1.09591	-1.5042	-1.147	0.439648	0.150647	0.366854	0.949977	0.549222	1.29077	12	12	11	27.7	27.7	25.7	53.926	0	120.44	1826200000	124	1.92023	2.23766	1.87297	Z4YNP1;Q792H5-2;Q792H5-3;Q792H5;Q792H5-4	Z4YNP1;Q792H5-2;Q792H5-3;Q792H5;Q792H5-4			0.0120163	0.00578549	0.0133977
Nudcd3		4	-1.10609	-1.53089	-1.2264	0.430779	0.207584	0.634718	0.833334	1.05085	0.706116	15	15	15	62.2	62.2	62.2	33.15	0	160.95	2316300000	143	2.26309	2.60708	2.23911	Q32PY7;A0A0G2K226	Q32PY7			0.00545645	0.00247127	0.0057662
		4	-1.24321	-1.41305	-1.28804	0.410327	0.480849	0.557899	0.877422	0.740569	0.877231	320	320	1	54.9	54.9	0.2	835.1	0	323.31	32656000000	2286	3.47042	3.82696	3.4554	A0A0G2K9T4	A0A0G2K9T4			0.000338517	0.00014895	0.000350429
Sptbn1		4	-1.32789	-1.20082	-1.36129	0.293897	0.411648	0.564525	0.892525	0.665556	1.06185	142	142	131	70.5	70.5	65.4	273.31	0	323.31	60769000000	2354	2.6825	3.02728	2.65729	G3V6S0;Q6XD99;A0A0G2K8W9;A0A0G2JZY6;Q5D002;Q99MI4;Q6XDA0	G3V6S0;Q6XD99;A0A0G2K8W9;A0A0G2JZY6			0.0020773	0.000939118	0.00220146
Mylk		4	-1.22908	-1.47482	-1.18116	0.415352	0.25113	0.544156	0.923665	0.846219	0.904539	77	77	77	47.5	47.5	47.5	214	0	323.31	12431000000	731	2.88099	3.22181	2.85124	A0A0G2K0Q7;D3ZFU9	A0A0G2K0Q7;D3ZFU9			0.00131526	0.000600054	0.00140851
Cobl	Protein cordon-bleu	4	-0.986385	-1.25505	-1.47959	0.240097	0.042649	0.511687	0.787249	0.940778	1.19857	12	12	12	11.3	11.3	11.3	144.03	0	14.536	464250000	29	2.0984	2.39994	2.03358	A0A0G2K2Q1;D3ZUI5	A0A0G2K2Q1;D3ZUI5			0.0079726	0.00398162	0.00925593
Timm10	Mitochondrial import inner membrane translocase subunit Tim10	4	-1.52574	-1.28655	-0.87498	0.701497	0.32983	0.498811	1.43853	0.166885	0.551725	5	5	5	40	40	40	10.333	0	8.9858	861350000	25	1.27129	1.61836	1.26593	P62074	P62074			0.0535439	0.0240791	0.0542088
Otud4		4	-1.29255	-1.57807	-0.646903	1.0578	0.481881	0.0159533	1.31325	0.0653428	0.5833	9	9	9	11.7	11.7	11.7	122.72	0	13.966	119420000	15	0.976809	1.31469	0.974565	F1M7Q7;Q498M3;Q5XI11	F1M7Q7			0.105485	0.0484518	0.106032
Got1	Aspartate aminotransferase, cytoplasmic	4	-1.51241	-1.26613	-1.01936	0.923541	0.269368	0.764798	0.964724	0.0869332	0.788536	26	26	26	76	76	76	46.428	0	323.31	15513000000	501	1.51177	1.87048	1.51158	P13221	P13221			0.0307773	0.0134747	0.0307907
Msi2		4	-1.93426	-1.257	-0.349446	0.251379	0.945723	0.268337	0.748488	0.871358	0.455417	7	7	6	31.7	31.7	27.3	29.787	0	44.757	1503400000	67	1.02066	1.35787	1.0156	F1LWE6	F1LWE6			0.0953542	0.0438662	0.0964717
Triobp		4	-1.514	-1.50073	-0.772997	0.211863	0.527629	0.573272	0.911054	1.05877	0.505142	35	34	33	67.2	65.7	64.5	66.962	0	147.69	2850000000	191	1.68584	2.02906	1.66724	A2TIS7;A0A0G2K6B2;B5DFF5;A0A0G2K1P8;A2TIS8;Q5M7V4	A2TIS7;A0A0G2K6B2;B5DFF5;A0A0G2K1P8;A2TIS8;Q5M7V4			0.0206139	0.00935276	0.0215159
Habp4		4	-1.50334	-1.50549	-0.758741	0.615864	0.660405	0.448181	0.751079	1.13728	0.154759	9	9	9	28.7	28.7	28.7	45.826	0	21.817	205260000	25	1.43365	1.78937	1.43227	A1L1K8	A1L1K8			0.0368426	0.0162416	0.0369598
Cda		4	-1.26011	-1.88865	-0.587095	0.777905	0.747966	0.656841	0.763189	0.32439	0.46556	3	3	3	31.5	31.5	31.5	16.109	0	19.132	226400000	22	1.38418	1.73452	1.37878	D4AC20	D4AC20			0.0412876	0.0184281	0.0418042
Kank2		4	-1.48732	-1.70024	-0.45699	0.108415	0.827327	0.783096	0.894678	0.668508	0.362521	34	34	33	50.4	50.4	49.5	90.221	0	254.58	3060300000	216	1.15841	1.50641	1.15782	D4ACC2;D3ZD05	D4ACC2;D3ZD05			0.0694368	0.0311595	0.0695312
Xirp1		4	-1.21178	-1.7311	-0.74857	0.378161	0.597789	1.30495	0.617794	0.590503	0.202253	31	31	31	35.9	35.9	35.9	125.77	0	201.94	2488700000	205	1.31646	1.65978	1.3061	D4ABA9	D4ABA9			0.0482547	0.0218887	0.0494197
Mpi	Mannose-6-phosphate isomerase	4	-1.0475	-1.03289	-1.47637	0.116137	0.71612	1.00272	1.11028	-0.287876	0.89937	14	14	14	41.6	41.6	41.6	46.423	0	112.46	900000000	87	1.01954	1.36183	1.01937	Q68FX1	Q68FX1			0.0956005	0.043468	0.0956379
Tkt	Transketolase	4	-0.955813	-1.29849	-1.48957	0.350986	1.026	1.14224	0.45959	0.0686242	0.696431	30	30	1	62.9	62.9	1.8	67.643	0	323.31	31353000000	776	1.57556	1.91215	1.55241	P50137	P50137			0.026573	0.0122419	0.0280279
Cnn3	Calponin-3	4	-1.11084	-1.20982	-1.36262	0.375692	0.633833	1.41493	0.52379	-0.0545131	0.789556	20	20	18	71.8	71.8	66.1	36.434	0	323.31	27300000000	758	1.361	1.69703	1.3423	P37397	P37397			0.0435512	0.0200895	0.0454674
Alad	Delta-aminolevulinic acid dehydratase	4	-0.826365	-1.39797	-1.50875	0.205091	0.962675	0.744383	0.723087	0.0809025	1.01694	15	15	15	62.1	62.1	62.1	36.031	0	212.22	1811000000	101	1.33496	1.68937	1.33485	P06214	P06214			0.0462424	0.020447	0.0462541
Npepps		4	-1.06735	-1.25344	-1.49094	0.202762	0.820174	1.10833	0.714956	0.211363	0.754146	47	47	47	57.7	57.7	57.7	103.34	0	323.31	11951000000	596	1.58559	1.94316	1.58283	F1M9V7;Q8VID2;Q3B8Q9	F1M9V7			0.0259663	0.0113983	0.0261318
Ubfd1		4	-1.03424	-1.20723	-1.43076	0.252185	0.895056	0.817028	0.554243	-0.101714	1.25543	10	10	10	44	44	44	31.021	0	72.962	1784100000	115	1.21113	1.56078	1.21024	Q3MIF1;G3V8E4	Q3MIF1;G3V8E4			0.0614993	0.0274929	0.0616254
Ttc37		4	-0.958539	-0.922121	-1.39437	0.199352	1.42408	1.34612	-0.292444	0.0319877	0.56594	32	32	32	24.8	24.8	24.8	174.29	0	98.644	1414700000	144	1.1107	1.34828	1.00647	D3ZL50	D3ZL50			0.0774997	0.0448456	0.0985213
Phb	Prohibitin	4	-0.866511	-1.21091	-1.44857	0.309441	1.40464	1.05602	-0.200557	0.43997	0.516471	21	21	21	83.5	83.5	83.5	29.82	0	274.32	9867800000	351	1.28811	1.58184	1.23058	P67779;D3ZFH6	P67779			0.0515098	0.0261915	0.0588058
Gpi	Glucose-6-phosphate isomerase	4	-0.971432	-1.11404	-1.48417	0.328282	1.28738	1.25386	0.325009	-0.0351282	0.410246	26	26	26	57.2	57.2	57.2	62.826	0	323.31	23058000000	650	1.4648	1.7538	1.39757	Q6P6V0;CON__Q3ZBD7	Q6P6V0			0.0342926	0.0176279	0.0400341
Vsnl1	Visinin-like protein 1	4	-0.757641	-1.4114	-1.28518	0.219077	1.52861	0.991988	0.32164	-0.144813	0.537716	5	5	5	31.4	31.4	31.4	22.17	0	6.6501	189210000	17	1.15882	1.44688	1.10063	Q56A29;P62762	Q56A29;P62762			0.0693713	0.0357372	0.0793177
Nfu1		4	-0.548231	-1.41595	-1.50452	0.253375	1.3577	1.15927	0.148988	0.218194	0.331176	6	6	6	29.6	29.6	29.6	28.367	0	19.069	597160000	35	1.19969	1.48648	1.13865	D3ZA85	D3ZA85			0.0631408	0.0326227	0.0726691
Mtap	S-methyl-5-thioadenosine phosphorylase	4	-1.34893	-0.876559	-1.24274	0.0422807	1.12521	1.28233	0.203653	-0.13206	0.946825	21	21	21	82.7	82.7	82.7	31.089	0	192.7	5500900000	291	1.0307	1.34388	1.00228	A0A0G2K583;Q7TP15	A0A0G2K583;Q7TP15			0.0931751	0.0453023	0.0994764
Htra2		4	-1.05931	-1.31676	-1.35973	0.130755	1.27612	1.01837	0.366378	0.344621	0.599561	7	7	7	19.4	19.4	19.4	49.094	0	45.863	480790000	48	1.48806	1.82898	1.47098	B0BNB9;A0A0G2JZB1;D3ZKF5	B0BNB9			0.0325042	0.0148259	0.033808
Abca1		4	-0.878741	-1.4476	-1.14816	0.193611	1.04837	1.52844	0.0124021	0.120081	0.571601	12	12	11	6	6	5.7	253.99	0	21.547	266670000	31	1.20808	1.49557	1.14739	F1LNL3;Q80ZB2	F1LNL3;Q80ZB2			0.0619327	0.031947	0.0712213
Vps13a		4	-0.66793	-1.53133	-1.32565	0.201048	0.991008	1.37107	0.233588	0.0253431	0.702857	21	21	20	10.8	10.8	10.5	266.49	0	41.933	515430000	74	1.15427	1.4655	1.1185	D4A899	D4A899			0.0701019	0.0342373	0.0761202
		4	-0.750251	-1.57202	-1.23097	0.37597	1.00026	1.33873	0.120385	0.00941594	0.70847	12	12	12	25.3	25.3	25.3	70.994	0	69.362	642190000	52	1.2924	1.59442	1.24275	D4A8Y1	D4A8Y1			0.0510035	0.0254437	0.0571808
		4	-0.932835	-1.49911	-1.39244	0.661359	1.00421	1.03761	0.338438	0.402088	0.380675	43	43	2	12.2	12.2	0.2	874.74	0	107.88	967710000	111	2.20775	2.54037	2.17286	A0A0G2K8N1;A0A0G2K3P4	A0A0G2K8N1;A0A0G2K3P4			0.00619798	0.00288158	0.00671645
Rnf14		4	-0.725371	-1.69468	-1.18274	0.437306	0.939173	1.3351	0.10405	0.508946	0.27821	13	13	13	35.9	35.9	35.9	54.106	0	270.08	596270000	69	1.38281	1.69077	1.33621	Q3ZAU6;B2GV23	Q3ZAU6;B2GV23			0.0414181	0.0203812	0.0461095
Hibadh	3-hydroxyisobutyrate dehydrogenase, mitochondrial	4	-1.36422	-1.22344	-1.05191	0.549993	1.14442	1.34148	0.187396	0.240314	0.175968	12	12	12	53.4	53.4	53.4	35.302	0	288.39	4852900000	213	1.96666	2.24577	1.88098	P29266	P29266			0.0107979	0.00567845	0.0131529
Tpk1		4	-1.25673	-1.15528	-1.18007	0.412543	0.788544	1.58381	0.435658	-0.0732128	0.444728	4	4	4	25.1	25.1	25.1	27.207	0	16.35	222930000	25	1.42574	1.72588	1.37037	B5DEJ6	B5DEJ6			0.0375198	0.0187984	0.0426216
LOC679794;Cycs	Cytochrome c, somatic	4	-1.19551	-1.56769	-0.821871	0.324614	0.748376	1.53031	0.193816	0.191068	0.596887	10	10	5	71.4	71.4	39	11.635	0	140.54	14952000000	217	1.2719	1.58661	1.23521	D4A5L9;P62898;P10715;D3ZXV2;D3ZS15	D4A5L9;P62898			0.0534687	0.0259054	0.0581822
Igfbp5	Insulin-like growth factor-binding protein 5	4	-1.56155	-1.04281	-1.0835	0.786338	1.01952	1.17221	0.389782	-0.0205576	0.34056	8	8	8	26.6	26.6	26.6	30.307	0	20.946	619790000	49	2.05292	2.3449	1.97906	A0A0G2JVW1;P24594	A0A0G2JVW1;P24594			0.00885279	0.0045196	0.010494
	Uncharacterized protein C17orf62 homolog	4	-1.45136	-1.17784	-0.996722	0.644758	1.19762	1.20115	0.023077	0.102036	0.457279	7	7	7	29.9	29.9	29.9	20.894	0	13.893	868550000	53	1.92469	2.20107	1.83681	Q6AYA6	Q6AYA6			0.0118935	0.00629405	0.014561
Mapre3	Microtubule-associated protein RP/EB family member 3	4	-1.36949	-1.37657	-1.1249	0.347075	0.981312	1.04365	0.568298	0.33203	0.59859	14	12	11	61.6	58	54.4	31.966	0	135.72	2532400000	142	1.9836	2.33896	1.97317	Q5XIT1	Q5XIT1			0.0103848	0.00458184	0.0106373
Impact	Protein IMPACT	4	-1.25163	-1.44581	-0.84794	-0.0197942	1.20447	1.20878	0.158806	0.185587	0.807526	15	15	15	55.8	55.8	55.8	35.995	0	163.27	1782600000	127	1.10889	1.4333	1.08763	Q5GFD9	Q5GFD9			0.0778234	0.0368723	0.0817278
Ston1		4	-1.26188	-1.41298	-1.15369	0.234545	1.05504	1.04565	0.49751	0.303858	0.691943	14	14	14	21.8	21.8	21.8	81.931	0	74.284	911810000	88	1.74059	2.09371	1.7309	F1MAC6;Q7TNJ9	F1MAC6;Q7TNJ9			0.0181723	0.00805916	0.0185823
Tceal5;Tceal6		4	-1.34851	-1.32339	-1.21731	0.294568	0.863394	1.11303	0.492014	0.540789	0.585421	10	10	10	38.5	38.5	38.5	22.021	0	71.845	907660000	104	2.00944	2.36972	2.00363	M0RDJ7;M0RBL8	M0RDJ7;M0RBL8			0.00978498	0.00426855	0.00991676
Pygb	Alpha-1,4 glucan phosphorylase	4	-1.06196	-1.24964	-1.21842	0.156744	0.849323	1.42986	1.00442	0.151556	-0.0618799	47	47	2	63	63	2.2	96.774	0	323.31	10915000000	607	1.10394	1.42432	1.07903	G3V6Y6	G3V6Y6			0.0787155	0.0376426	0.0833624
App	Amyloid beta A4 protein;N-APP;Soluble APP-alpha;Soluble APP-beta;C99;Beta-amyloid protein 42;Beta-amyloid protein 40;C83;P3(42);P3(40);C80;Gamma-secretase C-terminal fragment 59;Gamma-secretase C-terminal fragment 57;Gamma-secretase C-terminal fragment 50;C31	4	-0.820745	-1.11945	-1.43569	0.403209	1.30882	1.34788	0.419439	0.211307	-0.314772	19	19	18	30.6	30.6	29.6	86.703	0	164.85	2719000000	181	1.3248	1.56431	1.21365	P08592;Q6P6Q5;P08592-2	P08592;Q6P6Q5;P08592-2			0.0473369	0.0272703	0.0611435
Tmod1	Tropomodulin-1	4	-1.08924	-1.3253	-1.42549	0.533427	1.1973	0.627728	0.777181	0.526742	0.177645	9	8	8	42.9	40.7	40.7	40.454	0	60.305	212440000	25	1.80753	2.16076	1.79701	Q6IMZ5;P70567	Q6IMZ5;P70567			0.0155765	0.00690621	0.0159584
Ehd1	EH domain-containing protein 1	4	-0.906152	-0.889805	-1.70713	0.319175	1.43135	0.649775	0.771014	0.519801	-0.188032	27	23	15	64.4	57.7	42.5	60.602	0	213.98	2629900000	182	1.05516	1.37499	1.0319	Q641Z6	Q641Z6			0.0880724	0.0421706	0.092918
Hexa	Beta-hexosaminidase subunit alpha	4	-1.2413	-1.21612	-1.32963	0.177154	1.33977	0.743902	0.63749	0.569346	0.319382	17	17	17	44.7	44.7	44.7	60.537	0	180.56	3175000000	195	1.5515	1.9037	1.54413	Q641X3	Q641X3			0.0280867	0.0124825	0.0285674
Sgcd		4	-1.11111	-1.04316	-1.49675	0.0271188	1.26123	0.943778	0.0763009	0.825747	0.516853	5	5	5	18.7	18.7	18.7	32.087	0	9.119	105630000	15	1.22255	1.56417	1.21351	F1LYS7	F1LYS7			0.0599032	0.0272791	0.0611632
Pag1	Phosphoprotein associated with glycosphingolipid-enriched microdomains 1	4	-1.09692	-1.22339	-1.484	0.391414	1.25416	0.930434	0.441612	0.421347	0.365339	9	9	9	31.9	31.9	31.9	44.39	0	72.986	346990000	39	1.85919	2.19829	1.83406	A0A0G2K0M5;Q9JM80	A0A0G2K0M5;Q9JM80			0.0138296	0.00633447	0.0146535
Hsd17b8	Estradiol 17-beta-dehydrogenase 8	4	-0.975437	-0.937838	-1.67848	0.452636	1.44563	0.848623	0.204976	0.532175	0.107715	5	5	5	28.7	28.7	28.7	26.893	0	33.402	203330000	21	1.3903	1.69391	1.33926	A0A0G2K6P1;Q6MGB5;Q5BJM1	A0A0G2K6P1;Q6MGB5			0.0407099	0.0202344	0.0457868
Mb	Myoglobin	4	-0.927378	-1.07497	-1.80874	0.870125	0.509121	0.868344	0.607101	0.236761	0.71964	6	6	6	57.1	57.1	57.1	17.157	0	72.714	1309500000	55	1.62553	1.98014	1.61915	Q9QZ76	Q9QZ76			0.0236848	0.0104679	0.0240353
Snx17	Sorting nexin-17	4	-0.805882	-0.789653	-1.90246	1.1482	0.684792	0.679232	0.872692	-0.156774	0.269859	9	9	9	26.6	26.6	26.6	52.882	0	27.436	268260000	45	1.09325	1.4053	1.06084	Q6AYS6;A0A0G2JXV4;F1LMM2	Q6AYS6;A0A0G2JXV4			0.080677	0.0393278	0.0869281
Cd2ap	CD2-associated protein	4	-0.86959	-0.713906	-2.05311	0.814904	0.767199	0.629564	0.827492	0.240967	0.356479	13	13	13	27.3	27.3	27.3	70.49	0	30.882	536420000	50	1.19159	1.53269	1.18313	A0A0A0MXX0;F1LRS8;Q80ZE7	A0A0A0MXX0;F1LRS8;Q80ZE7			0.0643295	0.0293299	0.0655949
Adipor1		4	-0.901689	-1.17233	-1.75015	0.77484	0.569917	0.840137	0.35041	0.357047	0.931819	4	4	4	15.2	15.2	15.2	42.466	0	76.428	100790000	28	1.64716	2.00452	1.6431	Q6P746;Q3YAF8;G3V6I6	Q6P746;Q3YAF8;G3V6I6			0.0225341	0.00989646	0.0227457
Dhcr7	7-dehydrocholesterol reductase	4	-1.13754	-1.14111	-1.28957	0.981498	1.31781	0.733812	0.550518	-0.323344	0.307927	5	5	5	10.8	10.8	10.8	54.154	0	15.639	580540000	34	1.69408	1.96407	1.60336	Q9Z2Z8	Q9Z2Z8			0.0202265	0.0108625	0.0249253
Tnnt1	Troponin T, slow skeletal muscle	4	-1.32197	-1.17172	-0.923628	1.27685	1.22211	0.288533	0.855476	-0.288791	0.0631357	6	2	2	16.9	9.2	9.2	30.977	0	4.5399	203070000	8	1.14244	1.42113	1.07598	Z4YP12;Q7TNB2-3;Q7TNB2-4;Q7TNB2-2;Q7TNB2	Z4YP12;Q7TNB2-3;Q7TNB2-4;Q7TNB2-2;Q7TNB2			0.0720377	0.0379201	0.0839499
Rfk		4	-1.03968	-1.26388	-1.34677	0.81255	1.19994	0.897584	0.683644	-0.229723	0.286339	8	8	8	63.2	63.2	63.2	17.481	0	61.75	965390000	76	1.74072	2.03538	1.67346	Q6AYA7	Q6AYA7			0.0181669	0.00921765	0.02121
Crk	Adapter molecule crk	4	-0.971911	-1.29186	-1.20633	1.19697	1.19751	0.817002	0.353797	-0.413187	0.318011	16	16	16	59.2	59.2	59.2	33.844	0	82.593	2038300000	157	1.77316	2.00397	1.64257	Q63768;Q63768-2	Q63768;Q63768-2			0.0168593	0.009909	0.0227735
Blvrb		4	-0.471289	-1.63407	-1.39744	0.728986	1.14183	0.629786	0.685303	-0.290543	0.607442	13	13	13	87.4	87.4	87.4	22.094	0	323.31	18331000000	452	1.09442	1.40779	1.06321	B5DF65	B5DF65			0.08046	0.039103	0.086455
Cap2	Adenylyl cyclase-associated protein 2	4	-0.703686	-1.24947	-1.55591	0.957047	1.15713	0.59925	0.944692	-0.0231823	-0.125878	22	21	21	56.6	54.9	54.9	52.912	0	87.022	2714400000	149	1.21964	1.51668	1.16771	P52481	P52481			0.0603059	0.0304313	0.0679657
Ahcyl1	Adenosylhomocysteinase	4	-1.20104	-1.2499	-1.32394	1.38145	0.608267	0.217589	0.395354	0.394639	0.777582	20	20	11	55.3	55.3	36.9	53.753	0	211.9	4204500000	232	1.49439	1.84722	1.48882	B5DFN2	B5DFN2			0.0320339	0.0142161	0.0324474
Pawr	PRKC apoptosis WT1 regulator protein	4	-1.19108	-1.31505	-1.31701	1.21627	0.523073	0.207587	0.761742	0.312112	0.80236	21	21	21	74.1	74.1	74.1	35.853	0	323.31	6842900000	300	1.59546	1.95595	1.59539	G3V6S1;Q62627	G3V6S1;Q62627			0.0253828	0.0110675	0.0253869
Hsp90ab1	Heat shock protein HSP 90-beta	4	-0.938901	-1.58021	-1.124	1.18155	0.801866	0.398661	0.332919	-0.0920314	1.02016	50	50	37	74.2	74.2	59.1	83.28	0	323.31	176800000000	2915	1.26111	1.59552	1.24382	P34058;A0A0G2K793	P34058;A0A0G2K793			0.0548138	0.0253793	0.0570401
Sik3		4	-1.44893	-1.41323	-0.974771	0.770728	0.842725	0.406174	0.594947	0.173577	1.04878	13	13	13	11.9	11.9	11.9	145.99	0	34.365	454310000	46	1.65339	2.01441	1.65283	M0RD40;B2GV43	M0RD40			0.0222131	0.00967364	0.0222418
Rras2		4	-1.16973	-1.11648	-1.3715	0.78076	1.12593	0.267525	0.514153	-0.156106	1.12544	10	8	8	53.9	40.7	40.7	23.399	0	54.606	3336600000	115	1.2192	1.56332	1.21269	Q5BJU0;A0A0G2K508	Q5BJU0;A0A0G2K508			0.0603671	0.0273325	0.0612788
Ndrg3	Protein NDRG3	4	-1.40766	-1.19155	-1.06802	1.27972	0.0229685	0.261853	0.934508	0.896827	0.271357	12	12	12	42.7	42.7	42.7	41.506	0	71.059	414770000	56	1.22114	1.56799	1.2172	Q6AYR2;D4ACZ5	Q6AYR2;D4ACZ5			0.060098	0.0270402	0.0606457
Nol3	Nucleolar protein 3	4	-1.41191	-1.1678	-1.15503	1.03229	0.268892	0.754676	0.888486	0.894908	-0.104516	9	9	9	62.4	62.4	62.4	24.491	0	111.37	1238300000	93	1.35322	1.70628	1.35129	G3V7Z3;Q62881;Q62882	G3V7Z3;Q62881			0.0443384	0.0196662	0.0445359
Bcl2l1;Bcl2l1-ps1	Bcl-2-like protein 1	4	-1.27358	-1.45153	-1.10664	0.929759	0.198447	0.816243	0.779822	0.910771	0.196708	5	5	5	28	28	28	25.839	0	49.31	260390000	29	1.627	1.98808	1.62695	A0A0G2JZS5;Q7TS62;P53563-3;P53563;Q9WUI5;Q548R7;E9PU78;P53563-2;Q5K547	A0A0G2JZS5;Q7TS62;P53563-3;P53563;Q9WUI5;Q548R7;E9PU78;P53563-2			0.0236048	0.0102783	0.0236075
Pml		4	-1.65325	-1.26428	-0.841915	0.809944	0.735085	0.538005	1.00049	0.68746	-0.0115342	17	17	17	23.6	23.6	23.6	98.11	0	84.223	663110000	75	1.41915	1.77362	1.4169	F1M589	F1M589			0.0380934	0.0168415	0.0382913
Eif4a2	Eukaryotic initiation factor 4A-II;Eukaryotic initiation factor 4A-II, N-terminally processed	4	-1.24055	-1.46435	-1.05833	0.985138	0.720986	0.224563	0.96065	0.856044	0.0158472	26	12	12	75.4	47.2	47.2	46.402	0	222.12	3511000000	159	1.41076	1.76719	1.41063	Q5RKI1;A0A0G2K8B7;O08772	Q5RKI1;A0A0G2K8B7			0.0388365	0.0170927	0.0388481
Acta1	Actin, alpha skeletal muscle	4	-1.24947	-1.46401	-1.18417	1.0082	0.57392	0.304525	0.708984	0.879415	0.422612	28	2	2	81.4	10.6	10.6	42.051	0	141.54	358600000	50	1.94902	2.31435	1.94881	P68136	P68136			0.0112455	0.00484898	0.011251
Ogn		4	-1.41773	-1.42236	-1.11918	0.835097	0.632977	0.612207	0.654196	0.790609	0.434178	8	8	8	25.8	25.8	25.8	34.069	0	67.733	568500000	32	2.56761	2.93672	2.56706	D3ZVB7	D3ZVB7			0.00270639	0.00115686	0.00270982
Gatm	Glycine amidinotransferase, mitochondrial	4	-1.4784	-1.23349	-1.08169	1.09838	0.731982	0.0872912	0.302663	0.934528	0.638741	12	12	12	39.2	39.2	39.2	48.242	0	96.327	666430000	47	1.49668	1.85524	1.49666	P50442	P50442			0.0318654	0.013956	0.0318669
Git1	ARF GTPase-activating protein GIT1	4	-1.2183	-1.27841	-1.43933	0.855183	0.706501	0.404951	0.704039	0.876618	0.388753	25	21	21	41	36	36	85.23	0	60.678	1164300000	105	2.24797	2.616	2.24797	Q9Z272;A0A0G2K527	Q9Z272;A0A0G2K527			0.00564976	0.00242103	0.00564976
Mylpf	Myosin regulatory light chain 2, skeletal muscle isoform	4	-1.37802	-1.26654	-1.26785	0.761695	0.83242	0.403145	0.815331	0.853475	0.246341	15	15	15	86.4	86.4	86.4	18.969	0	323.31	23302000000	648	2.04714	2.41353	2.04705	P04466	P04466			0.0089714	0.00385896	0.00897325
Hspb2	Heat shock protein beta-2	4	-1.06294	-1.30679	-1.46845	0.52538	0.745651	0.462451	1.18275	0.722061	0.199883	6	6	6	58.2	58.2	58.2	20.346	0	67.895	322830000	38	1.67534	2.03539	1.67347	O35878	O35878			0.0211184	0.00921743	0.0212095
Gstt2	Glutathione S-transferase theta-2	4	-1.05612	-1.52713	-1.31577	0.807557	0.629297	0.461425	0.71188	0.978217	0.310636	8	8	8	43	43	43	27.439	0	30.356	777840000	57	1.95628	2.32176	1.95614	B6DYQ9;P30713;A0A0G2K3C6;A0A0G2JZV9;D3Z8I7	B6DYQ9;P30713;A0A0G2K3C6			0.0110591	0.00476694	0.0110627
Plxnb2		4	-1.18784	-1.16974	-1.39714	0.976729	0.580182	0.0872374	0.657185	1.21784	0.235545	59	59	57	43.2	43.2	42.4	205.95	0	323.31	4746000000	406	1.41267	1.76624	1.40971	D3ZQ57;D4A7M0	D3ZQ57			0.0386661	0.0171301	0.0389305
Amph	Amphiphysin	4	-1.50959	-1.01007	-1.05952	1.546	0.434231	0.134533	0.800523	0.57724	0.0866612	16	15	15	33.5	32.4	32.4	74.877	0	55.969	596990000	73	1.08006	1.41937	1.07429	O08838;A0A0G2JX32;F1LPP0;A0A0G2K5Z4;Q68FR2	O08838;A0A0G2JX32;F1LPP0;A0A0G2K5Z4			0.0831649	0.0380741	0.0842772
Adprhl2		4	-0.743225	-1.495	-1.5509	1.03932	0.702718	0.707125	0.689058	0.478149	0.172756	9	9	9	32.4	32.4	32.4	39.375	0	79.537	590200000	56	1.67005	2.01471	1.65313	B0K017	B0K017			0.0213772	0.00966696	0.0222264
Rtn4	Reticulon;Reticulon-4	4	-1.21498	-1.18607	-1.41837	1.23082	0.808726	0.620746	0.480728	0.551065	0.127339	45	45	33	61	61	44.6	126.4	0	323.31	19273000000	775	2.07605	2.41119	2.04472	F1LQN3;Q9JK11;Q5U1Z3;Q540J3;Q9JK11-4;Q9JK11-3	F1LQN3;Q9JK11			0.00839363	0.00387981	0.00902153
Bcam	Basal cell adhesion molecule	4	-1.6917	-0.785859	-1.30909	0.753053	0.206482	0.745694	0.953938	0.78222	0.345263	9	9	9	16	16	16	67.511	0	17.444	258960000	33	1.49428	1.85084	1.49236	Q9ESS6	Q9ESS6			0.032042	0.0140981	0.032184
Fhl2	Four and a half LIM domains protein 2	4	-1.61849	-1.27028	-1.00145	0.761336	0.762787	0.882089	0.559732	0.667056	0.257218	23	23	23	69.5	69.5	69.5	32.086	0	305.76	35340000000	647	2.158	2.51366	2.14635	O35115	O35115			0.00695024	0.00306436	0.00713921
Pgm3		4	-1.86557	-1.08281	-0.855265	0.978377	0.549785	0.622755	0.629315	0.66767	0.355746	29	29	29	64.6	64.6	64.6	59.684	0	295.19	9999200000	372	1.56434	1.92087	1.56096	B2RYN0;D3ZFX4	B2RYN0;D3ZFX4			0.0272684	0.0119986	0.0274815
LOC102546963		4	-1.89863	-0.908261	-1.02671	0.706735	0.627594	0.800073	0.67568	0.545789	0.477732	7	7	7	40.2	40.2	40.2	27.037	0	16.234	257630000	24	1.66586	2.02504	1.66329	D3Z973	D3Z973			0.0215844	0.00943974	0.0217125
Gm2a		4	-1.04764	-1.3897	-1.28941	0.913519	1.12998	0.815358	0.0104995	0.141728	0.715675	5	5	5	28.6	28.6	28.6	21.521	0	29.327	5533300000	140	1.95979	2.26869	1.90364	Q8CJH4;Q6IN37	Q8CJH4;Q6IN37			0.0109701	0.00538654	0.0124842
P4ha1	Prolyl 4-hydroxylase subunit alpha-1	4	-1.03292	-1.24922	-1.47389	1.04007	1.20523	0.573245	0.145872	0.359445	0.432164	30	30	30	58.6	58.6	58.6	60.897	0	323.31	55262000000	1041	2.02674	2.34268	1.97685	P54001	P54001			0.00940286	0.00454276	0.0105475
Aprt	Adenine phosphoribosyltransferase	4	-0.878048	-1.58665	-1.24102	1.22127	0.924736	0.573571	0.123966	0.197867	0.664311	14	14	14	85.6	85.6	85.6	19.546	0	306.47	10505000000	365	1.6525	1.97122	1.61039	P36972	P36972			0.0222587	0.0106851	0.0245251
Bloc1s3	Biogenesis of lysosome-related organelles complex 1 subunit 3	4	-0.980522	-0.935585	-1.62734	0.896868	0.758064	1.01536	-0.399829	0.376756	0.896233	6	6	6	39.5	39.5	39.5	20.3	0	54.226	165440000	22	1.24477	1.54954	1.19939	D4A3V6	D4A3V6			0.0569154	0.0282137	0.0631844
Mgmt	Methylated-DNA--protein-cysteine methyltransferase	4	-1.17192	-1.25299	-1.36364	0.622383	0.956369	0.987443	0.110459	0.175363	0.936536	8	8	8	44.5	44.5	44.5	22.243	0	73.63	1365400000	82	1.77757	2.11571	1.75258	P24528	P24528			0.016689	0.00766108	0.0176775
Snx1	Sorting nexin-1	4	-0.573254	-1.33874	-1.62361	0.776264	1.21756	0.818387	0.280131	-0.173021	0.61629	22	21	21	50	47.9	47.9	59.044	0	195.97	3592400000	182	1.34012	1.63085	1.27804	Q99N27	Q99N27			0.0456962	0.0233965	0.0527181
Retsat	All-trans-retinol 13,14-reductase	4	-0.949778	-1.13408	-1.54568	0.594295	1.24451	1.03508	-0.0700286	0.185371	0.640314	17	17	17	37.3	37.3	37.3	67.477	0	32.42	632370000	43	1.62001	1.91589	1.55608	G3V7V6;Q8VHE9	G3V7V6;Q8VHE9			0.0239878	0.012137	0.027792
Gsta1;Gsta3	Glutathione S-transferase;Glutathione S-transferase alpha-3	4	-1.07521	-1.19093	-1.47859	0.944153	0.926914	1.11401	0.147803	0.1668	0.445061	10	10	8	60.2	60.2	53.4	25.319	0	23.441	935250000	60	2.53615	2.83443	2.46521	B6DYP8;P04904;Q9JLX3;A0A0G2JVT2;A0A0G2JTB1;P46418;A0A0G2K8Q5;F7F2H5;Q4FZZ3;B6DYP7;P04903;P00502;Q63232;Q498T5;Q9JLQ6;Q7M0F7;Q6TUG1;D3ZD94;A9UMW1;P14942	B6DYP8;P04904;Q9JLX3;A0A0G2JVT2			0.00290971	0.0014641	0.00342602
Hprt1	Hypoxanthine-guanine phosphoribosyltransferase	4	-1.017	-1.38601	-1.37082	0.697433	1.08111	1.08769	0.249456	0.173416	0.484724	12	12	12	77.5	77.5	77.5	24.477	0	133.82	12640000000	360	2.28505	2.5987	2.23079	F1LNY0;P27605;Q6LDG5	F1LNY0;P27605;Q6LDG5			0.0051874	0.00251942	0.00587773
Ldhb	L-lactate dehydrogenase B chain	4	-1.12907	-1.38366	-1.40618	0.97704	0.666727	0.834378	0.353125	0.43928	0.648358	18	16	16	65.6	59.3	59.3	36.612	0	262.41	24214000000	431	2.62747	2.98254	2.6127	P42123	P42123			0.00235793	0.00104102	0.0024395
Bin1	Myc box-dependent-interacting protein 1	4	-1.07314	-1.48601	-1.27999	1.15856	0.836813	0.697871	0.44464	0.230942	0.470311	21	21	20	70	70	68	45.833	0	146.46	3840600000	251	2.30793	2.64279	2.2746	Q5HZA7;F1LMX1;O08839-6;O08839-5;O08839-2;O08839;D4A4P1;O08839-3;O08839-4	Q5HZA7;F1LMX1;O08839-6;O08839-5;O08839-2;O08839;D4A4P1;O08839-3			0.00492119	0.0022762	0.00531374
Cand2	Cullin-associated NEDD8-dissociated protein 2	4	-0.963623	-1.60085	-1.27936	1.03081	0.563837	0.972508	0.436469	0.386878	0.453332	36	35	35	36.6	36	36	135.64	0	163.64	1705400000	162	2.06724	2.4107	2.04423	D4AAI5;A0A0G2K139;Q9R0L4-2;Q9R0L4;G3V7E8;Q9R0L4-3	D4AAI5;A0A0G2K139;Q9R0L4-2;Q9R0L4;G3V7E8;Q9R0L4-3			0.00856564	0.00388419	0.00903171
Gfpt1	Glutamine--fructose-6-phosphate aminotransferase [isomerizing] 1	4	-1.17993	-1.38766	-1.26698	0.890414	0.666441	1.03461	0.454716	0.0392274	0.749161	35	35	35	64.4	64.4	64.4	78.918	0	323.31	7412100000	428	2.04783	2.38894	2.02267	A0A0G2KB56;P82808;Q6IE69;Q4KMC4	A0A0G2KB56;P82808			0.00895715	0.00408376	0.00949139
Ankrd1	Ankyrin repeat domain-containing protein 1	4	-1.03373	-1.46416	-1.3923	0.851671	0.872827	0.790892	0.641734	0.53377	0.199297	14	14	14	43.6	43.6	43.6	36.063	0	62.866	645250000	72	2.35181	2.70246	2.33391	Q8R560	Q8R560			0.00444826	0.00198399	0.00463543
Ehd4		4	-1.312	-1.27406	-1.31649	0.712324	0.902203	1.02556	0.522002	0.33479	0.405668	29	28	23	67.3	65.4	56.9	61.467	0	280.57	8290800000	452	3.09871	3.44347	3.07243	Q8R3Z7	Q8R3Z7			0.000796691	0.000360189	0.000846389
Ephx1	Epoxide hydrolase 1	4	-1.12946	-1.42679	-1.26951	0.836366	1.06257	0.970231	0.355167	0.297247	0.304184	21	21	21	51	51	51	52.581	0	137.75	2751100000	134	3.06752	3.38682	3.01588	P07687;F1LTS8	P07687			0.000856012	0.000410374	0.000964095
Ccnd1;ZH17	G1/S-specific cyclin-D1	4	-1.06482	-1.43296	-1.3715	0.630429	0.960122	0.952051	0.61758	0.163111	0.545983	15	15	14	58.6	58.6	55.6	33.483	0	241.06	825040000	83	2.21259	2.55985	2.19221	P39948;Q99NB4;Q1RP72;Q1JUA4	P39948;Q99NB4;Q1RP72			0.00612929	0.00275518	0.00642377
Klhl41	Kelch-like protein 41	4	-1.13595	-1.24583	-1.51138	0.873303	0.860497	0.890134	0.515299	0.258528	0.495403	28	28	28	55.6	55.6	55.6	68.212	0	323.31	7735900000	449	2.75926	3.1041	2.73386	Q9ER30;REV__D3Z908;REV__D3ZCC5	Q9ER30			0.00174076	0.000786865	0.00184561
		4	-1.22242	-1.29172	-1.42468	0.732182	0.687914	1.02811	0.510608	0.480293	0.499718	61	61	51	23.9	23.9	20.1	375.76	0	151.82	1824300000	208	2.92311	3.28126	2.91055	Q7TN00;Q5VJM6;Q5VJM7;Q9Z1B6	Q7TN00			0.00119369	0.000523287	0.00122871
Ncam1		4	-1.08395	-1.12414	-1.62636	0.904087	1.04012	0.75991	0.315367	0.343981	0.47099	35	35	2	45.5	45.5	2.3	91.635	0	323.31	35909000000	1117	2.29616	2.62976	2.26165	F1LUV9;Q3T1H3	F1LUV9;Q3T1H3			0.00505638	0.00234552	0.00547457
Ckm	Creatine kinase M-type	4	-1.05725	-1.30901	-1.50688	0.874638	0.702669	1.06167	0.357407	0.433507	0.443255	18	18	18	59.1	59.1	59.1	43.018	0	107.1	2022400000	143	2.5072	2.84914	2.47985	A0A0G2JSP8;P00564;P07335	A0A0G2JSP8;P00564			0.00311028	0.00141534	0.00331246
Slc12a2;NKCC1		4	-1.22651	-1.18755	-1.3967	0.647735	0.863116	1.25784	0.47723	0.300529	0.264312	31	31	27	30.8	30.8	26.8	130.35	0	144.55	1561700000	172	2.27845	2.60463	2.23668	Q9QX10;E9PTX9;Q9R1N0	Q9QX10;E9PTX9;Q9R1N0			0.00526684	0.00248525	0.00579856
Gsta6	Glutathione S-transferase A6	4	-1.09575	-1.2067	-1.55557	0.799718	1.14303	0.486233	0.674704	0.352618	0.401711	8	6	6	32.9	26.1	26.1	25.808	0	9.3035	399680000	25	1.96601	2.31787	1.9523	Q6AXY0	Q6AXY0			0.0108141	0.00480983	0.0111609
Lipa	Lipase;Lysosomal acid lipase/cholesteryl ester hydrolase	4	-1.10591	-1.38172	-1.45543	0.875326	0.894416	0.56604	0.500379	0.551743	0.555146	9	9	9	36.3	36.3	36.3	45.078	0	97.386	952340000	86	2.64613	3.00881	2.63888	Q6IMY6;Q64194	Q6IMY6;Q64194			0.00225876	0.000979919	0.00229678
Tpm1	Tropomyosin alpha-1 chain	4	-1.29946	-1.04033	-1.51076	0.953187	0.893157	0.703124	0.781769	0.256085	0.26323	36	2	1	76.8	10.2	5.6	32.68	0	64.873	4577400000	114	2.08306	2.42817	2.06155	P04692	P04692			0.00825924	0.00373104	0.00867861
Nes;LOC100910255	Nestin	4	-1.35262	-1.31905	-1.29228	0.862385	0.778539	0.795639	0.50512	0.513666	0.508599	106	106	105	66.9	66.9	66.6	208.91	0	323.31	84993000000	2909	4.71045	5.07125	4.69913	G3V8F8;P21263;A0A0G2K9I4;M0R3Z1;P21263-2;M0RCP0;D3ZWJ2;O09019	G3V8F8;P21263;A0A0G2K9I4;M0R3Z1;P21263-2;M0RCP0;D3ZWJ2			1.94783e-05	8.48692e-06	1.99926e-05
Myh7	Myosin-7	4	-1.44708	-1.07496	-1.38898	0.864396	0.832865	0.61074	0.600444	0.232758	0.769812	40	6	4	15.3	2.5	1.7	222.9	0	94.338	2222900000	135	2.20965	2.5706	2.20287	G3V8B0;P02564	G3V8B0;P02564			0.00617092	0.00268782	0.00626801
Myh3	Myosin-3	4	-1.30119	-1.21623	-1.46376	0.780819	0.784374	0.590656	0.602292	0.629166	0.593876	142	141	59	64.4	64	32.3	223.78	0	323.31	243610000000	4726	3.22213	3.59192	3.22064	G3V6D8;P12847;Q6LEH4;Q63353;Q6LEH0;Q9Z2B7;A0A0G2JX91;Q7TQB6;Q63352	G3V6D8;P12847			0.000599612	0.000255906	0.000601672
Wdr44	WD repeat-containing protein 44	4	-1.18381	-1.37082	-1.40161	0.872702	0.768738	0.717998	0.665371	0.39382	0.537614	37	37	37	47.8	47.8	47.8	101.6	0	278.33	1974700000	217	3.02374	3.38673	3.0158	A0A0G2K7S6;Q9R037;F1LSM3;A0A0G2JX77	A0A0G2K7S6;Q9R037;F1LSM3;A0A0G2JX77			0.000946804	0.000410459	0.000964273
Ldb3		4	-1.22251	-1.35044	-1.34415	0.944327	0.881226	0.676934	0.661304	0.493783	0.259522	24	24	6	45	45	11.3	76.815	0	323.31	2423600000	184	2.67908	3.03283	2.66282	A0A096MJ01	A0A096MJ01			0.00209373	0.000927193	0.0021736
Ldb3		4	-1.31759	-1.23535	-1.41391	0.866295	0.734549	0.728775	0.672343	0.478329	0.486558	22	4	4	41.1	5	5	72.332	0	30.119	615300000	36	3.27873	3.64355	3.27219	A0A096MKD4;A0A0G2JYM0;Q5XIG1;A0A0G2JXR0	A0A096MKD4;A0A0G2JYM0;Q5XIG1;A0A0G2JXR0			0.000526344	0.000227222	0.000534331
Cd81	Tetraspanin;CD81 antigen	4	-1.40922	-1.04593	-1.36289	0.730115	1.00689	0.797844	-0.0163561	0.518391	0.781155	3	3	3	25	25	25	25.904	0	131.66	761700000	37	1.87457	2.21741	1.85296	Q6P9V1;Q62745	Q6P9V1;Q62745			0.0133484	0.00606164	0.0140294
Hagh	Hydroxyacylglutathione hydrolase, mitochondrial	4	-1.40661	-1.24489	-1.23436	0.725304	1.0345	0.637285	0.194575	0.834638	0.459555	8	8	8	37.2	37.2	37.2	34.158	0	104.96	1670100000	78	2.11226	2.46792	2.10097	F1LQI1;O35952-2;O35952	F1LQI1;O35952-2;O35952			0.00772218	0.00340471	0.00792556
Tnnc2		4	-1.48034	-1.09942	-1.32978	0.856304	0.901872	0.580957	0.28102	0.508347	0.78104	10	9	9	68.8	64.4	64.4	18.096	0	110.22	1523000000	109	2.23404	2.59385	2.22597	Q304F3	Q304F3			0.00583391	0.00254771	0.00594333
Fdft1	Squalene synthase	4	-1.40094	-1.2128	-1.15323	0.871809	0.764607	1.23924	0.074694	0.315757	0.500868	10	10	10	28.4	28.4	28.4	48.106	0	25.832	319090000	43	2.26114	2.57312	2.20538	Q02769;Q8BHH4	Q02769			0.005481	0.00267227	0.00623189
Itga3		4	-1.4777	-1.18697	-1.18077	0.923739	0.807008	0.897505	0.0756234	0.722252	0.41932	20	20	20	30.4	30.4	30.4	117.01	0	109.88	2128800000	127	2.19701	2.53689	2.16941	D3ZCG9;D3ZQM3;M0R6F6	D3ZCG9;D3ZQM3			0.00635316	0.00290476	0.00677002
Col8a1		4	-1.41715	-1.23061	-1.21672	0.843606	0.722085	1.04329	0.243584	0.277876	0.734035	17	17	17	27.2	27.2	27.2	73.506	0	54.088	2142100000	127	2.3189	2.66186	2.29355	D4AC70	D4AC70			0.00479844	0.00217841	0.00508686
Ptgis	Prostacyclin synthase	4	-1.22144	-1.14338	-1.43961	1.04586	0.968917	0.882336	0.239287	0.198468	0.469568	24	24	24	56.9	56.9	56.9	57.127	0	323.31	4406100000	272	2.8337	3.14799	2.77762	Q62969;F1LP67;A0A0G2K776;A0A0G2JYL7	Q62969;F1LP67;A0A0G2K776			0.00146656	0.00071123	0.00166871
Uchl1	Ubiquitin carboxyl-terminal hydrolase isozyme L1	4	-1.23959	-1.13732	-1.28314	1.27201	0.618136	1.10515	-0.0220227	0.524618	0.162161	8	8	8	52	52	52	24.838	0	207.09	1373900000	83	1.95682	2.24336	1.8786	Q00981	Q00981			0.0110454	0.00571005	0.0132251
Pbxip1	Pre-B-cell leukemia transcription factor-interacting protein 1	4	-1.26859	-0.968017	-1.44781	1.13485	1.04196	0.911686	0.0473447	0.278321	0.270261	27	27	27	57.3	57.3	57.3	80.275	0	249.65	4131300000	263	2.48247	2.76103	2.39217	A2VD12	A2VD12			0.00329253	0.00173368	0.0040535
Fam136a	Protein FAM136A	4	-1.43098	-0.819648	-1.2807	0.899155	1.16723	1.05384	-0.301708	0.273676	0.439132	9	9	9	68.8	68.8	68.8	15.625	0	121.83	2505800000	147	1.75411	2.00747	1.64601	B0BN94	B0BN94			0.0176153	0.00982947	0.0225938
Srl		4	-1.11905	-1.14017	-1.6691	0.430437	0.630344	0.791354	0.593688	0.769878	0.712617	23	23	23	29.8	29.8	29.8	98.363	0	116.52	1545100000	106	2.19377	2.56074	2.19309	F1LWG8	F1LWG8			0.00640074	0.00274954	0.00641077
Cp	Ceruloplasmin	4	-1.02882	-1.33743	-1.52735	0.446766	0.827269	1.03414	0.390667	0.608658	0.586092	21	21	21	22.7	22.7	22.7	120.66	0	85.565	747790000	97	2.07119	2.4307	2.06406	G3V7K3;A0A0G2K9I6;Q9JL97;P13635;F2YBS8;CON__ENSEMBL:ENSBTAP00000031900	G3V7K3;A0A0G2K9I6;Q9JL97;P13635			0.00848809	0.00370937	0.00862859
		4	-1.00645	-1.36609	-1.42974	0.382868	0.395778	1.35319	0.497063	0.528234	0.645154	8	8	8	22.5	22.5	22.5	47.485	0	16.411	204990000	18	1.55447	1.9113	1.55158	D3Z874	D3Z874			0.0278952	0.0122659	0.0280815
Akap5	A-kinase anchor protein 5	4	-0.966768	-1.84358	-1.06849	0.578576	0.66427	0.644552	0.749953	0.607388	0.634103	14	14	14	28.6	28.6	28.6	75.971	0	207.39	873880000	73	1.83893	2.20306	1.83878	F1LPP6;P24587	F1LPP6;P24587			0.0144901	0.00626527	0.0144951
Etl4		4	-0.994645	-1.57486	-1.23127	0.18374	0.898009	0.696646	1.09023	0.647611	0.284543	21	21	21	14.7	14.7	14.7	214.66	0	68.07	516940000	57	1.52734	1.88574	1.52653	M0R5H1	M0R5H1			0.0296934	0.0130095	0.0297488
Prdx6	Peroxiredoxin-6	4	-1.25387	-1.28522	-1.38317	0.772737	0.720167	0.532716	0.428633	0.416126	1.05187	17	17	17	79.9	79.9	79.9	24.818	0	323.31	20142000000	441	2.12778	2.49472	2.12755	O35244	O35244			0.00745109	0.00320096	0.00745504
Uchl3	Ubiquitin carboxyl-terminal hydrolase;Ubiquitin carboxyl-terminal hydrolase isozyme L3	4	-0.801578	-1.57632	-1.40898	0.687186	0.823433	0.506247	1.0257	0.0965913	0.647722	14	14	14	81.3	81.3	81.3	26.109	0	255.22	6747300000	230	1.4842	1.84166	1.48338	D4ABI6;Q91Y78	D4ABI6;Q91Y78			0.0327944	0.0143993	0.0328564
Cfl2		4	-1.17798	-1.50139	-1.26546	0.718662	0.863555	0.581227	0.697046	0.33844	0.745899	15	11	11	82.5	61.4	61.4	18.709	0	109.42	9539700000	270	2.42013	2.78714	2.41815	M0RC65	M0RC65			0.00380076	0.00163253	0.00381812
Mybph	Myosin-binding protein H	4	-1.32482	-1.25637	-1.40258	0.578517	0.539253	0.630201	0.801436	0.769908	0.664447	26	26	26	66.9	66.9	66.9	52.612	0	323.31	3734200000	223	3.75361	4.12217	3.75038	Q6P6V8;G3V6F1;F1LQV6;A0A0G2K9Z1;O88599	Q6P6V8;G3V6F1;F1LQV6;A0A0G2K9Z1;O88599			0.000176356	7.54797e-05	0.000177672
Anxa3	Annexin;Annexin A3	4	-1.30749	-1.24446	-1.40561	0.578891	0.607737	0.366871	0.81392	0.806187	0.783955	27	27	27	75.9	75.9	75.9	36.363	0	323.31	44592000000	809	3.32906	3.69057	3.31916	F1M0L7;P14669;Q6TXF2	F1M0L7;P14669			0.000468749	0.000203906	0.000479557
Bcar1	Breast cancer anti-estrogen resistance protein 1	4	-1.2404	-1.48944	-1.21711	0.715199	0.394023	0.594968	0.915696	0.768033	0.559024	25	25	1	36.4	36.4	1.5	104.29	0	160.68	1936100000	179	2.53846	2.90404	2.53451	F1LVA8;D3ZE30;Q63767	F1LVA8;D3ZE30;Q63767			0.00289428	0.00124727	0.00292072
Tnni1	Troponin I, slow skeletal muscle	4	-1.3885	-1.06746	-1.40236	0.623789	0.412159	0.390433	1.21344	0.750248	0.468245	9	9	9	41.2	41.2	41.2	21.697	0	143.49	4531900000	174	1.9711	2.32286	1.95723	F1LMC6;A0A096MIZ5;P13413	F1LMC6;A0A096MIZ5;P13413			0.0106881	0.00475488	0.0110349
Tnnt2	Troponin T, cardiac muscle	4	-1.36178	-1.26903	-1.35116	0.727621	0.67759	0.517257	0.812911	0.711379	0.535221	16	16	15	43.3	43.3	43.3	34.452	0	251.3	6919700000	230	3.09833	3.46916	3.09807	A9YUA5;F1LQ95;B1WBR4;P50753-2;P50753	A9YUA5;F1LQ95;B1WBR4;P50753-2;P50753			0.000797389	0.0003395	0.000797866
Cdh15		4	-1.32378	-1.39199	-1.19752	0.492927	0.435196	1.04214	0.668678	0.415323	0.859014	16	16	16	26.9	26.9	26.9	85.752	0	248.33	1153700000	105	2.05167	2.41819	2.05166	Q75NI5	Q75NI5			0.0088783	0.00381777	0.00887851
Rai14	Ankycorbin	4	-1.50402	-1.48941	-0.849076	0.271922	0.409424	0.974351	0.713614	0.65504	0.818161	58	58	58	67.5	67.5	67.5	106	0	323.31	15454000000	765	1.7202	2.07896	1.71636	R9PXZ3;Q5U312-2;Q5U312;F1LM75	R9PXZ3;Q5U312-2;Q5U312;F1LM75			0.0190458	0.00833758	0.019215
Sord	Sorbitol dehydrogenase	4	-1.30022	-1.30076	-1.39145	0.648771	0.58945	0.744352	0.600361	0.654099	0.755397	21	21	16	65	65	56.6	38.234	0	323.31	20570000000	475	3.63617	4.00788	3.63616	P27867	P27867			0.000231116	9.82019e-05	0.000231121
Mrc2	C-type mannose receptor 2	4	-1.49014	-1.26811	-1.1554	0.175852	0.691035	0.720503	0.819103	0.786409	0.72075	37	37	37	30.7	30.7	30.7	170.63	0	323.31	10181000000	428	2.25597	2.61655	2.24852	F1LMA7;Q4TU93	F1LMA7;Q4TU93			0.00554664	0.00241796	0.00564261
Snap91	Clathrin coat assembly protein AP180	4	-1.23068	-1.37636	-1.35862	0.42986	0.625907	0.918415	0.668323	0.701441	0.621709	10	8	8	14.3	12	12	91.429	0	16.997	90866000	15	2.6508	3.02076	2.65079	A0A0G2K0B6;F1LRK0;Q05140-2;Q05140	A0A0G2K0B6;F1LRK0;Q05140-2;Q05140			0.0022346	0.000953323	0.00223465
Myl6b;RGD1560334		4	-1.34466	-1.2999	-1.32764	0.444877	0.627231	0.879553	0.646638	0.607549	0.766356	16	16	15	75.8	75.8	69.6	22.807	0	107.26	30537000000	252	2.79253	3.16288	2.79247	D3ZHA7;M0RDP3	D3ZHA7;M0RDP3			0.00161239	0.000687258	0.00161261
Akap12	A-kinase anchor protein 12	4	-1.30712	-1.31805	-1.3572	0.790322	0.646167	0.468598	0.740835	0.733703	0.602747	86	86	1	77.1	77.1	0.7	173.06	0	323.31	130490000000	3449	3.13112	3.50185	3.13071	Q5QD51-2	Q5QD51-2			0.000739401	0.000314884	0.000740099
Myl4	Myosin light chain 4	4	-1.18356	-1.46925	-1.33414	0.584165	0.648623	0.651565	0.692188	0.717096	0.693322	17	17	15	87.6	87.6	77.2	21.254	0	323.31	26729000000	459	3.38729	3.75813	3.38664	M0R4E1;P17209	M0R4E1;P17209			0.00040993	0.00017453	0.000410544
Synpo2l		4	-0.928431	-1.54007	-1.46867	0.65429	0.514003	0.691449	0.704135	0.689004	0.684296	12	12	12	17.9	17.9	17.9	103.06	0	115.68	812380000	58	2.28048	2.64806	2.27983	D3ZZ68	D3ZZ68			0.00524228	0.00224874	0.00525013
Igf2	Insulin-like growth factor II;Insulin-like growth factor II;Preptin	4	-1.04986	-1.48882	-1.38676	0.962845	0.684405	0.482105	0.417794	0.63523	0.74306	6	6	6	44.2	44.2	44.2	17.376	0	222.85	1850100000	98	2.19102	2.55714	2.18951	Q63265;M9NW49;A0A0G2JTA6;P01346;Q53WT7	Q63265;M9NW49;A0A0G2JTA6;P01346			0.0064414	0.00277243	0.00646383
Tnnt3	Troponin T, fast skeletal muscle	4	-1.23191	-1.37341	-1.37698	0.747573	0.562457	0.507436	0.735093	0.665229	0.764509	10	10	7	34.8	34.8	30.4	29.741	0	66.24	1801100000	96	3.29909	3.66883	3.29745	A0A0H2UHY9;P09739-4;P09739-3;P09739-7;P09739-5;P09739-6;P09739;A0A0G2KAY2;A0A0G2JSW6;P09739-2	A0A0H2UHY9;P09739-4;P09739-3;P09739-7;P09739-5;P09739-6;P09739;A0A0G2KAY2;A0A0G2JSW6;P09739-2			0.000502238	0.000214373	0.000504139
Synpo	Synaptopodin	4	-1.26517	-1.36469	-1.3597	0.620331	0.751296	0.704341	0.753338	0.546736	0.613514	30	30	9	43.8	43.8	10.8	96.717	0	311.69	3961400000	308	3.49664	3.86788	3.49628	B1VKB4;Q9Z327-3;Q9Z327-2	B1VKB4;Q9Z327-3;Q9Z327-2			0.000318684	0.000135556	0.000318948
		4	-1.31101	-1.36207	-1.29706	0.834064	0.550425	0.875061	0.61861	0.532071	0.559914	65	65	0	55.2	55.2	0	156.76	0	323.31	9914400000	594	3.0987	3.46568	3.0946	A0A0G2K174;Q6JBI6	A0A0G2K174;Q6JBI6			0.00079671	0.000342232	0.000804267
Osbpl6	Oxysterol-binding protein	4	-1.09776	-1.42267	-1.42039	0.716118	0.638897	0.815004	0.791238	0.666306	0.313265	14	14	14	17.7	17.7	17.7	106.32	0	27.309	395480000	38	2.37637	2.74297	2.3742	D4A0F3;A0A0G2JZR1	D4A0F3;A0A0G2JZR1			0.00420368	0.0018073	0.00422474
Unc45b		4	-1.39168	-1.32969	-1.2461	0.679861	0.719071	0.9268	0.586445	0.56879	0.486511	50	50	50	62.6	62.6	62.6	103.4	0	254.82	2839600000	246	3.28583	3.65081	3.27945	A0A096MJB5;D4A8U9	A0A096MJB5;D4A8U9			0.000517809	0.000223455	0.000525473
Lrba		4	-1.51096	-1.33622	-1.12422	0.634624	0.74282	0.694276	0.745467	0.509018	0.645195	41	41	41	16.1	16.1	16.1	309.71	0	115.86	7303000000	149	2.79815	3.16818	2.79775	A0A0G2JYR4;A0A0G2JYI0;F1LZG6;F1M3T7	A0A0G2JYR4;A0A0G2JYI0;F1LZG6			0.00159166	0.000678922	0.00159313
Afap1l2		4	-1.14823	-1.55871	-1.25496	0.541694	0.818498	0.767529	0.574125	0.606798	0.653264	23	23	23	36.5	36.5	36.5	92.81	0	95.157	1782200000	131	2.6482	3.01699	2.64703	F1M5W8;M0R484;F7IXA1	F1M5W8;M0R484;F7IXA1			0.00224802	0.000961634	0.00225408
Scfd2		4	-1.12603	-1.42941	-1.41159	0.675151	0.744959	0.722935	0.530131	0.497355	0.796504	22	22	22	42.7	42.7	42.7	74.794	0	109.15	605630000	101	2.76726	3.13622	2.76588	Q5U2R9	Q5U2R9			0.00170899	0.000730769	0.00171443
Sema3c		4	-1.49272	-1.44266	-0.998943	0.688916	0.855159	0.515757	0.446897	0.682313	0.745284	20	20	20	35.6	35.6	35.6	85.27	0	74.446	1077200000	80	2.2453	2.61284	2.24483	B5DFL7;F7FHT4	B5DFL7;F7FHT4			0.0056846	0.00243871	0.00569076
Myh1		4	-1.2684	-1.44169	-1.27668	0.686382	0.76784	0.730513	0.543167	0.606925	0.651946	111	60	2	53.7	34.6	1.2	223.28	0	323.31	6153200000	451	3.67448	4.04424	3.67249	F1LRV9;Q0GC39	F1LRV9			0.000211602	9.0315e-05	0.000212574
Filip1l		4	-1.25375	-1.50053	-1.19002	0.461535	0.74347	0.422462	0.641782	0.863825	0.811219	32	32	32	30.9	30.9	30.9	135.84	0	286.79	3299600000	318	2.62587	2.98925	2.61939	D4A900	D4A900			0.00236663	0.00102506	0.0024022
Pkia	cAMP-dependent protein kinase inhibitor alpha	4	-1.1872	-1.66788	-0.890521	0.659685	0.573745	1.02448	-0.0600632	0.787925	0.759834	5	5	5	89.5	89.5	89.5	7.9604	0	20.164	121170000	20	1.43322	1.78204	1.42512	P63249	P63249			0.0368791	0.0165181	0.0375734
Mgea5	Protein O-GlcNAcase	4	-0.884993	-1.66093	-1.17884	0.689871	0.453895	0.854055	0.120435	0.383637	1.22287	36	36	36	49.5	49.5	49.5	106.17	0	323.31	6164100000	360	1.32232	1.67546	1.32133	A0A0H2UI10;Q8VIJ5;Q8VIJ5-3;Q8VIJ5-2	A0A0H2UI10;Q8VIJ5;Q8VIJ5-3;Q8VIJ5-2			0.047608	0.0211125	0.0477167
Itpr1	Inositol 1,4,5-trisphosphate receptor type 1	4	-1.49637	-1.47219	-0.722646	0.578008	0.89042	0.973616	-0.134498	0.794537	0.589123	63	63	54	27.2	27.2	24.7	311.24	0	201.88	3245600000	284	1.38782	1.72367	1.36822	F1LQX8;C7E1V2;F1LNT1;P29994-8;P29994-7;P29994-6;P29994-5;P29994-4;P29994-2;P29994-3;P29994;A0A0A0MY31;A0A0G2KAH9;F1LQR8;Q5BJS8	F1LQX8;C7E1V2;F1LNT1;P29994-8;P29994-7;P29994-6;P29994-5;P29994-4;P29994-2;P29994-3;P29994;A0A0A0MY31;A0A0G2KAH9			0.040943	0.0188943	0.0428331
Ddx18		5	0.643122	-0.0614621	0.549234	-1.20313	-1.42443	-1.13194	0.819401	0.576617	1.23258	29	29	29	56.8	56.8	56.8	75.547	0	174.74	1821500000	182	1.73322	0.792936	0.496662	Q5XHY0	Q5XHY0			0.0184833	0.161088	0.318668
Bclaf1		5	0.375166	-0.150256	0.440122	-1.3746	-1.55161	-0.665381	1.0628	0.796092	1.06766	22	21	21	26.9	25.7	25.7	106.06	0	160.4	3685400000	201	1.58902	0.396358	0.179324	B1WC16;Q7TP73;A0A0G2K2S3;A0A0G2K1G0	B1WC16;Q7TP73;A0A0G2K2S3;A0A0G2K1G0			0.025762	0.40146	0.661723
Nup50;Npap60	Nuclear pore complex protein Nup50	5	0.757331	-0.0881812	0.564107	-1.42456	-1.5474	-0.683544	0.506134	0.715685	1.20043	18	18	18	54	54	54	49.817	0	104.66	1053800000	146	1.30268	0.615135	0.346501	O08587;G3V7R1	O08587;G3V7R1			0.0498104	0.242586	0.450297
Unc119	Protein unc-119 homolog A	5	0.457309	0.31683	-0.270891	-1.46826	-1.3325	-0.717818	0.702569	1.12125	1.19151	6	5	5	27.1	23.3	23.3	27.048	0	42.41	232630000	34	1.53509	0.275688	0.100632	Q62885;REV__D3ZLS5	Q62885			0.0291682	0.530044	0.793173
Armc6		5	0.741333	0.291095	0.317344	-1.59015	-1.55676	-0.54942	0.455609	0.857063	1.03388	13	13	13	38.5	38.5	38.5	50.647	0	66.81	572780000	55	1.35269	0.704713	0.420946	B2RYL4	B2RYL4			0.0443925	0.197373	0.379362
Ddx23		5	0.733424	0.0541166	-0.0660215	-1.25583	-1.50392	-0.767557	0.78875	1.43889	0.578147	24	24	24	37.2	37.2	37.2	93.083	0	51.175	1058300000	87	1.31974	0.344021	0.143652	B5DFJ3;G3V9M1	B5DFJ3;G3V9M1			0.0478917	0.452876	0.71837
Lars		5	0.604261	0.0341748	-0.176385	-0.812805	-1.51073	-1.19916	0.776508	1.07113	1.213	61	61	61	57.6	57.6	57.6	134.28	0	323.31	15504000000	820	1.61564	0.268404	0.0963216	Q5PPJ6	Q5PPJ6			0.0242304	0.539009	0.801085
Luc7l		5	0.2643	-0.0529764	0.00935875	-0.984762	-1.08788	-1.44382	0.894309	1.256	1.14546	11	5	5	31.8	18.3	18.3	44.049	0	35.282	633640000	40	2.28096	0.207296	0.0626448	G3V9R0;A0A0G2QBZ8	G3V9R0;A0A0G2QBZ8			0.00523649	0.620446	0.865676
Psat1	Phosphoserine aminotransferase	5	-0.0146698	0.166341	0.280929	-0.726609	-1.84924	-0.879192	1.18474	0.718333	1.11936	17	17	0	52.2	52.2	0	40.49	0	280.82	13020000000	339	1.41358	0.209021	0.0635285	E9PSV5;A0A0G2K931;A0A0G2KAC0	E9PSV5;A0A0G2K931;A0A0G2KAC0			0.0385851	0.617987	0.863916
Copz1		5	-0.109688	0.15065	0.540654	-0.605641	-1.47393	-1.46912	0.854805	1.1393	0.972977	6	6	6	35	35	35	20.198	0	94.429	1474500000	79	1.53773	0.325698	0.131689	D4A8T3	D4A8T3			0.0289915	0.472391	0.738433
		5	-0.0660912	0.302391	0.664792	-1.39982	-1.13816	-1.16017	1.04556	1.21801	0.533486	35	35	1	52.1	52.1	3.8	77.343	0	323.31	42601000000	916	1.72918	0.624117	0.353839	A0A0H2UHL9	A0A0H2UHL9			0.0186561	0.23762	0.442752
Eml4		5	-0.664465	-0.282661	0.454361	-0.819211	-1.10801	-1.03925	1.51907	1.19771	0.742454	20	19	19	26.1	25.3	25.3	101.9	0	36.302	732230000	98	1.3566	0.230465	0.074859	A0A0G2K2Z0;F1LT71	A0A0G2K2Z0;F1LT71			0.0439947	0.588214	0.841668
Sfr1	Swi5-dependent recombination DNA repair protein 1 homolog	5	-0.14913	0.255718	0.312469	-0.867028	-1.21064	-1.39926	0.676005	1.60675	0.775114	11	11	11	51.2	51.2	51.2	29.016	0	124.49	829280000	63	1.50413	0.218101	0.0682505	A0A0H2UHK0;Q6TXG9	A0A0H2UHK0;Q6TXG9			0.0313235	0.6052	0.854574
LOC100359593;LOC100360573;Rps12;LOC100912049	40S ribosomal protein S12	5	0.615115	0.133388	1.33153	-1.38522	-1.43399	-0.924527	0.35513	0.750852	0.557719	8	8	6	70.5	70.5	62.9	14.515	0	221.55	25959000000	466	1.37898	1.09321	0.766949	Q6PDW1;D3ZHB3;P63324;D3ZG05;D3ZV36	Q6PDW1;D3ZHB3;P63324;D3ZG05			0.041785	0.0806845	0.171022
Hspbp1	Hsp70-binding protein 1	5	0.545368	0.425244	0.74859	-1.3163	-1.56564	-1.02958	0.984659	0.507265	0.700399	13	13	13	46.5	46.5	46.5	39.19	0	58.926	753000000	63	2.11199	1.48457	1.13682	Q6IMX7	Q6IMX7			0.00772698	0.0327665	0.072976
Fbxo30	F-box only protein 30	5	0.651513	0.393818	0.768826	-1.66143	-1.43262	-0.770953	0.635015	0.79928	0.61655	15	15	15	23	23	23	82.011	0	99.036	891790000	70	1.7787	1.26537	0.927893	Q5XI67	Q5XI67			0.0166456	0.0542788	0.118061
Tmem132a	Transmembrane protein 132A	5	0.816815	0.0839829	0.894014	-1.48975	-1.60837	-0.631967	0.863319	0.558901	0.513053	4	4	4	6.9	6.9	6.9	110.46	0.0052485	2.0051	110360000	9	1.32912	0.920539	0.609506	G3V963;Q80WF4	G3V963;Q80WF4			0.0468684	0.120077	0.24575
Safb	Scaffold attachment factor B1	5	0.443997	0.250976	0.624259	-1.26858	-1.37663	-1.04836	1.22722	1.11334	0.0337634	25	25	20	34.4	34.4	27.9	104.41	0	243.24	2364500000	192	1.35903	0.691592	0.409876	M0RBF0;A0A0G2JZI0;O88453;A0A0G2JW97	M0RBF0;A0A0G2JZI0;O88453;A0A0G2JW97			0.0437492	0.203427	0.389156
Eprs		5	0.461608	0.684172	0.396966	-1.44071	-1.72805	-0.592214	0.997076	0.543595	0.677554	86	86	85	65.5	65.5	65	169.86	0	323.31	68282000000	1978	1.45936	0.875922	0.569657	A0A0G2JZI2;Q6TXE9;Q5I0H2	A0A0G2JZI2;Q6TXE9			0.0347248	0.133069	0.269366
Rnps1	RNA-binding protein with serine-rich domain 1	5	0.45279	0.881009	0.411582	-1.83127	-1.02856	-0.946657	0.817387	0.845725	0.39799	5	5	5	16.7	16.7	16.7	34.238	0	21.06	1065800000	79	1.5519	1.05202	0.728982	Q6AYK1;F1M6U2	Q6AYK1			0.0280608	0.0887115	0.186646
Crip2	Cysteine-rich protein 2	5	-0.104843	0.555234	1.07267	-1.49925	-1.34613	-0.865822	0.819409	0.921498	0.447242	9	9	9	60.1	60.1	60.1	22.696	0	93.569	5246400000	172	1.32925	0.783113	0.488129	P36201;D4ACX1	P36201			0.0468544	0.164773	0.324991
Numa1		5	0.346816	0.821064	0.890636	-1.60585	-1.36919	-0.905801	0.585465	0.742369	0.494498	71	71	2	42.9	42.9	1.1	234.94	0	323.31	3818600000	360	1.8602	1.46991	1.12273	F7FF45	F7FF45			0.0137975	0.0338914	0.0753824
Tln1		5	0.390441	1.01484	0.737857	-1.17356	-1.59492	-1.12957	0.674136	0.677833	0.402939	151	151	132	74	74	68.1	269.67	0	323.31	134300000000	3860	1.98929	1.62813	1.2754	G3V852;Q498D4;Q3B7U7	G3V852;Q498D4			0.0102497	0.0235434	0.0530396
Nhlrc2		5	0.762583	0.179183	0.866076	-1.45332	-1.50131	-0.806359	0.579184	0.274287	1.09968	17	17	17	32.8	32.8	32.8	78.561	0	66.1	1436400000	102	1.40616	0.980238	0.663402	D3ZLM5	D3ZLM5			0.03925	0.104655	0.217069
Pcnp	PEST proteolytic signal-containing nuclear protein	5	0.661214	0.452928	1.05484	-1.62475	-1.35461	-0.767848	0.433339	0.161715	0.983182	7	7	7	36	36	36	20.195	0	32.055	2274200000	93	1.40823	1.15686	0.826062	Q7TP40;A0A0H2UHW4	Q7TP40;A0A0H2UHW4			0.0390634	0.0696851	0.149258
Casp6	Caspase-6;Caspase-6 subunit p18;Caspase-6 subunit p11	5	0.533738	0.882214	1.00409	-1.55917	-1.29015	-0.978901	0.0955162	0.610393	0.702272	7	7	7	29.6	29.6	29.6	31.574	0	11.427	179700000	19	1.80394	1.60423	1.25225	Q6AZ23;O35397	Q6AZ23;O35397			0.0157058	0.0248754	0.0559435
Casc3	Protein CASC3	5	0.635345	0.392945	0.845382	-1.68235	-1.44711	-0.620715	0.223204	0.849633	0.803659	6	6	6	8.9	8.9	8.9	69.012	0	8.9855	156620000	18	1.37574	0.991663	0.673786	G3V793;Q8K3X0	G3V793;Q8K3X0			0.0420979	0.101938	0.211941
Phf6		5	0.411113	0.561162	1.00867	-1.5015	-1.41053	-0.843581	0.306615	0.30313	1.16492	9	9	9	33	33	33	41.097	0	17.079	351990000	27	1.39453	1.05757	0.734088	D3ZQV8;M0R464	D3ZQV8;M0R464			0.0403153	0.0875851	0.184464
Kif3a	Kinesin-like protein	5	0.369647	0.604685	0.97645	-1.47379	-1.67332	-0.637916	0.659544	0.445418	0.729286	20	20	18	31.6	31.6	28.1	78.207	0	79.364	1037600000	97	1.47249	1.10065	0.773833	A0A0G2JUD6;F1LQZ3;Q9WV62;Q2P9S3	A0A0G2JUD6;F1LQZ3			0.0336907	0.079314	0.168332
Rbm5	RNA-binding protein 5	5	0.499052	0.805501	0.546474	-1.32012	-1.81617	-0.594028	0.50013	0.366895	1.01226	10	10	9	16.8	16.8	15.7	92.351	0	44.463	321150000	23	1.32769	0.947009	0.633325	B2GV05;Q5EB71	B2GV05;Q5EB71			0.047023	0.112977	0.232635
Snrpa		5	0.87008	0.38409	0.867314	-1.18807	-1.45979	-1.12508	0.409587	0.0750623	1.16682	9	9	7	41.3	41.3	35.9	31.176	0	19.089	2545200000	73	1.46389	1.17762	0.845447	Q5U214	Q5U214			0.0343645	0.0664324	0.142742
Smek2		5	1.21744	0.247075	0.610995	-1.33645	-1.26648	-1.23107	0.558249	0.330032	0.870221	9	9	8	13.9	13.9	12.2	93.969	0	25.802	360560000	24	1.65209	1.30484	0.965228	D3ZCR4	D3ZCR4			0.0222797	0.0495633	0.108336
Xpo5		5	0.87505	0.270636	0.520683	-1.08913	-1.34306	-1.34517	0.447501	0.328459	1.33503	24	24	24	26.7	26.7	26.7	136.88	0	112.08	683410000	88	1.47379	0.953348	0.639048	D3ZQE8	D3ZQE8			0.03359	0.11134	0.229589
Hat1	Histone acetyltransferase type B catalytic subunit	5	0.849023	0.621721	0.855525	-1.06826	-1.34695	-1.51367	0.691993	0.353862	0.556757	4	4	4	14.1	14.1	14.1	49.241	0	11.675	101170000	20	2.42069	2.12298	1.75974	Q5M939	Q5M939			0.00379586	0.0075339	0.0173884
Srsf4		5	0.661489	0.469027	0.985498	-1.3233	-1.10335	-1.4554	0.197342	0.871476	0.697223	10	6	6	19.3	12.1	12.1	55.674	0	39.934	495940000	44	1.88296	1.5204	1.1713	G3V798;B1H240	G3V798;B1H240			0.013093	0.0301717	0.0674062
Diaph3		5	0.989871	0.420591	0.661767	-0.874386	-1.73956	-1.24306	0.52783	0.606607	0.650338	3	3	3	4.4	4.4	4.4	119.49	0	15.666	63539000	11	1.74647	1.38106	1.03769	F1LVW7;A0A0G2K8Y4	F1LVW7			0.0179279	0.0415853	0.0916875
Ylpm1	YLP motif-containing protein 1	5	0.476228	0.0420108	0.948898	-0.737313	-1.14405	-1.82783	0.719305	0.781577	0.741173	27	27	27	16.4	16.4	16.4	237.81	0	94.202	1201300000	137	1.34118	0.760966	0.46898	A0A0G2K678;A0A0G2JYQ3;F1LQJ1;P0CB49	A0A0G2K678;A0A0G2JYQ3;F1LQJ1;P0CB49			0.0455848	0.173394	0.339641
Armc1	Armadillo repeat-containing protein 1	5	0.670033	0.714996	0.902193	-1.302	-1.35268	-1.30744	0.751413	0.445709	0.477773	4	4	4	19.1	19.1	19.1	31.204	0	11.826	153590000	12	2.93552	2.5968	2.2289	B0BN83	B0BN83			0.00116006	0.00253046	0.00590337
Pwp1		5	0.386271	0.624605	0.468804	-1.6684	-0.660812	-1.44443	0.465603	0.762456	1.06591	7	7	7	18.8	18.8	18.8	55.809	0	41.758	342700000	30	1.52549	0.883653	0.576533	D4A1H8	D4A1H8			0.0298202	0.130721	0.265135
Map1b	Microtubule-associated protein 1B;MAP1B heavy chain;MAP1 light chain LC1	5	0.310427	0.778308	0.182138	-1.45565	-1.13083	-1.20001	0.849837	0.434565	1.23122	85	83	83	49.8	49	49	269.64	0	323.31	16882000000	1079	1.71741	0.879517	0.572853	F1LRL9;P15205;B0BNK3	F1LRL9;P15205			0.0191686	0.131972	0.267391
LOC100363915;Mat2a	S-adenosylmethionine synthase;S-adenosylmethionine synthase isoform type-2	5	0.0731949	0.114393	0.472985	-1.81817	-1.03824	-0.711853	0.92705	0.837796	1.14285	13	13	11	43	43	34.2	43.674	0	100.5	1967900000	121	1.50642	0.366159	0.158482	F1LRB8;P18298;Q6P688	F1LRB8;P18298;Q6P688			0.0311587	0.430369	0.694253
Arhgef2	Rho guanine nucleotide exchange factor 2	5	0.180008	0.682495	0.595971	-1.88885	-1.19423	-0.639738	0.618102	0.766988	0.879254	39	39	39	42.6	42.6	42.6	133.34	0	323.31	3999600000	314	1.37982	0.779541	0.485032	A0A0G2K0V4;Q5FVC2	A0A0G2K0V4;Q5FVC2			0.0417042	0.166134	0.327317
Pak4	Non-specific serine/threonine protein kinase	5	-0.285692	0.561001	0.614351	-1.43748	-1.09662	-1.13159	1.1882	0.747013	0.840811	10	10	10	21.9	21.9	21.9	64.749	0	69.402	281730000	39	1.59796	0.552093	0.295903	B5DF62;D4A280	B5DF62			0.0252371	0.280483	0.505938
Epb41l2		6	-0.376688	-0.716303	0.284976	-1.15482	-0.9163	-0.710124	1.08145	0.884986	1.62283	54	54	4	56.7	56.7	4.8	110.71	0	323.31	8398500000	535	1.41632	0.425103	0.199765	D3ZM69	D3ZM69			0.0383425	0.375748	0.631299
Pik3c2a		6	-0.142664	-0.461887	0.257665	-1.57628	-0.725331	-0.75669	1.1047	0.796646	1.50385	38	38	38	25.7	25.7	25.7	190.91	0	81.718	1413900000	157	1.36977	0.157182	0.0389286	D3ZTF6	D3ZTF6			0.0426805	0.696335	0.914264
Col4a1		6	-0.875915	-0.074376	-0.117774	-1.17796	-0.667199	-0.745669	1.69639	1.08407	0.878427	15	15	13	14.6	14.6	14	160.61	0	136.38	13778000000	193	1.40911	0.575284	0.314325	F1MA59;Q5FWY9	F1MA59			0.0389843	0.265899	0.484925
Matr3	Matrin-3	6	0.146206	0.029679	-0.456306	-0.751003	-0.869785	-1.50289	1.56183	1.08551	0.756761	38	38	38	52.2	52.2	52.2	94.501	0	323.31	11978000000	483	1.45386	0.133393	0.029165	A0A0G2JSR7;P43244;B5DEM0;Q6P6H1	A0A0G2JSR7;P43244;B5DEM0;Q6P6H1			0.0351674	0.735541	0.93505
Txndc9	Thioredoxin domain-containing protein 9	6	-0.111278	-0.139697	-0.649759	-0.770656	-0.717539	-1.31936	1.4685	0.994121	1.24567	10	10	10	43.4	43.4	43.4	26.288	0	36.107	1145000000	81	1.78273	0.651746	0.376596	Q5M8C7;Q6P9X7;Q8K581	Q5M8C7;Q6P9X7;Q8K581			0.0164919	0.222974	0.42015
Tbc1d2	TBC1 domain family member 2A	6	0.0483357	-0.66285	-0.570406	-0.793192	-0.588224	-1.20608	1.05952	1.33835	1.37454	11	11	11	14.3	14.3	14.3	104.97	0	19.075	393590000	35	1.73636	0.832817	0.531548	B5DFA1;D3ZSN8	B5DFA1;D3ZSN8			0.0183502	0.146955	0.294071
Wdr43		6	0.41935	-0.103637	-0.849697	-1.21511	-0.634126	-1.08435	1.04394	1.28316	1.14047	13	13	13	23.1	23.1	23.1	74.805	0	21.249	682150000	51	1.33646	0.248033	0.0845841	G3V920;Q4KLJ6	G3V920			0.0460829	0.564894	0.82303
Hnrnpa2b1	Heterogeneous nuclear ribonucleoproteins A2/B1	7	0.417778	0.737641	0.903431	-0.592142	-1.88026	-1.26644	0.540664	0.699928	0.439398	25	25	24	59.1	59.1	59.1	37.297	0	323.31	56697000000	979	1.36341	1.0717	0.747091	F1LNF1;A7VJC2-4;A7VJC2;F1LM82;A7VJC2-3;A7VJC2-2;B2GV69	F1LNF1;A7VJC2-4;A7VJC2;F1LM82;A7VJC2-3;A7VJC2-2			0.0433102	0.0847813	0.179023
Ncbp2	Nuclear cap-binding protein subunit 2	7	0.265719	0.777124	0.771782	-1.05085	-1.19702	-1.49664	0.910126	1.05964	-0.0398816	6	6	6	39.1	39.1	39.1	18.017	0	18.62	305560000	23	1.36308	0.953583	0.63926	B1WC40	B1WC40			0.0433431	0.11128	0.229477
Khdrbs1	KH domain-containing, RNA-binding, signal transduction-associated protein 1	7	0.227824	0.568443	1.16948	-0.889911	-1.48619	-1.36678	0.544031	1.02414	0.208972	11	11	11	28	28	28	48.315	0	182.28	4099100000	163	1.36152	1.02621	0.705308	Q91V33;Q920F3;F1LMN8;Q9JLP1	Q91V33			0.0434991	0.0941434	0.197102
		7	0.668962	0.771437	1.07944	-1.13478	-1.23577	-1.37724	0.888619	0.511216	-0.171884	43	43	43	45.7	45.7	45.7	135.65	0	291.39	3803400000	327	1.58805	1.46248	1.1156	A0A0G2K6Z8;D3ZRT6	A0A0G2K6Z8			0.0258196	0.0344762	0.0766302
Phgdh	D-3-phosphoglycerate dehydrogenase	7	0.825451	0.993163	0.95458	-1.25448	-1.1452	-1.36425	0.653928	0.476869	-0.140055	26	26	26	67	67	67	56.493	0	323.31	17702000000	549	1.97328	1.91835	1.55849	O08651	O08651			0.0106346	0.0120684	0.0276382
Smoc1		7	1.02433	0.863681	0.637098	-0.970492	-1.31253	-1.46138	0.550786	0.819986	-0.151485	7	7	7	17	17	17	49.777	0	13.844	238640000	25	1.58185	1.45951	1.11275	Q6IE50	Q6IE50			0.0261909	0.0347128	0.0771347
Lig3	DNA ligase	7	0.787034	0.912909	0.976344	-1.16386	-1.20526	-1.25268	0.768324	0.641534	-0.464348	10	10	10	12.6	12.6	12.6	105.44	0	8.6292	436590000	21	1.39354	1.36469	1.02208	Q5U2M4;A0A096MKE9	Q5U2M4;A0A096MKE9			0.0404073	0.0431827	0.095043
Stat1;Stat4	Signal transducer and activator of transcription	7	1.08233	0.650389	0.824015	-1.24463	-1.51854	-1.00539	0.491377	0.784318	-0.0638696	32	32	32	52.2	52.2	52.2	87.249	0	283.14	6891700000	358	1.69011	1.56712	1.21636	F1M9D6;Q9QXK0;Q6P6Q7;A0A0G2JX93;Q7TP57;O70406	F1M9D6;Q9QXK0;Q6P6Q7;A0A0G2JX93;Q7TP57			0.0204122	0.0270944	0.0607631
Ddx42		7	0.188466	1.15522	1.34168	-1.13686	-1.1195	-1.32674	0.36587	0.618459	-0.0866018	20	20	20	30	30	30	102.07	0	109.56	1081400000	103	1.32404	1.31105	0.971105	D4A031	D4A031			0.0474198	0.0488596	0.10688
Rps10;RGD1564698;LOC100360905;RGD1561871	40S ribosomal protein S10	7	0.355823	1.01997	1.4136	-0.926317	-1.42174	-1.27262	0.0501826	0.271777	0.509338	12	11	11	63.6	59.4	59.4	18.916	0	122.5	7840600000	269	1.49489	1.49614	1.14794	P63326;F1LT36;A0A0H2UI18;D3ZJY5;D3ZH53;D3ZCN9;Q7TP86;D4A5N7	P63326;F1LT36;A0A0H2UI18;D3ZJY5;D3ZH53			0.0319971	0.0319051	0.0711312
Gcom1;Polr2m	DNA-directed RNA polymerase II subunit GRINL1A	7	0.104024	0.799262	1.17328	-1.27224	-1.49173	-0.953371	1.00447	0.248902	0.387407	6	6	6	10.5	10.5	10.5	86.894	0	16.018	231800000	32	1.31728	1.04598	0.72343	H8Y6S5;Q91XQ4;D4A3N7	H8Y6S5;Q91XQ4			0.0481637	0.0899539	0.189047
Tns1		7	0.389812	1.14147	1.4449	-1.00395	-1.35797	-1.015	0.497985	0.352883	-0.450134	60	60	56	41.7	41.7	40.6	203.91	0	323.31	7351800000	532	1.23982	1.35196	1.00997	F1LN42;Q62783	F1LN42			0.0575678	0.0444672	0.0977305
Rsu1		7	0.348848	0.90873	1.48786	-1.08518	-1.57212	-0.902478	0.524101	0.315935	-0.0256945	13	13	13	53.8	53.8	53.8	31.337	0	153.17	2257400000	211	1.32754	1.33757	0.99628	D4A8F2	D4A8F2			0.0470392	0.0459653	0.10086
Zmynd8		7	0.786456	0.510261	1.61792	-0.759916	-1.56435	-1.14124	0.406396	0.0916405	0.0528371	8	8	8	9.2	9.2	9.2	130.09	0	27.289	243200000	31	1.31429	1.39131	1.04748	A0A0G2K9F7;A8C4G9;K0J5S5;Q5XI91	A0A0G2K9F7;A8C4G9			0.0484965	0.0406153	0.0896437
RGD1308139		7	0.395559	0.928456	1.61755	-1.06345	-1.08563	-1.26471	0.64986	0.00588654	-0.183514	5	5	5	8.1	8.1	8.1	70.085	0	6.3742	152270000	20	1.25978	1.35587	1.01369	D3ZXL5	D3ZXL5			0.0549819	0.0440687	0.0968969
Tmpo	Lamina-associated polypeptide 2, isoform beta	7	0.594799	1.3054	1.36189	-1.30365	-0.923267	-1.23244	0.032428	0.05148	0.113367	18	18	18	52.2	52.2	52.2	50.277	0	283.54	2776600000	154	1.87353	2.02254	1.66083	R9PXU0;Q62733	R9PXU0;Q62733			0.0133804	0.00949424	0.0218358
Morf4l2	Mortality factor 4-like protein 2	7	0.781661	1.01515	1.34757	-1.4847	-0.738178	-1.31069	0.255183	0.0923457	0.0416683	7	7	7	21.2	21.2	21.2	32.213	0	10.468	172190000	24	1.817	1.92519	1.5652	Q6QI89	Q6QI89			0.0152405	0.0118798	0.0272145
Gars	Glycine--tRNA ligase	7	0.858637	0.922389	0.998124	-1.33218	-0.972541	-1.51211	0.52792	0.249866	0.259894	35	35	35	52.6	52.6	52.6	81.792	0	323.31	24351000000	672	2.3699	2.29536	1.93002	G3V7G8;Q5I0G4	G3V7G8;Q5I0G4			0.00426678	0.00506571	0.0117484
Anp32a	Acidic leucine-rich nuclear phosphoprotein 32 family member A	7	0.746126	1.41836	0.977658	-0.661259	-1.07041	-1.63095	-0.0607591	0.448417	-0.167184	12	12	10	50.2	50.2	47	28.565	0	112.74	6770700000	158	1.40632	1.55386	1.20356	Q5PPH9;A0A0G2K7X0;F7EL36;P49911	Q5PPH9;A0A0G2K7X0;F7EL36;P49911			0.0392356	0.0279344	0.0625806
Ptbp1		7	0.870721	1.03819	1.12833	-0.971341	-1.15627	-1.55086	0.235555	0.386503	0.0191634	20	20	1	65.1	65.1	4.5	56.935	0	323.31	18740000000	457	2.18949	2.23347	1.86882	D3ZB30;F1LM18;Q6P736	D3ZB30;F1LM18;Q6P736			0.00646413	0.00584158	0.0135263
Trim28	Transcription intermediary factor 1-beta	7	0.50018	0.899712	0.867761	-1.13792	-1.00012	-1.68994	0.227334	0.885832	0.447163	33	33	33	57	57	57	88.955	0	323.31	10004000000	659	1.69847	1.43952	1.09358	O08629	O08629			0.020023	0.036348	0.0806158
Pold3		7	0.947884	0.846056	1.10464	-0.751215	-1.00358	-1.80774	0.266832	-0.0980849	0.495214	3	3	3	7.6	7.6	7.6	50.844	0	6.9931	88666000	9	1.4824	1.52858	1.17918	Q4V7D0;F6T1W7	Q4V7D0;F6T1W7			0.0329306	0.0296087	0.0661942
Hdgf	Hepatoma-derived growth factor	7	1.27399	1.13574	0.828185	-0.53618	-0.788556	-1.8043	0.257558	-0.409985	0.0435467	16	15	15	68.8	65.4	65.4	26.488	0	323.31	9473600000	385	1.21571	1.42368	1.07841	Q8VHK7;F1LPC7;M0R3J6	Q8VHK7;F1LPC7			0.0608541	0.0376981	0.0834815
Cd44	CD44 antigen	7	1.27236	1.37961	0.625003	-0.548579	-0.983938	-1.64108	-0.238058	-0.104676	0.239354	12	12	12	18.6	18.6	18.6	52.853	0	265.62	11293000000	310	1.31688	1.52368	1.17446	D3ZGF1;F1LSA1;O08779;P26051;O70509;P26051-2;Q62913;Q9EP99;Q9ERN2	D3ZGF1;F1LSA1;O08779;P26051;O70509;P26051-2			0.0482081	0.0299447	0.0669175
Mcm7	DNA helicase	7	1.33631	1.04742	1.0833	-0.493839	-0.557505	-1.5407	0.00076119	-0.999888	0.124144	10	10	10	16.6	16.6	16.6	81.062	0	32.717	436690000	46	1.09117	1.39382	1.04987	Q6AYN8;Q1PS21	Q6AYN8;Q1PS21			0.0810644	0.0403813	0.0891518
		7	1.27072	0.924828	1.12176	-0.53294	-0.808958	-1.82037	-0.114305	0.0321628	-0.0728968	11	11	9	12.9	12.9	11.2	108.08	0	37.733	413950000	39	1.36086	1.57593	1.22487	A0A0G2JUG7;F1LPA3;Q76M68	A0A0G2JUG7			0.0435652	0.0265503	0.059584
Ptpn14	Protein-tyrosine-phosphatase	7	1.43533	0.831735	0.860968	-0.55594	-0.991734	-1.78193	0.168543	-0.0539769	0.0870092	15	15	14	17.2	17.2	16.1	134.78	0	37.113	659920000	66	1.33569	1.48761	1.13974	A0A0G2K2N0;D3ZSL5	A0A0G2K2N0;D3ZSL5			0.0461647	0.0325379	0.072487
Rfc4		7	1.00603	1.04268	1.26815	-0.525553	-1.271	-1.53995	-0.132919	0.0691606	0.0833946	4	4	4	11.8	11.8	11.8	39.956	0	6.4699	44377000	10	1.66404	1.84825	1.48982	B4F778	B4F778			0.021675	0.0141824	0.0323728
Tcea1	Transcription elongation factor A protein 1	7	0.87062	0.932098	1.53982	-0.722105	-1.65498	-0.795401	0.173291	-0.272032	-0.071308	15	15	15	60.5	60.5	60.5	33.893	0	66.766	1507600000	110	1.41515	1.63251	1.27964	Q4KLL0;Q63799	Q4KLL0			0.0384459	0.0233072	0.0525243
Cnn1	Calponin-1	7	0.556113	1.06147	1.69394	-0.659889	-1.29195	-1.19515	0.263485	-0.19702	-0.23099	18	17	17	71.4	68.7	68.7	33.343	0	323.31	33850000000	677	1.33261	1.54923	1.19909	Q08290	Q08290			0.0464933	0.0282338	0.0632281
Aqp1	Aquaporin-1	7	1.03882	1.09558	1.08094	-0.432645	-1.89604	-0.842434	-0.15021	0.179603	-0.0736232	3	3	3	13.4	13.4	13.4	28.856	0	15.061	25531000	6	1.23522	1.43248	1.08684	P29975;A0A0G2K3E0	P29975;A0A0G2K3E0			0.0581808	0.036942	0.0818766
LOC100910130;Fam50a		7	0.935263	1.17394	1.34174	-0.306121	-1.28829	-1.02128	0.0449088	-1.05697	0.176814	9	9	6	30.1	30.1	20.4	40.209	0	16.959	500600000	29	1.08308	1.38198	1.03857	G3V9M8;B5DF16	G3V9M8;B5DF16			0.0825886	0.0414973	0.0915019
Dctn1	Dynactin subunit 1	7	0.800006	1.24904	1.2945	-0.501527	-1.71497	-0.951847	-0.00671613	-0.159306	-0.00917317	60	60	60	59.4	59.4	59.4	139.84	0	323.31	11112000000	597	1.41093	1.62911	1.27635	A0A0G2K428;D4A8U7;P28023	A0A0G2K428;D4A8U7;P28023			0.0388213	0.0234904	0.0529237
Rcc2		7	0.915743	1.2713	1.17724	-0.129759	-1.46206	-1.29359	0.230546	-0.23915	-0.470271	16	16	16	45	45	45	46.652	0	114.01	2693100000	150	1.14691	1.40772	1.06315	F1LVV4	F1LVV4			0.0713001	0.0391093	0.0864669
		7	1.16577	1.00142	0.680865	-0.518695	-1.65399	-1.35476	0.573439	0.057598	0.0483442	19	19	19	16.8	16.8	16.8	155.46	0	71.779	552150000	43	1.35807	1.40278	1.05843	A0A0G2JWH3	A0A0G2JWH3			0.043846	0.0395567	0.0874118
Smek1		7	1.18377	0.887895	0.799149	-0.932407	-1.3914	-1.23301	0.892351	0.0160101	-0.222363	7	6	6	14.4	12.5	12.5	82.373	0	22.236	167030000	29	1.43869	1.48005	1.13247	D4ABC4	D4ABC4			0.0364175	0.0331093	0.0737106
Eif4g2		7	1.07404	0.697526	1.18702	-0.546287	-1.27132	-1.55897	0.583323	0.272207	-0.437542	37	37	37	43.8	43.8	43.8	102.11	0	323.31	5219300000	378	1.22318	1.33185	0.990852	F1LN59;Q5BJU2;Q1RP76;REV__P15129	F1LN59			0.0598164	0.0465747	0.102129
Rnasel		7	1.07659	0.938258	1.1384	-0.798129	-0.815415	-1.52538	0.687743	0.0467942	-0.748859	4	4	4	7.3	7.3	7.3	83.209	0	22.332	52976000	7	1.13483	1.32747	0.98669	Q80WM6;G3V915	Q80WM6;G3V915			0.0733111	0.0470468	0.103112
Tsg101	Tumor susceptibility gene 101 protein	7	1.32253	1.18577	1.17909	-1.48062	-0.248775	-0.728783	-0.712807	-0.376416	-0.139988	14	14	14	34	34	34	44.077	0	48.941	1647100000	101	1.38814	1.72274	1.36731	F1LRB7;Q6IRE4	F1LRB7;Q6IRE4			0.0409129	0.0189348	0.042923
Ano6	Anoctamin	7	1.24581	0.998806	1.14083	-1.60817	-0.136424	-1.11843	-0.325919	-0.387749	0.191243	16	16	16	19.5	19.5	19.5	105.84	0	33.121	817110000	56	1.1561	1.42236	1.07715	A0A0G2K1M7;F1M5Z5	A0A0G2K1M7;F1M5Z5			0.0698072	0.0378129	0.083724
Sdf2l1		7	1.37984	1.00749	0.926955	-1.91444	-0.466859	-0.483287	-0.301436	-0.114701	-0.0335678	9	9	9	36.8	36.8	36.8	23.403	0	17.589	936090000	57	1.07513	1.33175	0.990751	D4A9Y0	D4A9Y0			0.0841143	0.0465854	0.102153
Pak3	Serine/threonine-protein kinase PAK 3	7	1.08809	1.14251	1.26421	-1.78539	-0.40849	-0.55356	-0.0875915	-0.215274	-0.444506	18	6	6	42.8	16.2	16.2	60.71	0	22.834	135690000	18	1.22166	1.51385	1.16498	Q62829	Q62829			0.0600261	0.0306302	0.0683943
Smchd1		7	0.989289	1.32354	1.26738	-1.5078	-0.794436	-0.798628	-0.281197	-0.204447	0.00631052	15	15	15	7.6	7.6	7.6	225.99	0	15.029	265710000	37	1.88111	2.14397	1.78045	D4AAG8	D4AAG8			0.0131489	0.00717844	0.0165787
Mcm6	DNA helicase	7	1.06766	0.945695	1.24441	-1.74845	-0.929578	-0.656191	0.116453	-0.179803	0.139807	26	26	26	37	37	37	92.814	0	84.829	914040000	85	1.53797	1.71232	1.35717	A9CMB8;A9CMC9;Q62724	A9CMB8;A9CMC9			0.0289754	0.0193946	0.043937
Nsun2		7	0.928574	1.17149	1.349	-1.60223	-0.867249	-0.772233	0.028703	-0.0928251	-0.143228	31	31	31	51.7	51.7	51.7	88.09	0	261.64	2760700000	197	1.78387	2.00658	1.64513	D4A3S8	D4A3S8			0.0164486	0.00984963	0.0226397
Mthfd1	C-1-tetrahydrofolate synthase, cytoplasmic;Methylenetetrahydrofolate dehydrogenase;Methenyltetrahydrofolate cyclohydrolase;Formyltetrahydrofolate synthetase;C-1-tetrahydrofolate synthase, cytoplasmic, N-terminally processed	7	1.06359	0.877891	1.13062	-1.89836	-0.68608	-0.73031	-0.273935	0.216547	0.300029	38	38	16	48.6	48.6	22	100.96	0	258.08	9397000000	430	1.25129	1.39597	1.05192	G3V6S5;Q5EBC3;P27653	G3V6S5;Q5EBC3;P27653			0.0560673	0.0401819	0.0887319
Ttc39c	Tetratricopeptide repeat protein 39C	7	0.774595	1.36962	0.928063	-1.80686	-0.63053	-0.897884	-0.214589	0.369629	0.107967	2	2	2	7.9	7.9	7.9	61.767	0	6.1873	32059000	4	1.27928	1.41959	1.0745	A0A0G2JXC8;Q0VGK2	A0A0G2JXC8;Q0VGK2			0.0525678	0.0380548	0.0842364
Mcm4		7	0.733733	1.1754	1.22877	-1.85872	-0.602565	-0.858389	0.00634392	0.0891418	0.0862844	18	18	17	25.9	25.9	25.1	96.57	0	60.186	597280000	55	1.33322	1.48901	1.14109	G3V681	G3V681			0.046428	0.0324332	0.072262
H2afz;H2afv	Histone H2A;Histone H2A.Z	7	0.7644	1.39484	1.26109	-1.22635	-1.17959	-0.671793	-0.671866	0.281868	0.0474038	6	4	4	54.3	47.2	47.2	13.421	0	132.46	4130700000	54	1.42049	1.66392	1.31012	A0A0A0MXW3;D4AEC0;P0C0S7	A0A0A0MXW3;D4AEC0;P0C0S7			0.0379761	0.021681	0.0489644
Hist1h1b	Histone H1.5	7	0.412262	1.3566	1.27601	-1.55909	-0.838101	-0.909226	-0.406702	0.414543	0.253696	4	3	3	21.6	17.6	17.6	22.649	0	13.051	917180000	45	1.21311	1.35446	1.01235	D3ZBN0	D3ZBN0			0.0612195	0.044212	0.0971964
G3bp1		7	0.438489	1.48673	1.1871	-1.27946	-0.716195	-1.27878	-0.433094	0.435854	0.159361	17	17	15	43.4	43.4	40.2	51.786	0	237.19	11350000000	425	1.24217	1.40254	1.0582	D3ZYS7;F1M2M6	D3ZYS7			0.0572572	0.0395786	0.0874581
Ltbp2	Latent-transforming growth factor beta-binding protein 2	7	0.704935	1.20375	0.737084	-1.79061	-1.27194	-0.549542	0.100933	0.436648	0.42873	30	30	28	19.5	19.5	18.7	190.14	0	136.94	2746600000	225	1.35053	1.31688	0.976636	A0A0G2KAU7;F1M7L7;A0A0G2K1G5;O35806;O35283	A0A0G2KAU7;F1M7L7;A0A0G2K1G5;O35806			0.0446139	0.0482081	0.105527
Cdk1	Cyclin-dependent kinase 1	7	0.629517	0.951298	0.841821	-1.77409	-1.36242	-0.621412	0.508124	0.419794	0.407362	12	11	10	48.8	46.1	42.4	34.134	0	45.331	627980000	43	1.54905	1.38618	1.04258	P39951	P39951			0.0282455	0.0410979	0.0906609
Isg20l2	Interferon-stimulated 20 kDa exonuclease-like 2	7	0.706803	1.04878	1.1814	-1.7069	-1.3136	-0.452144	0.0635976	0.0846743	0.387385	5	5	5	13.8	13.8	13.8	41.31	0	12.436	139460000	24	1.34861	1.42859	1.08311	Q6AXU3	Q6AXU3			0.0448116	0.0372743	0.0825829
Raver1	Ribonucleoprotein PTB-binding 1	7	0.454846	1.11317	1.18725	-1.39228	-1.39341	-0.964272	0.385963	0.291803	0.316925	10	10	10	19.1	19.1	19.1	79.288	0	32.97	543830000	51	1.87149	1.81687	1.45914	Q5XI28	Q5XI28			0.0134434	0.0152451	0.0347424
Irf2bpl	Interferon regulatory factor 2-binding protein-like	7	0.833011	0.877802	1.15216	-1.47667	-1.60305	-0.494557	0.223255	0.0952519	0.392789	14	14	11	21.6	21.6	15.3	81.367	0	62.492	630300000	94	1.46769	1.50193	1.15351	M0R567;Q5EIC4	M0R567;Q5EIC4			0.0340651	0.0314826	0.0702247
Mcm3	DNA helicase	7	0.845335	0.989031	1.00588	-1.49088	-1.59821	-0.489113	0.00589038	0.291201	0.440868	28	28	28	44.5	44.5	44.5	91.658	0	70.175	864140000	103	1.45166	1.47922	1.13167	D3ZFP4	D3ZFP4			0.035346	0.0331726	0.0738465
Impdh2	Inosine-5-monophosphate dehydrogenase;Inosine-5-monophosphate dehydrogenase 2	7	0.577976	1.1464	1.15262	-1.51912	-1.54352	-0.445408	0.202317	0.244236	0.184502	19	19	17	46.1	46.1	42.8	55.798	0	98.162	3976800000	189	1.35067	1.40764	1.06307	Q6P9U9;E9PU28	Q6P9U9;E9PU28			0.0445995	0.0391165	0.0864829
Tmsb4x	Thymosin beta-4;Hematopoietic system regulatory peptide	7	0.759461	1.23768	1.05731	-1.54661	-1.51697	-0.230187	0.153413	0.046229	0.0396767	2	1	1	40.9	25	25	5.0526	0	7.5642	76667000000	438	1.20683	1.35265	1.01063	P62329	P62329			0.0621112	0.0443966	0.0975821
Slirp		7	0.52918	0.477335	1.33118	-1.83004	-0.858027	-0.986801	0.297472	0.393255	0.646455	4	4	4	36	36	36	12.576	0	22.043	720760000	53	1.304	1.15176	0.821307	D4A4W6	D4A4W6			0.0496592	0.0705083	0.150901
Smarcc1		7	0.831295	0.773381	1.02955	-1.91651	-1.12421	-0.595614	0.20934	0.372293	0.420485	28	18	18	31.2	22.2	22.2	120.5	0	96.942	908640000	103	1.39179	1.34613	1.00443	D3ZJU5;A0A0G2K9D6	D3ZJU5;A0A0G2K9D6			0.0405705	0.0450682	0.0989851
Ubr7		7	0.941297	0.759178	1.15041	-1.90684	-1.00861	-0.596789	0.410053	0.0759924	0.17531	5	5	5	12.2	12.2	12.2	48.207	0	7.6949	144080000	22	1.33344	1.38323	1.03976	Q642A8;A0A0G2K9Q8	Q642A8;A0A0G2K9Q8			0.0464045	0.041378	0.0912515
Adnp	Activity-dependent neuroprotector homeobox protein	7	0.721862	0.865951	1.4371	-1.66967	-1.0263	-0.842313	0.300928	0.0996298	0.112818	18	18	18	18.1	18.1	18.1	123.62	0	38.599	796100000	75	1.59734	1.67891	1.32468	Q9JKL8	Q9JKL8			0.0252732	0.0209455	0.04735
Srp19		7	0.589001	0.733827	1.62147	-1.50219	-1.23742	-0.727076	0.303101	0.2725	-0.0532093	5	5	5	45.1	45.1	45.1	16.138	0	109.53	803590000	56	1.34596	1.42909	1.08359	B2RZ66	B2RZ66			0.0450858	0.0372315	0.0824917
Cnot2		7	0.664142	0.83581	1.61933	-1.36943	-1.44748	-0.478337	-0.0451829	0.0321997	0.188937	10	10	10	26.9	26.9	26.9	59.71	0	25.499	413660000	44	1.27685	1.43426	1.08855	A0A0G2K717;Q5PPJ8;A0A0G2KB82	A0A0G2K717;Q5PPJ8;A0A0G2KB82			0.0528628	0.0367909	0.0815549
Srpk1		7	0.795932	0.630691	1.46636	-1.6154	-1.2467	-0.643925	-0.0279068	0.190245	0.450698	17	17	15	30.2	30.2	27.6	73.763	0	45.104	1152900000	105	1.3628	1.42396	1.07868	E9PTN4;A0A0U1RRU0;Q4KLN3	E9PTN4;A0A0U1RRU0;Q4KLN3			0.0433711	0.0376738	0.0834296
Fen1	Flap endonuclease 1	7	0.951108	0.923532	1.12345	-1.59704	-1.23271	-0.820964	0.0495283	0.462713	0.140386	7	7	7	21.6	21.6	21.6	42.608	0	64.686	472150000	42	1.92087	1.96403	1.60333	Q5XIP6	Q5XIP6			0.0119986	0.0108635	0.024927
Lmnb1	Lamin-B1	7	0.718877	0.97797	1.25446	-1.47142	-1.34257	-0.786313	-0.171296	0.437488	0.382802	50	49	46	67.5	67.5	62.9	66.686	0	323.31	12984000000	593	1.64998	1.69731	1.34257	G3V7U4;P70615	G3V7U4;P70615			0.0223882	0.0200766	0.0454391
Ythdf2		7	0.661945	0.777283	1.28877	-1.50035	-1.26043	-1.00072	0.518762	0.421655	0.0930873	16	14	12	34.7	31.6	27.3	62.339	0	89.645	1603900000	111	1.87915	1.81203	1.45441	B2GUU1;Q1JU70;E9PU11	B2GUU1;Q1JU70;E9PU11			0.0132084	0.0154159	0.0351229
Hnrnpll		7	0.75719	0.656462	1.21452	-1.50449	-1.23587	-0.984302	-0.106258	0.71613	0.486617	23	23	23	56.2	56.2	56.2	64.362	0	237.79	2519800000	137	1.61317	1.53135	1.18184	D4A3E1	D4A3E1			0.0243686	0.0294205	0.06579
Thumpd1		7	0.735694	1.15031	0.724565	-1.38612	-1.62859	-0.615609	0.771808	0.249476	-0.00153723	18	18	18	65.7	65.7	65.7	38.916	0	143.56	1530400000	129	1.3621	1.31207	0.972075	Q5M943;F7FA68;A0A0G2JZB6	Q5M943;F7FA68			0.043441	0.048745	0.106641
Cadm4	Cell adhesion molecule 4	7	1.01726	1.24226	1.00576	-1.55559	-0.913335	-0.867289	0.53025	-0.323276	-0.136046	11	11	11	38.5	38.5	38.5	42.057	0	76.588	659640000	41	1.55592	1.73121	1.37556	F1M7V6;Q1WIM1	F1M7V6;Q1WIM1			0.0278023	0.0185691	0.0421153
Iars		7	0.9668	0.87673	0.595154	-1.48239	-1.50287	-0.778583	0.873685	0.31207	0.139405	57	57	57	55.1	55.1	55.1	144.28	0	323.31	17784000000	819	1.57767	1.41745	1.07245	F1LS86;A0A0G2JVL8;A0A0G2JZH2;Q5BJR3	F1LS86;A0A0G2JVL8			0.0264442	0.0382428	0.084635
Xrn2		7	0.970399	1.04939	0.957274	-1.19582	-1.50177	-0.679736	0.869401	-0.351798	-0.117347	29	29	29	38.2	38.2	38.2	108.65	0	222.72	2903200000	173	1.24121	1.35344	1.01138	D4A914	D4A914			0.0573839	0.0443159	0.0974137
		7	1.04134	1.07052	0.927298	-1.52137	-1.18094	-0.820107	0.667146	0.0896879	-0.273577	45	45	45	41.3	41.3	41.3	165.21	0	323.31	2598700000	194	1.58001	1.66889	1.31495	A0A0G2JWB6;A0A0G2KAH2;Q99MG0	A0A0G2JWB6;A0A0G2KAH2			0.0263021	0.0214343	0.0484228
Sf3a1		7	1.10716	1.17936	0.796809	-1.43537	-0.994258	-1.03663	0.653129	0.1494	-0.419586	32	32	32	47.9	47.9	47.9	88.587	0	295.11	5521700000	361	1.51888	1.63123	1.2784	D3ZQM0	D3ZQM0			0.0302775	0.023376	0.0526744
Hmg1l1;LOC681718;Hmgb1;RGD1563668;LOC100911637	High mobility group protein B1	7	0.842694	1.4312	1.18463	-1.30334	-1.14018	-0.897461	0.0806939	-0.0363625	-0.161883	11	11	9	37.6	37.6	30	24.677	0	166.16	16562000000	248	2.16658	2.37379	2.00766	D3ZCR3;A0A0G2K6P4;F1MA29;B4F758;P63159;D3ZXR5;D3ZC69;M0R7R5;F1LNG6;Q7TPK9;D4A6A9;D3ZLG3;D3ZGW6;D3ZIU9;A0A0G2K6M3;F1M4J9	D3ZCR3;A0A0G2K6P4;F1MA29;B4F758;P63159;D3ZXR5;D3ZC69;M0R7R5			0.00681428	0.00422873	0.00982517
Colgalt1		7	0.654299	1.50443	0.93218	-1.39828	-1.10864	-0.933668	0.536992	0.103468	-0.290786	24	24	24	49.3	49.3	49.3	71.114	0	197.06	3755900000	197	1.47697	1.59702	1.24527	B1H282	B1H282			0.0333449	0.0252918	0.0568499
Serbp1	Plasminogen activator inhibitor 1 RNA-binding protein;Plasminogen activator inhibitor 1 RNA-binding protein, N-terminally processed	7	0.822397	1.02271	1.14401	-1.19816	-1.50921	-1.03166	0.273615	0.199149	0.277146	27	27	2	62.2	62.2	9.8	44.754	0	323.31	17523000000	635	2.49325	2.50586	2.13861	Q6AXS5	Q6AXS5			0.00321181	0.0031199	0.00726758
Nasp	Nuclear autoantigenic sperm protein	7	0.906272	0.777144	1.22494	-1.41022	-1.50734	-0.749237	0.424506	0.0771327	0.25679	22	22	22	34	34	34	84.199	0	245.12	2371000000	171	1.79718	1.81335	1.4557	Q66HD3	Q66HD3			0.0159522	0.0153692	0.0350187
Eif5	Eukaryotic translation initiation factor 5	7	1.05272	0.817645	1.10694	-1.26438	-1.46979	-1.0177	0.219475	0.254719	0.300366	24	24	24	52	52	52	48.954	0	155.64	10007000000	541	2.57732	2.58254	2.21473	Q07205	Q07205			0.00264655	0.00261493	0.00609916
Sdc2	Syndecan;Syndecan-2	7	1.08571	0.999764	0.926447	-1.12361	-1.35301	-1.06891	-0.0441093	-0.239767	0.817477	6	6	6	29.4	29.4	29.4	23.219	0	9.1435	673130000	38	1.59547	1.67223	1.31819	Q6IRK3;P34900	Q6IRK3;P34900			0.0253822	0.0212701	0.0480629
Hnrnpa1;Hnrpa1	Heterogeneous nuclear ribonucleoprotein A1;Heterogeneous nuclear ribonucleoprotein A1, N-terminally processed	7	0.674188	0.832304	1.10637	-1.32813	-1.55959	-0.954953	0.325324	0.505311	0.399166	24	23	21	62.9	62.9	62.9	33.619	0	323.31	30945000000	547	2.143	2.00412	1.64272	Q6P6G9;Q5I0M7;P04256;D4ACJ7;A0A0G2K3G4;F1M2S4;F1M6C7	Q6P6G9;Q5I0M7;P04256			0.00719449	0.00990558	0.0227656
Smc4	Structural maintenance of chromosomes protein	7	1.01091	1.03171	1.12385	-0.947848	-1.64115	-0.988223	0.265933	0.0949811	0.0498301	30	30	30	25.6	25.6	25.6	146.8	0	81.59	2178500000	68	2.06497	2.16661	1.80279	F1MAD9;Q32PX5	F1MAD9			0.00861053	0.00681381	0.0157474
Ppp1r18		7	0.933516	0.73418	1.14684	-0.957209	-1.72329	-1.04602	0.218658	0.401394	0.291927	22	22	22	42.7	42.7	42.7	65.568	0	205.81	4028000000	243	1.87014	1.84103	1.48276	G3V629;A0A0G2K8B3;A0A0G2JV45	G3V629;A0A0G2K8B3			0.0134853	0.0144202	0.0329033
Stmn1	Stathmin	7	0.897506	1.06769	1.35961	-1.37006	-1.07515	-1.05256	-0.094644	0.0330107	0.234595	9	9	7	51.7	51.7	45.6	17.288	0	20.563	4531000000	143	2.32026	2.47261	2.10562	P13668;A0A096MK73;Q568Y8;P63043-2;P63043;P63043-3;Q9JHU6	P13668;A0A096MK73			0.00478344	0.00336814	0.00784115
Smc1a	Structural maintenance of chromosomes protein;Structural maintenance of chromosomes protein 1A	7	1.21044	1.16512	1.03755	-1.42083	-1.14718	-0.812146	0.0333773	0.193911	-0.260253	35	35	35	31.9	31.9	31.9	142.95	0	112.44	1655200000	134	2.12174	2.31412	1.94858	F1LSS1;Q9Z1M9	F1LSS1;Q9Z1M9			0.00755544	0.00485154	0.0112569
Mcm5	DNA helicase	7	1.00925	1.10598	1.36055	-1.35599	-1.08709	-0.91421	0.114466	-0.0435781	-0.189376	14	14	14	22.8	22.8	22.8	82.465	0	36.687	543900000	36	2.3677	2.57481	2.20706	B2GUX3;A0A0G2JY07;E9PTS4	B2GUX3;A0A0G2JY07			0.00428845	0.00266189	0.00620783
Ddx5		7	0.915651	1.12167	1.30748	-1.5228	-0.947714	-0.9337	0.0490004	0.231726	-0.221317	37	36	29	59.1	59.1	47.1	69.111	0	323.31	17494000000	562	1.9407	2.11649	1.75335	B6DTP5;Q6AYI1;O88757	B6DTP5;Q6AYI1			0.011463	0.00764733	0.0176462
Fmr1	Fragile X mental retardation protein 1 homolog	7	1.05425	0.836109	1.33046	-1.39169	-1.25701	-0.923233	0.179281	0.125937	0.0459007	17	15	15	29.9	27.2	27.2	65.63	0	127.6	1032100000	98	2.26269	2.37701	2.01085	Q80WE1-2;Q80WE1;A0A0G2JZV8;A0A067XMV0;Q8VD80;A0A067XMK2;A0A067XNH0;A0A067XMN7;A0A067XMV1;Q6GWE1	Q80WE1-2;Q80WE1;A0A0G2JZV8			0.00546148	0.00419749	0.00975326
Hnrnpu		7	1.22491	0.924892	1.19643	-1.22418	-1.3521	-0.929039	-0.0160513	0.147577	0.0275612	32	32	32	44.4	44.4	44.4	87.731	0	323.31	32735000000	732	2.5349	2.6896	2.32112	Q6IMY8;Q63555;A0A0G2JZ52	Q6IMY8;Q63555;A0A0G2JZ52			0.0029181	0.00204362	0.00477397
Mcm2	DNA helicase	7	1.31652	0.925973	1.2932	-1.1155	-0.947689	-1.25444	-0.082074	-0.0184264	-0.117571	17	17	17	24.3	24.3	24.3	102.14	0	52.524	557540000	60	2.59832	2.822	2.45283	D3ZP96	D3ZP96			0.00252162	0.00150661	0.00352509
Adamtsl3		7	0.8732	1.19771	1.21331	-0.981104	-1.38926	-1.13845	-0.167074	0.332931	0.0587431	19	19	19	13	13	13	186.5	0	38.721	629750000	69	2.17492	2.31702	1.95146	D4ADD4	D4ADD4			0.00668467	0.00481926	0.0111825
Rrm1	Ribonucleoside-diphosphate reductase	7	1.36298	1.00615	1.05346	-1.08163	-1.40307	-0.91146	0.0752977	-0.192319	0.0905918	21	21	21	32.2	32.2	32.2	90.292	0	52.312	899050000	87	2.25667	2.44761	2.08083	Q5U2Q5	Q5U2Q5			0.00553771	0.00356771	0.00830176
Arpc5	Actin-related protein 2/3 complex subunit 5	7	1.14237	1.14749	0.997375	-1.25933	-1.39637	-0.791894	0.426055	-0.176547	-0.089139	11	11	11	72.8	72.8	72.8	16.32	0	272.34	6304900000	222	1.90825	2.06455	1.70217	Q4KLF8;A0A0G2K585;A0A0U1RRQ2	Q4KLF8;A0A0G2K585			0.0123524	0.00861886	0.0198532
Hmgb2;LOC100911856;RGD1561694	High mobility group protein B2	7	1.12746	1.08919	1.13664	-1.04171	-1.38449	-1.07975	0.264196	0.00203973	-0.113577	8	6	6	30	22.4	22.4	24.159	0	37.514	1669900000	38	2.60453	2.76042	2.39156	P52925;D3ZN59;D3ZS25	P52925;D3ZN59;D3ZS25			0.00248582	0.00173612	0.0040592
Smc2	Structural maintenance of chromosomes protein	7	1.29464	0.946993	1.14084	-1.18596	-1.34715	-0.864747	0.322123	-0.100138	-0.206608	21	21	21	20.1	20.1	20.1	134.28	0	32.883	372160000	55	2.0618	2.24548	1.88069	D4A5Q2	D4A5Q2			0.00867361	0.00568225	0.0131616
Gtf2e1		7	1.22415	1.09522	0.867005	-1.08955	-1.37303	-1.13838	0.189462	-0.133177	0.358299	10	10	10	28.3	28.3	28.3	49.228	0	40.367	441450000	45	2.29507	2.39471	2.02839	G3V992;Q4FZQ9	G3V992;Q4FZQ9			0.00506909	0.00402986	0.0093672
Psip1	PC4 and SFRS1-interacting protein	7	1.07697	1.02302	1.18666	-1.19619	-1.68651	-0.313488	-0.0848777	0.04584	-0.0514246	11	10	10	28.8	27.3	27.3	59.615	0	76.696	676980000	56	1.36027	1.56481	1.21413	F1SW39;Q812D1;Q566D6;Q812D1-2	F1SW39;Q812D1;Q566D6;Q812D1-2			0.0436245	0.0272389	0.0610759
Erc1	ELKS/Rab6-interacting/CAST family member 1	7	1.33052	0.865515	1.33166	-1.06628	-1.41384	-0.554377	-0.455288	-0.186381	0.148475	35	35	29	36.2	36.2	31.8	128.32	0	204.36	1779600000	168	1.58575	1.85008	1.49161	A0A0G2JYT1;F1LPE9;Q811U3	A0A0G2JYT1;F1LPE9;Q811U3			0.0259567	0.0141228	0.0322396
Pfdn6		7	1.11898	0.793016	1.21797	-1.6698	-1.25289	-0.484776	0.0830965	0.00556258	0.188835	8	8	8	55.9	55.9	55.9	14.497	0	62.383	2582300000	108	1.46938	1.60475	1.25275	Q6MGC4;A0A0U1RRW5	Q6MGC4			0.0339328	0.0248456	0.0558792
Gli3		7	1.05948	0.968884	1.32407	-1.666	-1.0269	-0.471683	-0.302013	0.189971	-0.0758145	5	5	5	3.2	3.2	3.2	171.5	0	9.7075	73089000	10	1.42054	1.64071	1.2876	F1M9H1;A0A0G2JZ17;Q91WY5;F1M2B7	F1M9H1;A0A0G2JZ17			0.0379717	0.0228713	0.0515703
Ube2q2l		7	1.17414	0.920651	0.87814	-1.85391	-1.14949	-0.390324	0.0456799	0.0886254	0.286481	6	6	6	19.4	19.4	19.4	42.189	0	11.122	227090000	28	1.26033	1.36781	1.02506	D4ADP2	D4ADP2			0.0549123	0.0428736	0.094393
Cth	Cystathionine gamma-lyase	7	1.12573	0.948916	1.20796	-1.4464	-1.37674	-0.54464	-0.186557	0.042887	0.228841	20	20	20	68.1	68.1	68.1	43.58	0	127.29	4618800000	193	1.66071	1.83278	1.47469	Q9EQS4;A0A0G2K3C5;P18757;A0A0G2K5G2	Q9EQS4;A0A0G2K3C5;P18757;A0A0G2K5G2			0.0218419	0.0146967	0.0335205
Plekho2		7	1.16642	0.691963	1.34862	-1.64554	-1.16982	-0.210844	-0.434009	0.107735	0.145479	13	13	13	30.6	30.6	30.6	54.007	0	69.081	761990000	80	1.08696	1.30631	0.966614	D3Z9K4	D3Z9K4			0.081854	0.0493958	0.107991
Eif3i	Eukaryotic translation initiation factor 3 subunit I	7	1.22267	1.08831	0.880153	-1.16233	-1.62893	-0.472687	0.276218	-0.434215	0.230809	19	19	19	75.1	75.1	75.1	36.46	0	273.8	6008000000	231	1.32121	1.49754	1.14928	B0BNA7;M0RCH0	B0BNA7;M0RCH0			0.0477298	0.0318024	0.070912
Tgfb1i1	Transforming growth factor beta-1-induced transcript 1 protein	7	0.996927	1.08487	1.12928	-1.40383	-1.46295	-0.562694	0.213024	-0.198472	0.203854	24	24	24	79.2	79.2	79.2	50.122	0	323.31	13676000000	495	1.65909	1.80505	1.44759	Q99PD6	Q99PD6			0.0219235	0.0156657	0.0356788
Creb1;Crem;Atf1	Cyclic AMP-responsive element-binding protein 1	7	1.19451	0.89575	0.788196	-1.67677	-1.4142	-0.349563	0.38457	-0.07275	0.25025	3	3	3	9.2	9.2	9.2	35.081	0	8.8126	276990000	27	1.2429	1.31868	0.978343	P15337-2;P15337;A0A0G2K748;D3ZXY8;Q62613;F7FD47;Q5BK34;Q3KR79;A0A0G2JYV9;Q9R1Q5;Q03061-1	P15337-2;P15337;A0A0G2K748;D3ZXY8;Q62613;F7FD47;Q5BK34;Q3KR79;A0A0G2JYV9			0.057161	0.0480087	0.105113
Tinagl1	Tubulointerstitial nephritis antigen-like	7	1.10287	1.32165	0.8778	-1.13061	-1.59131	-0.25241	0.0842567	0.181214	-0.593462	10	10	10	28.5	28.5	28.5	52.764	0	40.509	538870000	62	1.14474	1.38558	1.04201	Q4V8N0;Q9EQT5	Q4V8N0;Q9EQT5			0.0716572	0.0411548	0.09078
		7	0.735767	0.896971	1.53958	-1.31888	-1.05503	-0.877437	0.482297	-0.618427	0.215168	9	9	9	10.6	10.6	10.6	113.33	0	13.565	207580000	35	1.28102	1.45649	1.10985	A0A0G2K0J7	A0A0G2K0J7			0.0523576	0.0349551	0.0776515
Smarcd2	SWI/SNF-related matrix-associated actin-dependent regulator of chromatin subfamily D member 2	7	0.695866	1.01348	1.53688	-1.38913	-0.977532	-0.816161	0.579215	-0.450305	-0.192313	5	3	3	13	7.5	7.5	59.128	0	8.5546	59026000	11	1.28712	1.4874	1.13953	O54772	O54772			0.0516274	0.0325537	0.072522
Luc7l2		7	0.890834	0.662003	1.39232	-1.51168	-0.909301	-1.02453	0.273566	-0.419253	0.646037	15	15	9	38.3	38.3	22.4	46.582	0	106.99	4532100000	169	1.31173	1.40055	1.0563	B2RYP6	B2RYP6			0.0487832	0.0397603	0.0878416
Pfkl	ATP-dependent 6-phosphofructokinase, liver type;ATP-dependent 6-phosphofructokinase	7	0.936165	0.741617	1.75268	-1.01602	-1.05541	-0.925075	-0.269073	-0.537299	0.372411	22	18	17	35.1	30.3	27.8	85.338	0	93.044	1612300000	80	1.34075	1.59665	1.24492	P30835;Q6P783	P30835;Q6P783			0.04563	0.0253134	0.0568958
Frg1		7	1.08619	0.513213	1.45227	-1.29074	-0.87416	-1.32356	0.271361	-0.215953	0.381389	6	6	6	24.8	24.8	24.8	29.041	0	33.295	176910000	18	1.52009	1.62039	1.2679	D3ZZK8	D3ZZK8			0.0301933	0.0239668	0.0539635
Tomm34	Mitochondrial import receptor subunit TOM34	7	0.855458	0.667314	1.73785	-1.1048	-0.483916	-1.47439	-0.109015	-0.325649	0.237144	18	18	18	67.3	67.3	67.3	34.461	0	174.9	2672900000	144	1.17597	1.39787	1.05374	Q3KRD5	Q3KRD5			0.0666853	0.0400064	0.0883609
Nudc	Nuclear migration protein nudC	7	1.24466	0.484895	0.965508	-1.54	-1.20111	-0.966808	0.695652	0.146993	0.170211	25	25	25	64.8	64.8	64.8	38.412	0	323.31	14473000000	360	1.63123	1.57568	1.22463	Q63525;A0A0G2K0V8	Q63525;A0A0G2K0V8			0.023376	0.0265656	0.059617
Rbm22	Pre-mRNA-splicing factor RBM22	7	0.940507	0.481376	1.09629	-1.69027	-1.13421	-0.851575	0.809086	-0.046735	0.395528	8	8	8	21	21	21	46.863	0	21.517	338840000	31	1.39848	1.30343	0.963892	Q4V7D7	Q4V7D7			0.0399503	0.0497245	0.10867
Adk	Adenosine kinase	7	0.986119	0.636183	1.23293	-1.42936	-1.31125	-0.930798	0.675885	0.0100895	0.130207	15	15	15	59.6	59.6	59.6	40.132	0	101.81	1563500000	101	1.72379	1.72492	1.36944	A0A0G2JSL8;Q64640;A0A0G2K6X9	A0A0G2JSL8;Q64640;A0A0G2K6X9			0.018889	0.01884	0.042713
Cystm1		7	0.977883	0.680876	1.27588	-1.45975	-1.32308	-0.71527	0.552119	-0.350967	0.362311	2	2	2	10.9	10.9	10.9	11.116	0	37.468	397730000	15	1.39177	1.46441	1.11746	D3ZR95	D3ZR95			0.0405723	0.0343234	0.0763027
Arfgap3	ADP-ribosylation factor GTPase-activating protein 3	7	1.19417	0.70928	1.0629	-1.36221	-0.944368	-1.14207	0.896042	-0.186305	-0.227448	18	18	18	45.5	45.5	45.5	57.67	0	259.31	2618200000	178	1.33856	1.43106	1.08548	Q4KLN7;A0A0G2K4J0;M0R738	Q4KLN7;A0A0G2K4J0;M0R738			0.0458606	0.037063	0.0821334
Trmt10a	tRNA methyltransferase 10 homolog A	7	1.05765	0.79976	0.460807	-1.7341	-0.613768	-1.39022	0.632218	0.355259	0.432394	3	3	3	10.6	10.6	10.6	39.001	0	12.419	123060000	17	1.43878	1.24894	0.912397	A0A0G2K1N0;Q4KLI2	A0A0G2K1N0;Q4KLI2			0.0364099	0.0563716	0.12235
Recql	ATP-dependent DNA helicase Q1	7	1.36511	0.889474	0.904664	-1.28428	-0.432201	-1.43753	-0.645608	0.354752	0.285624	11	11	11	23	23	23	69.641	0	20.554	314190000	32	1.15571	1.34672	1.00498	Q6AYJ1;A0A0G2K5S2	Q6AYJ1;A0A0G2K5S2			0.0698699	0.045007	0.0988599
Hpcal1	Hippocalcin-like protein 1	7	1.11496	0.462475	1.17619	-1.67568	-0.894767	-1.10581	0.192703	0.476085	0.253835	13	13	6	74.6	74.6	38.9	22.338	0	137.56	2288600000	125	1.60223	1.57481	1.22379	P62749	P62749			0.0249902	0.0266189	0.0597324
Mef2d;Mef2c	Myocyte-specific enhancer factor 2D	7	1.28833	0.612373	0.924925	-1.56063	-0.66997	-1.34883	-0.119078	0.510012	0.362871	2	2	1	4.3	4.3	2.2	54.241	0	24.243	183350000	17	1.43907	1.46268	1.11579	A0A0G2JSU7;O89038;A0A096MJZ6;A0A096MK01;A0A096MJ09;A0A096MKI4;A0A096MJ23;A0A096MK43;A0A096MK88;A0A096MJD9;A0A096MJY4	A0A0G2JSU7;O89038;A0A096MJZ6;A0A096MK01;A0A096MJ09;A0A096MKI4;A0A096MJ23;A0A096MK43;A0A096MK88;A0A096MJD9;A0A096MJY4			0.0363856	0.0344604	0.0765967
Pak1	Serine/threonine-protein kinase PAK 1	7	0.694362	0.361922	0.892299	-1.53602	-0.851839	-1.39994	0.105135	0.992112	0.741968	23	18	14	50.9	38.4	30.5	60.577	0	295.66	3416100000	246	1.48051	1.10557	0.778394	P35465	P35465			0.0330742	0.0784206	0.166574
Ranbp2		7	0.907456	0.847155	1.14767	-1.78367	-0.629173	-1.15354	0.449755	0.0421473	0.1722	98	98	98	36.8	36.8	36.8	344.39	0	323.31	6075000000	496	1.4955	1.54142	1.19155	M0R3M4;D4A054	M0R3M4;D4A054			0.0319521	0.0287462	0.0643354
Polr2b	DNA-directed RNA polymerase	7	0.876393	0.38348	1.20783	-1.81185	-0.850335	-1.0312	0.384169	0.254744	0.586767	28	28	28	27	27	27	133.9	0	113.09	1293100000	113	1.40729	1.28916	0.950373	G3V8Y5	G3V8Y5			0.039148	0.0513854	0.112106
Yars	Tyrosine--tRNA ligase, cytoplasmic;Tyrosine--tRNA ligase, cytoplasmic, N-terminally processed	7	1.17781	0.748335	0.908434	-1.68383	-0.965442	-1.06147	0.460409	0.0754949	0.340255	42	42	42	72.3	72.3	72.3	63.025	0	173.14	14295000000	514	1.83824	1.82028	1.46247	A0A0H2UHG0;Q4KM49	A0A0H2UHG0;Q4KM49			0.0145131	0.0151259	0.034477
Mad2l1		7	1.28839	0.768376	0.908929	-1.48699	-0.687167	-1.30529	0.0314907	-0.216622	0.698884	9	9	8	43.4	43.4	40	23.539	0	19.525	824490000	50	1.39169	1.47608	1.12866	D4ACM2	D4ACM2			0.0405798	0.0334133	0.0743601
Ugdh	UDP-glucose 6-dehydrogenase	7	1.49966	0.607709	0.798458	-1.81684	-0.866249	-0.738216	-0.0120169	0.197977	0.329522	21	21	21	64.3	64.3	64.3	54.886	0	168.8	3478200000	136	1.23856	1.32522	0.984556	G3V6C4;O70199	G3V6C4;O70199			0.0577351	0.0472912	0.10362
Tjp2;ZO-2		7	1.38534	0.517133	0.945538	-1.83689	-0.861054	-0.769537	0.341895	-0.0287915	0.306369	38	38	38	38.7	38.7	38.7	131.36	0	222.6	4131600000	293	1.25764	1.3194	0.97903	Q3ZB99;P70625;A0A0G2K8M3;D3Z8G7	Q3ZB99;P70625			0.0552535	0.0479292	0.104947
Gpatch8		7	1.73986	1.11814	0.318497	-1.23144	-0.787424	-1.09146	0.282744	0.101793	-0.45071	6	6	6	5.1	5.1	5.1	166.14	0	10.173	71789000	10	1.1306	1.33186	0.990858	F1M4M5	F1M4M5			0.0740287	0.0465736	0.102127
Rasal2		7	1.83568	0.755099	0.624165	-0.650796	-1.31681	-1.19807	-0.10871	0.208664	-0.149234	21	21	17	20.1	20.1	16.9	143.67	0	47.791	773240000	78	1.22863	1.42676	1.08136	A0A0G2JTA7;D4AAY3;D3ZCL8;F1LQW8;Q9QUH6-5;Q9QUH6-4;Q9QUH6-3;Q9QUH6-2;Q9QUH6	A0A0G2JTA7;D4AAY3			0.0590704	0.0374317	0.0829163
Hook3		7	1.2374	0.995341	0.461159	-1.04648	-1.33034	-1.37887	0.0897586	0.582985	0.389039	14	14	13	17.8	17.8	17.8	80.493	0	67.306	1533600000	86	1.80169	1.72683	1.3713	Q7TQ77	Q7TQ77			0.0157874	0.0187573	0.0425305
Synm		7	1.19682	1.12168	1.23321	-1.61581	-0.480168	0.193424	-0.578181	-0.567691	-0.50327	8	8	8	9	9	9	140.73	0	12.644	115720000	14	1.01589	1.35727	1.01502	Q810D0;A0A096MK54;G3V9G5;A0A096MKE8	Q810D0;A0A096MK54;G3V9G5			0.0964073	0.0439268	0.0966006
Iqgap3		7	0.90881	1.2636	1.34679	-1.63337	-0.471239	-0.133334	-0.353827	-0.0760704	-0.851355	8	6	6	6.7	5.4	5.4	185.3	0	9.7857	44276000	7	1.02641	1.35606	1.01387	D3ZCS4	D3ZCS4			0.0941001	0.0440494	0.0968568
Adam12		7	1.34099	0.957605	1.33605	-1.28901	0.114708	-0.590364	-0.387004	-0.404502	-1.07847	6	6	6	7	7	7	96.517	0	9.2056	120910000	11	1.13878	1.48646	1.13863	F1M9Z9	F1M9Z9			0.0726474	0.0326242	0.0726725
		7	1.02649	1.10067	1.50887	-1.42639	-0.0935919	-0.829702	-0.535297	-0.0946213	-0.656431	23	23	23	24.7	24.7	24.7	119.46	0	127.84	2104200000	143	1.23522	1.57056	1.21969	A0A0G2K1E2;Q7M074	A0A0G2K1E2			0.0581808	0.0268807	0.060299
Gmps	GMP synthase [glutamine-hydrolyzing]	7	0.957911	1.35813	1.21428	-0.765396	-1.51917	-0.800262	-0.392495	0.165623	-0.218618	34	34	34	60.5	60.5	60.5	76.757	0	280.79	3768600000	234	1.67942	1.9375	1.57728	Q4V7C6;A0A0G2K2C2;A0A096MJ75;A0A096MJK6	Q4V7C6;A0A0G2K2C2;A0A096MJ75			0.0209209	0.0115478	0.0264679
Papss2		7	0.867636	1.50187	1.15231	-0.660102	-1.28012	-1.06414	-0.645584	0.19047	-0.0623529	13	12	12	29.3	27	27	69.411	0	27.795	178020000	28	1.52692	1.79427	1.43706	B5DFH4;A0A0G2K950	B5DFH4;A0A0G2K950			0.0297221	0.0160594	0.0365544
H2afy	Core histone macro-H2A.1	7	0.71427	1.34939	1.38384	-0.199081	-1.26419	-0.99357	-1.04231	0.169325	-0.117681	13	13	12	44.2	44.2	41.8	39.503	0	52.78	1444700000	85	1.00932	1.31987	0.979473	Q02874;Q02874-2	Q02874;Q02874-2			0.0978769	0.0478773	0.10484
Supt5h	Transcription elongation factor SPT5	7	0.782828	1.38106	1.06783	-0.719046	-1.31491	-1.2079	-0.0416574	0.587806	-0.536014	29	29	29	35.7	35.7	35.7	121.04	0	220.02	1779700000	182	1.34466	1.53207	1.18253	E9PTB2;Q63403	E9PTB2			0.045221	0.0293718	0.0656856
Wdr70	WD repeat-containing protein 70	7	0.947417	1.29637	1.01309	-0.743484	-1.0583	-1.21591	-0.595455	0.820879	-0.464607	7	7	7	13	13	13	72.835	0	14.269	260820000	22	1.13095	1.35905	1.01672	Q5EB92	Q5EB92			0.073969	0.0437472	0.0962232
Slc3a2	4F2 cell-surface antigen heavy chain	7	0.999355	1.07786	1.27164	-1.36645	-0.558151	-0.890712	-0.858833	0.642164	-0.316866	22	22	2	54.6	54.6	3.8	58.071	0	323.31	14342000000	446	1.07979	1.34673	1.00499	Q794F9	Q794F9			0.0832166	0.045006	0.0988576
Slc38a10		7	1.12787	1.12888	1.32634	-1.29065	-0.791984	-0.538354	-0.689104	0.410946	-0.683945	5	5	5	5.6	5.6	5.6	118.8	0	17.526	108590000	18	1.2796	1.59275	1.24114	E9PT23;Q4G035	E9PT23			0.0525291	0.0255417	0.0573931
Sun2		7	0.975121	1.45959	1.25742	-0.94404	-0.94704	-0.679314	-0.553021	0.272653	-0.841367	15	15	15	30.4	30.4	30.4	81.526	0	82.039	656200000	65	1.47263	1.80088	1.44351	D3ZTT7	D3ZTT7			0.0336798	0.0158169	0.0360155
Axl	Receptor protein-tyrosine kinase	7	1.23144	1.0005	1.27303	-1.41201	-0.62584	-0.369096	-0.423735	0.346006	-1.0203	10	10	9	13.8	13.8	12.7	96.831	0	29.795	449800000	34	1.05994	1.37956	1.03626	A0A0G2K2H0;E9PSX9;E9PSY0;Q8VI99;Q8VIA0;O55059	A0A0G2K2H0;E9PSX9;E9PSY0;Q8VI99;Q8VIA0			0.0871084	0.0417292	0.0919899
Mthfd1l		7	1.09947	1.25054	1.1678	-1.18276	-0.681851	-0.637243	-0.406339	0.483439	-1.09307	36	35	35	47	46.3	46.3	105.84	0	148.28	2651400000	231	1.11506	1.42992	1.08438	B2GUZ3	B2GUZ3			0.0767255	0.0371604	0.0823417
Sp1	Transcription factor Sp1	7	0.690076	1.40437	1.52318	-1.0886	-0.926704	-0.443629	-0.750716	0.210772	-0.61874	5	5	5	8	8	8	80.771	0	25.714	187960000	26	1.24978	1.57753	1.22642	Q01714	Q01714			0.0562626	0.0264527	0.0593718
Slc1a5	Amino acid transporter	7	1.09127	0.966628	1.5674	-0.733665	-1.02152	-0.820477	-0.965779	0.294833	-0.378697	6	6	6	12.4	12.4	12.4	56.755	0	35.139	313540000	44	1.32879	1.64978	1.29639	Q9Z1J7;A0A0F7R4W9;D3ZJ25	Q9Z1J7;A0A0F7R4W9;D3ZJ25			0.046904	0.0223986	0.0505371
Ptk7		7	1.09136	1.24494	1.49135	-1.03479	-0.873175	-0.44328	-0.877047	-0.131742	-0.46761	30	30	30	48.5	48.5	48.5	86.263	0	205.01	8024600000	330	1.74764	2.10007	1.73717	D3ZHG3	D3ZHG3			0.0178797	0.007942	0.018316
Polr2a	DNA-directed RNA polymerase	7	1.03985	0.630407	1.50113	-1.17707	-1.43081	-0.692778	-0.27968	0.515438	-0.106486	25	25	25	15.5	15.5	15.5	217.2	0	58.795	709090000	74	1.34789	1.51359	1.16473	D4A5A6	D4A5A6			0.0448859	0.0306486	0.0684337
Clic1	Chloride intracellular channel protein 1	7	1.20752	0.469033	1.80014	-1.17004	-1.05639	-0.484486	-0.526646	0.0474239	-0.286565	16	16	16	83.8	83.8	83.8	26.98	0	323.31	16256000000	364	1.17096	1.46444	1.11748	Q6MG61;A8USN8;A0A0G2K6C0	Q6MG61			0.067459	0.034321	0.0762992
Lrrfip1	Leucine-rich repeat flightless-interacting protein 1	7	1.17421	1.15355	1.4881	-1.10006	-0.513467	-1.00416	-0.254316	-0.676711	-0.267147	31	31	30	61.7	61.7	60	80.018	0	323.31	7356900000	408	1.97855	2.31617	1.95061	Q66HF9	Q66HF9			0.0105063	0.0048287	0.0112044
Uba6		7	1.22397	0.414256	1.84795	-1.08024	-0.917843	-0.785409	-0.0207982	-0.508623	-0.173264	45	45	45	56.6	56.6	56.6	117.93	0	255.49	2938300000	272	1.23496	1.52257	1.17338	D4A8H3	D4A8H3			0.0582157	0.0300213	0.0670842
Tnks1bp1		7	1.31438	0.917347	1.50199	-1.08545	-0.677224	-1.03265	-0.0257719	-0.291058	-0.621566	55	55	55	42.3	42.3	42.3	180.01	0	323.31	5716700000	496	1.86763	2.18309	1.81906	D3ZF26	D3ZF26			0.0135634	0.00656009	0.0151684
Taok2	Serine/threonine-protein kinase TAO2	7	0.941779	0.961774	1.73974	-1.33524	-0.591727	-0.826176	-0.0728258	-0.351839	-0.465486	8	5	5	7.1	5.4	5.4	119.83	0	9.8467	267230000	15	1.51254	1.82148	1.46365	A0A0G2JXV6;F1LSD5;Q9JLS3-2;A0A0G2K1M0;Q9JLS3	A0A0G2JXV6;F1LSD5;Q9JLS3-2;A0A0G2K1M0;Q9JLS3			0.0307227	0.0150841	0.0343835
Ank3	Ankyrin-3	7	0.913881	1.12016	1.45845	-1.55406	-0.598748	-0.607203	0.284936	-0.653487	-0.363937	22	17	1	11.1	8.9	0.5	277.46	0	46.749	355920000	36	1.22718	1.51787	1.16886	A0A0G2K1R9;A0A0G2K0J3;O70511;A0A0G2K4D0;A0A0G2K2B9;A0A0G2K1Q7;O70511-3;O70511-2	A0A0G2K1R9;A0A0G2K0J3;O70511;A0A0G2K4D0;A0A0G2K2B9;A0A0G2K1Q7;O70511-3;O70511-2			0.059268	0.030348	0.067786
Insr	Tyrosine-protein kinase receptor;Insulin receptor;Insulin receptor subunit alpha;Insulin receptor subunit beta	7	0.859024	0.979618	1.6721	-1.42931	-0.668221	-0.833496	-0.384269	0.181181	-0.376633	4	3	3	3.5	2.7	2.7	156.73	0	8.5791	45103000	13	1.41187	1.68659	1.33215	F1LPL6;T2CB11;P15127-2;P15127;Q9R1G9;Q6Q2A2	F1LPL6;T2CB11;P15127-2;P15127			0.0387374	0.0205783	0.0465425
Nav1		7	0.984117	0.904481	1.55637	-1.51477	-0.612682	-1.03279	-0.230406	-0.0309031	-0.0234182	14	14	14	10.1	10.1	10.1	195.97	0	33.776	497420000	44	1.59824	1.83318	1.47508	F1M031;F1LYK3;D4A5I4;A0A0G2JZB7;A0A0G2K833;F1LR12	F1M031;F1LYK3;D4A5I4			0.0252209	0.0146832	0.0334904
Rpl22l2;LOC688712		7	0.708163	0.912926	1.78585	-1.29336	-1.06029	-0.775183	-0.265545	0.0542171	-0.0667904	3	3	3	35.2	35.2	35.2	14.441	0	108.28	1186800000	37	1.46671	1.70071	1.34587	D3ZSF9;B2RZD5;A0A0G2JZA6	D3ZSF9;B2RZD5			0.0341421	0.01992	0.0450952
Adgrl2;Lphn2	Latrophilin-2	7	1.40169	0.738681	1.37892	-1.19813	-0.823527	-1.18571	-0.163575	0.0498954	-0.198249	22	22	22	19.9	19.9	19.9	158.34	0	77.686	692920000	86	1.93545	2.17432	1.8104	D3ZNG0;D3ZU32;A0A0G2KB62;D3ZBE9;F1M7T0;O88923-3;O88923-6;O88923-2;O88923-4;O88923-5;O88923-1;O88923	D3ZNG0;D3ZU32;A0A0G2KB62;D3ZBE9;F1M7T0;O88923-3;O88923-6;O88923-2;O88923-4;O88923-5;O88923-1;O88923			0.0116025	0.00669391	0.0154739
Pbx3		7	1.09646	0.738316	1.67143	-1.41635	-0.688069	-0.927145	-0.270284	0.0117039	-0.216063	4	4	2	12.4	12.4	6.8	36.128	0	4.395	126920000	15	1.53034	1.79211	1.43496	A0A0G2K9K8;D4AB31;Q6MG87	A0A0G2K9K8;D4AB31			0.029489	0.0161395	0.0367316
Setd2	Histone-lysine N-methyltransferase	7	1.06641	0.821647	1.61214	-1.40457	-0.884914	-0.835513	-0.243299	0.116814	-0.248725	10	10	10	5.2	5.2	5.2	259.31	0	10.332	1427700000	19	1.6723	1.92053	1.56063	D4A5H6;A0A0G2KB10	D4A5H6;A0A0G2KB10			0.0212667	0.012008	0.0275024
Rbm3	RNA-binding protein 3	7	0.655385	1.39295	1.35071	-1.59525	-0.956278	-0.112338	0.0675535	-0.34185	-0.460883	9	9	2	58.1	58.1	8.4	16.855	0	206.56	10572000000	248	1.04712	1.33577	0.994574	Q925G0;Q925G0-2	Q925G0;Q925G0-2			0.0897181	0.0461562	0.101257
Pdlim5	PDZ and LIM domain protein 5	7	0.935364	1.35277	1.39648	-1.26533	-1.07145	-0.54826	-0.0352722	-0.413584	-0.350723	33	33	33	65.3	65.3	65.3	63.201	0	323.31	64585000000	1135	1.82341	2.12479	1.76154	Q62920	Q62920			0.0150172	0.00750257	0.0173165
Ltbp4		7	1.44646	1.23473	1.07521	-1.25622	-0.934708	-0.522963	-0.0460273	-0.457927	-0.53856	14	13	13	11.7	11.2	11.2	154.01	0	80.37	193040000	32	1.83394	2.1586	1.79488	A0A0G2K588;D4A917	A0A0G2K588;D4A917			0.0146575	0.00694065	0.0160369
Dusp27		7	1.13537	1.45502	1.24682	-1.23301	-0.823089	-0.564785	-0.268293	-0.450457	-0.497584	18	18	18	19.5	19.5	19.5	128.73	0	226.8	1054300000	94	2.11955	2.45908	2.09221	D3ZRM0	D3ZRM0			0.00759364	0.00347472	0.00808705
Fst	Follistatin	7	1.4164	1.05979	1.30153	-1.0129	-1.05275	-0.722885	-0.420416	0.0167558	-0.585527	11	11	11	34.3	34.3	34.3	37.838	0	21.673	224460000	43	2.08719	2.40814	2.0417	P21674;Q7TS59	P21674			0.00818107	0.00390715	0.00908448
Col5a1	Collagen alpha-1(V) chain	7	1.29886	1.16214	1.37962	-0.910406	-1.01383	-0.805336	-0.210543	-0.222194	-0.678307	41	37	7	33.1	31.5	4.8	184	0	323.31	7216600000	474	2.44259	2.77497	2.40603	G3V763;Q9JI03;O70603	G3V763;Q9JI03			0.00360919	0.00167892	0.00392618
Eln	Elastin	7	0.996643	1.47169	1.28312	-0.87121	-1.3144	-0.161767	-0.369711	-0.446636	-0.587736	12	12	12	29.4	29.4	29.4	68.02	0	103.28	2960900000	102	1.48791	1.83384	1.47572	A0A0G2JST5;D4A9U4;Q99372-3;Q99372-6;Q99372;Q99372-4;Q99372-5;Q99372-2;Q99372-8;Q99372-7	A0A0G2JST5;D4A9U4;Q99372-3;Q99372-6;Q99372;Q99372-4;Q99372-5;Q99372-2;Q99372-8;Q99372-7			0.0325155	0.0146609	0.0334411
Col1a2	Collagen alpha-2(I) chain	7	1.2396	1.19401	1.29903	-0.960125	-1.28902	-0.586942	-0.0811733	-0.203596	-0.611788	85	85	84	84.9	84.9	84.2	129.63	0	323.31	83523000000	2359	1.9407	2.2524	1.88753	F1LS40;A0A0G2KAN1;A0A0G2K5E8;P02466;Q63076;Q63077	F1LS40;A0A0G2KAN1;A0A0G2K5E8;P02466			0.011463	0.00559242	0.012956
Prkcdbp	Protein kinase C delta-binding protein	7	1.10027	1.30976	1.4327	-1.17971	-0.808385	-0.694514	-0.442561	-0.500987	-0.216575	11	11	11	52.5	52.5	52.5	27.91	0	172.54	3127300000	147	2.31096	2.64694	2.27872	Q9Z1H9	Q9Z1H9			0.00488697	0.00225455	0.00526357
Twf1	Twinfilin-1	7	1.25196	1.33372	1.18778	-1.23946	-0.682427	-0.985738	-0.261149	-0.206648	-0.398038	22	22	18	63.7	63.7	57.7	40.09	0	268.52	7771100000	306	2.45142	2.7611	2.39223	Q5RJR2	Q5RJR2			0.00353655	0.0017334	0.00405294
Ehd2	EH domain-containing protein 2	7	1.28131	1.30694	1.33617	-0.723554	-1.04117	-0.78808	-0.532437	-0.436531	-0.402642	34	34	31	75.7	75.7	70.7	61.237	0	323.31	6462300000	300	3.11612	3.46798	3.0969	Q4V8H8;O88638	Q4V8H8			0.000765385	0.000340424	0.000800018
Rhoa	Transforming protein RhoA	7	0.67912	1.39068	1.63397	-0.965427	-0.810959	-0.948259	-0.606958	-0.121296	-0.250871	14	14	7	72.5	72.5	38.3	21.782	0	142.2	10052000000	302	1.65229	1.97039	1.60956	P61589;O35791;Q5XIM3;Q80WN4	P61589;O35791			0.0222695	0.0107056	0.024572
Prkar2b	cAMP-dependent protein kinase type II-beta regulatory subunit	7	1.1546	1.42162	1.19741	-0.822269	-1.1729	-0.862581	-0.605287	-0.126821	-0.183768	10	8	8	32.5	26	26	46.122	0	27.707	202900000	37	2.25415	2.56856	2.20085	R9PXT9;P12369;Q4KLG5;A0A0G2K5G0	R9PXT9;P12369;Q4KLG5;A0A0G2K5G0			0.00556993	0.00270047	0.00629724
Gpx1	Glutathione peroxidase 1;Glutathione peroxidase	7	1.27336	1.36134	1.25719	-0.791086	-0.901412	-0.915848	-0.45872	-0.170452	-0.654363	10	10	10	59	59	59	22.155	0	31.383	465170000	47	2.66343	3.00909	2.63916	M0RAM5;P04041;Q6PDW8	M0RAM5;P04041;Q6PDW8			0.00217055	0.000979287	0.0022953
Smtn		7	1.11869	1.31878	1.37725	-1.05431	-1.03017	-0.810261	-0.322087	-0.31762	-0.280271	34	34	32	47.3	47.3	45.5	99.878	0	323.31	3521800000	282	3.05086	3.36656	2.99566	D4ABA5	D4ABA5			0.000889488	0.000429972	0.00101004
Trps1		7	1.31526	1.13585	1.37449	-0.968165	-1.06891	-0.750946	-0.111114	-0.514881	-0.411594	7	7	7	8	8	8	141.01	0	20.884	96784000	13	2.50253	2.82875	2.45956	D3ZEM6	D3ZEM6			0.00314391	0.00148337	0.00347088
Pnp	Purine nucleoside phosphorylase	7	1.35635	1.04423	1.41979	-0.852585	-1.1212	-0.819127	-0.255393	-0.519945	-0.252115	15	15	15	69.6	69.6	69.6	32.302	0	169.95	4394000000	216	2.46125	2.78651	2.41751	D3ZXK9;P85973	D3ZXK9;P85973			0.0034574	0.0016349	0.00382375
Adam19		7	1.29698	0.95093	1.35196	-0.907276	-1.28301	-0.886814	-0.00373237	0.0530118	-0.572052	8	8	8	10.7	10.7	10.7	101.12	0	10.685	106780000	17	1.89986	2.16853	1.80469	D3ZPM7	D3ZPM7			0.0125933	0.00678375	0.0156787
Sae1	SUMO-activating enzyme subunit 1;SUMO-activating enzyme subunit 1, N-terminally processed	7	1.30927	0.886473	1.47312	-0.605796	-1.42872	-0.694959	-0.22981	-0.0958102	-0.613765	23	23	23	83.7	83.7	83.7	38.512	0	323.31	9172200000	363	1.55462	1.86847	1.50961	Q6AXQ0	Q6AXQ0			0.0278856	0.0135372	0.0309307
Palm2		7	1.08671	0.820477	1.59676	-0.652064	-1.3711	-0.974398	-0.0289841	0.0981096	-0.575512	17	17	10	45.5	45.5	30.1	42.055	0	105.17	2497600000	128	1.4785	1.74429	1.38831	A0A096MIZ1;D4A4D8;A0A096MJ96	A0A096MIZ1			0.0332277	0.0180181	0.0408969
S100a4	Protein S100-A4	7	1.05514	0.777072	1.76488	-0.808001	-1.35746	-0.664642	-0.112322	-0.283518	-0.371137	5	5	5	42.6	42.6	42.6	11.776	0	100.43	13224000000	116	1.48306	1.77942	1.42257	P05942	P05942			0.0328806	0.016618	0.0377946
Ppp1r13l		7	0.775436	1.14437	1.51274	-0.829705	-0.270283	-1.688	-0.268684	-0.341387	-0.0344835	17	17	17	27.8	27.8	27.8	89	0	37.457	430090000	55	1.16247	1.44301	1.09693	F1LW07	F1LW07			0.0687907	0.036057	0.0799963
Tmem55b	Type 1 phosphatidylinositol 4,5-bisphosphate 4-phosphatase	7	0.886415	1.02434	1.28226	-0.76646	-0.413509	-1.91436	0.10848	0.0757994	-0.282965	4	3	3	13.7	10.2	10.2	29.993	0	5.628	150100000	14	1.13234	1.33886	0.997513	Q5PPM8	Q5PPM8			0.0737327	0.045829	0.100574
Fbln2		7	1.26264	1.17728	1.26158	-0.880956	-0.161609	-1.20777	0.0626895	-0.850403	-0.663447	15	15	15	15.4	15.4	15.4	131.3	0	71.445	340010000	28	1.32719	1.67251	1.31847	G3V6X1;Q8CJG6;Q8CJG7	G3V6X1			0.0470771	0.0212564	0.0480319
Ncapg		7	1.01224	1.3753	1.20733	-0.491084	-0.482187	-1.68755	-0.362177	-0.356845	-0.215037	16	16	16	22	22	22	112.55	0	19.01	321140000	30	1.32817	1.63946	1.28639	D3ZD72	D3ZD72			0.046971	0.0229372	0.0517142
Mrpl22	39S ribosomal protein L22, mitochondrial	7	0.942138	1.78587	0.834494	-0.459673	-0.197816	-1.4621	-0.217958	-0.4698	-0.755155	4	4	4	17.5	17.5	17.5	25.865	0	11.347	133020000	13	1.05749	1.39526	1.05125	A0A0H2UHT3;P0C2C0	A0A0H2UHT3;P0C2C0			0.0876012	0.0402476	0.0888689
Sh3pxd2b		7	1.20739	1.15178	1.25453	-0.634677	-0.42907	-1.64233	-0.0983634	-0.505797	-0.303466	18	18	16	32.6	32.6	25.9	88.929	0	130.92	527330000	59	1.40086	1.71051	1.35541	D3ZAF9	D3ZAF9			0.039732	0.0194756	0.0441154
Trip13	Pachytene checkpoint protein 2 homolog	7	1.28388	1.28754	1.05352	-0.872718	-0.713101	-1.45354	-0.0293697	-0.127212	-0.428991	6	6	6	16.4	16.4	16.4	48.433	0	26.388	293160000	20	1.90988	2.18664	1.82256	Q5XHZ9	Q5XHZ9			0.0123061	0.00650669	0.0150467
Cav2	Caveolin;Caveolin-2	7	0.97037	1.61946	1.17953	-0.857654	-0.5807	-1.12283	-0.387686	-0.0755883	-0.744903	1	1	1	11.1	11.1	11.1	18.236	0	9.5956	328270000	13	1.69743	2.03399	1.6721	A0A0A0MXU8;Q2IBC5	A0A0A0MXU8;Q2IBC5			0.020071	0.00924719	0.0212765
Unc5b	Netrin receptor UNC5B	7	0.794454	1.46565	1.33313	-0.818189	-0.613439	-1.39258	-0.14519	0.0365151	-0.660345	19	19	18	27.3	27.3	26.5	103.67	0	148.19	813990000	73	1.46792	1.7644	1.40791	F1LNE2;O08722;A0A0G2JTK0;F1LM73;Q761X5	F1LNE2;O08722			0.0340471	0.0172028	0.0390922
Nexn	Nexilin	7	1.62754	0.836976	1.21083	-0.429495	-0.264933	-1.32617	-0.743829	-0.774001	-0.136911	36	36	11	50.3	50.3	14.8	78.392	0	263.05	7082200000	357	1.22316	1.57227	1.22134	Q9Z2J4;A0A0G2K6I3;Q9Z2J4-2;REV__M1S016	Q9Z2J4;A0A0G2K6I3;Q9Z2J4-2			0.0598191	0.026775	0.0600703
Hist1h2bl;Hist1h2bk;LOC100910200;Hist1h2bb;Hist1h2bo;Hist1h2bh;LOC100912338;Hist3h2bb;Hist3h2ba;Hist1h2ba	Histone H2B;Histone H2B type 1;Histone H2B type 1-A	7	0.945199	0.849864	1.69805	-0.908477	-0.800928	-1.05876	-0.505061	-0.672933	0.453048	7	7	7	46.8	46.8	46.8	13.91	0	98.764	101560000000	458	1.23407	1.52404	1.1748	M0R4L7;G3V9C7;G3V8B3;D3ZWM5;A0A0G2JXE0;D3ZNH4;A0A0G2JXI9;Q00715;D3ZLY9;D4A817;A0A0G2K7R1;M0RBQ5;D3ZNZ9;Q00729	M0R4L7;G3V9C7;G3V8B3;D3ZWM5;A0A0G2JXE0;D3ZNH4;A0A0G2JXI9;Q00715;D3ZLY9;D4A817;A0A0G2K7R1;M0RBQ5;D3ZNZ9;Q00729			0.0583351	0.0299199	0.0668652
Anxa6	Annexin;Annexin A6	7	1.15474	0.821077	1.64854	-0.551589	-0.679658	-1.39992	-0.296515	-0.67861	-0.0180627	49	49	48	72.7	72.7	71.6	75.755	0	323.31	62504000000	1351	1.36458	1.68141	1.32711	Q6IMZ3;P48037	Q6IMZ3;P48037			0.0431937	0.0208252	0.0470858
LOC652956		7	1.38709	1.02211	1.26637	-1.51104	-0.733819	-0.606292	-0.351918	-0.273313	-0.199195	13	13	13	36.6	36.6	36.6	50.892	0	84.686	356260000	52	1.73183	2.03547	1.67355	Q6F6B2;Q5BK33	Q6F6B2;Q5BK33			0.0185426	0.00921574	0.0212056
Cav1	Caveolin;Caveolin-1	7	1.13482	1.12382	1.33848	-1.4094	-1.01287	-0.266464	-0.696087	-0.289583	0.0772869	7	7	6	45.5	45.5	39.9	20.551	0	25.621	6349800000	164	1.35327	1.66252	1.30877	Q2IBC6;P41350;Q8R4A2;Q3MHT6;A2VCW2;B1WBN8;P41350-2	Q2IBC6;P41350;Q8R4A2;Q3MHT6;A2VCW2;B1WBN8;P41350-2			0.0443333	0.021751	0.0491168
Sdc1	Syndecan-1	7	1.43742	1.02665	1.21263	-1.19896	-0.952278	-0.74598	-0.654058	-0.253546	0.128117	4	4	4	14.4	14.4	14.4	33.213	0	58.167	434380000	36	1.81478	2.11398	1.75088	P26260	P26260			0.0153186	0.00769166	0.0177468
Cryab	Alpha-crystallin B chain	7	1.21584	1.35808	1.22459	-1.12842	-0.896131	-0.811387	-0.613751	-0.226735	-0.122079	14	14	14	70.3	70.3	70.3	20.089	0	119.87	13392000000	285	2.40064	2.71983	2.35118	P23928	P23928			0.00397521	0.00190621	0.00445472
Igf2r		7	1.70656	1.00568	0.674446	-1.25827	-0.88943	-1.01507	-0.407208	-0.0388468	0.222143	37	37	37	18.8	18.8	18.8	273.4	0	133.05	2441700000	148	1.47941	1.70513	1.35018	Q63002;G3V824	Q63002;G3V824			0.0331581	0.0197183	0.0446498
Spats2l	SPATS2-like protein	7	1.42209	1.12247	1.03448	-1.11827	-0.862596	-1.07336	-0.653921	-0.115621	0.244728	20	20	20	36.9	36.9	36.9	65.541	0	59.603	1122800000	113	1.76955	2.03833	1.67637	A0A0G2JVT4;Q5U2T3	A0A0G2JVT4;Q5U2T3			0.017	0.00915525	0.0210683
Mta2		7	1.25643	1.08559	1.22316	-1.31573	-0.710615	-1.15891	-0.324989	-0.201317	0.14638	15	13	13	24.6	22	22	74.959	0	21.455	356170000	36	2.07076	2.3197	1.95411	B2GV01;Q4FZS6	B2GV01			0.0084965	0.00478961	0.0111145
LOC100362339;Rps19;Rps19l1	40S ribosomal protein S19	7	1.38693	1.31135	1.11279	-0.894983	-0.791208	-0.856166	-0.95307	-0.169655	-0.145996	8	8	4	49	49	31	16.117	0	58.879	13021000000	235	1.84999	2.19173	1.82759	D4A6G6;A0A0H2UI38;P17074;F1M8C7;F1M764;F1LYF3;D3ZGN8;D3ZSH6	D4A6G6;A0A0H2UI38;P17074;F1M8C7;F1M764;F1LYF3;D3ZGN8			0.0141257	0.00643087	0.0148734
Rab23		7	1.60171	1.05439	0.847606	-0.962719	-0.401146	-1.16974	-0.989809	-0.280315	0.300024	9	9	9	45.6	45.6	45.6	26.633	0	81.063	847610000	74	1.11052	1.42165	1.07647	D3ZRM5	D3ZRM5			0.0775318	0.0378748	0.0838552
Msn	Moesin	7	1.22949	1.57917	1.04803	-0.690351	-0.480026	-1.06512	-0.824734	-0.567596	-0.228859	54	54	40	72.3	72.3	55.6	67.826	0	323.31	110750000000	1883	1.80607	2.16472	1.80093	A0A096MK30;O35763	A0A096MK30;O35763			0.015629	0.00684353	0.015815
LOC100359563;Rps20;LOC100909911;RGD1562725;RGD1563124;LOC100364116	40S ribosomal protein S20	7	0.753784	1.58308	1.38244	-0.629401	-0.654267	-1.19104	-0.805063	-0.335994	-0.103537	5	5	5	28.6	28.6	28.6	12.608	0	83.436	15138000000	125	1.47508	1.81183	1.45422	A0A0G2JY70;A0A0H2UHG7;D3ZZK1;A0A0G2K6L6;P60868;M0RB28;M0R5V6;M0R566;A0A0G2K8W1;M0R987;A0A0G2K3E9	A0A0G2JY70;A0A0H2UHG7;D3ZZK1;A0A0G2K6L6;P60868;M0RB28;M0R5V6;M0R566;A0A0G2K8W1;M0R987			0.0334904	0.015423	0.0351382
Flii		7	1.44854	0.90909	1.42499	-0.651297	-0.736428	-0.452332	-0.191014	-1.26509	-0.486459	41	41	41	43.1	43.1	43.1	144.86	0	323.31	3659000000	283	1.46501	1.82273	1.46486	Q5RKI5	Q5RKI5			0.034276	0.0150408	0.0342878
RGD1562037		7	1.45262	0.920537	1.40142	-0.714164	-1.1503	-0.357152	-0.0927789	-0.87684	-0.583337	11	11	11	11.3	11.3	11.3	145.83	0	24.226	134760000	27	1.49857	1.85095	1.49247	F1M6T3	F1M6T3			0.0317271	0.0140945	0.0321758
Slit3	Slit homolog 3 protein	7	1.4431	0.951183	1.23579	-1.02723	-1.35715	-0.228767	-0.0492202	-0.664802	-0.302916	5	4	4	3.4	3	3	167.77	0	7.2982	113950000	14	1.36341	1.6822	1.32788	O88280;F1LQL9	O88280;F1LQL9			0.0433102	0.0207874	0.0470024
Dnajb4		7	1.74865	1.09184	0.990878	-0.780304	-0.926565	-0.742536	-0.197933	-0.660554	-0.52347	18	18	17	62	62	58.5	37.822	0	126.78	3101600000	164	1.8459	2.19442	1.83025	Q5XIP0	Q5XIP0			0.0142594	0.00639116	0.0147826
Fam129b	Niban-like protein 1	7	1.985	0.986455	0.492455	-0.419369	-0.930293	-1.04634	0.110938	-0.56851	-0.610332	34	34	34	60.1	60.1	60.1	84.73	0	323.31	7741300000	442	1.0064	1.32255	0.982015	B4F7E8;Q3MHT9	B4F7E8			0.0985372	0.0475828	0.104228
Scyl1	N-terminal kinase-like protein	7	1.80093	1.15285	0.623984	-1.11156	-0.524908	-0.627622	0.0474362	-1.00042	-0.360695	22	22	22	38.5	38.5	38.5	89.125	0	181.28	1298400000	143	1.11293	1.4468	1.10056	Q5M9F8	Q5M9F8			0.0771028	0.0357437	0.0793305
Pcna	Proliferating cell nuclear antigen	7	1.1024	1.28956	1.08307	-1.32253	-1.22692	-0.533574	-0.158109	-0.539591	0.3057	14	14	14	62.8	62.8	62.8	28.748	0	190.04	5720400000	233	1.53756	1.78809	1.43103	P04961	P04961			0.0290028	0.0162896	0.0370655
LOC100361913		7	1.18238	0.897768	1.1536	-1.53302	-0.981965	-0.566045	-0.504546	-0.331003	0.682833	2	2	2	25	25	25	10.693	0	5.8089	1306200000	66	1.16287	1.37789	1.03467	D3ZE02	D3ZE02			0.0687274	0.04189	0.0923273
Ptgfrn	Prostaglandin F2 receptor negative regulator	7	0.957009	1.23457	1.36124	-1.3801	-0.868635	-0.270799	-0.832303	-0.462103	0.261128	30	30	30	37.7	37.7	37.7	98.667	0	209.76	3854300000	217	1.17349	1.49079	1.14279	F1M790;Q62786	F1M790;Q62786			0.0670672	0.0323006	0.0719797
Spag9		7	1.34311	1.0927	0.993961	-1.32997	-1.25797	-0.0518226	-0.411009	-0.647409	0.268412	51	51	2	44.7	44.7	1.9	146	0	323.31	5555200000	382	1.06995	1.36436	1.02177	E9PSJ4	E9PSJ4			0.0851236	0.0432155	0.0951108
Serpinb9		7	1.38085	1.45072	0.564088	-1.15805	-0.730232	-0.743361	-0.255721	-0.978375	0.470081	17	17	17	59.1	59.1	59.1	42.301	0	253	15066000000	397	1.02706	1.31822	0.97791	Q6AYF8;D4A392;M0R455	Q6AYF8			0.0939593	0.0480596	0.105218
Chmp2a		7	0.974071	1.43351	1.20022	-1.31771	-0.739279	-0.480933	-0.229999	-0.983824	0.143949	8	8	8	32.9	32.9	32.9	25.134	0	14.993	466880000	21	1.27346	1.59522	1.24353	B2RZB5	B2RZB5			0.053277	0.0253969	0.0570782
Rpl30	60S ribosomal protein L30	7	0.926872	1.26837	1.16272	-1.66355	-0.461899	-0.725157	0.127699	-0.794858	0.159807	8	8	8	66.1	66.1	66.1	12.784	0	263	11507000000	230	1.11397	1.37806	1.03483	P62890;A0A0G2K5E6;M0RD99;M0R764;M0R924;M0RA78	P62890;A0A0G2K5E6			0.0769184	0.0418736	0.0922933
Celf1	CUGBP Elav-like family member 1	7	1.35898	1.37258	0.779377	-0.907077	-0.758425	-1.41015	0.227894	-0.290332	-0.372843	11	10	10	25.5	23.4	23.4	52.205	0	35.766	1167200000	97	1.61094	1.86754	1.5087	Q4QQT3	Q4QQT3			0.024494	0.0135663	0.0309956
LOC100912917		7	1.13926	1.26849	1.15258	-1.08325	-0.948662	-1.15344	0.222508	-0.556385	-0.0410914	27	27	27	30.4	30.4	30.4	144.39	0	198.9	1768700000	133	2.04666	2.29488	1.92955	A0A0G2JTN4;D4AB17	A0A0G2JTN4;D4AB17			0.00898132	0.00507131	0.0117612
Faf1	FAS-associated factor 1	7	1.24002	1.14767	1.13216	-1.31457	-0.848944	-0.877288	0.0679112	-0.768858	0.221896	14	14	14	22.2	22.2	22.2	69.722	0	36.749	867110000	74	1.57631	1.83876	1.48054	F1LSQ0;Q924K2	F1LSQ0;Q924K2			0.0265271	0.0144957	0.033072
Stk10	Serine/threonine-protein kinase 10	8	0.564675	0.417081	1.54447	0.678616	0.266135	0.163217	-1.29129	-0.895984	-1.44693	16	14	14	18.4	16.3	16.3	113.21	0	27.896	300700000	35	1.31602	1.24032	0.904275	H9KVF6;E9PTG8;Q62830;A0A0G2K7Z9	H9KVF6;E9PTG8;Q62830;A0A0G2K7Z9			0.0483037	0.0575016	0.124659
Tspan7	Tetraspanin	8	0.963828	1.43554	1.17986	-0.0604885	0.182664	-0.65493	-1.20894	-0.883786	-0.953745	3	3	3	10.9	10.9	10.9	22.336	0	9.28	126110000	15	1.7543	2.02409	1.66235	F1M8Y2;F1M9I6;B3STU1;B0BNE7	F1M8Y2;F1M9I6;B3STU1;B0BNE7			0.0176076	0.00946041	0.0217596
Nid1		8	0.726696	1.35995	1.23417	0.394705	-0.316257	-0.227553	-1.50379	-1.09787	-0.570044	44	43	43	45.5	44.7	44.7	137.04	0	323.31	10269000000	553	1.37893	1.59301	1.24139	F1LM84;P08460	F1LM84			0.0417898	0.0255264	0.0573601
Ackr3	Atypical chemokine receptor 3	8	0.883928	1.21391	1.22505	0.123543	0.0955409	-0.060106	-1.21423	-1.42616	-0.841475	2	2	2	7.5	7.5	7.5	41.649	0	50.163	191960000	13	2.20773	2.36322	1.99719	O89039	O89039			0.00619826	0.00433291	0.0100649
Cdh11		8	1.29678	1.43704	0.689386	0.187969	-0.154448	-0.314588	-1.16603	-1.38031	-0.595804	16	16	16	29	29	29	88.035	0	105.29	732120000	66	1.5194	1.75383	1.3976	F1MAH6	F1MAH6			0.0302413	0.0176267	0.0400313
Ahnak2		8	0.983858	1.24909	0.864862	0.162664	0.448556	-0.08617	-1.29495	-1.39006	-0.937846	95	95	95	45.4	45.4	45.4	584.8	0	323.31	17537000000	1140	2.0685	2.14286	1.77935	F1LUD3	F1LUD3			0.00854083	0.00719681	0.0166207
		8	1.35698	1.24548	0.708776	0.157647	0.283953	-0.372533	-1.21248	-1.22699	-0.940828	222	222	191	74.2	74.2	63.1	581.12	0	323.31	300100000000	6768	1.76228	1.93693	1.57672	A0A0G2JUA5;A0A0G2JU96;Q38PG2;Q38PF8;Q38PG0;Q8VHJ0;Q38PG3;Q8VHI9	A0A0G2JUA5;A0A0G2JU96			0.017287	0.011563	0.0265021
Eftud1		8	0.514586	1.23432	1.1991	0.622973	-0.26952	0.131507	-0.803136	-1.62535	-1.00448	33	33	33	44.1	44.1	44.1	125.69	0	221.23	2177400000	202	1.29476	1.38738	1.04372	D3ZXJ5	D3ZXJ5			0.0507271	0.0409845	0.0904232
Eml1	Echinoderm microtubule-associated protein-like 1	8	0.649805	0.977108	1.27895	0.0914315	0.115255	0.408272	-1.39523	-1.60742	-0.518158	30	30	29	46.4	46.4	45.3	86.532	0	323.31	7094000000	394	1.40386	1.46377	1.11684	Q4V8C3-2;Q4V8C3;M0RCT5;M0RDD8;Q6ED65-3;Q6ED65-4	Q4V8C3-2;Q4V8C3;M0RCT5;M0RDD8			0.0394584	0.034374	0.0764117
Thy1	Thy-1 membrane glycoprotein	8	0.731685	1.15119	1.00634	-0.0896642	0.08446	0.753743	-1.50247	-1.12344	-1.01185	5	5	5	33.5	33.5	33.5	18.172	0	66.337	1605000000	81	1.66646	1.68725	1.33279	P01830	P01830			0.0215546	0.0205471	0.046474
Rock2	Rho-associated protein kinase 2	8	1.0653	0.930358	0.942209	-0.0449482	0.148965	0.639866	-1.55359	-1.06695	-1.0612	66	66	58	49.6	49.6	43.5	159.44	0	323.31	4728900000	417	1.91957	1.93824	1.578	F1LQT3;A0A0G2K5N6;Q62868	F1LQT3;A0A0G2K5N6;Q62868			0.0120346	0.0115282	0.0264241
Cd63	Tetraspanin;CD63 antigen	8	0.856413	0.761527	0.978101	0.578529	0.344342	0.292956	-1.74899	-1.07706	-0.985818	4	4	4	39.5	39.5	39.5	13.839	0	8.7662	3848700000	63	1.92391	1.79393	1.43673	Q9QZV0;F1LPA7;A0A0G2K0T2;P28648	Q9QZV0;F1LPA7;A0A0G2K0T2;P28648			0.0119149	0.016072	0.0365822
Eps15		8	1.11585	1.09582	0.870376	0.013662	-0.151356	0.563598	-1.50958	-1.29934	-0.699026	22	22	22	40	40	40	86.728	0	158.67	729180000	96	1.61427	1.71597	1.36073	Q5JC29;E9PSY8;A7BFV9	Q5JC29;E9PSY8;A7BFV9			0.0243069	0.0192322	0.0435783
Atp2b1	Plasma membrane calcium-transporting ATPase 1;Calcium-transporting ATPase	8	0.763857	0.995027	0.654358	0.552532	0.734855	0.0302823	-1.79817	-0.806879	-1.12586	29	29	17	31.1	31.1	18.4	130.62	0	149.94	1891600000	172	1.46814	1.31504	0.974891	P11505-6;P11505-3;P11505-4;P11505;F1LRW6;P11505-5;P11505-2;F1LP22;P11506-14;P11506	P11505-6;P11505-3;P11505-4;P11505;F1LRW6;P11505-5;P11505-2			0.0340298	0.0484128	0.105952
Pigs	GPI transamidase component PIG-S	8	0.89929	1.31334	0.501093	0.280175	0.655251	-0.0472318	-1.68911	-0.849741	-1.06307	11	11	11	26.7	26.7	26.7	61.724	0	43.304	328730000	46	1.3828	1.37081	1.02792	Q5XI31	Q5XI31			0.041419	0.0425785	0.0937735
Capg	Macrophage-capping protein	8	0.893284	1.11559	0.383602	0.386703	0.420447	0.553417	-0.69594	-1.62981	-1.42729	15	15	15	55.3	55.3	55.3	38.798	0	323.31	6578900000	275	1.5166	1.34563	1.00395	Q6AYC4	Q6AYC4			0.0304369	0.0451201	0.0990946
Kif15	Kinesin-like protein KIF15	8	1.37318	0.934232	0.943198	-0.575563	0.229136	0.401012	-0.821069	-1.08748	-1.39664	6	6	6	6.2	6.2	6.2	159.64	0	6.1187	34720000	10	1.47178	1.65053	1.29713	A0A0G2K0M1;Q7TSP2	A0A0G2K0M1;Q7TSP2			0.0337458	0.0223599	0.050451
Hip1		8	1.28297	0.885996	1.06575	-0.675391	0.105792	0.579068	-0.8236	-1.10402	-1.31656	47	47	45	59	59	56.7	115	0	312.75	5445000000	367	1.35207	1.53956	1.18976	G3V8Y8;Q8VHU1	G3V8Y8			0.044456	0.0288695	0.0646011
Itpr3	Inositol 1,4,5-trisphosphate receptor type 3	8	1.34101	1.4733	0.735631	-0.475732	-0.460205	0.327918	-1.14949	-0.805215	-0.987219	41	36	36	17.7	16.2	16.2	304.21	0	74.314	1062500000	101	1.50727	1.78582	1.42881	C7E1V1;Q63269	C7E1V1;Q63269			0.0310978	0.016375	0.0372555
Comt	Catechol O-methyltransferase	8	1.07514	1.77232	0.336534	-0.156538	0.0205783	0.061095	-1.34881	-0.570001	-1.19032	13	13	13	68.2	68.2	68.2	29.597	0	173.83	2421600000	135	1.13701	1.33967	0.998283	F2W8B0;P22734-2;P22734	F2W8B0;P22734-2;P22734			0.0729441	0.0457436	0.100396
Loxl4		8	1.08026	1.06928	1.61408	-0.573638	-0.941955	-0.372064	-0.816835	-1.03034	-0.0287851	6	6	6	9.6	9.6	9.6	84.742	0	27.131	148250000	12	1.41068	1.76724	1.41068	D4A9V5	D4A9V5			0.0388436	0.0170907	0.0388436
Plcd1	Phosphoinositide phospholipase C;1-phosphatidylinositol 4,5-bisphosphate phosphodiesterase delta-1	8	1.21561	1.02721	1.55081	-0.771745	-0.664635	-0.34796	-1.02093	-0.926023	-0.0623359	21	21	21	32	32	32	85.909	0	146.82	833520000	82	1.50347	1.8615	1.50279	G3V9D1;P10688;A6Y857;D4AAX6	G3V9D1;P10688;A6Y857			0.0313711	0.0137562	0.0314203
Slc6a6	Sodium- and chloride-dependent taurine transporter	8	0.776225	1.18688	1.68381	-1.26655	-0.334666	-0.17104	-1.01321	-0.503264	-0.35818	11	11	11	20	20	20	71.032	0	67.098	4093400000	122	1.15998	1.5085	1.15983	A0A0G2K227;P31643;Q9WTR3;F1LQW0;Q9WTR4;F1LNR9;R9PXV0;A0A0G2K0Z3;Q63380;A0A0G2JSN3;B4F7D9;P31646;P48056;P23977;P31647;P28570	A0A0G2K227;P31643			0.0691863	0.0310099	0.0692102
Cyp20a1	Cytochrome P450 20A1	8	0.992348	1.34454	1.40269	-0.965735	-0.705809	-0.0684422	-1.21213	-0.505791	-0.281662	23	23	23	64.3	64.3	64.3	51.967	0	104.3	2222900000	182	1.35688	1.71108	1.35597	F1LSK6;Q6P7D4	F1LSK6;Q6P7D4			0.0439663	0.01945	0.0440585
Hebp1		8	1.68413	1.0168	1.14673	-0.867638	-0.517602	-0.297909	-1.03097	-0.565884	-0.567661	9	9	9	75.3	75.3	75.3	21.124	0	87.064	1435000000	80	1.73338	2.09303	1.73022	B4F7C7	B4F7C7			0.0184765	0.00807179	0.0186114
2015-09-01	15 kDa selenoprotein	8	1.45357	1.45433	0.858774	-1.07776	-0.736159	-0.194773	-0.786898	-0.1674	-0.803681	6	6	6	49.7	49.7	49.7	17.672	0	59.574	1050600000	76	1.42645	1.78253	1.4256	A0A0G2KAY8;Q923V8	A0A0G2KAY8;Q923V8			0.0374585	0.0164995	0.0375319
Ag2	Uncharacterized protein C11orf96 homolog	8	1.46835	0.860616	1.223	-0.60103	-0.755006	0.330182	-1.30905	-0.84627	-0.370783	4	4	4	22.3	22.3	22.3	26.096	0	36.191	124020000	15	1.17543	1.49219	1.14414	A8IHN8	A8IHN8			0.0667683	0.0321966	0.0717563
Enpp1	Ectonucleotide pyrophosphatase/phosphodiesterase family member 1;Alkaline phosphodiesterase I;Nucleotide pyrophosphatase	8	1.3107	1.58633	0.984027	-0.627114	-0.973362	-0.46078	-0.893089	-0.556293	-0.370423	24	24	24	40.3	40.3	40.3	102.84	0	246.94	3282900000	161	1.86196	2.22572	1.86116	Q924C3-2;Q924C3;G3V7V4;O88827	Q924C3-2;Q924C3;G3V7V4			0.0137417	0.00594675	0.013767
Esyt1	Extended synaptotagmin-1	8	1.36409	1.62103	0.84029	-0.60594	-0.538696	-0.270197	-0.800117	-1.06797	-0.542494	49	49	4	56.3	56.3	4.4	121.16	0	323.31	10920000000	499	1.78334	2.13311	1.76974	Q9Z1X1	Q9Z1X1			0.0164687	0.00736021	0.0169926
Scrn1	Secernin-1	8	1.34637	1.36264	0.993333	-0.728699	-0.765291	-0.0557455	-0.745122	-1.2861	-0.121383	19	19	19	52.7	52.7	52.7	46.396	0	260.68	10623000000	390	1.30104	1.64947	1.29609	Q6AY84	Q6AY84			0.0499988	0.0224145	0.050572
LOC100912534		8	1.64235	1.37294	0.449238	-0.749485	-0.352979	0.123557	-1.16624	-1.0364	-0.282978	7	7	7	51.3	51.3	51.3	17.143	0	34.946	988370000	81	1.0403	1.35066	1.00874	G3V678;Q9Z0W2	G3V678			0.0911381	0.0446005	0.0980077
Ctu2	Cytoplasmic tRNA 2-thiolation protein 2	8	1.32288	1.48154	0.817203	-0.47739	-0.882311	0.15043	-0.775622	-1.27509	-0.361636	4	4	4	10.6	10.6	10.6	57.74	0	6.8755	72706000	7	1.23548	1.56626	1.21553	A0A0G2JUT8;Q3B7U4	A0A0G2JUT8;Q3B7U4			0.058146	0.0271481	0.0608793
Nedd4	E3 ubiquitin-protein ligase NEDD4	8	0.846463	1.42619	1.25211	-1.10629	-0.597541	0.376041	-0.68989	-1.17055	-0.336519	44	44	39	57.3	57.3	50.5	102.43	0	323.31	14733000000	630	1.02363	1.35546	1.0133	A0A0G2K0B4;A0A0G2K8P3;Q62940;Q6P778;D4ADD3;F1M4Q8	A0A0G2K0B4;A0A0G2K8P3;Q62940			0.0947044	0.0441103	0.096984
Map6	Microtubule-associated protein 6	8	0.879665	0.869644	1.50342	-0.656825	0.185525	0.419539	-1.29422	-1.14693	-0.759817	33	33	33	47.6	47.6	47.6	100.44	0	207.01	4425000000	472	1.31855	1.51675	1.16778	F1LQZ9;Q63560;Q63560-2	F1LQZ9;Q63560			0.0480231	0.0304264	0.0679548
Diaph1		8	1.27563	1.02948	1.35919	-0.903576	-0.262341	0.229266	-0.862197	-1.08168	-0.783769	32	32	32	28.1	28.1	28.1	140.3	0	98.928	1132800000	122	1.54044	1.85393	1.49538	F1M775	F1M775			0.0288111	0.0139981	0.031961
Igfbp7		8	1.3747	0.962221	1.36272	-1.04482	-0.210703	0.0603505	-0.877112	-1.03065	-0.596715	6	6	1	35.9	35.9	8.5	28.912	0	27.458	324930000	32	1.44491	1.77804	1.42122	Q5RJM3	Q5RJM3			0.0358996	0.0166709	0.0379123
Thbs1		8	1.12588	1.10806	1.61578	-0.497292	-0.196714	-0.608344	-1.07045	-0.713581	-0.763349	57	57	7	52.4	52.4	7.8	129.67	0	323.31	39675000000	1268	2.074	2.41915	2.05261	Q71SA3	Q71SA3			0.00843335	0.00380934	0.00885911
Pacsin3		8	0.873754	0.973094	1.60886	-0.441448	0.304379	-0.392703	-1.49195	-0.665097	-0.768896	14	14	14	38.9	38.9	38.9	48.64	0	131.46	1391600000	135	1.30929	1.5774	1.22629	Q5I2Z0;G3V9N7	Q5I2Z0;G3V9N7			0.049058	0.0264606	0.0593895
Anxa7	Annexin	8	0.841144	1.37531	1.53465	-0.689785	-0.420982	-0.638527	-1.27599	-0.579154	-0.146667	17	17	17	39.1	39.1	39.1	50.079	0	136.8	3466900000	219	1.38534	1.74036	1.38447	Q8VIN2;Q6IRJ7	Q8VIN2;Q6IRJ7			0.0411775	0.0181819	0.0412601
Vcan	Versican core protein	8	1.32894	1.23469	1.22532	-0.742663	-0.0366794	-0.256085	-1.09477	-0.916887	-0.741871	32	32	4	12.9	12.9	1.8	300	0	213.52	6237900000	312	2.07698	2.40202	2.03563	Q9ERB4;Q9ERB4-3;Q9ERB4-2;A0A0G2K944;D3ZFC3	Q9ERB4;Q9ERB4-3;Q9ERB4-2;A0A0G2K944;D3ZFC3			0.00837568	0.0039626	0.00921234
Taok3	Serine/threonine-protein kinase TAO3	8	1.28785	1.00528	1.09738	-0.57346	0.627484	-0.317691	-1.20676	-1.00166	-0.918418	13	10	10	13.1	10.7	10.7	105.47	0	12.14	136390000	27	1.43354	1.66538	1.31154	Q53UA7;F1LRI6	Q53UA7;F1LRI6			0.0368519	0.0216083	0.0488045
Loxl1		8	1.24069	1.32462	1.00409	-0.499813	-0.0176878	0.115342	-1.20454	-1.15084	-0.811855	10	10	10	17.6	17.6	17.6	66.589	0	53.333	281610000	40	2.02849	2.28064	1.91546	Q5FWS5	Q5FWS5			0.00936505	0.00524035	0.012149
A1m	Alpha-1-macroglobulin;Alpha-1-macroglobulin 45 kDa subunit	8	1.33585	1.13854	1.0327	-0.36115	0.247578	-0.827992	-1.51796	-0.771331	-0.276244	5	5	5	4.1	4.1	4.1	167.12	0	23.853	441110000	14	1.13053	1.43966	1.09372	Q63041	Q63041			0.0740406	0.0363362	0.0805898
Srpr		8	1.39262	0.806748	1.04609	0.0374771	0.16539	-0.293501	-1.74812	-0.981954	-0.424757	24	24	24	43.2	43.2	43.2	69.656	0	120.34	2505100000	159	1.25313	1.45803	1.11133	Q3KRC3	Q3KRC3			0.0558303	0.0348313	0.0773874
Rab31	Ras-related protein Rab-31	8	0.986832	0.92468	1.30901	-0.744161	0.767392	-0.239471	-1.40781	-0.772426	-0.824048	12	12	10	77.4	77.4	66.2	21.499	0	143.61	1293700000	118	1.08247	1.30712	0.967383	A0A0G2JSZ1;Q6GQP4;P97632	A0A0G2JSZ1;Q6GQP4			0.0827047	0.0493038	0.1078
Bgn	Biglycan	8	1.37584	0.993978	1.03779	-0.798161	0.292056	-0.0945745	-1.4971	-0.980187	-0.329648	12	12	11	44.4	44.4	42.3	41.706	0	86.445	3753300000	176	1.14349	1.41889	1.07383	P47853;Q63156	P47853			0.0718638	0.0381162	0.0843665
Csnk1g3;Csnk1g1;Csnk1g2	Casein kinase I isoform gamma-1;Casein kinase I isoform gamma-2;Casein kinase I isoform gamma-3	8	1.39911	1.16735	0.916175	-1.22767	0.41675	-0.463909	-1.03959	-0.885144	-0.283063	4	4	4	9.7	9.7	9.7	47.507	0	4.9045	148390000	10	0.975146	1.30273	0.963224	A0A0H2UHQ2;A0A0G2K7C4;A0A0A0MXY3;Q62761;Q62762;Q62763;Q499U5	A0A0H2UHQ2;A0A0G2K7C4;A0A0A0MXY3;Q62761;Q62762;Q62763			0.10589	0.0498047	0.108837
Ctsb	Cathepsin B;Cathepsin B light chain;Cathepsin B heavy chain	8	0.644673	1.49141	1.13232	-0.0950881	0.41142	-0.290187	-1.03526	-0.820225	-1.43906	15	15	15	53.4	53.4	53.4	37.544	0	323.31	27749000000	553	1.48317	1.66702	1.31313	Q6IN22;P00787	Q6IN22;P00787			0.0328723	0.0215268	0.0486262
F13a1	Coagulation factor XIII A chain	8	0.841911	1.19444	1.42751	-0.299235	0.147429	-0.792182	-0.334126	-0.550887	-1.63486	8	8	8	16.1	16.1	16.1	83.053	0	23.982	140970000	15	1.0538	1.36165	1.01919	G3V811;O08619;B5DF57	G3V811;O08619			0.0883487	0.0434861	0.0956775
Tgfb1	Transforming growth factor beta-1;Latency-associated peptide	8	1.0012	0.978777	1.51387	-0.176727	0.314352	-0.62718	-0.788946	-0.83557	-1.37978	5	5	5	19.2	19.2	19.2	44.328	0	31.405	169350000	21	1.46625	1.72983	1.37422	P17246	P17246			0.0341783	0.0186282	0.0422455
Atrn	Attractin	8	1.09456	1.3617	1.04867	0.388218	-0.385131	-0.921885	-0.556848	-0.608458	-1.42083	5	5	5	4	4	4	158.67	0	11.128	114550000	14	1.13807	1.44539	1.0992	Q99J86;Q99J86-2	Q99J86;Q99J86-2			0.0727663	0.03586	0.0795793
Hdlbp	Vigilin	8	0.743777	1.45699	1.24528	0.577314	-0.531836	-0.844482	-0.616137	-0.983353	-1.04755	66	66	66	57.6	57.6	57.6	141.69	0	323.31	26570000000	1181	1.09347	1.38912	1.04538	Q3KRF2;Q9Z1A6;Q6P513	Q3KRF2;Q9Z1A6			0.0806362	0.0408207	0.0900783
Gsn	Gelsolin	8	1.19386	1.16027	1.19575	0.246831	-0.169977	-0.843974	-0.535454	-1.4275	-0.819802	33	33	17	59	59	36	80.928	0	323.31	24023000000	781	1.34043	1.63578	1.28281	Q68FP1-2;Q68FP1	Q68FP1-2;Q68FP1			0.0456636	0.0231324	0.0521423
Pepd	Xaa-Pro dipeptidase	8	1.20786	0.967829	1.36909	-0.0724889	-0.671614	0.27419	-1.20075	-0.920939	-0.953183	21	21	21	53.7	53.7	53.7	54.75	0	182.79	3335700000	204	1.70245	1.96386	1.60316	Q5I0D7	Q5I0D7			0.0198404	0.0108678	0.0249368
Aldh16a1	Aldehyde dehydrogenase family 16 member A1	8	1.53904	0.575189	1.35374	-0.111936	-0.230963	0.0387673	-0.851506	-1.18771	-1.12463	19	19	19	35.2	35.2	35.2	85.413	0	160.81	2094100000	186	1.6623	1.90012	1.54062	Q3T1L0	Q3T1L0			0.0217621	0.0125858	0.0287992
Mfge8	Lactadherin	8	1.13403	1.24365	1.30753	-0.129134	-0.197385	-0.213542	-1.1614	-1.13325	-0.850501	29	29	29	71.9	71.9	71.9	47.412	0	323.31	37702000000	746	3.01195	3.28336	2.91265	P70490;Q1PBJ1;A0A0G2K506	P70490;Q1PBJ1;A0A0G2K506			0.000972859	0.000520763	0.00122278
Gas2		8	1.77933	0.887999	1.05064	0.060438	-0.641834	-0.740957	-0.96842	-0.611814	-0.815376	11	11	11	45.5	45.5	45.5	34.93	0	72.461	338670000	44	1.42589	1.76661	1.41006	G3V857;Q568Y1	G3V857			0.0375068	0.0171155	0.0388991
Efemp2		8	1.42067	1.16774	1.27284	-0.27875	-0.396807	-0.385297	-0.927199	-0.926371	-0.946828	15	15	15	39.1	39.1	39.1	49.387	0	158.77	1296400000	121	3.43495	3.76403	3.39253	A0A0G2K2R5;Q5XI84;A0A0G2KAI7	A0A0G2K2R5;Q5XI84;A0A0G2KAI7			0.000367325	0.000172175	0.000405014
Tln2		8	1.47348	0.956221	1.33134	-0.443046	-0.895107	0.0975769	-0.915402	-0.735795	-0.869272	70	51	51	32.3	25.8	25.8	271.68	0	274.82	1674900000	185	1.63102	1.9692	1.6084	D3ZA84;D4A3B0;D3ZE09;D3ZT58	D3ZA84;D4A3B0;D3ZE09;D3ZT58			0.0233873	0.0107349	0.0246377
Col3a1	Collagen alpha-1(III) chain	8	1.33322	1.20225	1.12466	-0.441753	-0.60505	0.204306	-0.66814	-0.798413	-1.35108	74	73	61	68.3	67.6	57.8	138.93	0	323.31	42903000000	1544	1.63373	1.93875	1.57851	P13941	P13941			0.0232418	0.0115146	0.0263931
P4ha3	Prolyl 4-hydroxylase subunit alpha-3	8	1.47766	0.98286	0.994934	0.395155	-0.205016	-0.576317	-1.28949	-0.685356	-1.09444	12	12	12	29	29	29	61.213	0	48.588	578040000	56	1.47597	1.72561	1.37011	F1LQ79;Q6W3E9	F1LQ79;Q6W3E9			0.0334218	0.0188101	0.0426471
Nrp2	Neuropilin-2	8	1.42276	1.11481	0.973227	0.184529	-0.467076	-0.0916793	-0.767358	-0.929928	-1.43929	15	15	15	19.9	19.9	19.9	103.9	0	27.174	278310000	32	1.72612	1.97423	1.61334	O35276	O35276			0.018788	0.0106113	0.024359
Postn		8	1.2123	1.31832	1.3275	-0.341452	-0.550886	-0.470831	-0.895457	-0.407724	-1.19176	26	26	16	48.3	48.3	31.7	90.055	0	181.48	2444800000	145	2.0498	2.39853	2.03218	D3ZAF5;A0A097BW25	D3ZAF5;A0A097BW25			0.00891661	0.00399457	0.00928581
Fn1	Fibronectin;Anastellin	8	1.08392	1.50719	1.26922	-0.24071	-0.423344	-0.467716	-0.871134	-0.89145	-0.965973	129	129	3	67.9	67.9	1.8	272.44	0	323.31	367990000000	5788	2.71459	3.0491	2.67904	A0A096P6L8;P04937;P04937-3;P04937-2;P04937-4;Q6LC76;Q9Z1G8;P97624	A0A096P6L8;P04937;P04937-3;P04937-2;P04937-4			0.00192935	0.0008931	0.00209392
Grb14	Growth factor receptor-bound protein 14	8	1.17404	1.38638	1.31897	-0.282266	-0.609154	-0.431201	-1.14437	-0.796209	-0.616189	11	11	11	30.7	30.7	30.7	60.537	0	65.689	475980000	40	2.33712	2.68456	2.31611	A0A0G2K3B0;O88900	A0A0G2K3B0;O88900			0.00460129	0.00206747	0.00482936
Rbm3		8	0.82744	1.1252	1.73661	-0.648403	-0.382588	0.0238524	-1.04115	-0.686877	-0.954085	8	1	1	60.9	11.5	11.5	16.983	0	65.757	1053300000	33	1.56223	1.88213	1.523	G3V6P6;Q5PPI5	G3V6P6			0.0274012	0.0131181	0.0299916
Hmox1	Heme oxygenase 1	8	0.793747	0.896561	1.63699	0.16275	-0.59521	0.263682	-0.900009	-0.93478	-1.32373	9	9	9	47.1	47.1	47.1	33.005	0	48.732	731770000	73	1.37128	1.58851	1.23704	P06762	P06762			0.0425324	0.0257923	0.0579375
Anxa4	Annexin;Annexin A4	8	1.39474	0.4282	1.47567	0.434059	-0.325988	-0.381216	-0.818496	-0.831085	-1.37589	23	23	23	73.4	73.4	73.4	35.893	0	323.31	8649000000	341	1.18522	1.41837	1.07333	Q5U362;P55260	Q5U362;P55260			0.06528	0.0381619	0.0844637
Ddx3y		8	0.721821	1.51679	1.55274	-0.998218	-0.768462	-0.560229	-0.254945	-0.417625	-0.791875	44	44	5	66.5	66.5	13.3	73.145	0	323.31	18467000000	720	1.59746	1.9477	1.58729	A0A0G2K719;D3ZN21;D4ADE8	A0A0G2K719;D3ZN21			0.0252662	0.0112798	0.0258649
Lama5		8	0.482695	1.53382	1.70186	-0.688067	-0.623989	-0.525669	-0.328943	-0.593015	-0.958689	104	104	104	39.5	39.5	39.5	403.77	0	323.31	26860000000	1365	1.30056	1.65405	1.30054	F1MAN8;P70636	F1MAN8			0.0500541	0.0221794	0.0500564
Prrx1	Paired mesoderm homeobox protein 1	8	1.13879	1.40924	1.04235	-0.201038	-0.591599	-0.438486	-0.00234091	-0.810667	-1.54624	4	4	4	20.7	20.7	20.7	24.369	0	46.86	325160000	22	1.16276	1.49335	1.14526	P63014-2;P63014;A0A0G2JXV9	P63014-2;P63014;A0A0G2JXV9			0.0687448	0.0321107	0.0715715
Gpc1	Glypican-1;Secreted glypican-1	8	0.719183	1.53275	1.52042	-0.28105	-0.800059	-0.585599	-0.441138	-0.53238	-1.13213	22	22	22	57.5	57.5	57.5	61.628	0	116.02	1549500000	129	1.45856	1.81359	1.45594	Q6P7Q2;P35053	Q6P7Q2;P35053			0.0347888	0.0153607	0.0349994
Nptn	Neuroplastin	8	1.39799	1.06229	1.13088	0.18859	-0.0256845	-1.10798	-0.73203	-1.01506	-0.899003	6	6	6	26.7	26.7	26.7	31.292	0	21.757	1441800000	80	1.31085	1.62292	1.27035	P97546-1;D3ZDF0;P97546-3;P97546	P97546-1;D3ZDF0;P97546-3;P97546			0.0488821	0.0238276	0.0536599
Glul	Glutamine synthetase	8	1.3516	1.29257	1.24804	-0.547365	-0.152474	-0.973624	-0.702295	-0.633745	-0.88271	11	11	11	28.2	28.2	28.2	42.267	0	38.208	1148900000	49	1.99223	2.35412	1.98818	P09606	P09606			0.0101805	0.00442466	0.0102759
Gnai2	Guanine nucleotide-binding protein G(i) subunit alpha-2	8	1.62504	1.38468	0.651469	-0.216938	-0.326879	-1.18765	-0.723529	-0.285224	-0.920972	21	21	13	67.9	67.9	46.2	40.499	0	323.31	13520000000	389	1.18811	1.5373	1.18758	Q45QN0;P04897;Q5EEY4;Q5EEY3;P10824	Q45QN0;P04897;Q5EEY4;Q5EEY3			0.064847	0.0290202	0.0649262
Pbx1		8	1.48566	0.845106	1.22665	-0.502577	-0.136446	-1.21846	-1.02504	0.181986	-0.856886	4	2	2	12.4	7.2	7.2	38.427	0	4.277	59843000	5	1.02125	1.36345	1.02091	B1WC30;F7EV88;D3ZJI6;A0A0G2JWV9	B1WC30;F7EV88;D3ZJI6			0.0952248	0.0433062	0.0952994
Lmna;C2.1	Prelamin-A/C;Lamin-A/C	8	1.26459	1.47406	1.05677	-0.0956963	-0.462461	-1.05737	-0.504229	-0.601227	-1.07443	56	56	55	72.8	72.8	72.8	74.311	0	323.31	116390000000	1930	1.54701	1.90221	1.54267	G3V8L3;P48679;A0A0G2JTC5;P70482;Q6P6U3;A0A0G2K3R2;O35829	G3V8L3;P48679;A0A0G2JTC5;P70482;Q6P6U3;A0A0G2K3R2			0.0283785	0.0125254	0.0286636
Smad4	Mothers against decapentaplegic homolog 4	8	1.37001	0.994171	1.35765	-0.0930324	-0.894357	-0.622895	-0.943506	-0.0728609	-1.09519	6	6	6	12.1	12.1	12.1	60.469	0	40.148	133860000	16	1.33406	1.68504	1.33064	O70437;A0A0G2JXW2;A0A0G2K970	O70437;A0A0G2JXW2;A0A0G2K970			0.0463383	0.0206519	0.0467046
Hspb1	Heat shock protein beta-1	8	1.18205	1.10163	1.45708	-0.539402	-1.41702	-0.315412	-0.58985	-0.181269	-0.697809	17	16	16	88.8	85.4	85.4	22.807	0	323.31	59738000000	885	1.42623	1.77415	1.41742	G3V913;P42930	G3V913;P42930			0.0374774	0.0168209	0.0382455
Vcl	Vinculin	8	1.01337	1.35788	1.50674	-0.577154	-1.10475	-0.655831	-0.347963	-0.448828	-0.743466	83	83	83	77.4	77.4	77.4	116.57	0	323.31	111280000000	2678	1.99431	2.35154	1.98562	R9PXU6;A0A0G2K8V2;P85972	R9PXU6;A0A0G2K8V2;P85972			0.0101319	0.00445102	0.0103367
Ptrf		8	0.998697	1.18065	1.5006	-0.383048	-1.34088	-0.774736	-0.347405	-0.00244864	-0.831424	18	18	2	49	49	6.6	43.908	0	323.31	19204000000	532	1.39512	1.72666	1.37113	G3V8L9	G3V8L9			0.0402606	0.0187646	0.0425471
Clic4	Chloride intracellular channel protein;Chloride intracellular channel protein 4	8	1.2626	1.06084	1.30328	-0.316741	-0.642823	-1.19072	-0.187387	-0.018187	-1.27086	19	19	19	77.1	77.1	77.1	28.669	0	323.31	22193000000	555	1.16022	1.50247	1.15403	G3V8C4;A3FM27;Q9Z0W7;F1M9X4;A0A0G2JTB6;Q811Q2	G3V8C4;A3FM27;Q9Z0W7			0.0691481	0.0314434	0.0701407
Lamc1		8	0.966818	1.41991	1.46974	-0.624081	-0.636696	-0.881591	-0.536354	-0.179179	-0.998568	71	71	70	51.3	51.3	50.5	177.38	0	323.31	21928000000	981	1.76423	2.125	1.76174	F1MAA7;P97552;A0A0U1RS20	F1MAA7			0.0172096	0.00749894	0.0173085
Tbl1xr1		8	1.2153	1.06277	1.28417	-0.297588	-0.452866	-1.41211	-0.418291	0.141867	-1.12325	10	6	6	28.8	16.5	16.5	55.67	0	22.47	303790000	20	1.06569	1.40206	1.05774	D3ZNF4	D3ZNF4			0.0859627	0.0396223	0.0875508
Gpc6		8	0.738627	1.66628	1.32294	-0.286436	-0.98792	-0.848516	-0.687889	-0.10072	-0.81636	18	15	15	43.2	37.5	37.5	62.957	0	65.815	881280000	55	1.35016	1.70136	1.34651	A0A096MJY1	A0A096MJY1			0.0446519	0.0198902	0.0450288
Atp2b4	Calcium-transporting ATPase;Plasma membrane calcium-transporting ATPase 4	8	1.27838	1.36801	1.25973	-0.420184	-0.872472	-0.776021	-0.83428	-0.211562	-0.791597	26	16	15	28.1	17.3	16.7	128.79	0	82.585	778790000	57	2.01619	2.38167	2.01547	D3ZH00;Q64542-3;Q64542-2;F1LSX8;Q64542-4;Q64542	D3ZH00;Q64542-3;Q64542-2;F1LSX8;Q64542-4;Q64542			0.00963407	0.00415269	0.00965006
Plec	Plectin	8	1.16527	1.16034	1.61127	-0.829753	-0.752258	-0.40523	-0.618058	-0.744543	-0.587044	337	337	7	70.5	70.5	1.7	533.82	0	323.31	165190000000	5515	2.25712	2.62519	2.2571	Q6S3A0;P30427	Q6S3A0;P30427			0.00553197	0.00237034	0.00553223
Man2a1	Alpha-mannosidase 2	8	0.94639	1.10349	1.79288	-0.756587	-0.773783	-0.341151	-0.417495	-0.735954	-0.817785	27	27	26	30.9	30.9	30.2	131.24	0	103.48	1463200000	117	1.67136	2.03311	1.67123	P28494;Q7TP82	P28494			0.0213128	0.00926595	0.0213192
		8	1.24558	1.0164	1.51664	-0.763539	-0.456096	-0.196282	-0.277745	-0.909998	-1.17495	28	28	15	33.4	33.4	19.7	122.65	0	205.79	1298200000	128	1.57623	1.92392	1.56395	D3ZBI5	D3ZBI5			0.026532	0.0119146	0.0272929
Gmpr	GMP reductase;GMP reductase 1	8	1.32138	1.17398	1.35592	-0.632453	-0.432368	-0.457288	-0.512691	-0.502942	-1.31353	12	12	11	45.5	45.5	42.6	37.458	0	31.987	527750000	34	1.8392	2.19448	1.8303	F1LRV6;Q9Z244	F1LRV6;Q9Z244			0.014481	0.00639028	0.0147809
Cdh13		8	1.43246	1.24555	1.25806	-0.908414	-0.533791	-0.33843	-0.837403	-0.560544	-0.757493	17	17	17	34.2	34.2	34.2	78.085	0	121.8	1594300000	96	2.31136	2.67786	2.30945	Q8R490;F1M7X3	Q8R490;F1M7X3			0.00488247	0.00209962	0.00490399
Myo7a		8	1.30607	1.34438	1.31706	-0.899162	-0.579075	-0.719368	-0.70051	-0.65374	-0.415656	63	63	59	34.9	34.9	32.8	251.11	0	204.13	2165000000	189	2.8616	3.22969	2.85911	Q8CJE3	Q8CJE3			0.00137531	0.000589264	0.00138322
Myo1d	Unconventional myosin-Id	8	1.41774	1.24235	1.30549	-0.667576	-0.568078	-0.499106	-0.946405	-0.688072	-0.596356	53	53	53	60.2	60.2	60.2	116.09	0	323.31	5333300000	366	2.88107	3.24835	2.87772	Q63357;A0A0G2K6E3;Q5M810	Q63357			0.00131501	0.000564482	0.0013252
Anxa8	Annexin A8	8	1.4016	1.24388	1.30518	-0.557715	-0.396947	-0.579531	-0.780131	-0.9464	-0.689942	18	18	18	63.9	63.9	63.9	36.706	0	42.715	1130600000	68	3.12158	3.48204	3.11093	Q4FZU6	Q4FZU6			0.000755823	0.000329579	0.000774587
Serpine1	Plasminogen activator inhibitor 1	8	1.03815	1.34476	1.52426	-0.467384	-0.920261	-0.362207	-0.808201	-0.79845	-0.550674	9	9	9	25.4	25.4	25.4	45.041	0	41.924	495570000	30	2.05874	2.42306	2.05649	F1LM16;P20961	F1LM16;P20961			0.00873494	0.0037752	0.00878031
Grem2	Gremlin	8	1.30955	1.23195	1.37412	-0.611422	-0.524644	-0.521803	-0.944887	-0.97518	-0.337682	5	5	5	38.1	38.1	38.1	19.348	0	20.036	219510000	23	2.19802	2.56077	2.19311	D3ZXD0;O35793	D3ZXD0			0.00633841	0.00274935	0.00641047
		8	1.30253	1.35255	1.32937	-0.706584	-0.657867	-0.446947	-0.744513	-0.727027	-0.701511	115	115	109	46.4	46.4	44.1	342.52	0	323.31	16872000000	778	3.44701	3.81679	3.44524	A0A0G2KAJ7	A0A0G2KAJ7			0.000357265	0.000152479	0.000358724
		8	1.49919	1.03057	1.28447	-0.683033	-0.623424	-0.322721	-0.68998	-0.253855	-1.24122	3	3	3	30.6	30.6	30.6	16.21	0	8.6211	193710000	21	1.61134	1.96791	1.60714	A0A0G2JZZ4	A0A0G2JZZ4			0.0244715	0.0107669	0.0247093
Sncg	Gamma-synuclein	8	1.49754	1.22865	1.2054	-0.695304	-0.285072	-0.75274	-0.899589	-0.722482	-0.5764	7	7	7	65.9	65.9	65.9	13.045	0	92.943	436900000	73	2.29743	2.6628	2.29449	A0A0G2K0T6;F1LQ96;Q63544;A0A0G2JSQ1;Q63754	A0A0G2K0T6;F1LQ96;Q63544			0.00504162	0.0021737	0.00507586
Fbln5	Fibulin-5	8	1.11008	1.2902	1.5253	-0.947407	-0.584932	-0.371587	-0.518972	-0.766016	-0.73666	12	12	12	29.7	29.7	29.7	50.16	0	219.33	5145300000	245	2.15517	2.52236	2.15498	Q9WVH8	Q9WVH8			0.00699568	0.00300359	0.00699874
Lamb2	Laminin subunit beta-2	8	0.962433	1.45308	1.49549	-0.976318	-0.711538	-0.435547	-0.511056	-0.620754	-0.655797	59	59	59	40.8	40.8	40.8	196.53	0	323.31	5977700000	399	2.07057	2.43572	2.06904	M0R6K0;P15800;Q5M7W9	M0R6K0;P15800;Q5M7W9			0.00850022	0.00366674	0.00853022
Fbn1		8	1.15018	1.50853	1.30834	-0.811387	-0.56244	-0.679054	-0.757384	-0.503597	-0.653182	97	97	97	42.4	42.4	42.4	311.95	0	323.31	16651000000	969	2.69343	3.06328	2.69317	G3V9M6;Q9WUH8;Q9WUH9;F1M5Q4	G3V9M6;Q9WUH8			0.00202568	0.00086441	0.00202689
Hspg2		8	0.968366	1.47761	1.48982	-0.725411	-0.638646	-0.461306	-0.645484	-0.62567	-0.839274	88	88	88	48.9	48.9	48.9	263.11	0	323.31	46217000000	1707	2.28099	2.64811	2.27988	F1LTJ5	F1LTJ5			0.00523612	0.00224849	0.00524952
Lama4		8	1.00342	1.62913	1.23825	-0.744943	-0.64361	-0.209178	-0.761994	-0.567671	-0.943402	10	10	10	8	8	8	196.95	0	49.191	93068000	20	1.90074	2.25946	1.89452	F1LTF8	F1LTF8			0.0125678	0.00550225	0.0127491
Slmap	Sarcolemmal membrane-associated protein	8	1.16606	1.1996	1.56489	-0.976903	-0.694623	-0.632726	-0.641105	-0.589787	-0.395404	32	32	3	39.3	39.3	4.6	90.559	0	182.15	4481200000	215	2.40704	2.76968	2.40077	D3ZKE6;A0A0G2JWA5;P0C219	D3ZKE6;A0A0G2JWA5;P0C219			0.00391706	0.0016995	0.00397402
Ltbp1	Latent-transforming growth factor beta-binding protein 1	8	1.127	1.50979	1.28881	-1.06446	-0.61584	-0.577503	-0.648076	-0.552232	-0.467496	43	43	43	31.4	31.4	31.4	186.6	0	296.04	4667700000	302	2.29309	2.65663	2.28835	D3ZAA3;Q00918	D3ZAA3;Q00918			0.00509225	0.0022048	0.00514814
Capn1	Calpain-1 catalytic subunit	8	0.903911	1.1324	1.66516	-0.429742	-0.087912	-1.04522	-0.258257	-1.00509	-0.875251	35	35	35	60.9	60.9	60.9	82.118	0	204.48	2597400000	224	1.29592	1.64464	1.29141	P97571;F1LS29	P97571;F1LS29			0.0505918	0.0226652	0.0511199
Loxl3		8	1.32404	0.706201	1.73408	-0.0793535	-0.780635	-0.672498	-0.816787	-0.658004	-0.757043	9	9	9	18	18	18	83.628	0	38.585	303360000	28	1.47333	1.82456	1.46666	D3ZP82	D3ZP82			0.0336256	0.0149775	0.034146
Samd9l		8	0.951429	1.02482	1.75197	-0.20034	-0.169628	-0.726165	-0.685469	-0.888575	-1.05804	35	35	1	26.1	26.1	0.6	178.77	0	155.4	1344700000	121	1.6283	1.95603	1.59547	A0A0G2JVT8;Q4G053	A0A0G2JVT8;Q4G053			0.0235342	0.0110655	0.0253822
2009-09-01		8	0.891302	0.931203	1.69165	0.357442	-0.671575	-1.25214	-0.696545	-0.449546	-0.801788	41	41	0	77.6	77.6	0	62.031	0	323.31	16210000000	662	0.97133	1.30919	0.969351	B2GVB4;Q9QZR6-2;Q9QZR6-3;Q9QZR6-4	B2GVB4;Q9QZR6-2;Q9QZR6-3;Q9QZR6-4			0.106824	0.0490693	0.107312
Hspb6	Heat shock protein beta-6	8	0.889555	1.25221	1.71619	-0.479092	-0.442976	-0.807967	-0.592485	-0.559166	-0.976265	8	8	8	89.5	89.5	89.5	17.505	0	211.47	1614400000	78	1.76611	2.12725	1.76396	P97541	P97541			0.0171352	0.00746019	0.0172203
Anxa11	Annexin	8	1.03824	1.31249	1.54181	-0.690516	-0.510233	-1.02131	-0.549891	-0.323892	-0.796696	15	15	14	34.8	34.8	33	54.16	0	202.71	3168200000	142	1.99646	2.3583	1.99232	Q5XI77	Q5XI77			0.0100818	0.00438228	0.0101784
Iqgap1		8	1.33342	1.25913	1.35284	-0.388358	-0.850389	-0.937631	-0.512407	-0.652388	-0.604223	88	88	84	67.9	67.9	65.6	188.83	0	323.31	36121000000	1550	2.43901	2.80585	2.43676	G3V7Q7;B5DFH1	G3V7Q7;B5DFH1			0.00363907	0.00156369	0.00365797
Pgm5		8	1.17407	1.18423	1.56357	-0.601985	-0.812291	-0.849316	-0.276827	-0.692261	-0.689196	33	33	33	72.1	72.1	72.1	62.204	0	323.31	12546000000	498	2.26197	2.62506	2.25698	D3ZVR9	D3ZVR9			0.00547054	0.00237105	0.00553376
Trim47		8	1.04878	1.44355	1.42785	-0.662843	-0.708826	-0.651948	-0.61489	-0.965799	-0.315874	14	14	14	24.3	24.3	24.3	70.027	0	67.998	446320000	36	2.11048	2.47729	2.11026	D3ZA22	D3ZA22			0.0077539	0.00333204	0.00775783
Emilin1		8	1.19281	1.50261	1.28197	-0.603996	-0.535608	-0.794144	-0.650915	-0.693034	-0.699696	38	38	38	53.4	53.4	53.4	94.504	0	323.31	6611300000	343	2.93675	3.30735	2.93658	D3Z9E1	D3Z9E1			0.00115678	0.000492777	0.00115723
Nid2	Nidogen-2	8	0.998868	1.49352	1.30479	-0.0756541	-0.335718	-1.09378	-0.719264	-0.774076	-0.798678	47	47	46	53.7	53.7	52.9	152.97	0	323.31	5659800000	341	1.59867	1.95068	1.59021	B5DFC9;W4VSR4;B5DFC9-2	B5DFC9;W4VSR4			0.0251959	0.0112026	0.0256915
Hspb7		8	1.26228	1.34025	1.35469	-0.430092	-0.527356	-0.883342	-0.611378	-0.865236	-0.639825	5	5	5	40.8	40.8	40.8	18.618	0	37.841	367790000	31	2.5587	2.92729	2.55766	B5DFG4;Q9QUK5	B5DFG4			0.00276249	0.00118225	0.00276911
Tpst2	Protein-tyrosine sulfotransferase 2	8	1.25326	1.06975	1.58625	-0.435575	-0.354973	-0.866203	-0.783548	-0.804644	-0.664325	4	4	4	11.4	11.4	11.4	42.068	0	7.6792	152850000	13	2.1397	2.50209	2.13487	Q5RJS8;Q6AYS9;Q3KR92	Q5RJS8			0.00724937	0.0031471	0.00733044

## Sheet: Cluster_1_late up
Pathway identifier	Pathway name	#Entities found	#Entities total	Entities ratio	Entities pValue	Entities FDR	#Reactions found	#Reactions total	Reactions ratio
R-HSA-70326	Glucose metabolism	7	127	0.0551181	1.66866e+10	3.68774e+16	7	75	0.0933333
R-HSA-6798695	Neutrophil degranulation	11	480	0.0229167	2.10698e+12	1.5381e+16	7	10	0.7
R-HSA-71387	Metabolism of carbohydrates	9	442	0.020362	1.85707e+16	6685439696692086	14	234	0.0598291
R-HSA-535734	Fatty acid, triacylglycerol, and ketone body metabolism	6	430	0.0139535	5.39529e+16	3.04849e+16	5	151	0.0331126
R-HSA-556833	Metabolism of lipids and lipoproteins	17	1402	0.0121255	5856577997275125	1.38298e+16	38	898	0.0423163
R-HSA-446203	Asparagine N-linked glycosylation	5	414	0.0120773	1.19832e+16	3.0495e+16	11	143	0.0769231
R-HSA-1430728	Metabolism	32	3519	0.00909349	1.17789e+16	2.00241e+16	62	2145	0.0289044
R-HSA-168249	Innate Immune System	12	1528	0.0078534	2.49877e+16	3.14887e+16	9	702	0.0128205
R-HSA-199991	Membrane Trafficking	5	658	0.00759878	3.98712e+16	3.98712e+16	20	218	0.0917431
R-HSA-392499	Metabolism of proteins	14	1857	0.00753904	2739448006525522	3.14887e+16	25	670	0.0373134
R-HSA-597592	Post-translational protein modification	8	1191	0.00671704	4.77221e+16	4.77221e+16	17	390	0.0435897
R-HSA-109582	Hemostasis	5	796	0.00628141	5660434604992964	5660434604992964	7	322	0.0217391
R-HSA-168256	Immune System	16	2591	0.00617522	5762900903987238	5762900903987238	33	1284	0.0257009
R-HSA-5653656	Vesicle-mediated transport	5	819	0.00610501	5918102684095463	5918102684095463	20	250	0.08
R-HSA-1643685	Disease	5	1487	0.00336247	9641279669823972	9641279669823972	11	896	0.0122768
R-HSA-1059683	Interleukin-6 signaling	3	16	0	1.52143e+12	1.5381e+16	15	19	0.789474
R-HSA-6783589	Interleukin-6 family signaling	3	32	0	1.13229e+16	4982070304934583	21	36	0.583333
R-HSA-2046106	alpha-linolenic acid (ALA) metabolism	3	45	0	2969873138128909	9206606728199618	4	15	0.266667
R-HSA-70263	Gluconeogenesis	4	65	0	7.92289e+11	4357589360826586	3	21	0.142857
R-HSA-2046104	alpha-linolenic (omega3) and linoleic (omega6) acid metabolism	3	55	0	5184458872913078	1.38298e+16	5	25	0.2
R-HSA-70171	Glycolysis	3	59	0	6286253783686413	1.38298e+16	2	12	0.166667
R-HSA-1268020	Mitochondrial protein import	3	65	0	8183185778793844	1555789043326372	2	13	0.153846
R-HSA-1660662	Glycosphingolipid metabolism	3	86	0	1.726e+16	2406002082885771	4	31	0.129032
R-HSA-428157	Sphingolipid metabolism	4	154	0	1.64215e+16	2406002082885771	6	60	0.1
R-HSA-1989781	PPARA activates gene expression	4	177	0	2.57441e+16	2.57441e+16	2	42	0.047619
R-HSA-400206	Regulation of lipid metabolism by Peroxisome proliferator-activated receptor alpha (PPARalpha)	4	180	0	2.7153e+16	2.63711e+16	2	45	0.0444444
R-HSA-114608	Platelet degranulation	3	137	0	5572271951656382	3.04849e+16	3	11	0.272727
R-HSA-76005	Response to elevated platelet cytosolic Ca2+	3	144	0	6275785401367118	3.0495e+16	3	14	0.214286
R-HSA-6811442	Intra-Golgi and retrograde Golgi-to-ER traffic	3	211	0	1478181129071836	3.0495e+16	8	48	0.166667
R-HSA-76002	Platelet activation, signaling and aggregation	4	305	0	1.2615e+16	3.0495e+16	4	114	0.0350877
R-HSA-1483257	Phospholipid metabolism	3	312	0	3128905289112478	3.14887e+16	10	204	0.0490196
R-HSA-71291	Metabolism of amino acids and derivatives	3	635	0	7681676361441598	7681676361441598	4	247	0.0161943
R-HSA-449147	Signaling by Interleukins	3	662	0	7923578681488124	7923578681488124	21	281	0.0747331
R-HSA-382551	Transmembrane transport of small molecules	4	890	0	8188714397574424	8188714397574424	9	320	0.028125
R-HSA-1280215	Cytokine Signaling in Immune system	3	979	0	950905115761791	950905115761791	21	413	0.0508475
R-HSA-74160	Gene Expression	4	2124	0	9996294391386874	9996294391386874	8	782	0.0102302
R-HSA-162582	Signal Transduction	4	2905	0	9999974772355952	9999974772355952	10	1836	0.00544662
R-HSA-5619107	Defective TRP may confer susceptibility towards thyroid papillary carcinoma (TPC)	1	3	0	1869032953058647	2406002082885771	1	1	1
R-HSA-5619056	Defective HK1 causes hexokinase deficiency (HK deficiency)	1	3	0	1869032953058647	2406002082885771	1	1	1
R-HSA-180897	Vpr-mediated induction of apoptosis by mitochondrial outer membrane permeabilization	1	4	0	2.48434e+16	2.57441e+16	1	2	0.5
R-HSA-5357609	Glycogen storage disease type II (GAA)	1	5	0	309584098000224	2.63711e+16	2	2	1
R-HSA-5357572	Lysosomal glycogen catabolism	1	6	0	3.70355e+16	2962840956171897	2	2	1
R-HSA-182218	Nef Mediated CD8 Down-regulation	1	8	0	4907699922123088	3.04849e+16	3	3	1
R-HSA-8857538	PTK6 promotes HIF1A stabilization	1	9	0	5.50418e+16	3.04849e+16	5	5	1
R-HSA-159763	Transport of gamma-carboxylated protein precursors from the endoplasmic reticulum to the Golgi apparatus	1	9	0	5.50418e+16	3.04849e+16	1	9	0.111111
R-HSA-167590	Nef Mediated CD4 Down-regulation	1	10	0	6.09697e+16	3.04849e+16	3	5	0.6
R-HSA-159782	Removal of aminoterminal propeptides from gamma-carboxylated proteins	1	10	0	6.09697e+16	3.04849e+16	1	9	0.111111
R-HSA-2022857	Keratan sulfate degradation	2	22	0	864327246292429	1555789043326372	1	6	0.166667
R-HSA-2993913	Clearance of Nuclear Envelope Membranes from Chromatin	1	12	0	7271550780803027	3.0495e+16	1	1	1
R-HSA-112411	MAPK1 (ERK2) activation	1	12	0	7271550780803027	3.0495e+16	1	3	0.333333
R-HSA-426048	Arachidonate production from DAG	1	13	0	7853385560163906	3.0495e+16	1	3	0.333333
R-HSA-110056	MAPK3 (ERK1) activation	1	13	0	7853385560163906	3.0495e+16	1	4	0.25
R-HSA-159740	Gamma-carboxylation of protein precursors	1	15	0	9006257579384525	3.0495e+16	1	9	0.111111
R-HSA-2995410	Nuclear Envelope Reassembly	1	16	0	9577338847869744	3.0495e+16	1	3	0.333333
R-HSA-2995383	Initiation of Nuclear Envelope Reformation	1	16	0	9577338847869744	3.0495e+16	1	3	0.333333
R-HSA-879415	Advanced glycosylation endproduct receptor signaling	1	16	0	9577338847869744	3.0495e+16	1	4	0.25
R-HSA-159854	Gamma-carboxylation, transport, and amino-terminal cleavage of proteins	1	16	0	9577338847869744	3.0495e+16	3	27	0.111111
R-HSA-389887	Beta-oxidation of pristanoyl-CoA	2	35	0	2.07578e+16	2406002082885771	3	12	0.25
R-HSA-2032785	YAP1- and WWTR1 (TAZ)-stimulated gene expression	2	36	0	2.18727e+16	2406002082885771	1	9	0.111111
R-HSA-6788467	IL-6-type cytokine receptor ligand interactions	1	20	0	1.18265e+16	3.0495e+16	6	17	0.352941
R-HSA-6798163	Choline catabolism	1	21	0	1.23801e+16	3.0495e+16	1	8	0.125
R-HSA-2024096	HS-GAG degradation	2	44	0	3164154967933275	2.63711e+16	1	14	0.0714286
R-HSA-164938	Nef-mediates down modulation of cell surface receptors by recruiting them to clathrin adapters	1	22	0	1.29302e+16	3.0495e+16	6	15	0.4
R-HSA-139853	Elevation of cytosolic Ca2+ levels	1	22	0	1.29302e+16	3.0495e+16	1	5	0.2
R-HSA-3229121	Glycogen storage diseases	1	22	0	1.29302e+16	3.0495e+16	2	11	0.181818
R-HSA-71403	Citric acid cycle (TCA cycle)	2	45	0	3296385438811922	2.63711e+16	3	14	0.214286
R-HSA-4419969	Depolymerisation of the Nuclear Lamina	1	23	0	1.3477e+16	3.0495e+16	1	6	0.166667
R-HSA-8849932	SALM protein interactions at the synapses	1	23	0	1.3477e+16	3.0495e+16	1	8	0.125
R-HSA-6811438	Intra-Golgi traffic	2	48	0	3705802194160923	2.96464e+16	2	10	0.2
R-HSA-390247	Beta-oxidation of very long chain fatty acids	1	24	0	1.40203e+16	3.0495e+16	2	8	0.25
R-HSA-5620916	VxPx cargo-targeting to cilium	1	25	0	1.45603e+16	3.0495e+16	1	10	0.1
R-HSA-1638074	Keratan sulfate/keratin metabolism	2	52	0	4280233332098948	2996163332469264	1	15	0.0666667
R-HSA-200425	Import of palmitoyl-CoA into the mitochondrial matrix	1	26	0	1.50969e+16	3.0495e+16	1	7	0.142857
R-HSA-1237044	Erythrocytes take up carbon dioxide and release oxygen	1	26	0	1.50969e+16	3.0495e+16	1	7	0.142857
R-HSA-70221	Glycogen breakdown (glycogenolysis)	1	26	0	1.50969e+16	3.0495e+16	2	16	0.125
R-HSA-2022377	Metabolism of Angiotensinogen to Angiotensins	1	26	0	1.50969e+16	3.0495e+16	2	17	0.117647
R-HSA-210745	Regulation of gene expression in beta cells	1	26	0	1.50969e+16	3.0495e+16	1	12	0.0833333
R-HSA-1480926	O2/CO2 exchange in erythrocytes	1	26	0	1.50969e+16	3.0495e+16	1	13	0.0769231
R-HSA-975578	Reactions specific to the complex N-glycan synthesis pathway	1	27	0	1563025276439186	3126050552878372	1	7	0.142857
R-HSA-77387	Insulin receptor recycling	1	28	0	1.61602e+16	3.14887e+16	2	6	0.333333
R-HSA-112409	RAF-independent MAPK1/3 activation	1	28	0	1.61602e+16	3.14887e+16	2	12	0.166667
R-HSA-164952	The role of Nef in HIV-1 replication and disease pathogenesis	1	29	0	1.6687e+16	3.14887e+16	6	20	0.3
R-HSA-1660516	Synthesis of PIPs at the early endosome membrane	1	29	0	1.6687e+16	3.14887e+16	1	9	0.111111
R-HSA-70153	Glucose transport	2	59	0	5.35864e+16	3.04849e+16	6	19	0.315789
R-HSA-171052	LDL-mediated lipid transport	1	30	0	1.72104e+16	3.14887e+16	1	22	0.0454545
R-HSA-1482801	Acyl chain remodelling of PS	1	31	0	1.77306e+16	3.14887e+16	2	8	0.25
R-HSA-2046105	Linoleic acid (LA) metabolism	1	32	0	1824754146417965	3.14887e+16	1	10	0.1
R-HSA-1660514	Synthesis of PIPs at the Golgi membrane	1	32	0	1824754146417965	3.14887e+16	1	11	0.0909091
R-HSA-418360	Platelet calcium homeostasis	1	35	0	1.97792e+16	3.14887e+16	1	8	0.125
R-HSA-189200	Hexose transport	2	71	0	7399547563872644	3.0495e+16	6	24	0.25
R-HSA-917977	Transferrin endocytosis and recycling	1	37	0	2.07846e+16	3.14887e+16	2	9	0.222222
R-HSA-193368	Synthesis of bile acids and bile salts via 7alpha-hydroxycholesterol	2	76	0	8312726575421792	3.0495e+16	6	39	0.153846
R-HSA-170822	Regulation of Glucokinase by Glucokinase Regulatory Protein	1	38	0	2128259563008411	3.14887e+16	5	5	1
R-HSA-186712	Regulation of beta-cell development	1	38	0	2128259563008411	3.14887e+16	1	26	0.0384615
R-HSA-390522	Striated Muscle Contraction	1	40	0	2.22693e+16	3.14887e+16	4	4	1
R-HSA-1482788	Acyl chain remodelling of PC	1	40	0	2.22693e+16	3.14887e+16	2	9	0.222222
R-HSA-114508	Effects of PIP2 hydrolysis	1	40	0	2.22693e+16	3.14887e+16	1	9	0.111111
R-HSA-1482839	Acyl chain remodelling of PE	1	42	0	2.32439e+16	3.14887e+16	2	9	0.222222
R-HSA-71406	Pyruvate metabolism and Citric Acid (TCA) cycle	2	87	0	1.04321e+16	3.0495e+16	3	29	0.103448
R-HSA-1638091	Heparan sulfate/heparin (HS-GAG) metabolism	2	88	0	1.06316e+16	3.0495e+16	1	32	0.03125
R-HSA-196757	Metabolism of folate and pterines	1	44	0	2.42063e+16	3.14887e+16	1	29	0.0344828
R-HSA-176033	Interactions of Vpr with host cellular proteins	1	45	0	2.4683e+16	3.14887e+16	1	4	0.25
R-HSA-975576	N-glycan antennae elongation in the medial/trans-Golgi	1	45	0	2.4683e+16	3.14887e+16	1	14	0.0714286
R-HSA-390918	Peroxisomal lipid metabolism	2	94	0	1.18494e+16	3.0495e+16	5	40	0.125
R-HSA-8854214	TBC/RABGAPs	1	49	0	2.65606e+16	3.14887e+16	2	14	0.142857
R-HSA-350562	Regulation of ornithine decarboxylase (ODC)	1	52	0	279383068929573	3.14887e+16	1	4	0.25
R-HSA-1222556	ROS, RNS production in phagocytes	1	52	0	279383068929573	3.14887e+16	1	13	0.0769231
R-HSA-75876	Synthesis of very long-chain fatty acyl-CoAs	1	54	0	2884258125449579	3.14887e+16	1	14	0.0714286
R-HSA-192105	Synthesis of bile acids and bile salts	2	110	0	1.52475e+16	3.0495e+16	6	83	0.0722892
R-HSA-5620920	Cargo trafficking to the periciliary membrane	1	55	0	2.92905e+16	3.14887e+16	1	27	0.037037
R-HSA-532668	N-glycan trimming in the ER and Calnexin/Calreticulin cycle	1	57	0	3017801565673838	3.14887e+16	2	18	0.111111
R-HSA-194068	Bile acid and bile salt metabolism	2	120	0	1.74583e+16	3.14887e+16	6	94	0.0638298
R-HSA-4085001	Sialic acid metabolism	1	60	0	3.14887e+16	3.14887e+16	1	20	0.05
R-HSA-917937	Iron uptake and transport	1	62	0	3.23489e+16	3.23489e+16	2	24	0.0833333
R-HSA-1221632	Meiotic synapsis	1	63	0	3277505036002608	3277505036002608	6	6	1
R-HSA-2980766	Nuclear Envelope Breakdown	1	63	0	3277505036002608	3277505036002608	2	13	0.153846
R-HSA-5578775	Ion homeostasis	1	64	0	3319851320525893	3319851320525893	1	15	0.0666667
R-HSA-1660499	Synthesis of PIPs at the plasma membrane	1	65	0	3361934090447819	3361934090447819	1	25	0.04
R-HSA-3299685	Detoxification of Reactive Oxygen Species	1	65	0	3361934090447819	3361934090447819	1	33	0.030303
R-HSA-8873719	RAB geranylgeranylation	1	68	0	3.48662e+16	3.48662e+16	2	5	0.4
R-HSA-1442490	Collagen degradation	1	69	0	3.52766e+16	3.52766e+16	4	34	0.117647
R-HSA-163841	Gamma carboxylation, hypusine formation and arylsulfatase activation	1	69	0	3.52766e+16	3.52766e+16	3	39	0.0769231
R-HSA-70895	Branched-chain amino acid catabolism	1	69	0	3.52766e+16	3.52766e+16	1	26	0.0384615
R-HSA-75109	Triglyceride Biosynthesis	2	142	0	2.24718e+16	3.14887e+16	2	39	0.0512821
R-HSA-936837	Ion transport by P-type ATPases	1	71	0	3608986921163664	3608986921163664	1	14	0.0714286
R-HSA-162909	Host Interactions of HIV factors	2	148	0	2.38609e+16	3.14887e+16	7	54	0.12963
R-HSA-6790901	rRNA modification in the nucleus and cytosol	1	74	0	3729084894432887	3729084894432887	1	8	0.125
R-HSA-5619102	SLC transporter disorders	2	149	0	2.40929e+16	3.14887e+16	2	65	0.0307692
R-HSA-70614	Amino acid synthesis and interconversion (transamination)	1	75	0	3768619998443409	3768619998443409	2	29	0.0689655
R-HSA-1660661	Sphingolipid de novo biosynthesis	1	76	0	3.80791e+16	3.80791e+16	2	29	0.0689655
R-HSA-6794362	Protein-protein interactions at synapses	1	76	0	3.80791e+16	3.80791e+16	1	27	0.037037
R-HSA-8848021	Signaling by PTK6	1	80	0	3962632238419376	3962632238419376	5	52	0.0961538
R-HSA-5663084	Diseases of carbohydrate metabolism	1	80	0	3962632238419376	3962632238419376	2	34	0.0588235
R-HSA-199992	trans-Golgi Network Vesicle Budding	1	80	0	3962632238419376	3962632238419376	1	19	0.0526316
R-HSA-421837	Clathrin derived vesicle budding	1	80	0	3962632238419376	3962632238419376	1	19	0.0526316
R-HSA-1236977	Endosomal/Vacuolar pathway	1	82	0	4.03856e+16	4.03856e+16	1	4	0.25
R-HSA-977225	Amyloid fiber formation	1	82	0	4.03856e+16	4.03856e+16	1	28	0.0357143
R-HSA-1445148	Translocation of GLUT4 to the plasma membrane	1	87	0	4.22426e+16	4.22426e+16	2	15	0.133333
R-HSA-1630316	Glycosaminoglycan metabolism	2	183	0	3198941089401617	3198941089401617	2	82	0.0243902
R-HSA-1500620	Meiosis	1	94	0	4474686486998395	4474686486998395	6	14	0.428571
R-HSA-8876198	RAB GEFs exchange GTP for GDP on RABs	1	94	0	4474686486998395	4474686486998395	1	21	0.047619
R-HSA-174824	Lipoprotein metabolism	1	96	0	4.54425e+16	4.54425e+16	1	84	0.0119048
R-HSA-6807878	COPI-mediated anterograde transport	1	100	0	4.68078e+16	4.68078e+16	6	12	0.5
R-HSA-75105	Fatty Acyl-CoA Biosynthesis	1	101	0	4.71438e+16	4.71438e+16	1	29	0.0344828
R-HSA-381038	XBP1(S) activates chaperone genes	1	102	0	4.74777e+16	4.74777e+16	1	46	0.0217391
R-HSA-422356	Regulation of insulin secretion	1	104	0	4.81393e+16	4.81393e+16	1	37	0.027027
R-HSA-1483255	PI Metabolism	1	105	0	4.8467e+16	4.8467e+16	3	73	0.0410959
R-HSA-948021	Transport to the Golgi and subsequent modification	2	212	0	3858251430812635	3858251430812635	7	60	0.116667
R-HSA-6811434	COPI-dependent Golgi-to-ER retrograde traffic	1	106	0	4.87927e+16	4.87927e+16	6	11	0.545455
R-HSA-381070	IRE1alpha activates chaperones	1	106	0	4.87927e+16	4.87927e+16	1	52	0.0192308
R-HSA-397014	Muscle contraction	2	214	0	3.90281e+16	3.90281e+16	5	39	0.128205
R-HSA-1428517	The citric acid (TCA) cycle and respiratory electron transport	2	218	0	3.99151e+16	3.99151e+16	3	58	0.0517241
R-HSA-1483206	Glycerophospholipid biosynthesis	2	225	0	4145316927344853	4145316927344853	7	135	0.0518519
R-HSA-983712	Ion channel transport	2	236	0	4383077537943558	4383077537943558	2	43	0.0465116
R-HSA-418346	Platelet homeostasis	1	118	0	5254566243500595	5254566243500595	2	30	0.0666667
R-HSA-1799339	SRP-dependent cotranslational protein targeting to membrane	1	120	0	5314417105274377	5314417105274377	2	5	0.4
R-HSA-5619115	Disorders of transmembrane transporters	2	245	0	4573761732679047	4573761732679047	2	87	0.0229885
R-HSA-2980736	Peptide hormone metabolism	1	126	0	5489531696288505	5489531696288505	2	53	0.0377358
R-HSA-162906	HIV Infection	2	253	0	4.74017e+16	4.74017e+16	7	155	0.0451613
R-HSA-446219	Synthesis of substrates in N-glycan biosythesis	1	131	0	563050978309878	563050978309878	1	48	0.0208333
R-HSA-68875	Mitotic Prophase	1	132	0	5658178573161436	5658178573161436	2	33	0.0606061
R-HSA-8856688	Golgi-to-ER retrograde transport	1	141	0	5899535923387931	5899535923387931	6	18	0.333333
R-HSA-2132295	MHC class II antigen presentation	1	142	0	5925521233917974	5925521233917974	1	24	0.0416667
R-HSA-163685	Integration of energy metabolism	1	143	0	5951343866921724	5951343866921724	1	65	0.0153846
R-HSA-351202	Metabolism of polyamines	1	144	0	5977004828324588	5977004828324588	1	38	0.0263158
R-HSA-1474228	Degradation of the extracellular matrix	1	146	0	6027845729351411	6027845729351411	12	103	0.116505
R-HSA-381119	Unfolded Protein Response (UPR)	1	149	0	6102919340776833	6102919340776833	1	72	0.0138889
R-HSA-5576891	Cardiac conduction	1	151	0	6152187970325345	6152187970325345	1	26	0.0384615
R-HSA-199977	ER to Golgi Anterograde Transport	1	157	0	6296331886856751	6296331886856751	6	39	0.153846
R-HSA-73923	Lipid digestion, mobilization, and transport	1	157	0	6296331886856751	6296331886856751	1	118	0.00847458
R-HSA-446193	Biosynthesis of the N-glycan precursor (dolichol lipid-linked oligosaccharide, LLO) and transfer to a nascent protein	1	159	0	6343184202498258	6343184202498258	1	62	0.016129
R-HSA-6791226	Major pathway of rRNA processing in the nucleolus and cytosol	1	176	0	6718502477574544	6718502477574544	4	7	0.571429
R-HSA-72766	Translation	1	178	0	6760075158214054	6760075158214054	2	40	0.05
R-HSA-1236975	Antigen processing-Cross presentation	1	186	0	6921226479831503	6921226479831503	1	22	0.0454545
R-HSA-211897	Cytochrome P450 - arranged by substrate type	1	186	0	6921226479831503	6921226479831503	1	62	0.016129
R-HSA-8868773	rRNA processing in the nucleus and cytosol	1	200	0	7184409756505954	7184409756505954	5	15	0.333333
R-HSA-68882	Mitotic Anaphase	1	202	0	7220146198134775	7220146198134775	1	11	0.0909091
R-HSA-2555396	Mitotic Metaphase and Anaphase	1	203	0	7237846026476862	7237846026476862	1	12	0.0833333
R-HSA-5689880	Ub-specific processing proteases	1	206	0	7290280280405597	7290280280405597	1	40	0.025
R-HSA-5617833	Cilium Assembly	1	207	0	7307538912863332	7307538912863332	1	50	0.02
R-HSA-5668914	Diseases of metabolism	1	217	0	7474262737570041	7474262737570041	2	95	0.0210526
R-HSA-425407	SLC-mediated transmembrane transport	2	456	0	7855557146802977	7855557146802977	6	193	0.0310881
R-HSA-72312	rRNA processing	1	239	0	780599755603799	780599755603799	5	21	0.238095
R-HSA-416476	G alpha (q) signalling events	1	240	0	7820007413704484	7820007413704484	1	20	0.05
R-HSA-196849	Metabolism of water-soluble vitamins and cofactors	1	248	0	7928950561950552	7928950561950552	1	138	0.00724638
R-HSA-202733	Cell surface interactions at the vascular wall	1	257	0	8045092571121347	8045092571121347	1	64	0.015625
R-HSA-5663205	Infectious disease	2	529	0	8503013802772759	8503013802772759	7	325	0.0215385
R-HSA-5684996	MAPK1/MAPK3 signaling	1	274	0	8247191812311448	8247191812311448	2	46	0.0434783
R-HSA-5688426	Deubiquitination	1	286	0	8377280918906302	8377280918906302	1	76	0.0131579
R-HSA-211945	Phase 1 - Functionalization of compounds	1	300	0	8517036023456406	8517036023456406	1	99	0.010101
R-HSA-983168	Antigen processing: Ubiquitination & Proteasome degradation	1	312	0	8627314108880119	8627314108880119	1	8	0.125
R-HSA-68886	M Phase	1	319	0	868785986321676	868785986321676	3	63	0.047619
R-HSA-1474244	Extracellular matrix organization	1	321	0	8704668800965141	8704668800965141	12	314	0.0382166
R-HSA-1640170	Cell Cycle	2	645	0	9177719609613760	9177719609613760	9	383	0.0234987
R-HSA-5683057	MAPK family signaling cascades	1	324	0	8729484161441696	8729484161441696	2	86	0.0232558
R-HSA-196854	Metabolism of vitamins and cofactors	1	335	0	8816521438365068	8816521438365068	1	181	0.00552486
R-HSA-74752	Signaling by Insulin receptor	1	347	0	8904762085250508	8904762085250508	2	99	0.020202
R-HSA-112316	Neuronal System	1	410	0	9271696744789216	9271696744789216	1	151	0.00662252
R-HSA-1852241	Organelle biogenesis and maintenance	1	428	0	9352078493487928	9352078493487928	1	96	0.0104167
R-HSA-983169	Class I MHC mediated antigen processing & presentation	1	461	0	947734018591428	947734018591428	2	45	0.0444444
R-HSA-881907	Gastrin-CREB signalling pathway via PKC and MAPK	1	504	0	9605293617319886	9605293617319886	1	68	0.0147059
R-HSA-212436	Generic Transcription Pathway	2	1042	0	9912137984691960	9912137984691960	1	353	0.00283286
R-HSA-2262752	Cellular responses to stress	1	525	0	9655992802690764	9655992802690764	1	207	0.00483092
R-HSA-69278	Cell Cycle, Mitotic	1	533	0	9673565694705046	9673565694705046	3	294	0.0102041
R-HSA-1280218	Adaptive Immune System	2	1076	0	9928207902381260	9928207902381260	3	271	0.0110701
R-HSA-211859	Biological oxidations	1	540	0	9688212591554308	9688212591554308	1	185	0.00540541
R-HSA-388396	GPCR downstream signaling	1	1137	0	999436277900706	999436277900706	1	64	0.015625
R-HSA-1266738	Developmental Biology	1	1159	0	9995156233850796	9995156233850796	1	472	0.00211864
R-HSA-372790	Signaling by GPCR	1	1504	0	9999567717364752	9999567717364752	1	326	0.00306748

## Sheet: Cluster_2_trans up
Pathway identifier	Pathway name	#Entities found	#Entities total	Entities ratio	Entities pValue	Entities FDR	#Reactions found	#Reactions total	Reactions ratio	Species identifier	Species name	Submitted entities found	Mapped entities	Found reaction identifiers
R-HSA-397014	Muscle contraction	3	214	0.0140187	8666299980638836	1.18492e+16	8	39	3816420393384871	9606	Homo sapiens	Pxn;Tnni2;Sorbs3		R-HSA-390597;R-HSA-445700;R-HSA-390598;R-HSA-390593;R-HSA-445699;R-HSA-390595;R-HSA-445704;R-HSA-445705
R-HSA-73894	DNA Repair	3	346	0.00867052	3.08105e+16	1.27103e+16	38	305	2984636461493297	9606	Homo sapiens	Tp53bp1;Apex1;Kpna2		R-HSA-5683735;R-HSA-5684052;R-HSA-69891;R-HSA-5649873;R-HSA-5693599;R-HSA-5686685;R-HSA-5651805;R-HSA-110349;R-HSA-110351;R-HSA-5683801;R-HSA-110350;R-HSA-110353;R-HSA-110352;R-HSA-110355;R-HSA-110354;R-HSA-111253;R-HSA-110356;R-HSA-5649856;R-HSA-110359;R-HSA-110360;R-HSA-110363;R-HSA-5683405;R-HSA-110364;R-HSA-110368;R-HSA-5686900;R-HSA-110371;R-HSA-5686704;R-HSA-110375;R-HSA-5693566;R-HSA-56498…
R-HSA-597592	Post-translational protein modification	3	1191	0.00251889	4.28307e+16	4.28307e+16	4	390	3.81642e+16	9606	Homo sapiens	Rab30;Smad3;Tp53bp1		R-HSA-8870469;R-HSA-6781764;R-HSA-8870466;R-HSA-2997723
R-HSA-392499	Metabolism of proteins	4	1857	0.00215401	517675128678287	517675128678287	5	670	6556414521968881	9606	Homo sapiens	Rab30;Smad3;Tes;Tp53bp1		R-HSA-8870469;R-HSA-6781764;R-HSA-8870466;R-HSA-5683888;R-HSA-2997723
R-HSA-162582	Signal Transduction	4	2905	0.00137694	8625364724959503	8625364724959503	57	1836	1796653292885801	9606	Homo sapiens	Syde2;Smad3;Pxn;Ppp1r12b		R-HSA-177923;R-HSA-5668947;R-HSA-2187303;R-HSA-870538;R-HSA-5671772;R-HSA-2187309;R-HSA-419083;R-HSA-209055;R-HSA-2187325;R-HSA-2187395;R-HSA-419232;R-HSA-2187401;R-HSA-173481;R-HSA-2187405;R-HSA-1225919;R-HSA-173488;R-HSA-2186643;R-HSA-5218811;R-HSA-5218809;R-HSA-2127257;R-HSA-870449;R-HSA-2187293;R-HSA-1549526;R-HSA-5218822;R-HSA-2187368;R-HSA-2176491;R-HSA-2187375;R-HSA-2186607;R-HSA-170835;R-…
R-HSA-1430728	Metabolism	3	3519	0.000852515	9845493241482428	9845493241482428	2	2145	2.09903e+16	9606	Homo sapiens	Ddah2;Plin2		R-HSA-1989770;R-HSA-5693373
R-HSA-445355	Smooth Muscle Contraction	2	37	0	2500636022106484	1.18492e+16	4	9	8.80712e+11	9606	Homo sapiens	Pxn;Sorbs3		R-HSA-445700;R-HSA-445699;R-HSA-445704;R-HSA-445705
R-HSA-5693606	DNA Double Strand Break Response	2	74	0	956095409032176	1.18492e+16	11	44	4305705059203444	9606	Homo sapiens	Tp53bp1;Kpna2		R-HSA-5684006;R-HSA-5683735;R-HSA-69891;R-HSA-5683425;R-HSA-5693566;R-HSA-5693551;R-HSA-5683405;R-HSA-5683384;R-HSA-5684008;R-HSA-5683801;R-HSA-5683385
R-HSA-5693532	DNA Double-Strand Break Repair	2	167	0	4.35024e+16	1.27103e+16	17	107	1.04707e+16	9606	Homo sapiens	Tp53bp1;Kpna2		R-HSA-5683735;R-HSA-5684052;R-HSA-5686900;R-HSA-69891;R-HSA-5686704;R-HSA-5693566;R-HSA-5693599;R-HSA-5686685;R-HSA-5683384;R-HSA-5683801;R-HSA-5683385;R-HSA-5684006;R-HSA-5684071;R-HSA-5683425;R-HSA-5693551;R-HSA-5683405;R-HSA-5684008
R-HSA-1989781	PPARA activates gene expression	2	177	0	4.82827e+16	1.27103e+16	1	42	4109991192876015	9606	Homo sapiens	Plin2		R-HSA-1989770
R-HSA-400206	Regulation of lipid metabolism by Peroxisome proliferator-activated receptor alpha (PPARalpha)	2	180	0	4975317446401828	1.27103e+16	1	45	4403561992367159	9606	Homo sapiens	Plin2		R-HSA-1989770
R-HSA-535734	Fatty acid, triacylglycerol, and ketone body metabolism	2	430	0	2.11041e+16	2.11041e+16	1	151	1.47764e+16	9606	Homo sapiens	Plin2		R-HSA-1989770
R-HSA-194315	Signaling by Rho GTPases	2	438	0	2.16932e+16	2.16932e+16	5	108	1.05685e+16	9606	Homo sapiens	Syde2;Ppp1r12b		R-HSA-5668947;R-HSA-419232;R-HSA-194922;R-HSA-5671772;R-HSA-419083
R-HSA-1640170	Cell Cycle	2	645	0	3707722288767181	3707722288767181	3	383	3747920540170271	9606	Homo sapiens	Tp53bp1;Ppp1r12b		R-HSA-5683735;R-HSA-69891;R-HSA-3002811
R-HSA-556833	Metabolism of lipids and lipoproteins	2	1402	0	7853177085226779	7853177085226779	1	898	8787552598101575	9606	Homo sapiens	Plin2		R-HSA-1989770
R-HSA-1643685	Disease	2	1487	0	8133682947178312	8133682947178312	10	896	8767981211468832	9606	Homo sapiens	Smad3;Kpna2		R-HSA-3713560;R-HSA-3702184;R-HSA-3702153;R-HSA-3702186;R-HSA-3311014;R-HSA-3304394;R-HSA-3315483;R-HSA-1176059;R-HSA-3656523;R-HSA-6791035
R-HSA-74160	Gene Expression	2	2124	0	940456413610879	940456413610879	31	782	7652412173402486	9606	Homo sapiens	Gprc5a;Smad3		R-HSA-2187303;R-HSA-870538;R-HSA-2176491;R-HSA-2187309;R-HSA-2186607;R-HSA-2186741;R-HSA-1484099;R-HSA-2176503;R-HSA-2176502;R-HSA-2186747;R-HSA-209055;R-HSA-2187325;R-HSA-2187388;R-HSA-170847;R-HSA-2187395;R-HSA-2187330;R-HSA-2031355;R-HSA-450595;R-HSA-173481;R-HSA-173545;R-HSA-2179274;R-HSA-2179276;R-HSA-173488;R-HSA-2186643;R-HSA-2106579;R-HSA-2127257;R-HSA-2176475;R-HSA-2106586;R-HSA-870449;R…
R-HSA-168256	Immune System	2	2591	0	9765191304956128	9765191304956128	5	1284	1256483021822096	9606	Homo sapiens	Hectd1;Kpna2		R-HSA-983147;R-HSA-983157;R-HSA-1176059;R-HSA-983140;R-HSA-983156
R-HSA-73930	Abasic sugar-phosphate removal via the single-nucleotide replacement pathway	1	3	0	5964425036705245	1.18492e+16	2	2	1.95714e+11	9606	Homo sapiens	Apex1		R-HSA-110375;R-HSA-110360
R-HSA-3304347	Loss of Function of SMAD4 in Cancer	1	3	0	5964425036705245	1.18492e+16	1	1	9.78569e+10	9606	Homo sapiens	Smad3		R-HSA-3311014
R-HSA-3311021	SMAD4 MH2 Domain Mutants in Cancer	1	3	0	5964425036705245	1.18492e+16	1	1	9.78569e+10	9606	Homo sapiens	Smad3		R-HSA-3311014
R-HSA-446343	Localization of the PINCH-ILK-PARVIN complex to focal adhesions	1	4	0	7944954283299555	1.18492e+16	1	2	1.95714e+11	9606	Homo sapiens	Pxn		R-HSA-446322
R-HSA-3304356	SMAD2/3 Phosphorylation Motif Mutants in Cancer	1	7	0	1.38638e+16	1.18492e+16	2	2	1.95714e+11	9606	Homo sapiens	Smad3		R-HSA-3713560;R-HSA-3304394
R-HSA-110381	Resolution of AP sites via the single-nucleotide replacement pathway	1	7	0	1.38638e+16	1.18492e+16	2	6	5.87142e+11	9606	Homo sapiens	Apex1		R-HSA-110375;R-HSA-110360
R-HSA-446388	Regulation of cytoskeletal remodeling and cell spreading by IPP complex components	1	8	0	1.58292e+16	1.18492e+16	1	5	4.89285e+11	9606	Homo sapiens	Pxn		R-HSA-446322
R-HSA-110357	Displacement of DNA glycosylase by APEX1	1	9	0	1.77908e+16	1.18492e+16	8	8	7.82855e+11	9606	Homo sapiens	Apex1		R-HSA-110353;R-HSA-110352;R-HSA-110355;R-HSA-110354;R-HSA-110356;R-HSA-110349;R-HSA-110351;R-HSA-110350
R-HSA-3304349	Loss of Function of SMAD2/3 in Cancer	1	9	0	1.77908e+16	1.18492e+16	6	6	5.87142e+11	9606	Homo sapiens	Smad3		R-HSA-3713560;R-HSA-3702184;R-HSA-3702153;R-HSA-3702186;R-HSA-3304394;R-HSA-3315483
R-HSA-3315487	SMAD2/3 MH2 Domain Mutants in Cancer	1	9	0	1.77908e+16	1.18492e+16	4	4	3.91428e+11	9606	Homo sapiens	Smad3		R-HSA-3702184;R-HSA-3702153;R-HSA-3702186;R-HSA-3315483
R-HSA-3656532	TGFBR1 KD Mutants in Cancer	1	9	0	1.77908e+16	1.18492e+16	1	3	2.93571e+12	9606	Homo sapiens	Smad3		R-HSA-3656523
R-HSA-3656534	Loss of Function of TGFBR1 in Cancer	1	9	0	1.77908e+16	1.18492e+16	1	4	3.91428e+11	9606	Homo sapiens	Smad3		R-HSA-3656523
R-HSA-3304351	Signaling by TGF-beta Receptor Complex in Cancer	1	10	0	1974868802849028	1.18492e+16	8	15	1.46785e+16	9606	Homo sapiens	Smad3		R-HSA-3713560;R-HSA-3702184;R-HSA-3702153;R-HSA-3702186;R-HSA-3311014;R-HSA-3304394;R-HSA-3315483;R-HSA-3656523
R-HSA-450520	HuR (ELAVL1) binds and stabilizes mRNA	1	12	0	2.36532e+16	1.27103e+16	1	7	6.84999e+11	9606	Homo sapiens	Gprc5a		R-HSA-450595
R-HSA-110362	POLB-Dependent Long Patch Base Excision Repair	1	13	0	2559979764981124	1.27103e+16	1	9	8.80712e+11	9606	Homo sapiens	Apex1		R-HSA-5649873
R-HSA-1502540	Signaling by Activin	1	15	0	2948186503157102	1.27103e+16	4	10	9.78569e+11	9606	Homo sapiens	Smad3		R-HSA-1549526;R-HSA-173488;R-HSA-1225919;R-HSA-170847
R-HSA-5693548	Sensing of DNA Double Strand Breaks	1	15	0	2948186503157102	1.27103e+16	2	9	8.80712e+11	9606	Homo sapiens	Kpna2		R-HSA-5684006;R-HSA-5684008
R-HSA-3232118	SUMOylation of transcription factors	1	17	0	3334905861084303	1.27103e+16	1	9	8.80712e+11	9606	Homo sapiens	Tp53bp1		R-HSA-2997723
R-HSA-446353	Cell-extracellular matrix interactions	1	19	0	3.72014e+16	1.27103e+16	1	10	9.78569e+11	9606	Homo sapiens	Pxn		R-HSA-446322
R-HSA-5627117	RHO GTPases Activate ROCKs	1	22	0	4295232827594209	1.27103e+16	2	5	4.89285e+11	9606	Homo sapiens	Ppp1r12b		R-HSA-419232;R-HSA-419083
R-HSA-5651801	PCNA-Dependent Long Patch Base Excision Repair	1	23	0	4.48619e+16	1.27103e+16	6	6	5.87142e+11	9606	Homo sapiens	Apex1		R-HSA-110368;R-HSA-110371;R-HSA-5651809;R-HSA-110363;R-HSA-5651805;R-HSA-110364
R-HSA-1181150	Signaling by NODAL	1	23	0	4.48619e+16	1.27103e+16	5	12	1.17428e+16	9606	Homo sapiens	Smad3		R-HSA-173488;R-HSA-1535903;R-HSA-1181355;R-HSA-1225919;R-HSA-170847
R-HSA-2173795	Downregulation of SMAD2/3:SMAD4 transcriptional activity	1	27	0	5.24638e+16	1.27103e+16	17	21	2.055e+16	9606	Homo sapiens	Smad3		R-HSA-2187395;R-HSA-2187330;R-HSA-870538;R-HSA-2176491;R-HSA-173481;R-HSA-173545;R-HSA-2179274;R-HSA-2179276;R-HSA-2186607;R-HSA-2186741;R-HSA-2176503;R-HSA-2176502;R-HSA-2186747;R-HSA-209055;R-HSA-870449;R-HSA-2187325;R-HSA-2187388
R-HSA-5627123	RHO GTPases activate PAKs	1	27	0	5.24638e+16	1.27103e+16	2	13	1.27214e+16	9606	Homo sapiens	Ppp1r12b		R-HSA-5668947;R-HSA-419232
R-HSA-2173788	Downregulation of TGF-beta receptor signaling	1	28	0	5435518954725849	1.27103e+16	7	28	273999412858401	9606	Homo sapiens	Smad3		R-HSA-2187382;R-HSA-2187401;R-HSA-2187368;R-HSA-2187355;R-HSA-2187405;R-HSA-2187375;R-HSA-2187358
R-HSA-110373	Resolution of AP sites via the multiple-nucleotide patch replacement pathway	1	30	0	5812702853758911	1.27103e+16	10	18	1.76142e+16	9606	Homo sapiens	Apex1		R-HSA-110368;R-HSA-110371;R-HSA-111253;R-HSA-5649856;R-HSA-5649873;R-HSA-5651809;R-HSA-5649854;R-HSA-110363;R-HSA-5651805;R-HSA-110364
R-HSA-8849471	PTK6 Regulates RHO GTPases, RAS GTPase and MAP kinases	1	32	0	6188439942593715	1.27103e+16	4	13	1.27214e+16	9606	Homo sapiens	Pxn		R-HSA-8848596;R-HSA-8848611;R-HSA-8848606;R-HSA-8848618
R-HSA-203615	eNOS activation	1	35	0	6749344457751527	1.27103e+16	1	18	1.76142e+16	9606	Homo sapiens	Ddah2		R-HSA-5693373
R-HSA-2173789	TGF-beta receptor signaling activates SMADs	1	36	0	6935594985002136	1.27103e+16	11	39	3816420393384871	9606	Homo sapiens	Smad3		R-HSA-170850;R-HSA-170835;R-HSA-170868;R-HSA-2187382;R-HSA-2187401;R-HSA-2187368;R-HSA-2187355;R-HSA-2187405;R-HSA-170847;R-HSA-2187375;R-HSA-2187358
R-HSA-2173796	SMAD2/SMAD3:SMAD4 heterotrimer regulates transcription	1	39	0	7492202884381438	1.27103e+16	13	17	1663567863783149	9606	Homo sapiens	Smad3		R-HSA-2031355;R-HSA-2187303;R-HSA-2187309;R-HSA-173488;R-HSA-2186643;R-HSA-2106579;R-HSA-1484099;R-HSA-2127257;R-HSA-2176475;R-HSA-2106586;R-HSA-2187293;R-HSA-170847;R-HSA-2106591
R-HSA-390522	Striated Muscle Contraction	1	40	0	7677026484897709	1.27103e+16	4	4	3.91428e+11	9606	Homo sapiens	Tnni2		R-HSA-390597;R-HSA-390598;R-HSA-390593;R-HSA-390595
R-HSA-73933	Resolution of Abasic Sites (AP sites)	1	45	0	8595831242644869	1.27103e+16	21	42	4109991192876015	9606	Homo sapiens	Apex1		R-HSA-110368;R-HSA-110371;R-HSA-110375;R-HSA-5649873;R-HSA-5649854;R-HSA-5651805;R-HSA-110349;R-HSA-110351;R-HSA-110350;R-HSA-110353;R-HSA-110352;R-HSA-110355;R-HSA-110354;R-HSA-111253;R-HSA-110356;R-HSA-5649856;R-HSA-110359;R-HSA-5651809;R-HSA-110360;R-HSA-110363;R-HSA-110364
R-HSA-168276	NS1 Mediated Effects on Host Pathways	1	45	0	8595831242644869	1.27103e+16	2	6	5.87142e+11	9606	Homo sapiens	Kpna2		R-HSA-1176059;R-HSA-6791035
R-HSA-6811438	Intra-Golgi traffic	1	48	0	9142886976296694	1.27103e+16	1	10	9.78569e+11	9606	Homo sapiens	Rab30		R-HSA-8849748
R-HSA-168253	Host Interactions with Influenza Factors	1	49	0	9324538262552218	1.27103e+16	2	8	7.82855e+11	9606	Homo sapiens	Kpna2		R-HSA-1176059;R-HSA-6791035
R-HSA-5683826	Surfactant metabolism	1	52	0	9867399287089562	1.27103e+16	1	26	2544280262256581	9606	Homo sapiens	Tes		R-HSA-5683888
R-HSA-2173793	Transcriptional activity of SMAD2/SMAD3:SMAD4 heterotrimer	1	55	0	1.04071e+16	1.27103e+16	30	38	3.71856e+16	9606	Homo sapiens	Smad3		R-HSA-2187303;R-HSA-870538;R-HSA-2176491;R-HSA-2187309;R-HSA-2186607;R-HSA-2186741;R-HSA-1484099;R-HSA-2176503;R-HSA-2176502;R-HSA-2186747;R-HSA-209055;R-HSA-2187325;R-HSA-2187388;R-HSA-170847;R-HSA-2187395;R-HSA-2187330;R-HSA-2031355;R-HSA-173481;R-HSA-173545;R-HSA-2179274;R-HSA-2179276;R-HSA-173488;R-HSA-2186643;R-HSA-2106579;R-HSA-2127257;R-HSA-2176475;R-HSA-2106586;R-HSA-870449;R-HSA-2187293;…
R-HSA-5693571	Nonhomologous End-Joining (NHEJ)	1	57	0	1.07652e+16	1.27103e+16	4	13	1.27214e+16	9606	Homo sapiens	Tp53bp1		R-HSA-5686900;R-HSA-5686704;R-HSA-5693599;R-HSA-5686685
R-HSA-203765	eNOS activation and regulation	1	58	0	1.09438e+16	1.27103e+16	1	38	3.71856e+16	9606	Homo sapiens	Ddah2		R-HSA-5693373
R-HSA-202131	Metabolism of nitric oxide	1	58	0	1.09438e+16	1.27103e+16	1	38	3.71856e+16	9606	Homo sapiens	Ddah2		R-HSA-5693373
R-HSA-73884	Base Excision Repair	1	59	0	1.11219e+16	1.27103e+16	21	86	841569625207946	9606	Homo sapiens	Apex1		R-HSA-110368;R-HSA-110371;R-HSA-110375;R-HSA-5649873;R-HSA-5649854;R-HSA-5651805;R-HSA-110349;R-HSA-110351;R-HSA-110350;R-HSA-110353;R-HSA-110352;R-HSA-110355;R-HSA-110354;R-HSA-111253;R-HSA-110356;R-HSA-5649856;R-HSA-110359;R-HSA-5651809;R-HSA-110360;R-HSA-110363;R-HSA-110364
R-HSA-5693565	Recruitment and ATM-mediated phosphorylation of repair and signaling proteins at DNA double strand breaks	1	66	0	1.23597e+16	1.27103e+16	9	35	3.42499e+16	9606	Homo sapiens	Tp53bp1		R-HSA-5683735;R-HSA-69891;R-HSA-5683425;R-HSA-5693566;R-HSA-5693551;R-HSA-5683405;R-HSA-5683384;R-HSA-5683801;R-HSA-5683385
R-HSA-8873719	RAB geranylgeranylation	1	68	0	1.27103e+16	1.27103e+16	2	5	4.89285e+11	9606	Homo sapiens	Rab30		R-HSA-8870469;R-HSA-8870466
R-HSA-5625740	RHO GTPases activate PKNs	1	79	0	1.46145e+16	1.46145e+16	2	20	1957138663274293	9606	Homo sapiens	Ppp1r12b		R-HSA-419232;R-HSA-5671772
R-HSA-8848021	Signaling by PTK6	1	80	0	1.47857e+16	1.47857e+16	4	52	5088560524513162	9606	Homo sapiens	Pxn		R-HSA-8848596;R-HSA-8848611;R-HSA-8848606;R-HSA-8848618
R-HSA-69473	G2/M DNA damage checkpoint	1	81	0	1.49565e+16	1.49565e+16	2	12	1.17428e+16	9606	Homo sapiens	Tp53bp1		R-HSA-5683735;R-HSA-69891
R-HSA-1169408	ISG15 antiviral mechanism	1	83	0	1529704695227141	1529704695227141	1	16	1.56571e+16	9606	Homo sapiens	Kpna2		R-HSA-1176059
R-HSA-1169410	Antiviral mechanism by IFN-stimulated genes	1	83	0	1529704695227141	1529704695227141	1	16	1.56571e+16	9606	Homo sapiens	Kpna2		R-HSA-1176059
R-HSA-170834	Signaling by TGF-beta Receptor Complex	1	84	0	1.54669e+16	1.54669e+16	40	82	8024268519424602	9606	Homo sapiens	Smad3		R-HSA-2187303;R-HSA-870538;R-HSA-2187368;R-HSA-2176491;R-HSA-2187309;R-HSA-2187375;R-HSA-2186607;R-HSA-170835;R-HSA-2186741;R-HSA-1484099;R-HSA-2176503;R-HSA-2187382;R-HSA-2176502;R-HSA-2186747;R-HSA-209055;R-HSA-2187325;R-HSA-2187388;R-HSA-170847;R-HSA-170850;R-HSA-2187395;R-HSA-2187330;R-HSA-2031355;R-HSA-2187401;R-HSA-173481;R-HSA-173545;R-HSA-2179274;R-HSA-2187405;R-HSA-2179276;R-HSA-173488;R…
R-HSA-5693607	Processing of DNA double-strand break ends	1	90	0	1.64788e+16	1.64788e+16	2	17	1663567863783149	9606	Homo sapiens	Tp53bp1		R-HSA-5684071;R-HSA-5684052
R-HSA-2565942	Regulation of PLK1 Activity at G2/M Transition	1	92	0	1.68136e+16	1.68136e+16	1	12	1.17428e+16	9606	Homo sapiens	Ppp1r12b		R-HSA-3002811
R-HSA-446728	Cell junction organization	1	92	0	1.68136e+16	1.68136e+16	1	35	3.42499e+16	9606	Homo sapiens	Pxn		R-HSA-446322
R-HSA-450531	Regulation of mRNA stability by proteins that bind AU-rich elements	1	93	0	1698043150435422	1698043150435422	1	26	2544280262256581	9606	Homo sapiens	Gprc5a		R-HSA-450595
R-HSA-3108232	SUMO E3 ligases SUMOylate target proteins	1	103	0	1.86316e+16	1.86316e+16	1	46	4501418925530874	9606	Homo sapiens	Tp53bp1		R-HSA-2997723
R-HSA-2990846	SUMOylation	1	112	0	2009065830483665	2009065830483665	1	55	5382131324004306	9606	Homo sapiens	Tp53bp1		R-HSA-2997723
R-HSA-5693567	HDR through Homologous Recombination (HR) or Single Strand Annealing (SSA)	1	124	0	2.1997e+16	2.1997e+16	2	42	4109991192876015	9606	Homo sapiens	Tp53bp1		R-HSA-5684071;R-HSA-5684052
R-HSA-5693538	Homology Directed Repair	1	130	0	2.29336e+16	2.29336e+16	2	50	4892846658185733	9606	Homo sapiens	Tp53bp1		R-HSA-5684071;R-HSA-5684052
R-HSA-194840	Rho GTPase cycle	1	144	0	2507732760672676	2507732760672676	1	5	4.89285e+11	9606	Homo sapiens	Syde2		R-HSA-194922
R-HSA-1500931	Cell-Cell communication	1	144	0	2507732760672676	2507732760672676	1	63	6164986789314023	9606	Homo sapiens	Pxn		R-HSA-446322
R-HSA-180292	GAB1 signalosome	1	152	0	2627643356374203	2627643356374203	1	46	4501418925530874	9606	Homo sapiens	Pxn		R-HSA-177923
R-HSA-69481	G2/M Checkpoints	1	154	0	2.65733e+16	2.65733e+16	2	24	2.34857e+16	9606	Homo sapiens	Tp53bp1		R-HSA-5683735;R-HSA-69891
R-HSA-69620	Cell Cycle Checkpoints	1	188	0	3144782119873818	3144782119873818	2	58	5.6757e+16	9606	Homo sapiens	Tp53bp1		R-HSA-5683735;R-HSA-69891
R-HSA-168254	Influenza Infection	1	195	0	3.2412e+16	3.2412e+16	2	60	5871415989822879	9606	Homo sapiens	Kpna2		R-HSA-1176059;R-HSA-6791035
R-HSA-69275	G2/M Transition	1	202	0	3336317769944376	3336317769944376	1	82	8024268519424602	9606	Homo sapiens	Ppp1r12b		R-HSA-3002811
R-HSA-453274	Mitotic G2-G2/M phases	1	204	0	3.36326e+16	3.36326e+16	1	84	821998238575203	9606	Homo sapiens	Ppp1r12b		R-HSA-3002811
R-HSA-5689880	Ub-specific processing proteases	1	206	0	3.39009e+16	3.39009e+16	1	40	3914277326548586	9606	Homo sapiens	Smad3		R-HSA-6781764
R-HSA-6811442	Intra-Golgi and retrograde Golgi-to-ER traffic	1	211	0	3.45672e+16	3.45672e+16	1	48	4.69713e+16	9606	Homo sapiens	Rab30		R-HSA-8849748
R-HSA-5688426	Deubiquitination	1	286	0	4.3819e+16	4.3819e+16	1	76	7437126920442313	9606	Homo sapiens	Smad3		R-HSA-6781764
R-HSA-913531	Interferon Signaling	1	291	0	4.43889e+16	4.43889e+16	1	50	4892846658185733	9606	Homo sapiens	Kpna2		R-HSA-1176059
R-HSA-195258	RHO GTPase Effectors	1	307	0	4617527250719815	4617527250719815	4	103	1.00793e+16	9606	Homo sapiens	Ppp1r12b		R-HSA-5668947;R-HSA-419232;R-HSA-5671772;R-HSA-419083
R-HSA-983168	Antigen processing: Ubiquitination & Proteasome degradation	1	312	0	4.67221e+16	4.67221e+16	4	8	7.82855e+11	9606	Homo sapiens	Hectd1		R-HSA-983147;R-HSA-983157;R-HSA-983140;R-HSA-983156
R-HSA-4420097	VEGFA-VEGFR2 Pathway	1	372	0	5288143604164353	5288143604164353	5	115	1.12535e+16	9606	Homo sapiens	Pxn		R-HSA-5218811;R-HSA-5218809;R-HSA-5218839;R-HSA-5218822;R-HSA-5218838
R-HSA-194138	Signaling by VEGF	1	381	0	5374411227358831	5374411227358831	5	121	1.18407e+16	9606	Homo sapiens	Pxn		R-HSA-5218811;R-HSA-5218809;R-HSA-5218839;R-HSA-5218822;R-HSA-5218838
R-HSA-177929	Signaling by EGFR	1	402	0	5569836542793044	5569836542793044	1	139	1.36021e+16	9606	Homo sapiens	Pxn		R-HSA-177923
R-HSA-983169	Class I MHC mediated antigen processing & presentation	1	461	0	6077330949618464	6077330949618464	4	45	4403561992367159	9606	Homo sapiens	Hectd1		R-HSA-983147;R-HSA-983157;R-HSA-983140;R-HSA-983156
R-HSA-5663202	Diseases of signal transduction	1	463	0	6093514581887671	6093514581887671	8	297	2906350914962325	9606	Homo sapiens	Smad3		R-HSA-3713560;R-HSA-3702184;R-HSA-3702153;R-HSA-3702186;R-HSA-3311014;R-HSA-3304394;R-HSA-3315483;R-HSA-3656523
R-HSA-5663205	Infectious disease	1	529	0	6592975551038807	6592975551038807	2	325	3180350327820726	9606	Homo sapiens	Kpna2		R-HSA-1176059;R-HSA-6791035
R-HSA-69278	Cell Cycle, Mitotic	1	533	0	6621184174009487	6621184174009487	1	294	2.87699e+16	9606	Homo sapiens	Ppp1r12b		R-HSA-3002811
R-HSA-199991	Membrane Trafficking	1	658	0	739778356583551	739778356583551	1	218	2.13328e+16	9606	Homo sapiens	Rab30		R-HSA-8849748
R-HSA-5653656	Vesicle-mediated transport	1	819	0	8148353961781598	8148353961781598	1	250	2446423329092866	9606	Homo sapiens	Rab30		R-HSA-8849748
R-HSA-1280215	Cytokine Signaling in Immune system	1	979	0	8685535450964115	8685535450964115	1	413	4041491339661415	9606	Homo sapiens	Kpna2		R-HSA-1176059
R-HSA-212436	Generic Transcription Pathway	1	1042	0	8852869250733596	8852869250733596	30	353	3.45435e+16	9606	Homo sapiens	Smad3		R-HSA-2187303;R-HSA-870538;R-HSA-2176491;R-HSA-2187309;R-HSA-2186607;R-HSA-2186741;R-HSA-1484099;R-HSA-2176503;R-HSA-2176502;R-HSA-2186747;R-HSA-209055;R-HSA-2187325;R-HSA-2187388;R-HSA-170847;R-HSA-2187395;R-HSA-2187330;R-HSA-2031355;R-HSA-173481;R-HSA-173545;R-HSA-2179274;R-HSA-2179276;R-HSA-173488;R-HSA-2186643;R-HSA-2106579;R-HSA-2127257;R-HSA-2176475;R-HSA-2106586;R-HSA-870449;R-HSA-2187293;…
R-HSA-1280218	Adaptive Immune System	1	1076	0	8934461522569597	8934461522569597	4	271	2651922888736667	9606	Homo sapiens	Hectd1		R-HSA-983147;R-HSA-983157;R-HSA-983140;R-HSA-983156
R-HSA-1266738	Developmental Biology	1	1159	0	9110879719159576	9110879719159576	5	472	4.61885e+16	9606	Homo sapiens	Smad3		R-HSA-173488;R-HSA-1535903;R-HSA-1181355;R-HSA-1225919;R-HSA-170847

## Sheet: Cluster_3_cont up
Pathway identifier	Pathway name	#Entities found	#Entities total	#WERT!	Entities pValue	Entities FDR	#Reactions found	#Reactions total	Reactions ratio	Species identifier	Species name	Submitted entities found	Mapped entities	Found reaction identifiers
R-HSA-535734	Fatty acid, triacylglycerol, and ketone body metabolism	11	430	0.0255814	3.76803e+16	1.43185e+16	33	151	1.47764e+16	9606	Homo sapiens	Echs1;Acaa2;Bdh1;Tecr;Fas;Acsl3;Gpd1l;Acads;Acad11;Hadh		R-HSA-77312;R-HSA-73920;R-HSA-77314;R-HSA-5655955;R-HSA-77319;R-HSA-77254;R-HSA-201035;R-HSA-77321;R-HSA-77256;R-HSA-77323;R-HSA-77325;R-HSA-77327;R-HSA-77329;R-HSA-77331;R-HSA-77333;R-HSA-77271;R-HSA-548831;R-HSA-77277;R-HSA-77340;R-HSA-77342;R-HSA-75872;R-HSA-77344;R-HSA-77283;R-HSA-548843;R-HSA-5695989;R-HSA-163756;R-HSA-75889;R-HSA-77301;R-HSA-77303;R-HSA-77304;R-HSA-73912;R-HSA-77309;R-HSA-8…
R-HSA-2262752	Cellular responses to stress	10	525	0.0190476	361597254306959	2493203852746667	17	207	2025638516488893	9606	Homo sapiens	Lamtor5;Psmd12;Prdx5;St13;Hspa4;Prdx1;Gstp1;Psmb9;Atp7a		R-HSA-3322995;R-HSA-3697882;R-HSA-5251955;R-HSA-5672017;R-HSA-5672817;R-HSA-5251959;R-HSA-3343700;R-HSA-3341343;R-HSA-5251942;R-HSA-3697838;R-HSA-5675790;R-HSA-5252041;R-HSA-5672010;R-HSA-1234159;R-HSA-3697894;R-HSA-5673768;R-HSA-5252079
R-HSA-556833	Metabolism of lipids and lipoproteins	23	1402	0.0164051	1.04951e+16	2493203852746667	76	898	8787552598101575	9606	Homo sapiens	Tecr;Gpd1l;Acads;Pkd2;Acad11;Sec24c;Sqle;Echs1;Vac14;Acaa2;Bdh1;Ap2b1;Gdpd1;Fas;Vldlr;Acsl3;Ldlr;Msmo1;Akr1b1;Hadh		R-HSA-77312;R-HSA-1482775;R-HSA-2426151;R-HSA-1655834;R-HSA-77314;R-HSA-429698;R-HSA-6784738;R-HSA-77319;R-HSA-171141;R-HSA-1675921;R-HSA-77321;R-HSA-1655825;R-HSA-77323;R-HSA-77325;R-HSA-77327;R-HSA-77329;R-HSA-1676168;R-HSA-77331;R-HSA-77333;R-HSA-1676174;R-HSA-77340;R-HSA-1675910;R-HSA-77342;R-HSA-77344;R-HSA-174624;R-HSA-5695989;R-HSA-163756;R-HSA-171059;R-HSA-6784735;R-HSA-8854462;R-HSA-7391…
R-HSA-1430728	Metabolism	49	3519	0.0139244	4187768654255075	1507596715531827	121	2145	2.09903e+16	9606	Homo sapiens	Pdhx;Aldh2;Gpd1l;Eno3;Pkd2;Acad11;Gcat;Sec24c;Psmd12;Sqle;Stxbp1;Acaa2;Ap2b1;Dbt;Atp5j;Akr1b1;Psmb9;Pfkm;Pgm1;Coasy;Maoa;Mdh1;Mdh2;Tecr;Ak2;Acads;Hk2;Dnm2;Acad8;Echs1;Vac14;Ca1;Ca3;Bdh1;Ivd;Gdpd1;Gstp1;Fas;Acsl3;Vldlr;Ldlr;Dlat;Msmo1;Hadh		R-HSA-77312;R-HSA-1482775;R-HSA-2426151;R-HSA-1655834;R-HSA-77314;R-HSA-77319;R-HSA-77321;R-HSA-1655825;R-HSA-77323;R-HSA-77325;R-HSA-77327;R-HSA-77329;R-HSA-77331;R-HSA-77333;R-HSA-70420;R-HSA-70427;R-HSA-6792572;R-HSA-77340;R-HSA-77342;R-HSA-199202;R-HSA-77344;R-HSA-174624;R-HSA-71723;R-HSA-6798667;R-HSA-203565;R-HSA-171059;R-HSA-70713;R-HSA-8854462;R-HSA-1655843;R-HSA-1655844;R-HSA-110145;R-HS…
R-HSA-382551	Transmembrane transport of small molecules	11	890	0.0123596	2660681215769173	2660681215769173	11	320	3.13142e+16	9606	Homo sapiens	Psmd12;Ahcyl2;Slc20a2;Slc12a4;Atp1b3;Atp2a1;Atp2a2;Atp6v1b2;Psmb9;Atp7a;Hk2		R-HSA-427910;R-HSA-427605;R-HSA-70420;R-HSA-5252133;R-HSA-418365;R-HSA-936802;R-HSA-426155;R-HSA-8866553;R-HSA-936897;R-HSA-8878664;R-HSA-917841
R-HSA-1280218	Adaptive Immune System	11	1076	0.010223	5004556345692696	5004556345692696	27	271	2651922888736667	9606	Homo sapiens	Psmd12;Ctsd;Ap2b1;Ap1b1;Tuba4a;Tpp2;Cul5;Psmb9;Dnm2;Sec24c		R-HSA-2130725;R-HSA-203979;R-HSA-2130731;R-HSA-2130349;R-HSA-983426;R-HSA-983425;R-HSA-983424;R-HSA-1168640;R-HSA-2213236;R-HSA-1236935;R-HSA-2130486;R-HSA-2213243;R-HSA-2130619;R-HSA-2213248;R-HSA-983150;R-HSA-983147;R-HSA-2130504;R-HSA-983140;R-HSA-2130640;R-HSA-2130641;R-HSA-983422;R-HSA-2130706;R-HSA-983162;R-HSA-1236970;R-HSA-5607724;R-HSA-983157;R-HSA-983156
R-HSA-168249	Innate Immune System	15	1528	0.00981675	5533205917878699	5533205917878699	51	702	6869556708092768	9606	Homo sapiens	Ctsd;Atp6v1b2;Stbd1;Mettl7a;Clu;Atp7a;Dnm2;Psmd12;Map2k2;Mavs;Adam10;Gstp1;Psmb9;Pgm1		R-HSA-173709;R-HSA-6799350;R-HSA-933532;R-HSA-933530;R-HSA-936475;R-HSA-933528;R-HSA-933526;R-HSA-173723;R-HSA-933527;R-HSA-173720;R-HSA-933525;R-HSA-933523;R-HSA-173725;R-HSA-5674366;R-HSA-933538;R-HSA-933539;R-HSA-933537;R-HSA-990526;R-HSA-936381;R-HSA-936378;R-HSA-6803545;R-HSA-5674132;R-HSA-5672980;R-HSA-5672978;R-HSA-5674130;R-HSA-6800426;R-HSA-168909;R-HSA-990528;R-HSA-5674373;R-HSA-6800434…
R-HSA-168256	Immune System	24	2591	0.00926283	6745998151376214	6745998151376214	80	1284	1256483021822096	9606	Homo sapiens	Maoa;Ctsd;Atp6v1b2;Stbd1;Mettl7a;Clu;Atp7a;Dnm2;Sec24c;Psmd12;Map2k2;Mavs;Ap2b1;Ap1b1;Adam10;Gstp1;Tuba4a;Tpp2;Cul5;Psmb9;Pgm1		R-HSA-2130725;R-HSA-2130731;R-HSA-2130349;R-HSA-983426;R-HSA-983425;R-HSA-173709;R-HSA-983424;R-HSA-1168640;R-HSA-6799350;R-HSA-933532;R-HSA-933530;R-HSA-936475;R-HSA-933528;R-HSA-2130486;R-HSA-933526;R-HSA-173723;R-HSA-933527;R-HSA-173720;R-HSA-2130619;R-HSA-933525;R-HSA-933523;R-HSA-173725;R-HSA-2213248;R-HSA-5674366;R-HSA-933538;R-HSA-933539;R-HSA-933537;R-HSA-6797271;R-HSA-990526;R-HSA-213070…
R-HSA-1643685	Disease	12	1487	0.00806994	8112643181297381	8112643181297381	49	896	8767981211468832	9606	Homo sapiens	Psmd12;Maoa;Slc20a2;Map2k2;Ap2b1;Ap1b1;Prdx1;Adam10;Cul5;Psmb9;Pgm1;Ipo5		R-HSA-6802919;R-HSA-6802918;R-HSA-6802916;R-HSA-182279;R-HSA-6802914;R-HSA-5609939;R-HSA-6802912;R-HSA-6802927;R-HSA-6802926;R-HSA-6802925;R-HSA-6802924;R-HSA-182286;R-HSA-6802922;R-HSA-6802921;R-HSA-2666278;R-HSA-6802935;R-HSA-6802934;R-HSA-2220976;R-HSA-6802933;R-HSA-5211356;R-HSA-6802932;R-HSA-6802943;R-HSA-182171;R-HSA-6802942;R-HSA-6802941;R-HSA-182186;R-HSA-2730752;R-HSA-8866858;R-HSA-16759…
R-HSA-162582	Signal Transduction	20	2905	0.00688468	9784094565183498	9784094565183498	71	1836	1796653292885801	9606	Homo sapiens	Lamtor5;Pdhx;Rhot1;Atp2a1;Atp2a2;Atp6v1b2;Rhod;Dnm2;Psmd12;Map2k2;Ap2b1;Adam10;Tuba4a;Fas;Ldlr;Akr1b1;Dlat;Cul5;Psmb9		R-HSA-5653974;R-HSA-5653968;R-HSA-71050;R-HSA-4608855;R-HSA-1918095;R-HSA-177946;R-HSA-2424254;R-HSA-3640874;R-HSA-5687112;R-HSA-109858;R-HSA-194854;R-HSA-109862;R-HSA-5674366;R-HSA-203946;R-HSA-109864;R-HSA-4641260;R-HSA-5672828;R-HSA-1912374;R-HSA-4641256;R-HSA-5672824;R-HSA-5666169;R-HSA-165680;R-HSA-380979;R-HSA-5610733;R-HSA-157626;R-HSA-165692;R-HSA-157629;R-HSA-5362448;R-HSA-5674132;R-HSA-…
R-HSA-392499	Metabolism of proteins	12	1857	0.00646204	9645792249308962	9645792249308962	39	670	6556414521968881	9606	Homo sapiens	Psmd12;Rhot1;Ctsd;Timm10b;Mavs;Tuba4a;Tomm70a;Psmb9;Uggt1;Hspd1;Sec24c		R-HSA-1299475;R-HSA-5694421;R-HSA-5694418;R-HSA-1299478;R-HSA-203973;R-HSA-389954;R-HSA-5694417;R-HSA-389964;R-HSA-6809006;R-HSA-1299480;R-HSA-389961;R-HSA-6809003;R-HSA-389963;R-HSA-389972;R-HSA-2022412;R-HSA-389974;R-HSA-5689539;R-HSA-389970;R-HSA-389980;R-HSA-5665871;R-HSA-5694413;R-HSA-548884;R-HSA-2022403;R-HSA-389976;R-HSA-389978;R-HSA-5694409;R-HSA-1268022;R-HSA-5665854;R-HSA-5694527;R-HSA…
R-HSA-3299685	Detoxification of Reactive Oxygen Species	5	65	0	5.07483e+11	5569964133154959	6	33	3.22928e+16	9606	Homo sapiens	Prdx5;Prdx1;Gstp1;Atp7a		R-HSA-3322995;R-HSA-3697882;R-HSA-3697838;R-HSA-3343700;R-HSA-3341343;R-HSA-3697894
R-HSA-77289	Mitochondrial Fatty Acid Beta-Oxidation	6	83	0	1.93942e+12	5569964133154959	24	41	4012134259712301	9606	Homo sapiens	Echs1;Acaa2;Acads;Acad11;Hadh		R-HSA-77312;R-HSA-77344;R-HSA-77283;R-HSA-5695989;R-HSA-77314;R-HSA-77319;R-HSA-77254;R-HSA-77321;R-HSA-77256;R-HSA-77323;R-HSA-77325;R-HSA-77327;R-HSA-77329;R-HSA-77331;R-HSA-77301;R-HSA-77333;R-HSA-77271;R-HSA-77303;R-HSA-77304;R-HSA-77277;R-HSA-77309;R-HSA-77340;R-HSA-8874745;R-HSA-77342
R-HSA-70326	Glucose metabolism	7	127	0	2.95119e+12	5569964133154959	8	75	7339269987278599	9606	Homo sapiens	Mdh1;Mdh2;Eno3;Pfkm;Pgm1;Hk2		R-HSA-70272;R-HSA-70467;R-HSA-70420;R-HSA-71783;R-HSA-70427;R-HSA-71660;R-HSA-70494;R-HSA-198508
R-HSA-2132295	MHC class II antigen presentation	7	142	0	5.70978e+11	5569964133154959	12	24	2.34857e+16	9606	Homo sapiens	Ctsd;Ap2b1;Ap1b1;Tuba4a;Dnm2;Sec24c		R-HSA-2130640;R-HSA-2130641;R-HSA-2213248;R-HSA-2130706;R-HSA-2213236;R-HSA-2130725;R-HSA-2130486;R-HSA-2130504;R-HSA-2213243;R-HSA-2130619;R-HSA-2130731;R-HSA-2130349
R-HSA-373760	L1CAM interactions	6	129	0	1.89346e+16	8899252498333965	9	54	5284274390840591	9606	Homo sapiens	Map2k2;Ap2b1;Itga1;Tuba4a;Dnm2		R-HSA-555065;R-HSA-445079;R-HSA-445077;R-HSA-445088;R-HSA-109862;R-HSA-392749;R-HSA-392748;R-HSA-445071;R-HSA-374696
R-HSA-397014	Muscle contraction	8	214	0	1.38493e+16	7755591148150831	12	39	3816420393384871	9606	Homo sapiens	Des;Atp1b3;Atp2a1;Itga1;Tpm1;Atp2a2;Dysf		R-HSA-427910;R-HSA-390597;R-HSA-5263633;R-HSA-445700;R-HSA-390598;R-HSA-390593;R-HSA-445699;R-HSA-390595;R-HSA-5263628;R-HSA-445704;R-HSA-936897;R-HSA-445705
R-HSA-162909	Host Interactions of HIV factors	5	148	0	1.62999e+16	2493203852746667	13	54	5284274390840591	9606	Homo sapiens	Psmd12;Ap2b1;Ap1b1;Cul5;Psmb9		R-HSA-182279;R-HSA-182186;R-HSA-180555;R-HSA-182286;R-HSA-167597;R-HSA-167537;R-HSA-167601;R-HSA-182198;R-HSA-182263;R-HSA-180603;R-HSA-182171;R-HSA-180540;R-HSA-180573
R-HSA-983712	Ion channel transport	5	236	0	8602539629629935	2493203852746667	5	43	420784812603973	9606	Homo sapiens	Atp1b3;Atp2a1;Atp2a2;Atp6v1b2;Atp7a		R-HSA-427910;R-HSA-5252133;R-HSA-418365;R-HSA-936802;R-HSA-936897
R-HSA-162906	HIV Infection	5	253	0	1072288682357928	2493203852746667	13	155	1.51678e+16	9606	Homo sapiens	Psmd12;Ap2b1;Ap1b1;Cul5;Psmb9		R-HSA-182279;R-HSA-182186;R-HSA-180555;R-HSA-182286;R-HSA-167597;R-HSA-167537;R-HSA-167601;R-HSA-182198;R-HSA-182263;R-HSA-180603;R-HSA-182171;R-HSA-180540;R-HSA-180573
R-HSA-71387	Metabolism of carbohydrates	8	442	0	729951880422991	2493203852746667	10	234	2.28985e+16	9606	Homo sapiens	Mdh1;Mdh2;Akr1b1;Eno3;Pfkm;Pgm1;Hk2		R-HSA-70272;R-HSA-70467;R-HSA-70420;R-HSA-71783;R-HSA-6787329;R-HSA-5652172;R-HSA-70427;R-HSA-71660;R-HSA-70494;R-HSA-198508
R-HSA-5688426	Deubiquitination	5	286	0	1.54851e+16	2493203852746667	5	76	7437126920442313	9606	Homo sapiens	Psmd12;Rhot1;Mavs;Tomm70a;Psmb9		R-HSA-936381;R-HSA-5689539;R-HSA-5665854;R-HSA-5665871;R-HSA-5696872
R-HSA-6798695	Neutrophil degranulation	8	480	0	1044820799225723	2493203852746667	7	10	9.78569e+11	9606	Homo sapiens	Psmd12;Ctsd;Adam10;Gstp1;Stbd1;Mettl7a;Pgm1		R-HSA-6799350;R-HSA-6800434;R-HSA-6798749;R-HSA-6798748;R-HSA-6798747;R-HSA-6800426;R-HSA-6798745
R-HSA-1474244	Extracellular matrix organization	5	321	0	2.13204e+16	2493203852746667	14	314	307270770134064	9606	Homo sapiens	Ctsd;Itga1;Adam10;Itga7;Htra1		R-HSA-2484965;R-HSA-2471621;R-HSA-2168960;R-HSA-114563;R-HSA-2467436;R-HSA-216040;R-HSA-2681667;R-HSA-2327695;R-HSA-4084912;R-HSA-4224014;R-HSA-216051;R-HSA-4084910;R-HSA-8855825;R-HSA-216058
R-HSA-422475	Axon guidance	9	598	0	1.39237e+16	2493203852746667	23	286	2798708288482239	9606	Homo sapiens	Psmd12;Map2k2;Ap2b1;Itga1;Adam10;Tuba4a;Psmb9;Dnm2		R-HSA-5674132;R-HSA-5672980;R-HSA-5672978;R-HSA-5674130;R-HSA-445088;R-HSA-109862;R-HSA-434990;R-HSA-392749;R-HSA-5658430;R-HSA-5674366;R-HSA-392748;R-HSA-445071;R-HSA-374696;R-HSA-3928660;R-HSA-555065;R-HSA-445079;R-HSA-445077;R-HSA-5674373;R-HSA-3928654;R-HSA-5674496;R-HSA-5672972;R-HSA-5672973;R-HSA-5672969
R-HSA-74752	Signaling by Insulin receptor	5	347	0	2.60468e+16	2.60468e+16	25	99	968783638320775	9606	Homo sapiens	Lamtor5;Psmd12;Map2k2;Atp6v1b2;Psmb9		R-HSA-5653974;R-HSA-5674132;R-HSA-5672980;R-HSA-5672978;R-HSA-5674130;R-HSA-5653968;R-HSA-5674373;R-HSA-165718;R-HSA-5674496;R-HSA-5672972;R-HSA-5672973;R-HSA-5672843;R-HSA-5672969;R-HSA-74723;R-HSA-447074;R-HSA-5653936;R-HSA-377186;R-HSA-5658430;R-HSA-5674366;R-HSA-5672828;R-HSA-5672824;R-HSA-165680;R-HSA-5252133;R-HSA-380979;R-HSA-165692
R-HSA-5663205	Infectious disease	7	529	0	2701835699161149	2701835699161149	15	325	3180350327820726	9606	Homo sapiens	Psmd12;Map2k2;Ap2b1;Ap1b1;Cul5;Psmb9;Ipo5		R-HSA-182279;R-HSA-182186;R-HSA-180555;R-HSA-182286;R-HSA-167597;R-HSA-167537;R-HSA-167601;R-HSA-5211356;R-HSA-182198;R-HSA-182263;R-HSA-180603;R-HSA-182171;R-HSA-192830;R-HSA-180540;R-HSA-180573
R-HSA-71291	Metabolism of amino acids and derivatives	8	635	0	2.93014e+16	2.93014e+16	9	247	2.41707e+16	9606	Homo sapiens	Psmd12;Pdhx;Acad8;Ivd;Dbt;Dlat;Psmb9;Gcat		R-HSA-353125;R-HSA-5693153;R-HSA-70745;R-HSA-70713;R-HSA-5693148;R-HSA-70859;R-HSA-6792572;R-HSA-6798667;R-HSA-6798345
R-HSA-112316	Neuronal System	5	410	0	3822582420971501	3822582420971501	19	151	1.47764e+16	9606	Homo sapiens	Stxbp1;Maoa;Ap2b1;Aldh2		R-HSA-141186;R-HSA-888589;R-HSA-380901;R-HSA-380869;R-HSA-380608;R-HSA-379395;R-HSA-380905;R-HSA-374922;R-HSA-379382;R-HSA-372529;R-HSA-374899;R-HSA-6794353;R-HSA-374909;R-HSA-416639;R-HSA-210426;R-HSA-380574;R-HSA-372505;R-HSA-210430;R-HSA-917744
R-HSA-199991	Membrane Trafficking	8	658	0	3266928459253089	3266928459253089	59	218	2.13328e+16	9606	Homo sapiens	Scarb2;Ap2b1;Ap1b1;Tuba4a;Ldlr;Dnm2;Sec24c		R-HSA-8868230;R-HSA-5694421;R-HSA-5694418;R-HSA-5694417;R-HSA-8868236;R-HSA-2316347;R-HSA-8871196;R-HSA-5694413;R-HSA-8871194;R-HSA-8871193;R-HSA-190877;R-HSA-5694409;R-HSA-8867756;R-HSA-8868651;R-HSA-8867754;R-HSA-8868648;R-HSA-5694439;R-HSA-8868661;R-HSA-5694436;R-HSA-8868660;R-HSA-196017;R-HSA-8868659;R-HSA-8868658;R-HSA-5694435;R-HSA-190519;R-HSA-432688;R-HSA-5694446;R-HSA-8869438;R-HSA-19052…
R-HSA-187037	NGF signalling via TRKA from the plasma membrane	5	427	0	4155802789560721	4155802789560721	14	143	1.39935e+16	9606	Homo sapiens	Psmd12;Map2k2;Ap2b1;Psmb9;Dnm2		R-HSA-5674132;R-HSA-5672980;R-HSA-5672978;R-HSA-5674130;R-HSA-177479;R-HSA-5658430;R-HSA-5674366;R-HSA-177491;R-HSA-5674373;R-HSA-5674496;R-HSA-5672972;R-HSA-5672973;R-HSA-177501;R-HSA-5672969
R-HSA-983169	Class I MHC mediated antigen processing & presentation	5	461	0	4812396559830081	4812396559830081	13	45	4403561992367159	9606	Homo sapiens	Psmd12;Tpp2;Cul5;Psmb9;Sec24c		R-HSA-983150;R-HSA-983147;R-HSA-203979;R-HSA-983140;R-HSA-983426;R-HSA-983425;R-HSA-983424;R-HSA-983422;R-HSA-1236935;R-HSA-983162;R-HSA-1236970;R-HSA-983157;R-HSA-983156
R-HSA-3700989	Transcriptional Regulation by TP53	5	483	0	5224410816292251	5224410816292251	6	256	2.50514e+16	9606	Homo sapiens	Lamtor5;Prdx5;Prdx1;Fas		R-HSA-6799815;R-HSA-6800001;R-HSA-380979;R-HSA-5631885;R-HSA-5631903;R-HSA-3341343
R-HSA-109582	Hemostasis	8	796	0	5333076616386424	5333076616386424	7	322	3150993247871612	9606	Homo sapiens	Atp1b3;Atp2a1;Sccpdh;Itga1;Atp2a2;Tuba4a;Clu		R-HSA-114563;R-HSA-482772;R-HSA-983259;R-HSA-375133;R-HSA-481007;R-HSA-418365;R-HSA-983266
R-HSA-5653656	Vesicle-mediated transport	8	819	0	56614003477236	56614003477236	59	250	2446423329092866	9606	Homo sapiens	Scarb2;Ap2b1;Ap1b1;Tuba4a;Ldlr;Dnm2;Sec24c		R-HSA-8868230;R-HSA-5694421;R-HSA-5694418;R-HSA-5694417;R-HSA-8868236;R-HSA-2316347;R-HSA-8871196;R-HSA-5694413;R-HSA-8871194;R-HSA-8871193;R-HSA-190877;R-HSA-5694409;R-HSA-8867756;R-HSA-8868651;R-HSA-8867754;R-HSA-8868648;R-HSA-5694439;R-HSA-8868661;R-HSA-5694436;R-HSA-8868660;R-HSA-196017;R-HSA-8868659;R-HSA-8868658;R-HSA-5694435;R-HSA-190519;R-HSA-432688;R-HSA-5694446;R-HSA-8869438;R-HSA-19052…
R-HSA-166520	Signalling by NGF	5	521	0	5901159844400052	5901159844400052	14	197	1.92778e+16	9606	Homo sapiens	Psmd12;Map2k2;Ap2b1;Psmb9;Dnm2		R-HSA-5674132;R-HSA-5672980;R-HSA-5672978;R-HSA-5674130;R-HSA-177479;R-HSA-5658430;R-HSA-5674366;R-HSA-177491;R-HSA-5674373;R-HSA-5674496;R-HSA-5672972;R-HSA-5672973;R-HSA-177501;R-HSA-5672969
R-HSA-1266738	Developmental Biology	9	1159	0	8191869066510387	8191869066510387	23	472	4.61885e+16	9606	Homo sapiens	Psmd12;Map2k2;Ap2b1;Itga1;Adam10;Tuba4a;Psmb9;Dnm2		R-HSA-5674132;R-HSA-5672980;R-HSA-5672978;R-HSA-5674130;R-HSA-445088;R-HSA-109862;R-HSA-434990;R-HSA-392749;R-HSA-5658430;R-HSA-5674366;R-HSA-392748;R-HSA-445071;R-HSA-374696;R-HSA-3928660;R-HSA-555065;R-HSA-445079;R-HSA-445077;R-HSA-5674373;R-HSA-3928654;R-HSA-5674496;R-HSA-5672972;R-HSA-5672973;R-HSA-5672969
R-HSA-597592	Post-translational protein modification	9	1191	0	8427747015553401	8427747015553401	22	390	3.81642e+16	9606	Homo sapiens	Psmd12;Rhot1;Mavs;Tuba4a;Tomm70a;Psmb9;Uggt1;Sec24c		R-HSA-5694421;R-HSA-5694418;R-HSA-203973;R-HSA-5694417;R-HSA-5665854;R-HSA-6809006;R-HSA-5694527;R-HSA-204008;R-HSA-6809003;R-HSA-5694522;R-HSA-5694439;R-HSA-5694436;R-HSA-936381;R-HSA-5689539;R-HSA-5694435;R-HSA-5694446;R-HSA-5665871;R-HSA-5694413;R-HSA-548884;R-HSA-5696872;R-HSA-5694441;R-HSA-5694409
R-HSA-449147	Signaling by Interleukins	5	662	0	7890060082184263	7890060082184263	12	281	2.74978e+16	9606	Homo sapiens	Psmd12;Maoa;Map2k2;Psmb9		R-HSA-6797271;R-HSA-5674132;R-HSA-5672980;R-HSA-5674373;R-HSA-5672978;R-HSA-5674130;R-HSA-5674496;R-HSA-5658430;R-HSA-5674366;R-HSA-5672972;R-HSA-5672973;R-HSA-5672969
R-HSA-212436	Generic Transcription Pathway	7	1042	0	8978757037961873	8978757037961873	8	353	3.45435e+16	9606	Homo sapiens	Lamtor5;Prdx5;Prdx1;Fas;Hspd1		R-HSA-6799815;R-HSA-8869558;R-HSA-8869542;R-HSA-6800001;R-HSA-380979;R-HSA-5631885;R-HSA-5631903;R-HSA-3341343
R-HSA-1280215	Cytokine Signaling in Immune system	5	979	0	9689984138670460	9689984138670460	15	413	4041491339661415	9606	Homo sapiens	Psmd12;Maoa;Map2k2;Psmb9		R-HSA-5674132;R-HSA-5672980;R-HSA-5672978;R-HSA-5674130;R-HSA-5607731;R-HSA-5658430;R-HSA-5674366;R-HSA-6797271;R-HSA-5674373;R-HSA-5674496;R-HSA-5668481;R-HSA-5672972;R-HSA-5672973;R-HSA-5668520;R-HSA-5672969
R-HSA-74160	Gene Expression	9	2124	0	9994972932472532	9994972932472532	9	782	7652412173402486	9606	Homo sapiens	Lamtor5;Psmd12;Prdx5;Prdx1;Fas;Psmb9;Hspd1		R-HSA-6799815;R-HSA-8869558;R-HSA-8869542;R-HSA-450466;R-HSA-6800001;R-HSA-380979;R-HSA-5631885;R-HSA-5631903;R-HSA-3341343
R-HSA-5609974	Defective PGM1 causes PGM1-CDG (CDG1t)	1	2	0	1.95923e+16	2493203852746667	1	1	9.78569e+10	9606	Homo sapiens	Pgm1		R-HSA-5609939
R-HSA-5619111	Defective SLC20A2 causes idiopathic basal ganglia calcification 1 (IBGC1)	1	3	0	2.92452e+16	2493203852746667	1	1	9.78569e+10	9606	Homo sapiens	Slc20a2		R-HSA-5625123
R-HSA-5579012	Defective MAOA causes Brunner syndrome (BRUNS)	1	4	0	3880369808677253	2493203852746667	1	1	9.78569e+10	9606	Homo sapiens	Maoa		R-HSA-5603108
R-HSA-77350	Beta oxidation of hexanoyl-CoA to butanoyl-CoA	4	18	0	3.48284e+10	2.16284e+16	4	4	3.91428e+11	9606	Homo sapiens	Echs1;Acads;Hadh		R-HSA-77321;R-HSA-77323;R-HSA-77325;R-HSA-77327
R-HSA-8869496	TFAP2A acts as a transcriptional repressor during retinoic acid induced cell differentiation	2	9	0	371028970777465	1.43185e+16	2	7	6.84999e+11	9606	Homo sapiens	Hspd1		R-HSA-8869558;R-HSA-8869542
R-HSA-77346	Beta oxidation of decanoyl-CoA to octanoyl-CoA-CoA	3	18	0	8.07241e+09	5569964133154959	3	4	3.91428e+11	9606	Homo sapiens	Echs1;Hadh		R-HSA-77344;R-HSA-77340;R-HSA-77342
R-HSA-77310	Beta oxidation of lauroyl-CoA to decanoyl-CoA-CoA	3	18	0	8.07241e+09	5569964133154959	3	4	3.91428e+11	9606	Homo sapiens	Echs1;Hadh		R-HSA-77254;R-HSA-77256;R-HSA-77309
R-HSA-77348	Beta oxidation of octanoyl-CoA to hexanoyl-CoA	3	18	0	8.07241e+09	5569964133154959	3	4	3.91428e+11	9606	Homo sapiens	Echs1;Hadh		R-HSA-77329;R-HSA-77331;R-HSA-77333
R-HSA-8866427	VLDLR internalisation and degradation	2	12	0	6469838679599049	2.07035e+16	4	4	3.91428e+11	9606	Homo sapiens	Ap2b1;Vldlr		R-HSA-8855111;R-HSA-8854628;R-HSA-8855131;R-HSA-8855130
R-HSA-75157	FasL/ CD95L signaling	1	6	0	576414852389584	2493203852746667	3	5	4.89285e+11	9606	Homo sapiens	Fas		R-HSA-83650;R-HSA-71050;R-HSA-75244
R-HSA-77352	Beta oxidation of butanoyl-CoA to acetyl-CoA	3	19	0	9.42593e+11	5844078444570999	3	4	3.91428e+11	9606	Homo sapiens	Echs1;Acads;Hadh		R-HSA-77312;R-HSA-77314;R-HSA-77319
R-HSA-380612	Metabolism of serotonin	2	13	0	7544400180203081	2.19482e+16	2	2	1.95714e+11	9606	Homo sapiens	Maoa;Aldh2		R-HSA-141186;R-HSA-380608
R-HSA-8866376	Reelin signalling pathway	1	7	0	669225404360162	2493203852746667	4	4	3.91428e+11	9606	Homo sapiens	Vldlr		R-HSA-8855237;R-HSA-8854466;R-HSA-8855232;R-HSA-8855259
R-HSA-418359	Reduction of cytosolic Ca++ levels	2	15	0	9916105885376948	2.47903e+16	1	3	2.93571e+12	9606	Homo sapiens	Atp2a1;Atp2a2		R-HSA-418365
R-HSA-70370	Galactose catabolism	2	15	0	9916105885376948	2.47903e+16	1	4	3.91428e+11	9606	Homo sapiens	Pgm1		R-HSA-70427
R-HSA-380615	Serotonin clearance from the synaptic cleft	2	16	0	1.12102e+16	2493203852746667	2	3	2.93571e+12	9606	Homo sapiens	Maoa;Aldh2		R-HSA-141186;R-HSA-380608
R-HSA-182218	Nef Mediated CD8 Down-regulation	1	8	0	761128904723567	2493203852746667	3	3	2.93571e+12	9606	Homo sapiens	Ap2b1		R-HSA-182198;R-HSA-182186;R-HSA-182171
R-HSA-166665	Terminal pathway of complement	1	8	0	761128904723567	2493203852746667	4	5	4.89285e+11	9606	Homo sapiens	Clu		R-HSA-173723;R-HSA-173720;R-HSA-173709;R-HSA-173725
R-HSA-5674499	Negative feedback regulation of MAPK pathway	1	8	0	761128904723567	2493203852746667	1	3	2.93571e+12	9606	Homo sapiens	Map2k2		R-HSA-5674496
R-HSA-427652	Sodium-coupled phosphate cotransporters	1	8	0	761128904723567	2493203852746667	1	3	2.93571e+12	9606	Homo sapiens	Slc20a2		R-HSA-427605
R-HSA-2660825	Signaling by NOTCH1 t(7;9)(NOTCH1:M1580_K2555) Translocation Mutant	1	8	0	761128904723567	2493203852746667	1	5	4.89285e+11	9606	Homo sapiens	Adam10		R-HSA-2666278
R-HSA-2660826	Constitutive Signaling by NOTCH1 t(7;9)(NOTCH1:M1580_K2555) Translocation Mutant	1	8	0	761128904723567	2493203852746667	1	5	4.89285e+11	9606	Homo sapiens	Adam10		R-HSA-2666278
R-HSA-163765	ChREBP activates metabolic gene expression	1	8	0	761128904723567	2493203852746667	1	6	5.87142e+11	9606	Homo sapiens	Fas		R-HSA-163733
R-HSA-1475029	Reversible hydration of carbon dioxide	2	17	0	1.25744e+16	2493203852746667	2	8	7.82855e+11	9606	Homo sapiens	Ca1;Ca3		R-HSA-1475026;R-HSA-1475022
R-HSA-177504	Retrograde neurotrophin signalling	2	18	0	1.40072e+16	2493203852746667	3	3	2.93571e+12	9606	Homo sapiens	Ap2b1;Dnm2		R-HSA-177491;R-HSA-177479;R-HSA-177501
R-HSA-6803211	TP53 Regulates Transcription of Death Receptors and Ligands	2	18	0	1.40072e+16	2493203852746667	2	7	6.84999e+11	9606	Homo sapiens	Fas		R-HSA-6799815;R-HSA-6800001
R-HSA-445355	Smooth Muscle Contraction	4	37	0	5.38062e+11	5569964133154959	6	9	8.80712e+11	9606	Homo sapiens	Itga1;Tpm1;Dysf		R-HSA-5263633;R-HSA-445700;R-HSA-445699;R-HSA-5263628;R-HSA-445704;R-HSA-445705
R-HSA-203641	NOSTRIN mediated eNOS trafficking	1	10	0	9422498506700716	2493203852746667	3	4	3.91428e+11	9606	Homo sapiens	Dnm2		R-HSA-203625;R-HSA-203662;R-HSA-203565
R-HSA-167590	Nef Mediated CD4 Down-regulation	1	10	0	9422498506700716	2493203852746667	3	5	4.89285e+11	9606	Homo sapiens	Ap2b1		R-HSA-167537;R-HSA-167601;R-HSA-167597
R-HSA-379398	Enzymatic degradation of Dopamine by monoamine oxidase	1	10	0	9422498506700716	2493203852746667	1	2	1.95714e+11	9606	Homo sapiens	Maoa		R-HSA-379382
R-HSA-426117	Cation-coupled Chloride cotransporters	1	10	0	9422498506700716	2493203852746667	1	3	2.93571e+12	9606	Homo sapiens	Slc12a4		R-HSA-426155
R-HSA-447041	CHL1 interactions	1	10	0	9422498506700716	2493203852746667	1	5	4.89285e+11	9606	Homo sapiens	Itga1		R-HSA-445088
R-HSA-190840	Microtubule-dependent trafficking of connexons from Golgi to the plasma membrane	2	21	0	1.8703e+16	2493203852746667	1	2	1.95714e+11	9606	Homo sapiens	Tuba4a		R-HSA-190520
R-HSA-164938	Nef-mediates down modulation of cell surface receptors by recruiting them to clathrin adapters	2	22	0	2039600086358928	2493203852746667	9	15	1.46785e+16	9606	Homo sapiens	Ap2b1;Ap1b1		R-HSA-167537;R-HSA-167601;R-HSA-182198;R-HSA-182279;R-HSA-182263;R-HSA-182186;R-HSA-182171;R-HSA-182286;R-HSA-167597
R-HSA-190872	Transport of connexons to the plasma membrane	2	22	0	2039600086358928	2493203852746667	1	3	2.93571e+12	9606	Homo sapiens	Tuba4a		R-HSA-190520
R-HSA-164940	Nef mediated downregulation of MHC class I complex cell surface expression	1	11	0	1.03148e+16	2493203852746667	3	4	3.91428e+11	9606	Homo sapiens	Ap1b1		R-HSA-182279;R-HSA-182263;R-HSA-182286
R-HSA-5652227	Fructose biosynthesis	1	11	0	1.03148e+16	2493203852746667	1	2	1.95714e+11	9606	Homo sapiens	Akr1b1		R-HSA-5652172
R-HSA-196025	Formation of annular gap junctions	1	11	0	1.03148e+16	2493203852746667	1	2	1.95714e+11	9606	Homo sapiens	Dnm2		R-HSA-196017
R-HSA-1912420	Pre-NOTCH Processing in Golgi	2	23	0	2.21505e+16	2493203852746667	1	8	7.82855e+11	9606	Homo sapiens	Atp2a1;Atp2a2		R-HSA-1912374
R-HSA-204174	Regulation of pyruvate dehydrogenase (PDH) complex	2	24	0	2396526395165044	2493203852746667	2	2	1.95714e+11	9606	Homo sapiens	Pdhx;Dlat		R-HSA-203946;R-HSA-204169
R-HSA-389977	Post-chaperonin tubulin folding pathway	2	24	0	2396526395165044	2493203852746667	6	9	8.80712e+11	9606	Homo sapiens	Tuba4a		R-HSA-389972;R-HSA-389974;R-HSA-389964;R-HSA-389976;R-HSA-389963;R-HSA-389978
R-HSA-112411	MAPK1 (ERK2) activation	1	12	0	1.11985e+16	2493203852746667	3	3	2.93571e+12	9606	Homo sapiens	Map2k2		R-HSA-109858;R-HSA-109862;R-HSA-109864
R-HSA-190873	Gap junction degradation	1	12	0	1.11985e+16	2493203852746667	3	4	3.91428e+11	9606	Homo sapiens	Dnm2		R-HSA-196017;R-HSA-190519;R-HSA-190829
R-HSA-379397	Enzymatic degradation of dopamine by COMT	1	12	0	1.11985e+16	2493203852746667	1	2	1.95714e+11	9606	Homo sapiens	Maoa		R-HSA-379395
R-HSA-1980150	Signaling by NOTCH4	1	12	0	1.11985e+16	2493203852746667	1	4	3.91428e+11	9606	Homo sapiens	Adam10		R-HSA-157649
R-HSA-1980148	Signaling by NOTCH3	1	12	0	1.11985e+16	2493203852746667	1	4	3.91428e+11	9606	Homo sapiens	Adam10		R-HSA-157626
R-HSA-418889	Ligand-independent caspase activation via DCC	1	12	0	1.11985e+16	2493203852746667	1	8	7.82855e+11	9606	Homo sapiens	Dapk3		R-HSA-418849
R-HSA-77286	mitochondrial fatty acid beta-oxidation of saturated fatty acids	4	50	0	1.62598e+16	8292521982286694	22	28	273999412858401	9606	Homo sapiens	Echs1;Acads;Hadh		R-HSA-77312;R-HSA-77344;R-HSA-77283;R-HSA-77314;R-HSA-77319;R-HSA-77254;R-HSA-77321;R-HSA-77256;R-HSA-77323;R-HSA-77325;R-HSA-77327;R-HSA-77329;R-HSA-77331;R-HSA-77301;R-HSA-77333;R-HSA-77271;R-HSA-77303;R-HSA-77304;R-HSA-77277;R-HSA-77309;R-HSA-77340;R-HSA-77342
R-HSA-3322077	Glycogen synthesis	2	25	0	2.58388e+16	2493203852746667	1	22	2152852529601722	9606	Homo sapiens	Pgm1		R-HSA-70272
R-HSA-70221	Glycogen breakdown (glycogenolysis)	2	26	0	2.777e+16	2493203852746667	1	16	1.56571e+16	9606	Homo sapiens	Pgm1		R-HSA-70427
R-HSA-8849175	Threonine catabolism	1	13	0	1.20735e+16	2493203852746667	2	2	1.95714e+11	9606	Homo sapiens	Gcat		R-HSA-6798667;R-HSA-6798345
R-HSA-6803544	Ion influx/efflux at host-pathogen interface	1	13	0	1.20735e+16	2493203852746667	1	2	1.95714e+11	9606	Homo sapiens	Atp7a		R-HSA-6803545
R-HSA-141333	Biogenic amines are oxidatively deaminated to aldehydes by MAOA and MAOB	1	13	0	1.20735e+16	2493203852746667	1	3	2.93571e+12	9606	Homo sapiens	Maoa		R-HSA-141186
R-HSA-77108	Utilization of Ketone Bodies	1	13	0	1.20735e+16	2493203852746667	1	3	2.93571e+12	9606	Homo sapiens	Bdh1		R-HSA-73920
R-HSA-390522	Striated Muscle Contraction	3	40	0	756833268107826	2.19482e+16	4	4	3.91428e+11	9606	Homo sapiens	Des;Tpm1		R-HSA-390597;R-HSA-390598;R-HSA-390593;R-HSA-390595
R-HSA-437239	Recycling pathway of L1	4	54	0	2.14624e+16	9443452136398768	7	14	1369997064292005	9606	Homo sapiens	Ap2b1;Tuba4a;Dnm2		R-HSA-555065;R-HSA-445079;R-HSA-445077;R-HSA-392749;R-HSA-392748;R-HSA-445071;R-HSA-374696
R-HSA-933543	NF-kB activation through FADD/RIP-1 pathway mediated by caspase-8 and -10	1	14	0	1293988529144382	2493203852746667	5	5	4.89285e+11	9606	Homo sapiens	Mavs		R-HSA-933532;R-HSA-168934;R-HSA-933526;R-HSA-933539;R-HSA-933523
R-HSA-192905	vRNP Assembly	1	14	0	1293988529144382	2493203852746667	1	2	1.95714e+11	9606	Homo sapiens	Ipo5		R-HSA-192830
R-HSA-425381	Bicarbonate transporters	1	14	0	1293988529144382	2493203852746667	1	4	3.91428e+11	9606	Homo sapiens	Ahcyl2		R-HSA-8878664
R-HSA-8855121	VLDL interactions	2	29	0	3.38957e+16	2493203852746667	9	16	1.56571e+16	9606	Homo sapiens	Ap2b1;Vldlr		R-HSA-8855111;R-HSA-8855237;R-HSA-8854628;R-HSA-8854466;R-HSA-8855232;R-HSA-8854462;R-HSA-8855131;R-HSA-8855259;R-HSA-8855130
R-HSA-164952	The role of Nef in HIV-1 replication and disease pathogenesis	2	29	0	3.38957e+16	2493203852746667	9	20	1957138663274293	9606	Homo sapiens	Ap2b1;Ap1b1		R-HSA-167537;R-HSA-167601;R-HSA-182198;R-HSA-182279;R-HSA-182263;R-HSA-182186;R-HSA-182171;R-HSA-182286;R-HSA-167597
R-HSA-181430	Norepinephrine Neurotransmitter Release Cycle	2	30	0	3604421924964718	2493203852746667	3	6	5.87142e+11	9606	Homo sapiens	Stxbp1;Maoa		R-HSA-374899;R-HSA-374909;R-HSA-374922
R-HSA-171052	LDL-mediated lipid transport	2	30	0	3604421924964718	2493203852746667	10	22	2152852529601722	9606	Homo sapiens	Ap2b1;Ldlr		R-HSA-171106;R-HSA-171122;R-HSA-171059;R-HSA-6784738;R-HSA-171141;R-HSA-6784735;R-HSA-6784734;R-HSA-171118;R-HSA-171087;R-HSA-6784729
R-HSA-379401	Dopamine clearance from the synaptic cleft	1	15	0	1.37978e+16	2493203852746667	2	5	4.89285e+11	9606	Homo sapiens	Maoa		R-HSA-379382;R-HSA-379395
R-HSA-3000157	Laminin interactions	2	31	0	3824398911301108	2493203852746667	2	15	1.46785e+16	9606	Homo sapiens	Itga1;Itga7		R-HSA-216051;R-HSA-216058
R-HSA-112311	Neurotransmitter Clearance In The Synaptic Cleft	2	32	0	4.04938e+16	2493203852746667	4	10	9.78569e+11	9606	Homo sapiens	Maoa;Aldh2		R-HSA-141186;R-HSA-379382;R-HSA-380608;R-HSA-379395
R-HSA-77305	Beta oxidation of palmitoyl-CoA to myristoyl-CoA	1	16	0	1.46474e+16	2493203852746667	3	4	3.91428e+11	9606	Homo sapiens	Hadh		R-HSA-77301;R-HSA-77303;R-HSA-77304
R-HSA-77285	Beta oxidation of myristoyl-CoA to lauroyl-CoA	1	16	0	1.46474e+16	2493203852746667	3	4	3.91428e+11	9606	Homo sapiens	Hadh		R-HSA-77283;R-HSA-77271;R-HSA-77277
R-HSA-2691230	Signaling by NOTCH1 HD Domain Mutants in Cancer	1	16	0	1.46474e+16	2493203852746667	1	6	5.87142e+11	9606	Homo sapiens	Adam10		R-HSA-2730752
R-HSA-1247673	Erythrocytes take up oxygen and release carbon dioxide	1	16	0	1.46474e+16	2493203852746667	1	6	5.87142e+11	9606	Homo sapiens	Ca1		R-HSA-1475436
R-HSA-2691232	Constitutive Signaling by NOTCH1 HD Domain Mutants	1	16	0	1.46474e+16	2493203852746667	1	6	5.87142e+11	9606	Homo sapiens	Adam10		R-HSA-2730752
R-HSA-75892	Platelet Adhesion to exposed collagen	1	16	0	1.46474e+16	2493203852746667	1	6	5.87142e+11	9606	Homo sapiens	Itga1		R-HSA-114563
R-HSA-193144	Estrogen biosynthesis	1	16	0	1.46474e+16	2493203852746667	1	7	6.84999e+11	9606	Homo sapiens	Akr1b1		R-HSA-5696822
R-HSA-380320	Recruitment of NuMA to mitotic centrosomes	2	33	0	4279250930485157	2493203852746667	2	3	2.93571e+12	9606	Homo sapiens	Tuba4a		R-HSA-380508;R-HSA-380316
R-HSA-190828	Gap junction trafficking	3	50	0	1.37684e+16	2493203852746667	6	20	1957138663274293	9606	Homo sapiens	Tuba4a;Dnm2		R-HSA-196017;R-HSA-190519;R-HSA-190520;R-HSA-191737;R-HSA-190877;R-HSA-190829
R-HSA-918233	TRAF3-dependent IRF activation pathway	1	17	0	1548866893484614	2493203852746667	4	9	8.80712e+11	9606	Homo sapiens	Mavs		R-HSA-918232;R-HSA-918229;R-HSA-918227;R-HSA-918225
R-HSA-199220	Vitamin B5 (pantothenate) metabolism	2	35	0	4753188110749251	2493203852746667	3	12	1.17428e+16	9606	Homo sapiens	Fas;Coasy		R-HSA-199202;R-HSA-196754;R-HSA-196773
R-HSA-5626467	RHO GTPases activate IQGAPs	2	35	0	4753188110749251	2493203852746667	1	5	4.89285e+11	9606	Homo sapiens	Tuba4a		R-HSA-5672329
R-HSA-418360	Platelet calcium homeostasis	2	35	0	4753188110749251	2493203852746667	1	8	7.82855e+11	9606	Homo sapiens	Atp2a1;Atp2a2		R-HSA-418365
R-HSA-936837	Ion transport by P-type ATPases	4	71	0	5642791502709965	1918549110921388	4	14	1369997064292005	9606	Homo sapiens	Atp1b3;Atp2a1;Atp2a2;Atp7a		R-HSA-427910;R-HSA-418365;R-HSA-936802;R-HSA-936897
R-HSA-157858	Gap junction trafficking and regulation	3	54	0	1.686e+16	2493203852746667	6	24	2.34857e+16	9606	Homo sapiens	Tuba4a;Dnm2		R-HSA-196017;R-HSA-190519;R-HSA-190520;R-HSA-191737;R-HSA-190877;R-HSA-190829
R-HSA-6814848	Glycerophospholipid catabolism	1	18	0	163216996526941	2493203852746667	1	7	6.84999e+11	9606	Homo sapiens	Gdpd1		R-HSA-6814766
R-HSA-1482798	Acyl chain remodeling of CL	1	18	0	163216996526941	2493203852746667	1	12	1.17428e+16	9606	Homo sapiens	Hadh		R-HSA-1482775
R-HSA-180585	Vif-mediated degradation of APOBEC3G	3	56	0	185396354179731	2493203852746667	3	4	3.91428e+11	9606	Homo sapiens	Psmd12;Cul5;Psmb9		R-HSA-180555;R-HSA-180603;R-HSA-180540
R-HSA-416700	Other semaphorin interactions	1	19	0	1714658219149502	2493203852746667	1	9	8.80712e+11	9606	Homo sapiens	Itga1		R-HSA-434990
R-HSA-190861	Gap junction assembly	2	39	0	5754706831702383	2493203852746667	3	16	1.56571e+16	9606	Homo sapiens	Tuba4a		R-HSA-190520;R-HSA-191737;R-HSA-190877
R-HSA-70171	Glycolysis	3	59	0	2.12273e+16	2493203852746667	3	12	1.17428e+16	9606	Homo sapiens	Eno3;Pfkm;Hk2		R-HSA-70467;R-HSA-70420;R-HSA-71660
R-HSA-5099900	WNT5A-dependent internalization of FZD4	1	20	0	1.79634e+16	2493203852746667	2	5	4.89285e+11	9606	Homo sapiens	Ap2b1		R-HSA-5138459;R-HSA-5138433
R-HSA-389661	Glyoxylate metabolism and glycine degradation	3	61	0	2.31315e+16	2493203852746667	1	14	1369997064292005	9606	Homo sapiens	Pdhx;Dbt;Dlat		R-HSA-6792572
R-HSA-8852276	The role of GTSE1 in G2/M progression after G2 checkpoint	4	82	0	9244133040260838	2.47903e+16	4	10	9.78569e+11	9606	Homo sapiens	Psmd12;Tuba4a;Psmb9		R-HSA-8852306;R-HSA-8852354;R-HSA-8852298;R-HSA-8852280
R-HSA-1660517	Synthesis of PIPs at the late endosome membrane	1	21	0	1.87722e+16	2493203852746667	3	6	5.87142e+11	9606	Homo sapiens	Vac14		R-HSA-1675866;R-HSA-1676020;R-HSA-1675910
R-HSA-196783	Coenzyme A biosynthesis	1	21	0	1.87722e+16	2493203852746667	2	7	6.84999e+11	9606	Homo sapiens	Coasy		R-HSA-196754;R-HSA-196773
R-HSA-5210891	Uptake and function of anthrax toxins	1	21	0	1.87722e+16	2493203852746667	1	19	1.85928e+16	9606	Homo sapiens	Map2k2		R-HSA-5211356
R-HSA-5578775	Ion homeostasis	3	64	0	2615639464063413	2493203852746667	2	15	1.46785e+16	9606	Homo sapiens	Atp1b3;Atp2a1;Atp2a2		R-HSA-427910;R-HSA-936897
R-HSA-1655829	Regulation of cholesterol biosynthesis by SREBP (SREBF)	4	86	0	1085423014761544	2493203852746667	5	52	5088560524513162	9606	Homo sapiens	Sqle;Fas;Sec24c		R-HSA-2426151;R-HSA-1655834;R-HSA-1655825;R-HSA-1655843;R-HSA-1655844
R-HSA-432720	Lysosome Vesicle Biogenesis	2	43	0	6822006831529892	2493203852746667	5	8	7.82855e+11	9606	Homo sapiens	Ap1b1;Dnm2		R-HSA-432706;R-HSA-432707;R-HSA-432688;R-HSA-5333658;R-HSA-432712
R-HSA-1268020	Mitochondrial protein import	3	65	0	2720961657052179	2493203852746667	5	13	1.27214e+16	9606	Homo sapiens	Timm10b;Tomm70a;Hspd1		R-HSA-1299475;R-HSA-1299478;R-HSA-1268022;R-HSA-1955380;R-HSA-1299480
R-HSA-70263	Gluconeogenesis	3	65	0	2720961657052179	2493203852746667	3	21	2.055e+16	9606	Homo sapiens	Mdh1;Mdh2;Eno3		R-HSA-71783;R-HSA-70494;R-HSA-198508
R-HSA-140179	Amine Oxidase reactions	1	22	0	1957312777019593	2493203852746667	1	6	5.87142e+11	9606	Homo sapiens	Maoa		R-HSA-141186
R-HSA-5205647	Mitophagy	1	22	0	1957312777019593	2493203852746667	1	8	7.82855e+11	9606	Homo sapiens	Tomm70a		R-HSA-5205661
R-HSA-5205685	Pink/Parkin Mediated Mitophagy	1	22	0	1957312777019593	2493203852746667	1	8	7.82855e+11	9606	Homo sapiens	Tomm70a		R-HSA-5205661
R-HSA-2979096	NOTCH2 Activation and Transmission of Signal to the Nucleus	1	22	0	1957312777019593	2493203852746667	1	11	1076426264800861	9606	Homo sapiens	Adam10		R-HSA-157629
R-HSA-70895	Branched-chain amino acid catabolism	3	69	0	3164626081966737	2493203852746667	5	26	2544280262256581	9606	Homo sapiens	Acad8;Ivd;Dbt		R-HSA-5693153;R-HSA-70745;R-HSA-70713;R-HSA-5693148;R-HSA-70859
R-HSA-70268	Pyruvate metabolism	2	46	0	7661709889628243	2493203852746667	3	11	1076426264800861	9606	Homo sapiens	Pdhx;Dlat		R-HSA-71397;R-HSA-203946;R-HSA-204169
R-HSA-163210	Formation of ATP by chemiosmotic coupling	1	23	0	2.03662e+16	2493203852746667	3	3	2.93571e+12	9606	Homo sapiens	Atp5j		R-HSA-164834;R-HSA-164832;R-HSA-164840
R-HSA-181429	Serotonin Neurotransmitter Release Cycle	1	23	0	2.03662e+16	2493203852746667	2	4	3.91428e+11	9606	Homo sapiens	Stxbp1		R-HSA-380901;R-HSA-380905
R-HSA-416993	Trafficking of GluR2-containing AMPA receptors	1	23	0	2.03662e+16	2493203852746667	1	3	2.93571e+12	9606	Homo sapiens	Ap2b1		R-HSA-416639
R-HSA-196108	Pregnenolone biosynthesis	1	23	0	2.03662e+16	2493203852746667	1	8	7.82855e+11	9606	Homo sapiens	Akr1b1		R-HSA-196060
R-HSA-2426168	Activation of gene expression by SREBF (SREBP)	3	70	0	3.28111e+16	2493203852746667	3	42	4109991192876015	9606	Homo sapiens	Sqle;Fas		R-HSA-2426151;R-HSA-1655843;R-HSA-1655844
R-HSA-77111	Synthesis of Ketone Bodies	1	24	0	2.11515e+16	2493203852746667	1	8	7.82855e+11	9606	Homo sapiens	Bdh1		R-HSA-73912
R-HSA-211733	Regulation of activated PAK-2p34 by proteasome mediated degradation	2	50	0	8828666311976241	2493203852746667	1	2	1.95714e+11	9606	Homo sapiens	Psmd12;Psmb9		R-HSA-211715
R-HSA-5620916	VxPx cargo-targeting to cilium	1	25	0	2192914144772331	2493203852746667	9	10	9.78569e+11	9606	Homo sapiens	Pkd2		R-HSA-5623525;R-HSA-5623524;R-HSA-5623527;R-HSA-5620918;R-HSA-5623521;R-HSA-5620914;R-HSA-5623519;R-HSA-5620921;R-HSA-5623513
R-HSA-445144	Signal transduction by L1	1	25	0	2192914144772331	2493203852746667	1	11	1076426264800861	9606	Homo sapiens	Map2k2		R-HSA-109862
R-HSA-350562	Regulation of ornithine decarboxylase (ODC)	2	52	0	9430789990419640	2493203852746667	1	4	3.91428e+11	9606	Homo sapiens	Psmd12;Psmb9		R-HSA-353125
R-HSA-8864260	Transcriptional regulation by the AP-2 (TFAP2) family of transcription factors	2	52	0	9430789990419640	2493203852746667	2	44	4305705059203444	9606	Homo sapiens	Hspd1		R-HSA-8869558;R-HSA-8869542
R-HSA-264642	Acetylcholine Neurotransmitter Release Cycle	1	26	0	2269915893451132	2493203852746667	2	6	5.87142e+11	9606	Homo sapiens	Stxbp1		R-HSA-372529;R-HSA-372505
R-HSA-166208	mTORC1-mediated signalling	1	26	0	2269915893451132	2493203852746667	2	7	6.84999e+11	9606	Homo sapiens	Lamtor5		R-HSA-165718;R-HSA-165692
R-HSA-1480926	O2/CO2 exchange in erythrocytes	1	26	0	2269915893451132	2493203852746667	2	13	1.27214e+16	9606	Homo sapiens	Ca1		R-HSA-1475436;R-HSA-1475435
R-HSA-5652084	Fructose metabolism	1	26	0	2269915893451132	2493203852746667	1	7	6.84999e+11	9606	Homo sapiens	Akr1b1		R-HSA-5652172
R-HSA-1237044	Erythrocytes take up carbon dioxide and release oxygen	1	26	0	2269915893451132	2493203852746667	1	7	6.84999e+11	9606	Homo sapiens	Ca1		R-HSA-1475435
R-HSA-2022377	Metabolism of Angiotensinogen to Angiotensins	1	26	0	2269915893451132	2493203852746667	2	17	1663567863783149	9606	Homo sapiens	Ctsd		R-HSA-2022412;R-HSA-2022403
R-HSA-210991	Basigin interactions	1	26	0	2269915893451132	2493203852746667	1	10	9.78569e+11	9606	Homo sapiens	Atp1b3		R-HSA-375133
R-HSA-69017	CDK-mediated phosphorylation and removal of Cdc6	2	53	0	973620534049554	2493203852746667	1	4	3.91428e+11	9606	Homo sapiens	Psmd12;Psmb9		R-HSA-69016
R-HSA-75815	Ubiquitin-dependent degradation of Cyclin D	2	53	0	973620534049554	2493203852746667	1	5	4.89285e+11	9606	Homo sapiens	Psmd12;Psmb9		R-HSA-75825
R-HSA-180534	Vpu mediated degradation of CD4	2	53	0	973620534049554	2493203852746667	1	5	4.89285e+11	9606	Homo sapiens	Psmd12;Psmb9		R-HSA-180573
R-HSA-69229	Ubiquitin-dependent degradation of Cyclin D1	2	53	0	973620534049554	2493203852746667	1	5	4.89285e+11	9606	Homo sapiens	Psmd12;Psmb9		R-HSA-75825
R-HSA-1236978	Cross-presentation of soluble exogenous antigens (endosomes)	2	53	0	973620534049554	2493203852746667	1	6	5.87142e+11	9606	Homo sapiens	Psmd12;Psmb9		R-HSA-1236970
R-HSA-3928665	EPH-ephrin mediated repulsion of cells	2	54	0	1.00444e+16	2493203852746667	2	9	8.80712e+11	9606	Homo sapiens	Ap2b1;Adam10		R-HSA-3928654;R-HSA-3928660
R-HSA-75876	Synthesis of very long-chain fatty acyl-CoAs	2	54	0	1.00444e+16	2493203852746667	3	14	1369997064292005	9606	Homo sapiens	Tecr;Acsl3		R-HSA-548843;R-HSA-548831;R-HSA-201035
R-HSA-169911	Regulation of Apoptosis	2	54	0	1.00444e+16	2493203852746667	1	5	4.89285e+11	9606	Homo sapiens	Psmd12;Psmb9		R-HSA-211715
R-HSA-349425	Autodegradation of the E3 ubiquitin ligase COP1	2	54	0	1.00444e+16	2493203852746667	1	5	4.89285e+11	9606	Homo sapiens	Psmd12;Psmb9		R-HSA-264458
R-HSA-74182	Ketone body metabolism	1	27	0	2.34616e+16	2493203852746667	2	11	1076426264800861	9606	Homo sapiens	Bdh1		R-HSA-73920;R-HSA-73912
R-HSA-8854050	FBXL7 down-regulates AURKA during mitotic entry and in early mitosis	2	55	0	1.03553e+16	2493203852746667	2	6	5.87142e+11	9606	Homo sapiens	Psmd12;Psmb9		R-HSA-8854071;R-HSA-8854044
R-HSA-174113	SCF-beta-TrCP mediated degradation of Emi1	2	55	0	1.03553e+16	2493203852746667	1	3	2.93571e+12	9606	Homo sapiens	Psmd12;Psmb9		R-HSA-174203
R-HSA-69601	Ubiquitin Mediated Degradation of Phosphorylated Cdc25A	2	55	0	1.03553e+16	2493203852746667	1	5	4.89285e+11	9606	Homo sapiens	Psmd12;Psmb9		R-HSA-69600
R-HSA-69610	p53-Independent DNA Damage Response	2	55	0	1.03553e+16	2493203852746667	1	6	5.87142e+11	9606	Homo sapiens	Psmd12;Psmb9		R-HSA-69600
R-HSA-69613	p53-Independent G1/S DNA damage checkpoint	2	55	0	1.03553e+16	2493203852746667	1	6	5.87142e+11	9606	Homo sapiens	Psmd12;Psmb9		R-HSA-69600
R-HSA-6811436	COPI-independent Golgi-to-ER retrograde traffic	2	56	0	1066885185662294	2493203852746667	2	7	6.84999e+11	9606	Homo sapiens	Tuba4a		R-HSA-8849350;R-HSA-8849353
R-HSA-450408	AUF1 (hnRNP D0) binds and destabilizes mRNA	2	56	0	1066885185662294	2493203852746667	1	4	3.91428e+11	9606	Homo sapiens	Psmd12;Psmb9		R-HSA-450466
R-HSA-389957	Prefoldin mediated transfer of substrate to CCT/TriC	1	28	0	2421665780681076	2493203852746667	2	2	1.95714e+11	9606	Homo sapiens	Tuba4a		R-HSA-389970;R-HSA-389980
R-HSA-212676	Dopamine Neurotransmitter Release Cycle	1	28	0	2421665780681076	2493203852746667	2	5	4.89285e+11	9606	Homo sapiens	Stxbp1		R-HSA-380869;R-HSA-380574
R-HSA-77387	Insulin receptor recycling	1	28	0	2421665780681076	2493203852746667	2	6	5.87142e+11	9606	Homo sapiens	Atp6v1b2		R-HSA-74723;R-HSA-5252133
R-HSA-112409	RAF-independent MAPK1/3 activation	1	28	0	2421665780681076	2493203852746667	3	12	1.17428e+16	9606	Homo sapiens	Map2k2		R-HSA-109858;R-HSA-109862;R-HSA-109864
R-HSA-71384	Ethanol oxidation	1	28	0	2421665780681076	2493203852746667	1	8	7.82855e+11	9606	Homo sapiens	Aldh2		R-HSA-71723
R-HSA-4641258	Degradation of DVL	2	57	0	1098492721508646	2493203852746667	2	7	6.84999e+11	9606	Homo sapiens	Psmd12;Psmb9		R-HSA-1504193;R-HSA-4641260
R-HSA-4641257	Degradation of AXIN	2	57	0	1098492721508646	2493203852746667	2	8	7.82855e+11	9606	Homo sapiens	Psmd12;Psmb9		R-HSA-3640874;R-HSA-4641256
R-HSA-69541	Stabilization of p53	2	57	0	1098492721508646	2493203852746667	1	15	1.46785e+16	9606	Homo sapiens	Psmd12;Psmb9		R-HSA-264458
R-HSA-71406	Pyruvate metabolism and Citric Acid (TCA) cycle	3	87	0	5593787827627583	2493203852746667	5	29	2.83785e+16	9606	Homo sapiens	Pdhx;Mdh1;Mdh2;Dlat		R-HSA-70979;R-HSA-71397;R-HSA-71783;R-HSA-203946;R-HSA-204169
R-HSA-389960	Formation of tubulin folding intermediates by CCT/TriC	1	29	0	2.49643e+16	2.49643e+16	2	2	1.95714e+11	9606	Homo sapiens	Tuba4a		R-HSA-389954;R-HSA-389961
R-HSA-1660516	Synthesis of PIPs at the early endosome membrane	1	29	0	2.49643e+16	2.49643e+16	2	9	8.80712e+11	9606	Homo sapiens	Vac14		R-HSA-1676168;R-HSA-1676174
R-HSA-68827	CDT1 association with the CDC6:ORC:origin complex	2	59	0	1.16244e+16	2493203852746667	1	3	2.93571e+12	9606	Homo sapiens	Psmd12;Psmb9		R-HSA-68825
R-HSA-933542	TRAF6 mediated NF-kB activation	1	30	0	2.57046e+16	2.57046e+16	2	4	3.91428e+11	9606	Homo sapiens	Mavs		R-HSA-933530;R-HSA-933528
R-HSA-5673000	RAF activation	1	30	0	2.57046e+16	2.57046e+16	1	10	9.78569e+11	9606	Homo sapiens	Map2k2		R-HSA-5672969
R-HSA-71336	Pentose phosphate pathway (hexose monophosphate shunt)	1	30	0	2.57046e+16	2.57046e+16	1	15	1.46785e+16	9606	Homo sapiens	Pgm1		R-HSA-6787329
R-HSA-8863678	Neurodegenerative Diseases	1	30	0	2.57046e+16	2.57046e+16	1	22	2152852529601722	9606	Homo sapiens	Prdx1		R-HSA-8868567
R-HSA-8862803	Deregulated CDK5 triggers multiple neurodegenerative pathways in Alzheimer's disease models	1	30	0	2.57046e+16	2.57046e+16	1	22	2152852529601722	9606	Homo sapiens	Prdx1		R-HSA-8868567
R-HSA-432722	Golgi Associated Vesicle Biogenesis	2	61	0	1.22731e+16	2493203852746667	4	7	6.84999e+11	9606	Homo sapiens	Ap1b1;Dnm2		R-HSA-421831;R-HSA-421836;R-HSA-421835;R-HSA-421833
R-HSA-5362768	Hh mutants that don't undergo autocatalytic processing are degraded by ERAD	2	61	0	1.22731e+16	2493203852746667	1	6	5.87142e+11	9606	Homo sapiens	Psmd12;Psmb9		R-HSA-5387392
R-HSA-5676590	NIK-->noncanonical NF-kB signaling	2	61	0	1.22731e+16	2493203852746667	1	9	8.80712e+11	9606	Homo sapiens	Psmd12;Psmb9		R-HSA-5607731
R-HSA-5610780	Degradation of GLI1 by the proteasome	2	62	0	1.26007e+16	2493203852746667	2	6	5.87142e+11	9606	Homo sapiens	Psmd12;Psmb9		R-HSA-5610758;R-HSA-5610760
R-HSA-5610783	Degradation of GLI2 by the proteasome	2	62	0	1.26007e+16	2493203852746667	1	5	4.89285e+11	9606	Homo sapiens	Psmd12;Psmb9		R-HSA-5610757
R-HSA-5610785	GLI3 is processed to GLI3R by the proteasome	2	62	0	1.26007e+16	2493203852746667	1	5	4.89285e+11	9606	Homo sapiens	Psmd12;Psmb9		R-HSA-5610754
R-HSA-187577	SCF(Skp2)-mediated degradation of p27/p21	2	62	0	1.26007e+16	2493203852746667	1	7	6.84999e+11	9606	Homo sapiens	Psmd12;Psmb9		R-HSA-187574
R-HSA-210500	Glutamate Neurotransmitter Release Cycle	1	31	0	2643765318891803	2643765318891803	2	8	7.82855e+11	9606	Homo sapiens	Stxbp1		R-HSA-210426;R-HSA-210430
R-HSA-2122948	Activated NOTCH1 Transmits Signal to the Nucleus	1	31	0	2643765318891803	2643765318891803	1	21	2.055e+16	9606	Homo sapiens	Adam10		R-HSA-157632
R-HSA-174084	Autodegradation of Cdh1 by Cdh1:APC/C	2	63	0	1.29304e+16	2493203852746667	1	2	1.95714e+11	9606	Homo sapiens	Psmd12;Psmb9		R-HSA-174058
R-HSA-174824	Lipoprotein metabolism	3	96	0	7060568925869637	2493203852746667	23	84	821998238575203	9606	Homo sapiens	Ap2b1;Ldlr;Vldlr		R-HSA-8855111;R-HSA-171106;R-HSA-8855237;R-HSA-174624;R-HSA-8854628;R-HSA-174657;R-HSA-8854466;R-HSA-6784738;R-HSA-8855232;R-HSA-171141;R-HSA-171118;R-HSA-171087;R-HSA-174706;R-HSA-171122;R-HSA-171059;R-HSA-6784735;R-HSA-8854462;R-HSA-6784734;R-HSA-174808;R-HSA-8855131;R-HSA-8855259;R-HSA-8855130;R-HSA-6784729
R-HSA-5387390	Hh mutants abrogate ligand secretion	2	64	0	1326213372444146	2493203852746667	1	7	6.84999e+11	9606	Homo sapiens	Psmd12;Psmb9		R-HSA-5387392
R-HSA-1660514	Synthesis of PIPs at the Golgi membrane	1	32	0	2.71635e+16	2.71635e+16	2	11	1076426264800861	9606	Homo sapiens	Vac14		R-HSA-1675921;R-HSA-1676005
R-HSA-4086400	PCP/CE pathway	3	99	0	7584373169801073	2493203852746667	3	24	2.34857e+16	9606	Homo sapiens	Psmd12;Ap2b1;Psmb9		R-HSA-4608855;R-HSA-5138459;R-HSA-5138433
R-HSA-4608870	Asymmetric localization of PCP proteins	2	66	0	1393133131781713	2493203852746667	1	7	6.84999e+11	9606	Homo sapiens	Psmd12;Psmb9		R-HSA-4608855
R-HSA-5607761	Dectin-1 mediated noncanonical NF-kB signaling	2	66	0	1393133131781713	2493203852746667	1	9	8.80712e+11	9606	Homo sapiens	Psmd12;Psmb9		R-HSA-5607731
R-HSA-901032	ER Quality Control Compartment (ERQC)	1	33	0	2.78823e+16	2.78823e+16	1	9	8.80712e+11	9606	Homo sapiens	Uggt1		R-HSA-548884
R-HSA-5357769	Caspase activation via extrinsic apoptotic signalling pathway	1	33	0	2.78823e+16	2.78823e+16	1	17	1663567863783149	9606	Homo sapiens	Dapk3		R-HSA-418849
R-HSA-174154	APC/C:Cdc20 mediated degradation of Securin	2	67	0	1.42687e+16	2493203852746667	1	3	2.93571e+12	9606	Homo sapiens	Psmd12;Psmb9		R-HSA-174202
R-HSA-983189	Kinesins	2	67	0	1.42687e+16	2493203852746667	2	14	1369997064292005	9606	Homo sapiens	Tuba4a		R-HSA-983259;R-HSA-983266
R-HSA-5678895	Defective CFTR causes cystic fibrosis	2	67	0	1.42687e+16	2493203852746667	1	7	6.84999e+11	9606	Homo sapiens	Psmd12;Psmb9		R-HSA-8866858
R-HSA-196071	Metabolism of steroid hormones	2	67	0	1.42687e+16	2493203852746667	2	36	3.52285e+16	9606	Homo sapiens	Akr1b1		R-HSA-5696822;R-HSA-196060
R-HSA-75105	Fatty Acyl-CoA Biosynthesis	3	101	0	794288708887192	2493203852746667	6	29	2.83785e+16	9606	Homo sapiens	Tecr;Fas;Acsl3		R-HSA-75872;R-HSA-548843;R-HSA-5655955;R-HSA-548831;R-HSA-201035;R-HSA-163756
R-HSA-68867	Assembly of the pre-replicative complex	2	68	0	146077475409917	2493203852746667	1	12	1.17428e+16	9606	Homo sapiens	Psmd12;Psmb9		R-HSA-68825
R-HSA-69563	p53-Dependent G1 DNA Damage Response	2	68	0	146077475409917	2493203852746667	1	22	2152852529601722	9606	Homo sapiens	Psmd12;Psmb9		R-HSA-264458
R-HSA-69580	p53-Dependent G1/S DNA damage checkpoint	2	68	0	146077475409917	2493203852746667	1	22	2152852529601722	9606	Homo sapiens	Psmd12;Psmb9		R-HSA-264458
R-HSA-1442490	Collagen degradation	2	69	0	1.49485e+16	2493203852746667	2	34	3327135727566298	9606	Homo sapiens	Ctsd;Adam10		R-HSA-2471621;R-HSA-2168960
R-HSA-5658442	Regulation of RAS by GAPs	2	70	0	1529084890644985	2493203852746667	1	5	4.89285e+11	9606	Homo sapiens	Psmd12;Psmb9		R-HSA-5658430
R-HSA-191273	Cholesterol biosynthesis	2	70	0	1529084890644985	2493203852746667	3	31	3033564928075154	9606	Homo sapiens	Sqle;Msmo1		R-HSA-191299;R-HSA-194641;R-HSA-194669
R-HSA-1234176	Oxygen-dependent proline hydroxylation of Hypoxia-inducible Factor Alpha	2	70	0	1529084890644985	2493203852746667	1	12	1.17428e+16	9606	Homo sapiens	Psmd12;Psmb9		R-HSA-1234159
R-HSA-69615	G1/S DNA Damage Checkpoints	2	70	0	1529084890644985	2493203852746667	2	28	273999412858401	9606	Homo sapiens	Psmd12;Psmb9		R-HSA-69600;R-HSA-264458
R-HSA-5362517	Signaling by Retinoic Acid	2	70	0	1529084890644985	2493203852746667	1	21	2.055e+16	9606	Homo sapiens	Pdhx;Dlat		R-HSA-203946
R-HSA-933541	TRAF6 mediated IRF7 activation	1	35	0	2929881343494838	2929881343494838	5	11	1076426264800861	9606	Homo sapiens	Mavs		R-HSA-918230;R-HSA-933527;R-HSA-933525;R-HSA-933538;R-HSA-933537
R-HSA-380972	Energy dependent regulation of mTOR by LKB1-AMPK	1	35	0	2929881343494838	2929881343494838	2	7	6.84999e+11	9606	Homo sapiens	Lamtor5		R-HSA-447074;R-HSA-380979
R-HSA-888590	GABA synthesis, release, reuptake and degradation	1	35	0	2929881343494838	2929881343494838	2	9	8.80712e+11	9606	Homo sapiens	Stxbp1		R-HSA-888589;R-HSA-917744
R-HSA-75109	Triglyceride Biosynthesis	4	142	0	5327142057147349	2493203852746667	7	39	3816420393384871	9606	Homo sapiens	Tecr;Fas;Acsl3;Gpd1l		R-HSA-75889;R-HSA-75872;R-HSA-548843;R-HSA-5655955;R-HSA-548831;R-HSA-201035;R-HSA-163756
R-HSA-380284	Loss of proteins required for interphase microtubule organization from the centrosome	2	71	0	1563474469305529	2493203852746667	3	3	2.93571e+12	9606	Homo sapiens	Tuba4a		R-HSA-380294;R-HSA-380272;R-HSA-380303
R-HSA-380259	Loss of Nlp from mitotic centrosomes	2	71	0	1563474469305529	2493203852746667	2	2	1.95714e+11	9606	Homo sapiens	Tuba4a		R-HSA-380272;R-HSA-380303
R-HSA-8856825	Cargo recognition for clathrin-mediated endocytosis	3	108	0	9254168077205248	2493203852746667	4	14	1369997064292005	9606	Homo sapiens	Scarb2;Ap2b1;Ldlr		R-HSA-8866279;R-HSA-8866277;R-HSA-8863471;R-HSA-8866283
R-HSA-174178	APC/C:Cdh1 mediated degradation of Cdc20 and other APC/C:Cdh1 targeted proteins in late mitosis/early G1	2	72	0	1.59801e+16	2493203852746667	2	4	3.91428e+11	9606	Homo sapiens	Psmd12;Psmb9		R-HSA-174105;R-HSA-188191
R-HSA-174184	Cdc20:Phospho-APC/C mediated degradation of Cyclin A	2	72	0	1.59801e+16	2493203852746667	1	3	2.93571e+12	9606	Homo sapiens	Psmd12;Psmb9		R-HSA-174255
R-HSA-1169091	Activation of NF-kappaB in B cells	2	72	0	1.59801e+16	2493203852746667	1	10	9.78569e+11	9606	Homo sapiens	Psmd12;Psmb9		R-HSA-1168640
R-HSA-5358346	Hedgehog ligand biogenesis	2	72	0	1.59801e+16	2493203852746667	1	15	1.46785e+16	9606	Homo sapiens	Psmd12;Psmb9		R-HSA-5362448
R-HSA-389958	Cooperation of Prefoldin and TriC/CCT in actin and tubulin folding	1	36	0	2999667697875361	2999667697875361	4	6	5.87142e+11	9606	Homo sapiens	Tuba4a		R-HSA-389954;R-HSA-389970;R-HSA-389980;R-HSA-389961
R-HSA-174800	Chylomicron-mediated lipid transport	1	36	0	2999667697875361	2999667697875361	4	20	1957138663274293	9606	Homo sapiens	Ldlr		R-HSA-174706;R-HSA-174624;R-HSA-174657;R-HSA-174808
R-HSA-8863795	Downregulation of ERBB2 signaling	1	36	0	2999667697875361	2999667697875361	1	14	1369997064292005	9606	Homo sapiens	Cul5		R-HSA-1918095
R-HSA-68949	Orc1 removal from chromatin	2	73	0	1632691236608117	2493203852746667	1	4	3.91428e+11	9606	Homo sapiens	Psmd12;Psmb9		R-HSA-68948
R-HSA-69052	Switching of origins to a post-replicative state	2	73	0	1632691236608117	2493203852746667	2	9	8.80712e+11	9606	Homo sapiens	Psmd12;Psmb9		R-HSA-68948;R-HSA-69016
R-HSA-179419	APC:Cdc20 mediated degradation of cell cycle proteins prior to satisfation of the cell cycle checkpoint	2	73	0	1632691236608117	2493203852746667	1	6	5.87142e+11	9606	Homo sapiens	Psmd12;Psmb9		R-HSA-174255
R-HSA-8854518	AURKA Activation by TPX2	2	74	0	1.66751e+16	2493203852746667	2	2	1.95714e+11	9606	Homo sapiens	Tuba4a		R-HSA-8853405;R-HSA-8853419
R-HSA-936440	Negative regulators of RIG-I/MDA5 signaling	1	37	0	3.06877e+16	3.06877e+16	6	13	1.27214e+16	9606	Homo sapiens	Mavs		R-HSA-990526;R-HSA-936381;R-HSA-936378;R-HSA-936475;R-HSA-936564;R-HSA-990528
R-HSA-5694530	Cargo concentration in the ER	1	37	0	3.06877e+16	3.06877e+16	4	12	1.17428e+16	9606	Homo sapiens	Sec24c		R-HSA-5694436;R-HSA-5694435;R-HSA-5694413;R-HSA-5694522
R-HSA-399719	Trafficking of AMPA receptors	1	37	0	3.06877e+16	3.06877e+16	1	4	3.91428e+11	9606	Homo sapiens	Ap2b1		R-HSA-416639
R-HSA-917977	Transferrin endocytosis and recycling	1	37	0	3.06877e+16	3.06877e+16	2	9	8.80712e+11	9606	Homo sapiens	Atp6v1b2		R-HSA-5252133;R-HSA-917841
R-HSA-1980145	Signaling by NOTCH2	1	37	0	3.06877e+16	3.06877e+16	1	20	1957138663274293	9606	Homo sapiens	Adam10		R-HSA-157629
R-HSA-69300	Removal of licensing factors from origins	2	75	0	1.70245e+16	2493203852746667	2	11	1076426264800861	9606	Homo sapiens	Psmd12;Psmb9		R-HSA-68948;R-HSA-69016
R-HSA-176409	APC/C:Cdc20 mediated degradation of mitotic proteins	2	75	0	1.70245e+16	2493203852746667	2	13	1.27214e+16	9606	Homo sapiens	Psmd12;Psmb9		R-HSA-174202;R-HSA-174255
R-HSA-975634	Retinoid metabolism and transport	2	75	0	1.70245e+16	2493203852746667	2	27	2.64214e+16	9606	Homo sapiens	Ldlr;Akr1b1		R-HSA-2424254;R-HSA-2855252
R-HSA-69656	Cyclin A:Cdk2-associated events at S phase entry	2	75	0	1.70245e+16	2493203852746667	1	18	1.76142e+16	9606	Homo sapiens	Psmd12;Psmb9		R-HSA-187574
R-HSA-176814	Activation of APC/C and APC/C:Cdc20 mediated degradation of mitotic proteins	2	76	0	1.73752e+16	2493203852746667	2	15	1.46785e+16	9606	Homo sapiens	Psmd12;Psmb9		R-HSA-174202;R-HSA-174255
R-HSA-69202	Cyclin E associated events during G1/S transition	2	76	0	1.73752e+16	2493203852746667	1	20	1957138663274293	9606	Homo sapiens	Psmd12;Psmb9		R-HSA-187574
R-HSA-1912422	Pre-NOTCH Expression and Processing	2	76	0	1.73752e+16	2493203852746667	1	30	2.93571e+16	9606	Homo sapiens	Atp2a1;Atp2a2		R-HSA-1912374
R-HSA-8856828	Clathrin-mediated endocytosis	4	154	0	6749305464223265	2493203852746667	23	34	3327135727566298	9606	Homo sapiens	Scarb2;Ap2b1;Ldlr;Dnm2		R-HSA-8868071;R-HSA-8866279;R-HSA-8868230;R-HSA-8866277;R-HSA-8863471;R-HSA-8856813;R-HSA-8867756;R-HSA-8868236;R-HSA-8868651;R-HSA-8866283;R-HSA-8867754;R-HSA-8856808;R-HSA-8862280;R-HSA-8868648;R-HSA-8868072;R-HSA-8868661;R-HSA-8868660;R-HSA-8868659;R-HSA-8868658;R-HSA-8869438;R-HSA-8871196;R-HSA-8871194;R-HSA-8871193
R-HSA-69304	Regulation of DNA replication	2	78	0	1.80801e+16	2493203852746667	2	14	1369997064292005	9606	Homo sapiens	Psmd12;Psmb9		R-HSA-68948;R-HSA-69016
R-HSA-399721	Glutamate Binding, Activation of AMPA Receptors and Synaptic Plasticity	1	39	0	3204951993783074	3204951993783074	1	9	8.80712e+11	9606	Homo sapiens	Ap2b1		R-HSA-416639
R-HSA-5609975	Diseases associated with glycosylation precursor biosynthesis	1	39	0	3204951993783074	3204951993783074	1	16	1.56571e+16	9606	Homo sapiens	Pgm1		R-HSA-5609939
R-HSA-199992	trans-Golgi Network Vesicle Budding	2	80	0	1878918249232724	2493203852746667	9	19	1.85928e+16	9606	Homo sapiens	Ap1b1;Dnm2		R-HSA-421831;R-HSA-432706;R-HSA-432707;R-HSA-432688;R-HSA-421836;R-HSA-5333658;R-HSA-421835;R-HSA-432712;R-HSA-421833
R-HSA-421837	Clathrin derived vesicle budding	2	80	0	1878918249232724	2493203852746667	9	19	1.85928e+16	9606	Homo sapiens	Ap1b1;Dnm2		R-HSA-421831;R-HSA-432706;R-HSA-432707;R-HSA-432688;R-HSA-421836;R-HSA-5333658;R-HSA-421835;R-HSA-432712;R-HSA-421833
R-HSA-5610787	Hedgehog 'off' state	3	123	0	1233573637044928	2493203852746667	6	32	3131421861238869	9606	Homo sapiens	Psmd12;Tuba4a;Psmb9		R-HSA-5610757;R-HSA-5610758;R-HSA-5610754;R-HSA-5610733;R-HSA-5610767;R-HSA-5610760
R-HSA-176408	Regulation of APC/C activators between G1/S and early anaphase	2	82	0	1950215699522655	2493203852746667	1	14	1369997064292005	9606	Homo sapiens	Psmd12;Psmb9		R-HSA-174203
R-HSA-901042	Calnexin/calreticulin cycle	1	41	0	3.33848e+16	3.33848e+16	1	13	1.27214e+16	9606	Homo sapiens	Uggt1		R-HSA-548884
R-HSA-5689896	Ovarian tumor domain proteases	1	41	0	3.33848e+16	3.33848e+16	1	13	1.27214e+16	9606	Homo sapiens	Mavs		R-HSA-936381
R-HSA-5628897	TP53 Regulates Metabolic Genes	3	124	0	1.25532e+16	2493203852746667	4	34	3327135727566298	9606	Homo sapiens	Lamtor5;Prdx5;Prdx1		R-HSA-380979;R-HSA-5631885;R-HSA-5631903;R-HSA-3341343
R-HSA-5633008	TP53 Regulates Transcription of Cell Death Genes	2	83	0	1985995374194537	2493203852746667	2	68	6654271455132596	9606	Homo sapiens	Fas		R-HSA-6799815;R-HSA-6800001
R-HSA-1234174	Regulation of Hypoxia-inducible Factor (HIF) by oxygen	2	84	0	2021855529207779	2493203852746667	1	20	1957138663274293	9606	Homo sapiens	Psmd12;Psmb9		R-HSA-1234159
R-HSA-2262749	Cellular response to hypoxia	2	84	0	2021855529207779	2493203852746667	1	20	1957138663274293	9606	Homo sapiens	Psmd12;Psmb9		R-HSA-1234159
R-HSA-216083	Integrin cell surface interactions	2	87	0	2.12987e+16	2493203852746667	7	55	5382131324004306	9606	Homo sapiens	Itga1;Itga7		R-HSA-2484965;R-HSA-4084910;R-HSA-114563;R-HSA-2467436;R-HSA-216040;R-HSA-2327695;R-HSA-4084912
R-HSA-1445148	Translocation of GLUT4 to the plasma membrane	2	87	0	2.12987e+16	2493203852746667	1	15	1.46785e+16	9606	Homo sapiens	Tuba4a		R-HSA-2316347
R-HSA-69002	DNA Replication Pre-Initiation	2	88	0	2166002261368467	2493203852746667	1	20	1957138663274293	9606	Homo sapiens	Psmd12;Psmb9		R-HSA-68825
R-HSA-68874	M/G1 Transition	2	88	0	2166002261368467	2493203852746667	1	20	1957138663274293	9606	Homo sapiens	Psmd12;Psmb9		R-HSA-68825
R-HSA-453276	Regulation of mitotic cell cycle	2	90	0	2238432660070635	2493203852746667	6	38	3.71856e+16	9606	Homo sapiens	Psmd12;Psmb9		R-HSA-174202;R-HSA-174058;R-HSA-174203;R-HSA-174105;R-HSA-188191;R-HSA-174255
R-HSA-174143	APC/C-mediated degradation of cell cycle proteins	2	90	0	2238432660070635	2493203852746667	6	38	3.71856e+16	9606	Homo sapiens	Psmd12;Psmb9		R-HSA-174202;R-HSA-174058;R-HSA-174203;R-HSA-174105;R-HSA-188191;R-HSA-174255
R-HSA-5632684	Hedgehog 'on' state	2	90	0	2238432660070635	2493203852746667	2	37	3620706527057442	9606	Homo sapiens	Psmd12;Psmb9		R-HSA-5635868;R-HSA-5635854
R-HSA-195253	Degradation of beta-catenin by the destruction complex	2	90	0	2238432660070635	2493203852746667	1	22	2152852529601722	9606	Homo sapiens	Psmd12;Psmb9		R-HSA-2130282
R-HSA-71403	Citric acid cycle (TCA cycle)	1	45	0	359776922170136	359776922170136	2	14	1369997064292005	9606	Homo sapiens	Mdh1;Mdh2		R-HSA-70979;R-HSA-71783
R-HSA-5675221	Negative regulation of MAPK pathway	1	45	0	359776922170136	359776922170136	1	12	1.17428e+16	9606	Homo sapiens	Map2k2		R-HSA-5674496
R-HSA-114608	Platelet degranulation	3	137	0	1.54993e+16	2493203852746667	2	11	1076426264800861	9606	Homo sapiens	Sccpdh;Tuba4a;Clu		R-HSA-482772;R-HSA-481007
R-HSA-2565942	Regulation of PLK1 Activity at G2/M Transition	2	92	0	2.31105e+16	2493203852746667	4	12	1.17428e+16	9606	Homo sapiens	Tuba4a		R-HSA-3000319;R-HSA-2574845;R-HSA-3000310;R-HSA-2574840
R-HSA-6802948	Signaling by high-kinase activity BRAF mutants	1	46	0	3661011508378239	3661011508378239	4	6	5.87142e+11	9606	Homo sapiens	Map2k2		R-HSA-6802912;R-HSA-6802911;R-HSA-6802910;R-HSA-6803227
R-HSA-450531	Regulation of mRNA stability by proteins that bind AU-rich elements	2	93	0	2.34742e+16	2493203852746667	1	26	2544280262256581	9606	Homo sapiens	Psmd12;Psmb9		R-HSA-450466
R-HSA-2467813	Separation of Sister Chromatids	4	188	0	1.17119e+16	2493203852746667	3	8	7.82855e+11	9606	Homo sapiens	Psmd12;Tuba4a;Psmb9		R-HSA-2467809;R-HSA-2467811;R-HSA-174202
R-HSA-5663220	RHO GTPases Activate Formins	3	141	0	1.64463e+16	2493203852746667	3	27	2.64214e+16	9606	Homo sapiens	Tuba4a;Rhod		R-HSA-5666088;R-HSA-5666104;R-HSA-5666169
R-HSA-6806667	Metabolism of fat-soluble vitamins	2	94	0	2.38383e+16	2493203852746667	2	43	420784812603973	9606	Homo sapiens	Ldlr;Akr1b1		R-HSA-2424254;R-HSA-2855252
R-HSA-5674135	MAP2K and MAPK activation	1	47	0	3723633872627703	3723633872627703	8	8	7.82855e+11	9606	Homo sapiens	Map2k2		R-HSA-5674132;R-HSA-5672980;R-HSA-5674373;R-HSA-5672978;R-HSA-5674130;R-HSA-5674366;R-HSA-5672972;R-HSA-5672973
R-HSA-6802946	Signaling by moderate kinase activity BRAF mutants	1	47	0	3723633872627703	3723633872627703	5	7	6.84999e+11	9606	Homo sapiens	Map2k2		R-HSA-6802919;R-HSA-6802916;R-HSA-6802914;R-HSA-6803230;R-HSA-6802921
R-HSA-165159	mTOR signalling	1	47	0	3723633872627703	3723633872627703	12	26	2544280262256581	9606	Homo sapiens	Lamtor5		R-HSA-5653974;R-HSA-165680;R-HSA-165718;R-HSA-447074;R-HSA-5653936;R-HSA-5653968;R-HSA-380979;R-HSA-377186;R-HSA-5672828;R-HSA-5672843;R-HSA-165692;R-HSA-5672824
R-HSA-76005	Response to elevated platelet cytosolic Ca2+	3	144	0	1.71678e+16	2493203852746667	2	14	1369997064292005	9606	Homo sapiens	Sccpdh;Tuba4a;Clu		R-HSA-482772;R-HSA-481007
R-HSA-6802955	Paradoxical activation of RAF signaling by kinase inactive BRAF	1	48	0	3785642344128548	3785642344128548	5	7	6.84999e+11	9606	Homo sapiens	Map2k2		R-HSA-6802918;R-HSA-6803234;R-HSA-6802943;R-HSA-6802942;R-HSA-6802941
R-HSA-380287	Centrosome maturation	2	97	0	2493203852746667	2493203852746667	8	9	8.80712e+11	9606	Homo sapiens	Tuba4a		R-HSA-380311;R-HSA-380455;R-HSA-380294;R-HSA-380272;R-HSA-380508;R-HSA-380316;R-HSA-380303;R-HSA-380283
R-HSA-380270	Recruitment of mitotic centrosome proteins and complexes	2	97	0	2493203852746667	2493203852746667	5	6	5.87142e+11	9606	Homo sapiens	Tuba4a		R-HSA-380311;R-HSA-380455;R-HSA-380508;R-HSA-380316;R-HSA-380283
R-HSA-1474228	Degradation of the extracellular matrix	3	146	0	1765375869987481	2493203852746667	4	103	1.00793e+16	9606	Homo sapiens	Ctsd;Adam10;Htra1		R-HSA-2471621;R-HSA-2168960;R-HSA-8855825;R-HSA-4224014
R-HSA-112310	Neurotransmitter Release Cycle	2	98	0	2.5297e+16	2.5297e+16	13	36	3.52285e+16	9606	Homo sapiens	Stxbp1;Maoa		R-HSA-888589;R-HSA-380901;R-HSA-380869;R-HSA-380905;R-HSA-374922;R-HSA-372529;R-HSA-374899;R-HSA-374909;R-HSA-210426;R-HSA-380574;R-HSA-372505;R-HSA-210430;R-HSA-917744
R-HSA-5689603	UCH proteinases	2	98	0	2.5297e+16	2.5297e+16	2	11	1076426264800861	9606	Homo sapiens	Psmd12;Psmb9		R-HSA-5665854;R-HSA-5665871
R-HSA-109703	PKB-mediated events	1	49	0	3.84704e+16	3.84704e+16	12	28	273999412858401	9606	Homo sapiens	Lamtor5		R-HSA-5653974;R-HSA-165680;R-HSA-165718;R-HSA-447074;R-HSA-5653936;R-HSA-5653968;R-HSA-380979;R-HSA-377186;R-HSA-5672828;R-HSA-5672843;R-HSA-165692;R-HSA-5672824
R-HSA-5620912	Anchoring of the basal body to the plasma membrane	2	99	0	2.56622e+16	2.56622e+16	8	9	8.80712e+11	9606	Homo sapiens	Tuba4a		R-HSA-5626228;R-HSA-5626227;R-HSA-5626220;R-HSA-5626223;R-HSA-5626681;R-HSA-5617816;R-HSA-5626699;R-HSA-5638009
R-HSA-6807878	COPI-mediated anterograde transport	2	100	0	260274500394329	260274500394329	2	12	1.17428e+16	9606	Homo sapiens	Tuba4a		R-HSA-6809006;R-HSA-6809003
R-HSA-5576891	Cardiac conduction	3	151	0	1888512396923705	2493203852746667	2	26	2544280262256581	9606	Homo sapiens	Atp1b3;Atp2a1;Atp2a2		R-HSA-427910;R-HSA-936897
R-HSA-68882	Mitotic Anaphase	4	202	0	1.41153e+16	2493203852746667	3	11	1076426264800861	9606	Homo sapiens	Psmd12;Tuba4a;Psmb9		R-HSA-2467809;R-HSA-2467811;R-HSA-174202
R-HSA-69275	G2/M Transition	4	202	0	1.41153e+16	2493203852746667	20	82	8024268519424602	9606	Homo sapiens	Psmd12;Tuba4a;Psmb9		R-HSA-380455;R-HSA-380294;R-HSA-8852354;R-HSA-380303;R-HSA-8853419;R-HSA-8852298;R-HSA-8854071;R-HSA-3000319;R-HSA-380311;R-HSA-380272;R-HSA-8852306;R-HSA-380508;R-HSA-380316;R-HSA-2574845;R-HSA-8853405;R-HSA-3000310;R-HSA-8854044;R-HSA-380283;R-HSA-2574840;R-HSA-8852280
R-HSA-2555396	Mitotic Metaphase and Anaphase	4	203	0	1429412245616528	2493203852746667	3	12	1.17428e+16	9606	Homo sapiens	Psmd12;Tuba4a;Psmb9		R-HSA-2467809;R-HSA-2467811;R-HSA-174202
R-HSA-453274	Mitotic G2-G2/M phases	4	204	0	1.44738e+16	2493203852746667	20	84	821998238575203	9606	Homo sapiens	Psmd12;Tuba4a;Psmb9		R-HSA-380455;R-HSA-380294;R-HSA-8852354;R-HSA-380303;R-HSA-8853419;R-HSA-8852298;R-HSA-8854071;R-HSA-3000319;R-HSA-380311;R-HSA-380272;R-HSA-8852306;R-HSA-380508;R-HSA-380316;R-HSA-2574845;R-HSA-8853405;R-HSA-3000310;R-HSA-8854044;R-HSA-380283;R-HSA-2574840;R-HSA-8852280
R-HSA-157118	Signaling by NOTCH	3	153	0	1.93838e+16	2493203852746667	5	95	9296408650552892	9606	Homo sapiens	Atp2a1;Adam10;Atp2a2		R-HSA-157632;R-HSA-157649;R-HSA-157626;R-HSA-1912374;R-HSA-157629
R-HSA-5619084	ABC transporter disorders	2	102	0	2.67581e+16	2.67581e+16	1	22	2152852529601722	9606	Homo sapiens	Psmd12;Psmb9		R-HSA-8866858
R-HSA-5689880	Ub-specific processing proteases	4	206	0	1.48359e+16	2493203852746667	2	40	3914277326548586	9606	Homo sapiens	Psmd12;Rhot1;Tomm70a;Psmb9		R-HSA-5689539;R-HSA-5696872
R-HSA-5668541	TNFR2 non-canonical NF-kB pathway	2	104	0	2.74888e+16	2.74888e+16	3	43	420784812603973	9606	Homo sapiens	Psmd12;Psmb9		R-HSA-5607731;R-HSA-5668481;R-HSA-5668520
R-HSA-1222556	ROS, RNS production in phagocytes	1	52	0	402765587122039	402765587122039	1	13	1.27214e+16	9606	Homo sapiens	Atp6v1b2		R-HSA-1222516
R-HSA-199977	ER to Golgi Anterograde Transport	3	157	0	2.0391e+16	2493203852746667	16	39	3816420393384871	9606	Homo sapiens	Tuba4a;Sec24c		R-HSA-5694421;R-HSA-5694418;R-HSA-203973;R-HSA-5694417;R-HSA-6809006;R-HSA-5694527;R-HSA-204008;R-HSA-6809003;R-HSA-5694522;R-HSA-5694439;R-HSA-5694436;R-HSA-5694435;R-HSA-5694446;R-HSA-5694413;R-HSA-5694441;R-HSA-5694409
R-HSA-73923	Lipid digestion, mobilization, and transport	3	157	0	2.0391e+16	2493203852746667	23	118	1.15471e+16	9606	Homo sapiens	Ap2b1;Ldlr;Vldlr		R-HSA-8855111;R-HSA-171106;R-HSA-8855237;R-HSA-174624;R-HSA-8854628;R-HSA-174657;R-HSA-8854466;R-HSA-6784738;R-HSA-8855232;R-HSA-171141;R-HSA-171118;R-HSA-171087;R-HSA-174706;R-HSA-171122;R-HSA-171059;R-HSA-6784735;R-HSA-8854462;R-HSA-6784734;R-HSA-174808;R-HSA-8855131;R-HSA-8855259;R-HSA-8855130;R-HSA-6784729
R-HSA-391251	Protein folding	2	105	0	2785402259720886	2785402259720886	10	28	273999412858401	9606	Homo sapiens	Tuba4a		R-HSA-389972;R-HSA-389974;R-HSA-389954;R-HSA-389970;R-HSA-389964;R-HSA-389980;R-HSA-389961;R-HSA-389976;R-HSA-389963;R-HSA-389978
R-HSA-1483255	PI Metabolism	2	105	0	2785402259720886	2785402259720886	8	73	714355612095117	9606	Homo sapiens	Vac14;Gdpd1		R-HSA-1676168;R-HSA-1675866;R-HSA-1676174;R-HSA-1675921;R-HSA-6814766;R-HSA-1676005;R-HSA-1676020;R-HSA-1675910
R-HSA-2682334	EPH-Ephrin signaling	2	105	0	2785402259720886	2785402259720886	2	57	5577845190331735	9606	Homo sapiens	Ap2b1;Adam10		R-HSA-3928654;R-HSA-3928660
R-HSA-5687128	MAPK6/MAPK4 signaling	2	105	0	2785402259720886	2785402259720886	1	40	3914277326548586	9606	Homo sapiens	Psmd12;Psmb9		R-HSA-5687112
R-HSA-6811434	COPI-dependent Golgi-to-ER retrograde traffic	2	106	0	2821915144519167	2821915144519167	2	11	1076426264800861	9606	Homo sapiens	Tuba4a		R-HSA-6811426;R-HSA-6811423
R-HSA-425393	Transport of inorganic cations/anions and amino acids/oligopeptides	3	160	0	2.11543e+16	2493203852746667	3	73	714355612095117	9606	Homo sapiens	Ahcyl2;Slc20a2;Slc12a4		R-HSA-427605;R-HSA-426155;R-HSA-8878664
R-HSA-1483166	Synthesis of PA	1	54	0	4145131825193299	4145131825193299	1	14	1369997064292005	9606	Homo sapiens	Gpd1l		R-HSA-75889
R-HSA-1428517	The citric acid (TCA) cycle and respiratory electron transport	4	218	0	1.70795e+16	2493203852746667	8	58	5.6757e+16	9606	Homo sapiens	Pdhx;Mdh1;Mdh2;Atp5j;Dlat		R-HSA-164834;R-HSA-164832;R-HSA-70979;R-HSA-71397;R-HSA-71783;R-HSA-203946;R-HSA-204169;R-HSA-164840
R-HSA-3858494	Beta-catenin independent WNT signaling	3	165	0	2.24402e+16	2493203852746667	3	51	4990703591349447	9606	Homo sapiens	Psmd12;Ap2b1;Psmb9		R-HSA-4608855;R-HSA-5138459;R-HSA-5138433
R-HSA-5620924	Intraflagellar transport	1	55	0	420300706000619	420300706000619	6	12	1.17428e+16	9606	Homo sapiens	Tuba4a		R-HSA-5624949;R-HSA-5625424;R-HSA-5625426;R-HSA-5625421;R-HSA-5625416;R-HSA-5624952
R-HSA-5620920	Cargo trafficking to the periciliary membrane	1	55	0	420300706000619	420300706000619	9	27	2.64214e+16	9606	Homo sapiens	Pkd2		R-HSA-5623525;R-HSA-5623524;R-HSA-5623527;R-HSA-5620918;R-HSA-5623521;R-HSA-5620914;R-HSA-5623519;R-HSA-5620921;R-HSA-5623513
R-HSA-5358351	Signaling by Hedgehog	3	166	0	2.26992e+16	2493203852746667	9	82	8024268519424602	9606	Homo sapiens	Psmd12;Tuba4a;Psmb9		R-HSA-5610757;R-HSA-5362448;R-HSA-5610758;R-HSA-5610754;R-HSA-5610733;R-HSA-5635868;R-HSA-5610767;R-HSA-5635854;R-HSA-5610760
R-HSA-3371453	Regulation of HSF1-mediated heat shock response	2	111	0	3004204935584235	3004204935584235	5	14	1369997064292005	9606	Homo sapiens	St13;Hspa4		R-HSA-5251955;R-HSA-5251942;R-HSA-5251959;R-HSA-5252041;R-HSA-5252079
R-HSA-69239	Synthesis of DNA	2	111	0	3004204935584235	3004204935584235	2	26	2544280262256581	9606	Homo sapiens	Psmd12;Psmb9		R-HSA-68948;R-HSA-69016
R-HSA-6802949	Signaling by RAS mutants	1	57	0	4.31706e+16	4.31706e+16	5	8	7.82855e+11	9606	Homo sapiens	Map2k2		R-HSA-6803233;R-HSA-6802926;R-HSA-6802925;R-HSA-6802924;R-HSA-6802922
R-HSA-532668	N-glycan trimming in the ER and Calnexin/Calreticulin cycle	1	57	0	4.31706e+16	4.31706e+16	1	18	1.76142e+16	9606	Homo sapiens	Uggt1		R-HSA-548884
R-HSA-202131	Metabolism of nitric oxide	1	58	0	437324858923408	437324858923408	3	38	3.71856e+16	9606	Homo sapiens	Dnm2		R-HSA-203625;R-HSA-203662;R-HSA-203565
R-HSA-203765	eNOS activation and regulation	1	58	0	437324858923408	437324858923408	3	38	3.71856e+16	9606	Homo sapiens	Dnm2		R-HSA-203625;R-HSA-203662;R-HSA-203565
R-HSA-73887	Death Receptor Signalling	1	58	0	437324858923408	437324858923408	3	39	3816420393384871	9606	Homo sapiens	Fas		R-HSA-83650;R-HSA-71050;R-HSA-75244
R-HSA-418346	Platelet homeostasis	2	118	0	3.25809e+16	3.25809e+16	1	30	2.93571e+16	9606	Homo sapiens	Atp2a1;Atp2a2		R-HSA-418365
R-HSA-70153	Glucose transport	1	59	0	4428885948492792	4428885948492792	1	19	1.85928e+16	9606	Homo sapiens	Hk2		R-HSA-70420
R-HSA-5339562	Uptake and actions of bacterial toxins	1	59	0	4428885948492792	4428885948492792	1	65	6360700655641452	9606	Homo sapiens	Map2k2		R-HSA-5211356
R-HSA-109581	Apoptosis	3	179	0	2611392243396916	2611392243396916	2	122	1.19385e+16	9606	Homo sapiens	Psmd12;Dapk3;Psmb9		R-HSA-211715;R-HSA-418849
R-HSA-69306	DNA Replication	2	120	0	333023091609422	333023091609422	3	47	4599275858694588	9606	Homo sapiens	Psmd12;Psmb9		R-HSA-68948;R-HSA-68825;R-HSA-69016
R-HSA-5607764	CLEC7A (Dectin-1) signaling	2	120	0	333023091609422	333023091609422	2	45	4403561992367159	9606	Homo sapiens	Psmd12;Psmb9		R-HSA-5607731;R-HSA-5607724
R-HSA-6794361	Interactions of neurexins and neuroligins at synapses	1	60	0	4483977387925968	4483977387925968	1	19	1.85928e+16	9606	Homo sapiens	Stxbp1		R-HSA-6794353
R-HSA-6803157	Antimicrobial peptides	2	122	0	340215444869862	340215444869862	2	58	5.6757e+16	9606	Homo sapiens	Clu;Atp7a		R-HSA-6810643;R-HSA-6803545
R-HSA-69206	G1/S Transition	2	123	0	3.43803e+16	3.43803e+16	1	34	3327135727566298	9606	Homo sapiens	Psmd12;Psmb9		R-HSA-187574
R-HSA-202424	Downstream TCR signaling	2	124	0	347384330196026	347384330196026	1	24	2.34857e+16	9606	Homo sapiens	Psmd12;Psmb9		R-HSA-5607724
R-HSA-917937	Iron uptake and transport	1	62	0	4592543716705274	4592543716705274	2	24	2.34857e+16	9606	Homo sapiens	Atp6v1b2		R-HSA-5252133;R-HSA-917841
R-HSA-5357801	Programmed Cell Death	3	187	0	2.82484e+16	2.82484e+16	2	135	1.32107e+16	9606	Homo sapiens	Psmd12;Dapk3;Psmb9		R-HSA-211715;R-HSA-418849
R-HSA-382556	ABC-family proteins mediated transport	2	127	0	3.5809e+16	3.5809e+16	1	29	2.83785e+16	9606	Homo sapiens	Psmd12;Psmb9		R-HSA-8866553
R-HSA-2500257	Resolution of Sister Chromatid Cohesion	2	128	0	3.61644e+16	3.61644e+16	4	8	7.82855e+11	9606	Homo sapiens	Tuba4a		R-HSA-2484822;R-HSA-1638803;R-HSA-2468287;R-HSA-1638821
R-HSA-3371556	Cellular response to heat stress	2	133	0	3793065538642444	3793065538642444	5	29	2.83785e+16	9606	Homo sapiens	St13;Hspa4		R-HSA-5251955;R-HSA-5251942;R-HSA-5251959;R-HSA-5252041;R-HSA-5252079
R-HSA-2644603	Signaling by NOTCH1 in Cancer	1	67	0	48547717762925	48547717762925	4	39	3816420393384871	9606	Homo sapiens	Adam10		R-HSA-2220976;R-HSA-2220944;R-HSA-2730752;R-HSA-2666278
R-HSA-2894858	Signaling by NOTCH1 HD+PEST Domain Mutants in Cancer	1	67	0	48547717762925	48547717762925	1	21	2.055e+16	9606	Homo sapiens	Adam10		R-HSA-2220976
R-HSA-2894862	Constitutive Signaling by NOTCH1 HD+PEST Domain Mutants	1	67	0	48547717762925	48547717762925	1	21	2.055e+16	9606	Homo sapiens	Adam10		R-HSA-2220976
R-HSA-2644602	Signaling by NOTCH1 PEST Domain Mutants in Cancer	1	67	0	48547717762925	48547717762925	1	21	2.055e+16	9606	Homo sapiens	Adam10		R-HSA-2220944
R-HSA-2644606	Constitutive Signaling by NOTCH1 PEST Domain Mutants	1	67	0	48547717762925	48547717762925	1	21	2.055e+16	9606	Homo sapiens	Adam10		R-HSA-2220944
R-HSA-1227986	Signaling by ERBB2	1	67	0	48547717762925	48547717762925	1	43	420784812603973	9606	Homo sapiens	Cul5		R-HSA-1918095
R-HSA-68877	Mitotic Prometaphase	2	136	0	3.89808e+16	3.89808e+16	5	13	1.27214e+16	9606	Homo sapiens	Tuba4a		R-HSA-2484822;R-HSA-375302;R-HSA-1638803;R-HSA-2468287;R-HSA-1638821
R-HSA-6802952	Signaling by BRAF and RAF fusions	1	68	0	4905682952086745	4905682952086745	5	5	4.89285e+11	9606	Homo sapiens	Map2k2		R-HSA-6802935;R-HSA-6802934;R-HSA-6802933;R-HSA-6802932;R-HSA-6802927
R-HSA-112315	Transmission across Chemical Synapses	4	276	0	2.91963e+16	2.91963e+16	18	104	1.01771e+16	9606	Homo sapiens	Stxbp1;Maoa;Ap2b1;Aldh2		R-HSA-141186;R-HSA-888589;R-HSA-380901;R-HSA-380869;R-HSA-380608;R-HSA-379395;R-HSA-380905;R-HSA-374922;R-HSA-379382;R-HSA-372529;R-HSA-374899;R-HSA-374909;R-HSA-416639;R-HSA-210426;R-HSA-380574;R-HSA-372505;R-HSA-210430;R-HSA-917744
R-HSA-5617833	Cilium Assembly	3	207	0	3363509096788114	3363509096788114	25	50	4892846658185733	9606	Homo sapiens	Tuba4a;Pkd2		R-HSA-5625424;R-HSA-5625426;R-HSA-5623519;R-HSA-5623513;R-HSA-5618328;R-HSA-5617816;R-HSA-5618331;R-HSA-5625421;R-HSA-5625416;R-HSA-5626699;R-HSA-5624949;R-HSA-5626228;R-HSA-5620918;R-HSA-5626227;R-HSA-5620914;R-HSA-5620921;R-HSA-5626681;R-HSA-5624952;R-HSA-5638009;R-HSA-5623525;R-HSA-5623524;R-HSA-5623527;R-HSA-5623521;R-HSA-5626220;R-HSA-5626223
R-HSA-156590	Glutathione conjugation	1	69	0	4.95609e+16	4.95609e+16	1	16	1.56571e+16	9606	Homo sapiens	Gstp1		R-HSA-176054
R-HSA-8856688	Golgi-to-ER retrograde transport	2	141	0	4.07133e+16	4.07133e+16	4	18	1.76142e+16	9606	Homo sapiens	Tuba4a		R-HSA-8849350;R-HSA-6811426;R-HSA-6811423;R-HSA-8849353
R-HSA-948021	Transport to the Golgi and subsequent modification	3	212	0	3498334725240655	3498334725240655	16	60	5871415989822879	9606	Homo sapiens	Tuba4a;Sec24c		R-HSA-5694421;R-HSA-5694418;R-HSA-203973;R-HSA-5694417;R-HSA-6809006;R-HSA-5694527;R-HSA-204008;R-HSA-6809003;R-HSA-5694522;R-HSA-5694439;R-HSA-5694436;R-HSA-5694435;R-HSA-5694446;R-HSA-5694413;R-HSA-5694441;R-HSA-5694409
R-HSA-499943	Synthesis and interconversion of nucleotide di- and triphosphates	1	71	0	5055436568710383	5055436568710383	2	29	2.83785e+16	9606	Homo sapiens	Ak2		R-HSA-110145;R-HSA-110144
R-HSA-189200	Hexose transport	1	71	0	5055436568710383	5055436568710383	1	24	2.34857e+16	9606	Homo sapiens	Hk2		R-HSA-70420
R-HSA-163685	Integration of energy metabolism	2	143	0	4.13999e+16	4.13999e+16	2	65	6360700655641452	9606	Homo sapiens	Stxbp1;Fas		R-HSA-163733;R-HSA-265166
R-HSA-194840	Rho GTPase cycle	2	144	0	4174164957225115	4174164957225115	5	5	4.89285e+11	9606	Homo sapiens	Rhot1;Rhod		R-HSA-194913;R-HSA-194854;R-HSA-194922;R-HSA-195146;R-HSA-194894
R-HSA-69242	S Phase	2	144	0	4174164957225115	4174164957225115	4	53	5186417457676876	9606	Homo sapiens	Psmd12;Psmb9		R-HSA-75825;R-HSA-187574;R-HSA-68948;R-HSA-69016
R-HSA-351202	Metabolism of polyamines	2	144	0	4174164957225115	4174164957225115	1	38	3.71856e+16	9606	Homo sapiens	Psmd12;Psmb9		R-HSA-353125
R-HSA-202403	TCR signaling	2	146	0	4242225674670026	4242225674670026	1	52	5088560524513162	9606	Homo sapiens	Psmd12;Psmb9		R-HSA-5607724
R-HSA-373755	Semaphorin interactions	1	73	0	5152837172314952	5152837172314952	1	40	3914277326548586	9606	Homo sapiens	Itga1		R-HSA-434990
R-HSA-453279	Mitotic G1-G1/S phases	2	147	0	4276104008783126	4276104008783126	1	56	547998825716802	9606	Homo sapiens	Psmd12;Psmb9		R-HSA-187574
R-HSA-204005	COPII (Coat Protein 2) Mediated Vesicle Transport	1	76	0	5295379524436832	5295379524436832	11	16	1.56571e+16	9606	Homo sapiens	Sec24c		R-HSA-5694439;R-HSA-5694421;R-HSA-5694418;R-HSA-203973;R-HSA-5694417;R-HSA-5694446;R-HSA-5694527;R-HSA-204008;R-HSA-5694522;R-HSA-5694441;R-HSA-5694409
R-HSA-6794362	Protein-protein interactions at synapses	1	76	0	5295379524436832	5295379524436832	1	27	2.64214e+16	9606	Homo sapiens	Stxbp1		R-HSA-6794353
R-HSA-1660661	Sphingolipid de novo biosynthesis	1	76	0	5295379524436832	5295379524436832	1	29	2.83785e+16	9606	Homo sapiens	Pkd2		R-HSA-429698
R-HSA-69481	G2/M Checkpoints	2	154	0	4510297715781113	4510297715781113	1	24	2.34857e+16	9606	Homo sapiens	Psmd12;Psmb9		R-HSA-8852354
R-HSA-983168	Antigen processing: Ubiquitination & Proteasome degradation	4	312	0	3723656392056416	3723656392056416	6	8	7.82855e+11	9606	Homo sapiens	Psmd12;Tpp2;Cul5;Psmb9		R-HSA-983150;R-HSA-983147;R-HSA-983162;R-HSA-983157;R-HSA-983140;R-HSA-983156
R-HSA-1483257	Phospholipid metabolism	4	312	0	3723656392056416	3723656392056416	10	204	1.99628e+16	9606	Homo sapiens	Vac14;Gdpd1;Gpd1l;Hadh		R-HSA-75889;R-HSA-1676168;R-HSA-1482775;R-HSA-1675866;R-HSA-1676174;R-HSA-1675921;R-HSA-6814766;R-HSA-1676005;R-HSA-1676020;R-HSA-1675910
R-HSA-1632852	Macroautophagy	1	78	0	5388088996940043	5388088996940043	5	38	3.71856e+16	9606	Homo sapiens	Lamtor5		R-HSA-5672017;R-HSA-5672817;R-HSA-5675790;R-HSA-5672010;R-HSA-5673768
R-HSA-3000178	ECM proteoglycans	1	78	0	5388088996940043	5388088996940043	1	22	2152852529601722	9606	Homo sapiens	Itga7		R-HSA-2681667
R-HSA-112399	IRS-mediated signalling	4	319	0	3.88039e+16	3.88039e+16	23	74	7241413054114884	9606	Homo sapiens	Lamtor5;Psmd12;Map2k2;Psmb9		R-HSA-5653974;R-HSA-5674132;R-HSA-5672980;R-HSA-447074;R-HSA-5672978;R-HSA-5674130;R-HSA-5653936;R-HSA-5653968;R-HSA-377186;R-HSA-5658430;R-HSA-5674366;R-HSA-5672828;R-HSA-5672824;R-HSA-165680;R-HSA-5674373;R-HSA-165718;R-HSA-380979;R-HSA-5674496;R-HSA-5672972;R-HSA-5672973;R-HSA-5672843;R-HSA-165692;R-HSA-5672969
R-HSA-68886	M Phase	4	319	0	3.88039e+16	3.88039e+16	8	63	6164986789314023	9606	Homo sapiens	Psmd12;Tuba4a;Psmb9		R-HSA-2484822;R-HSA-375302;R-HSA-2467809;R-HSA-2467811;R-HSA-174202;R-HSA-1638803;R-HSA-2468287;R-HSA-1638821
R-HSA-74751	Insulin receptor signalling cascade	4	322	0	3.94744e+16	3.94744e+16	23	90	8807123984734318	9606	Homo sapiens	Lamtor5;Psmd12;Map2k2;Psmb9		R-HSA-5653974;R-HSA-5674132;R-HSA-5672980;R-HSA-447074;R-HSA-5672978;R-HSA-5674130;R-HSA-5653936;R-HSA-5653968;R-HSA-377186;R-HSA-5658430;R-HSA-5674366;R-HSA-5672828;R-HSA-5672824;R-HSA-165680;R-HSA-5674373;R-HSA-165718;R-HSA-380979;R-HSA-5674496;R-HSA-5672972;R-HSA-5672973;R-HSA-5672843;R-HSA-165692;R-HSA-5672969
R-HSA-2428928	IRS-related events triggered by IGF1R	4	323	0	3.96977e+16	3.96977e+16	23	77	7534983853606028	9606	Homo sapiens	Lamtor5;Psmd12;Map2k2;Psmb9		R-HSA-5653974;R-HSA-5674132;R-HSA-5672980;R-HSA-447074;R-HSA-5672978;R-HSA-5674130;R-HSA-5653936;R-HSA-5653968;R-HSA-377186;R-HSA-5658430;R-HSA-5674366;R-HSA-5672828;R-HSA-5672824;R-HSA-165680;R-HSA-5674373;R-HSA-165718;R-HSA-380979;R-HSA-5674496;R-HSA-5672972;R-HSA-5672973;R-HSA-5672843;R-HSA-165692;R-HSA-5672969
R-HSA-2428924	IGF1R signaling cascade	4	324	0	3992080176822158	3992080176822158	23	82	8024268519424602	9606	Homo sapiens	Lamtor5;Psmd12;Map2k2;Psmb9		R-HSA-5653974;R-HSA-5674132;R-HSA-5672980;R-HSA-447074;R-HSA-5672978;R-HSA-5674130;R-HSA-5653936;R-HSA-5653968;R-HSA-377186;R-HSA-5658430;R-HSA-5674366;R-HSA-5672828;R-HSA-5672824;R-HSA-165680;R-HSA-5674373;R-HSA-165718;R-HSA-380979;R-HSA-5674496;R-HSA-5672972;R-HSA-5672973;R-HSA-5672843;R-HSA-165692;R-HSA-5672969
R-HSA-2404192	Signaling by Type 1 Insulin-like Growth Factor 1 Receptor (IGF1R)	4	325	0	4.01438e+16	4.01438e+16	23	84	821998238575203	9606	Homo sapiens	Lamtor5;Psmd12;Map2k2;Psmb9		R-HSA-5653974;R-HSA-5674132;R-HSA-5672980;R-HSA-447074;R-HSA-5672978;R-HSA-5674130;R-HSA-5653936;R-HSA-5653968;R-HSA-377186;R-HSA-5658430;R-HSA-5674366;R-HSA-5672828;R-HSA-5672824;R-HSA-165680;R-HSA-5674373;R-HSA-165718;R-HSA-380979;R-HSA-5674496;R-HSA-5672972;R-HSA-5672973;R-HSA-5672843;R-HSA-165692;R-HSA-5672969
R-HSA-5619115	Disorders of transmembrane transporters	3	245	0	4.37513e+16	4.37513e+16	2	87	8513553185243175	9606	Homo sapiens	Psmd12;Slc20a2;Psmb9		R-HSA-5625123;R-HSA-8866858
R-HSA-1236974	ER-Phagosome pathway	2	164	0	4835335815043722	4835335815043722	1	9	8.80712e+11	9606	Homo sapiens	Psmd12;Psmb9		R-HSA-1236935
R-HSA-5579029	Metabolic disorders of biological oxidation enzymes	1	82	0	5568103969851067	5568103969851067	1	33	3.22928e+16	9606	Homo sapiens	Maoa		R-HSA-5603108
R-HSA-1980143	Signaling by NOTCH1	1	82	0	5568103969851067	5568103969851067	1	37	3620706527057442	9606	Homo sapiens	Adam10		R-HSA-157632
R-HSA-2187338	Visual phototransduction	2	165	0	4.86719e+16	4.86719e+16	2	88	8611410118406888	9606	Homo sapiens	Ldlr;Akr1b1		R-HSA-2424254;R-HSA-2855252
R-HSA-196854	Metabolism of vitamins and cofactors	4	335	0	4236558684403916	4236558684403916	5	181	1771210490263235	9606	Homo sapiens	Fas;Ldlr;Akr1b1;Coasy		R-HSA-199202;R-HSA-196754;R-HSA-196773;R-HSA-2424254;R-HSA-2855252
R-HSA-6802957	Oncogenic MAPK signaling	1	84	0	5655479162593129	5655479162593129	24	34	3327135727566298	9606	Homo sapiens	Map2k2		R-HSA-6802919;R-HSA-6802918;R-HSA-6802916;R-HSA-6802914;R-HSA-6803234;R-HSA-6803233;R-HSA-6802912;R-HSA-6802927;R-HSA-6802926;R-HSA-6802925;R-HSA-6802924;R-HSA-6802922;R-HSA-6802921;R-HSA-6802935;R-HSA-6802934;R-HSA-6802933;R-HSA-6802932;R-HSA-6802911;R-HSA-6802943;R-HSA-6802942;R-HSA-6802910;R-HSA-6803230;R-HSA-6802941;R-HSA-6803227
R-HSA-983231	Factors involved in megakaryocyte development and platelet production	2	173	0	511763274020949	511763274020949	2	42	4109991192876015	9606	Homo sapiens	Tuba4a		R-HSA-983259;R-HSA-983266
R-HSA-168928	RIG-I/MDA5 mediated induction of IFN-alpha/beta pathways	1	87	0	5783347004214325	5783347004214325	23	46	4501418925530874	9606	Homo sapiens	Mavs		R-HSA-168934;R-HSA-933538;R-HSA-933539;R-HSA-168909;R-HSA-990528;R-HSA-933537;R-HSA-990526;R-HSA-933532;R-HSA-936381;R-HSA-936378;R-HSA-933530;R-HSA-936475;R-HSA-918232;R-HSA-933528;R-HSA-933526;R-HSA-918230;R-HSA-933527;R-HSA-936564;R-HSA-918229;R-HSA-933525;R-HSA-918227;R-HSA-933523;R-HSA-918225
R-HSA-2871837	FCERI mediated NF-kB activation	2	176	0	5209485323390433	5209485323390433	1	19	1.85928e+16	9606	Homo sapiens	Psmd12;Psmb9		R-HSA-5607724
R-HSA-5673001	RAF/MAP kinase cascade	3	267	0	4.93546e+16	4.93546e+16	11	39	3816420393384871	9606	Homo sapiens	Psmd12;Map2k2;Psmb9		R-HSA-5674132;R-HSA-5672980;R-HSA-5674373;R-HSA-5672978;R-HSA-5674130;R-HSA-5674496;R-HSA-5658430;R-HSA-5674366;R-HSA-5672972;R-HSA-5672973;R-HSA-5672969
R-HSA-112412	SOS-mediated signalling	3	267	0	4.93546e+16	4.93546e+16	11	41	4012134259712301	9606	Homo sapiens	Psmd12;Map2k2;Psmb9		R-HSA-5674132;R-HSA-5672980;R-HSA-5674373;R-HSA-5672978;R-HSA-5674130;R-HSA-5674496;R-HSA-5658430;R-HSA-5674366;R-HSA-5672972;R-HSA-5672973;R-HSA-5672969
R-HSA-179812	GRB2 events in EGFR signaling	3	267	0	4.93546e+16	4.93546e+16	11	42	4109991192876015	9606	Homo sapiens	Psmd12;Map2k2;Psmb9		R-HSA-5674132;R-HSA-5672980;R-HSA-5674373;R-HSA-5672978;R-HSA-5674130;R-HSA-5674496;R-HSA-5658430;R-HSA-5674366;R-HSA-5672972;R-HSA-5672973;R-HSA-5672969
R-HSA-180336	SHC1 events in EGFR signaling	3	267	0	4.93546e+16	4.93546e+16	11	43	420784812603973	9606	Homo sapiens	Psmd12;Map2k2;Psmb9		R-HSA-5674132;R-HSA-5672980;R-HSA-5674373;R-HSA-5672978;R-HSA-5674130;R-HSA-5674496;R-HSA-5658430;R-HSA-5674366;R-HSA-5672972;R-HSA-5672973;R-HSA-5672969
R-HSA-187706	Signalling to p38 via RIT and RIN	3	272	0	5059065551967186	5059065551967186	11	42	4109991192876015	9606	Homo sapiens	Psmd12;Map2k2;Psmb9		R-HSA-5674132;R-HSA-5672980;R-HSA-5674373;R-HSA-5672978;R-HSA-5674130;R-HSA-5674496;R-HSA-5658430;R-HSA-5674366;R-HSA-5672972;R-HSA-5672973;R-HSA-5672969
R-HSA-170984	ARMS-mediated activation	3	272	0	5059065551967186	5059065551967186	11	44	4305705059203444	9606	Homo sapiens	Psmd12;Map2k2;Psmb9		R-HSA-5674132;R-HSA-5672980;R-HSA-5674373;R-HSA-5672978;R-HSA-5674130;R-HSA-5674496;R-HSA-5658430;R-HSA-5674366;R-HSA-5672972;R-HSA-5672973;R-HSA-5672969
R-HSA-5684996	MAPK1/MAPK3 signaling	3	274	0	5108078861777806	5108078861777806	14	46	4501418925530874	9606	Homo sapiens	Psmd12;Map2k2;Psmb9		R-HSA-5674132;R-HSA-5672980;R-HSA-109858;R-HSA-5672978;R-HSA-5674130;R-HSA-109862;R-HSA-5658430;R-HSA-5674366;R-HSA-109864;R-HSA-5674373;R-HSA-5674496;R-HSA-5672972;R-HSA-5672973;R-HSA-5672969
R-HSA-170968	Frs2-mediated activation	3	274	0	5108078861777806	5108078861777806	11	45	4403561992367159	9606	Homo sapiens	Psmd12;Map2k2;Psmb9		R-HSA-5674132;R-HSA-5672980;R-HSA-5674373;R-HSA-5672978;R-HSA-5674130;R-HSA-5674496;R-HSA-5658430;R-HSA-5674366;R-HSA-5672972;R-HSA-5672973;R-HSA-5672969
R-HSA-2586552	Signaling by Leptin	3	275	0	5132491516739005	5132491516739005	11	58	5.6757e+16	9606	Homo sapiens	Psmd12;Map2k2;Psmb9		R-HSA-5674132;R-HSA-5672980;R-HSA-5674373;R-HSA-5672978;R-HSA-5674130;R-HSA-5674496;R-HSA-5658430;R-HSA-5674366;R-HSA-5672972;R-HSA-5672973;R-HSA-5672969
R-HSA-169893	Prolonged ERK activation events	3	276	0	5156840830155368	5156840830155368	11	50	4892846658185733	9606	Homo sapiens	Psmd12;Map2k2;Psmb9		R-HSA-5674132;R-HSA-5672980;R-HSA-5674373;R-HSA-5672978;R-HSA-5674130;R-HSA-5674496;R-HSA-5658430;R-HSA-5674366;R-HSA-5672972;R-HSA-5672973;R-HSA-5672969
R-HSA-912526	Interleukin receptor SHC signaling	3	277	0	5181126307647286	5181126307647286	11	45	4403561992367159	9606	Homo sapiens	Psmd12;Map2k2;Psmb9		R-HSA-5674132;R-HSA-5672980;R-HSA-5674373;R-HSA-5672978;R-HSA-5674130;R-HSA-5674496;R-HSA-5658430;R-HSA-5674366;R-HSA-5672972;R-HSA-5672973;R-HSA-5672969
R-HSA-167044	Signalling to RAS	3	278	0	5205347464194984	5205347464194984	11	49	4794989725022018	9606	Homo sapiens	Psmd12;Map2k2;Psmb9		R-HSA-5674132;R-HSA-5672980;R-HSA-5674373;R-HSA-5672978;R-HSA-5674130;R-HSA-5674496;R-HSA-5658430;R-HSA-5674366;R-HSA-5672972;R-HSA-5672973;R-HSA-5672969
R-HSA-1236975	Antigen processing-Cross presentation	2	186	0	5507309884278463	5507309884278463	2	22	2152852529601722	9606	Homo sapiens	Psmd12;Psmb9		R-HSA-1236935;R-HSA-1236970
R-HSA-69620	Cell Cycle Checkpoints	2	188	0	5565310661309668	5565310661309668	3	58	5.6757e+16	9606	Homo sapiens	Psmd12;Psmb9		R-HSA-69600;R-HSA-8852354;R-HSA-264458
R-HSA-451927	Interleukin-2 signaling	3	284	0	5349297663806957	5349297663806957	11	64	6262843722477738	9606	Homo sapiens	Psmd12;Map2k2;Psmb9		R-HSA-5674132;R-HSA-5672980;R-HSA-5674373;R-HSA-5672978;R-HSA-5674130;R-HSA-5674496;R-HSA-5658430;R-HSA-5674366;R-HSA-5672972;R-HSA-5672973;R-HSA-5672969
R-HSA-5218921	VEGFR2 mediated cell proliferation	3	285	0	5373055764347887	5373055764347887	11	51	4990703591349447	9606	Homo sapiens	Psmd12;Map2k2;Psmb9		R-HSA-5674132;R-HSA-5672980;R-HSA-5674373;R-HSA-5672978;R-HSA-5674130;R-HSA-5674496;R-HSA-5658430;R-HSA-5674366;R-HSA-5672972;R-HSA-5672973;R-HSA-5672969
R-HSA-187687	Signalling to ERKs	3	287	0	5420367943122063	5420367943122063	11	63	6164986789314023	9606	Homo sapiens	Psmd12;Map2k2;Psmb9		R-HSA-5674132;R-HSA-5672980;R-HSA-5674373;R-HSA-5672978;R-HSA-5674130;R-HSA-5674496;R-HSA-5658430;R-HSA-5674366;R-HSA-5672972;R-HSA-5672973;R-HSA-5672969
R-HSA-109704	PI3K Cascade	1	96	0	614497001394746	614497001394746	12	33	3.22928e+16	9606	Homo sapiens	Lamtor5		R-HSA-5653974;R-HSA-165680;R-HSA-165718;R-HSA-447074;R-HSA-5653936;R-HSA-5653968;R-HSA-380979;R-HSA-377186;R-HSA-5672828;R-HSA-5672843;R-HSA-165692;R-HSA-5672824
R-HSA-8853659	RET signaling	3	292	0	5537440006679889	5537440006679889	11	63	6164986789314023	9606	Homo sapiens	Psmd12;Map2k2;Psmb9		R-HSA-5674132;R-HSA-5672980;R-HSA-5674373;R-HSA-5672978;R-HSA-5674130;R-HSA-5674496;R-HSA-5658430;R-HSA-5674366;R-HSA-5672972;R-HSA-5672973;R-HSA-5672969
R-HSA-512988	Interleukin-3, 5 and GM-CSF signaling	3	293	0	5560644291497275	5560644291497275	11	77	7534983853606028	9606	Homo sapiens	Psmd12;Map2k2;Psmb9		R-HSA-5674132;R-HSA-5672980;R-HSA-5674373;R-HSA-5672978;R-HSA-5674130;R-HSA-5674496;R-HSA-5658430;R-HSA-5674366;R-HSA-5672972;R-HSA-5672973;R-HSA-5672969
R-HSA-390466	Chaperonin-mediated protein folding	1	99	0	6258534805335878	6258534805335878	4	19	1.85928e+16	9606	Homo sapiens	Tuba4a		R-HSA-389954;R-HSA-389970;R-HSA-389980;R-HSA-389961
R-HSA-177929	Signaling by EGFR	4	402	0	5650012991130886	5650012991130886	12	139	1.36021e+16	9606	Homo sapiens	Psmd12;Map2k2;Adam10;Psmb9		R-HSA-5674132;R-HSA-5672980;R-HSA-5674373;R-HSA-5672978;R-HSA-5674130;R-HSA-5674496;R-HSA-5658430;R-HSA-5674366;R-HSA-177946;R-HSA-5672972;R-HSA-5672973;R-HSA-5672969
R-HSA-5621481	C-type lectin receptors (CLRs)	2	202	0	5956483831734722	5956483831734722	2	68	6654271455132596	9606	Homo sapiens	Psmd12;Psmb9		R-HSA-5607731;R-HSA-5607724
R-HSA-375165	NCAM signaling for neurite out-growth	3	304	0	5811144018192119	5811144018192119	11	62	6067129856150308	9606	Homo sapiens	Psmd12;Map2k2;Psmb9		R-HSA-5674132;R-HSA-5672980;R-HSA-5674373;R-HSA-5672978;R-HSA-5674130;R-HSA-5674496;R-HSA-5658430;R-HSA-5674366;R-HSA-5672972;R-HSA-5672973;R-HSA-5672969
R-HSA-76002	Platelet activation, signaling and aggregation	3	305	0	5833477401905911	5833477401905911	2	114	1115569038066347	9606	Homo sapiens	Sccpdh;Tuba4a;Clu		R-HSA-482772;R-HSA-481007
R-HSA-983170	Antigen Presentation: Folding, assembly and peptide loading of class I MHC	1	102	0	6368779281265351	6368779281265351	5	15	1.46785e+16	9606	Homo sapiens	Sec24c		R-HSA-983422;R-HSA-203979;R-HSA-983426;R-HSA-983425;R-HSA-983424
R-HSA-195258	RHO GTPase Effectors	3	307	0	5877920744470939	5877920744470939	4	103	1.00793e+16	9606	Homo sapiens	Tuba4a;Rhod		R-HSA-5666088;R-HSA-5666104;R-HSA-5666169;R-HSA-5672329
R-HSA-446203	Asparagine N-linked glycosylation	4	414	0	5883443492236463	5883443492236463	17	143	1.39935e+16	9606	Homo sapiens	Tuba4a;Uggt1;Sec24c		R-HSA-5694421;R-HSA-5694418;R-HSA-203973;R-HSA-5694417;R-HSA-6809006;R-HSA-5694527;R-HSA-204008;R-HSA-6809003;R-HSA-5694522;R-HSA-5694439;R-HSA-5694436;R-HSA-5694435;R-HSA-5694446;R-HSA-5694413;R-HSA-548884;R-HSA-5694441;R-HSA-5694409
R-HSA-422356	Regulation of insulin secretion	1	104	0	6440478669366052	6440478669366052	1	37	3620706527057442	9606	Homo sapiens	Stxbp1		R-HSA-265166
R-HSA-6811442	Intra-Golgi and retrograde Golgi-to-ER traffic	2	211	0	6194159358815814	6194159358815814	4	48	4.69713e+16	9606	Homo sapiens	Tuba4a		R-HSA-8849350;R-HSA-6811426;R-HSA-6811423;R-HSA-8849353
R-HSA-6785807	Interleukin-4 and 13 signaling	2	212	0	62199010692006	62199010692006	1	46	4501418925530874	9606	Homo sapiens	Maoa		R-HSA-6797271
R-HSA-1852241	Organelle biogenesis and maintenance	4	428	0	6146512599152907	6146512599152907	30	96	9394265583716608	9606	Homo sapiens	Tuba4a;Pkd2;Tufm		R-HSA-5389842;R-HSA-5625424;R-HSA-5389845;R-HSA-5625426;R-HSA-5389848;R-HSA-5623519;R-HSA-5623513;R-HSA-5618328;R-HSA-5617816;R-HSA-5618331;R-HSA-5419268;R-HSA-5419269;R-HSA-5625421;R-HSA-5625416;R-HSA-5626699;R-HSA-5624949;R-HSA-5626228;R-HSA-5620918;R-HSA-5626227;R-HSA-5620914;R-HSA-5620921;R-HSA-5626681;R-HSA-5624952;R-HSA-5638009;R-HSA-5623525;R-HSA-5623524;R-HSA-5623527;R-HSA-5623521;R-HSA-5…
R-HSA-201681	TCF dependent signaling in response to WNT	2	215	0	6296328150750155	6296328150750155	4	71	694784225462374	9606	Homo sapiens	Psmd12;Psmb9		R-HSA-1504193;R-HSA-4641260;R-HSA-3640874;R-HSA-4641256
R-HSA-5683057	MAPK family signaling cascades	3	324	0	6243431726784536	6243431726784536	15	86	841569625207946	9606	Homo sapiens	Psmd12;Map2k2;Psmb9		R-HSA-5674132;R-HSA-5672980;R-HSA-109858;R-HSA-5672978;R-HSA-5674130;R-HSA-109862;R-HSA-5658430;R-HSA-5674366;R-HSA-109864;R-HSA-5674373;R-HSA-5674496;R-HSA-5672972;R-HSA-5672973;R-HSA-5687112;R-HSA-5672969
R-HSA-194315	Signaling by Rho GTPases	4	438	0	632803572429799	632803572429799	9	108	1.05685e+16	9606	Homo sapiens	Rhot1;Tuba4a;Rhod		R-HSA-194913;R-HSA-194854;R-HSA-194922;R-HSA-195146;R-HSA-194894;R-HSA-5666088;R-HSA-5666104;R-HSA-5666169;R-HSA-5672329
R-HSA-195721	Signaling by Wnt	3	329	0	6346685084010867	6346685084010867	8	156	1.52657e+16	9606	Homo sapiens	Psmd12;Ap2b1;Psmb9		R-HSA-4608855;R-HSA-5138459;R-HSA-1504193;R-HSA-4641260;R-HSA-2130282;R-HSA-3640874;R-HSA-4641256;R-HSA-5138433
R-HSA-1168372	Downstream signaling events of B Cell Receptor (BCR)	2	225	0	6542481342107727	6542481342107727	1	45	4403561992367159	9606	Homo sapiens	Psmd12;Psmb9		R-HSA-1168640
R-HSA-1483206	Glycerophospholipid biosynthesis	2	225	0	6542481342107727	6542481342107727	2	135	1.32107e+16	9606	Homo sapiens	Gpd1l;Hadh		R-HSA-75889;R-HSA-1482775
R-HSA-425407	SLC-mediated transmembrane transport	4	456	0	6640878986521634	6640878986521634	4	193	1.88864e+16	9606	Homo sapiens	Ahcyl2;Slc20a2;Slc12a4;Hk2		R-HSA-427605;R-HSA-70420;R-HSA-426155;R-HSA-8878664
R-HSA-5389840	Mitochondrial translation elongation	1	115	0	6810431836861496	6810431836861496	5	8	7.82855e+11	9606	Homo sapiens	Tufm		R-HSA-5389842;R-HSA-5419268;R-HSA-5419269;R-HSA-5389845;R-HSA-5389848
R-HSA-5663202	Diseases of signal transduction	4	463	0	6757614432180704	6757614432180704	29	297	2906350914962325	9606	Homo sapiens	Psmd12;Map2k2;Adam10;Psmb9		R-HSA-6802919;R-HSA-6802918;R-HSA-6802916;R-HSA-6802914;R-HSA-6803234;R-HSA-6803233;R-HSA-6802912;R-HSA-6802927;R-HSA-6802926;R-HSA-6802925;R-HSA-6802924;R-HSA-6802922;R-HSA-6802921;R-HSA-2666278;R-HSA-6802935;R-HSA-6802934;R-HSA-2220976;R-HSA-5387392;R-HSA-6802933;R-HSA-6802932;R-HSA-6802943;R-HSA-6802942;R-HSA-6802941;R-HSA-2730752;R-HSA-2220944;R-HSA-6802911;R-HSA-6802910;R-HSA-6803230;R-HSA-6…
R-HSA-1433557	Signaling by SCF-KIT	3	367	0	7066958590007766	7066958590007766	11	108	1.05685e+16	9606	Homo sapiens	Psmd12;Map2k2;Psmb9		R-HSA-5674132;R-HSA-5672980;R-HSA-5674373;R-HSA-5672978;R-HSA-5674130;R-HSA-5674496;R-HSA-5658430;R-HSA-5674366;R-HSA-5672972;R-HSA-5672973;R-HSA-5672969
R-HSA-196849	Metabolism of water-soluble vitamins and cofactors	2	248	0	7059404518669739	7059404518669739	3	138	1.35043e+16	9606	Homo sapiens	Fas;Coasy		R-HSA-199202;R-HSA-196754;R-HSA-196773
R-HSA-4420097	VEGFA-VEGFR2 Pathway	3	372	0	7153252117177289	7153252117177289	11	115	1.12535e+16	9606	Homo sapiens	Psmd12;Map2k2;Psmb9		R-HSA-5674132;R-HSA-5672980;R-HSA-5674373;R-HSA-5672978;R-HSA-5674130;R-HSA-5674496;R-HSA-5658430;R-HSA-5674366;R-HSA-5672972;R-HSA-5672973;R-HSA-5672969
R-HSA-2980736	Peptide hormone metabolism	1	126	0	7142201546111018	7142201546111018	2	53	5186417457676876	9606	Homo sapiens	Ctsd		R-HSA-2022412;R-HSA-2022403
R-HSA-2871796	FCERI mediated MAPK activation	3	378	0	7254232371480547	7254232371480547	11	59	5.77356e+16	9606	Homo sapiens	Psmd12;Map2k2;Psmb9		R-HSA-5674132;R-HSA-5672980;R-HSA-5674373;R-HSA-5672978;R-HSA-5674130;R-HSA-5674496;R-HSA-5658430;R-HSA-5674366;R-HSA-5672972;R-HSA-5672973;R-HSA-5672969
R-HSA-194138	Signaling by VEGF	3	381	0	7303676891477603	7303676891477603	11	121	1.18407e+16	9606	Homo sapiens	Psmd12;Map2k2;Psmb9		R-HSA-5674132;R-HSA-5672980;R-HSA-5674373;R-HSA-5672978;R-HSA-5674130;R-HSA-5674496;R-HSA-5658430;R-HSA-5674366;R-HSA-5672972;R-HSA-5672973;R-HSA-5672969
R-HSA-186763	Downstream signal transduction	3	389	0	7432151148999396	7432151148999396	11	105	1.0275e+16	9606	Homo sapiens	Psmd12;Map2k2;Psmb9		R-HSA-5674132;R-HSA-5672980;R-HSA-5674373;R-HSA-5672978;R-HSA-5674130;R-HSA-5674496;R-HSA-5658430;R-HSA-5674366;R-HSA-5672972;R-HSA-5672973;R-HSA-5672969
R-HSA-2424491	DAP12 signaling	3	392	0	7479072691222823	7479072691222823	11	106	1.03728e+16	9606	Homo sapiens	Psmd12;Map2k2;Psmb9		R-HSA-5674132;R-HSA-5672980;R-HSA-5674373;R-HSA-5672978;R-HSA-5674130;R-HSA-5674496;R-HSA-5658430;R-HSA-5674366;R-HSA-5672972;R-HSA-5672973;R-HSA-5672969
R-HSA-69278	Cell Cycle, Mitotic	4	533	0	7771235964231484	7771235964231484	38	294	2.87699e+16	9606	Homo sapiens	Psmd12;Tuba4a;Psmb9		R-HSA-375302;R-HSA-380294;R-HSA-2467809;R-HSA-8852354;R-HSA-2467811;R-HSA-1638803;R-HSA-380303;R-HSA-8852298;R-HSA-3000319;R-HSA-380311;R-HSA-8852306;R-HSA-68948;R-HSA-68825;R-HSA-380508;R-HSA-380316;R-HSA-69016;R-HSA-2468287;R-HSA-2574845;R-HSA-8853405;R-HSA-3000310;R-HSA-174105;R-HSA-8854044;R-HSA-188191;R-HSA-2574840;R-HSA-380455;R-HSA-174058;R-HSA-8853419;R-HSA-174255;R-HSA-8854071;R-HSA-7582…
R-HSA-2172127	DAP12 interactions	3	409	0	7732261673711445	7732261673711445	11	122	1.19385e+16	9606	Homo sapiens	Psmd12;Map2k2;Psmb9		R-HSA-5674132;R-HSA-5672980;R-HSA-5674373;R-HSA-5672978;R-HSA-5674130;R-HSA-5674496;R-HSA-5658430;R-HSA-5674366;R-HSA-5672972;R-HSA-5672973;R-HSA-5672969
R-HSA-186797	Signaling by PDGF	3	420	0	7884863132935094	7884863132935094	11	117	1.14493e+16	9606	Homo sapiens	Psmd12;Map2k2;Psmb9		R-HSA-5674132;R-HSA-5672980;R-HSA-5674373;R-HSA-5672978;R-HSA-5674130;R-HSA-5674496;R-HSA-5658430;R-HSA-5674366;R-HSA-5672972;R-HSA-5672973;R-HSA-5672969
R-HSA-5368287	Mitochondrial translation	1	143	0	7588801366408915	7588801366408915	5	17	1663567863783149	9606	Homo sapiens	Tufm		R-HSA-5389842;R-HSA-5419268;R-HSA-5419269;R-HSA-5389845;R-HSA-5389848
R-HSA-166016	Toll Like Receptor 4 (TLR4) Cascade	1	143	0	7588801366408915	7588801366408915	1	94	9198551717389176	9606	Homo sapiens	Dnm2		R-HSA-2201293
R-HSA-166658	Complement cascade	1	144	0	7612799672355596	7612799672355596	4	60	5871415989822879	9606	Homo sapiens	Clu		R-HSA-173723;R-HSA-173720;R-HSA-173709;R-HSA-173725
R-HSA-163200	Respiratory electron transport, ATP synthesis by chemiosmotic coupling, and heat production by uncoupling proteins.	1	146	0	7660087551979173	7660087551979173	3	29	2.83785e+16	9606	Homo sapiens	Atp5j		R-HSA-164834;R-HSA-164832;R-HSA-164840
R-HSA-5619102	SLC transporter disorders	1	149	0	7729282045162603	7729282045162603	1	65	6360700655641452	9606	Homo sapiens	Slc20a2		R-HSA-5625123
R-HSA-211945	Phase 1 - Functionalization of compounds	2	300	0	7994704155880906	7994704155880906	2	99	968783638320775	9606	Homo sapiens	Maoa;Aldh2		R-HSA-141186;R-HSA-71723
R-HSA-428157	Sphingolipid metabolism	1	154	0	7840122629627363	7840122629627363	1	60	5871415989822879	9606	Homo sapiens	Pkd2		R-HSA-429698
R-HSA-112314	Neurotransmitter Receptor Binding And Downstream Transmission In The Postsynaptic Cell	1	160	0	7966065139248918	7966065139248918	1	53	5186417457676876	9606	Homo sapiens	Ap2b1		R-HSA-416639
R-HSA-983705	Signaling by the B Cell Receptor (BCR)	2	322	0	8304696239929248	8304696239929248	1	66	6458557588805167	9606	Homo sapiens	Psmd12;Psmb9		R-HSA-1168640
R-HSA-1640170	Cell Cycle	4	645	0	8858802492973102	8858802492973102	40	383	3747920540170271	9606	Homo sapiens	Psmd12;Tuba4a;Psmb9		R-HSA-375302;R-HSA-380294;R-HSA-2467809;R-HSA-8852354;R-HSA-2467811;R-HSA-1638803;R-HSA-380303;R-HSA-8852298;R-HSA-264458;R-HSA-3000319;R-HSA-380311;R-HSA-8852306;R-HSA-68948;R-HSA-68825;R-HSA-380508;R-HSA-380316;R-HSA-69016;R-HSA-2468287;R-HSA-2574845;R-HSA-8853405;R-HSA-3000310;R-HSA-174105;R-HSA-8854044;R-HSA-188191;R-HSA-2574840;R-HSA-69600;R-HSA-380455;R-HSA-174058;R-HSA-8853419;R-HSA-174255…
R-HSA-2454202	Fc epsilon receptor (FCERI) signaling	3	497	0	8731154473284249	8731154473284249	12	135	1.32107e+16	9606	Homo sapiens	Psmd12;Map2k2;Psmb9		R-HSA-5674132;R-HSA-5672980;R-HSA-5674373;R-HSA-5672978;R-HSA-5674130;R-HSA-5674496;R-HSA-5658430;R-HSA-5674366;R-HSA-5607724;R-HSA-5672972;R-HSA-5672973;R-HSA-5672969
R-HSA-881907	Gastrin-CREB signalling pathway via PKC and MAPK	3	504	0	8790996004700025	8790996004700025	11	68	6654271455132596	9606	Homo sapiens	Psmd12;Map2k2;Psmb9		R-HSA-5674132;R-HSA-5672980;R-HSA-5674373;R-HSA-5672978;R-HSA-5674130;R-HSA-5674496;R-HSA-5658430;R-HSA-5674366;R-HSA-5672972;R-HSA-5672973;R-HSA-5672969
R-HSA-168273	Influenza Viral RNA Transcription and Replication	1	171	0	8178328670382866	8178328670382866	1	15	1.46785e+16	9606	Homo sapiens	Ipo5		R-HSA-192830
R-HSA-211859	Biological oxidations	3	540	0	906109963150621	906109963150621	3	185	1810353263528721	9606	Homo sapiens	Maoa;Aldh2;Gstp1		R-HSA-141186;R-HSA-176054;R-HSA-71723
R-HSA-168898	Toll-Like Receptors Cascades	1	182	0	8368593930173862	8368593930173862	1	161	1575496623935806	9606	Homo sapiens	Dnm2		R-HSA-2201293
R-HSA-168255	Influenza Life Cycle	1	183	0	8384880079885038	8384880079885038	1	52	5088560524513162	9606	Homo sapiens	Ipo5		R-HSA-192830
R-HSA-3781865	Diseases of glycosylation	1	190	0	849445348118982	849445348118982	1	58	5.6757e+16	9606	Homo sapiens	Pgm1		R-HSA-5609939
R-HSA-168254	Influenza Infection	1	195	0	856817243302441	856817243302441	1	60	5871415989822879	9606	Homo sapiens	Ipo5		R-HSA-192830
R-HSA-5668914	Diseases of metabolism	1	217	0	8852230810527311	8852230810527311	1	95	9296408650552892	9606	Homo sapiens	Maoa		R-HSA-5603108
R-HSA-15869	Metabolism of nucleotides	1	248	0	9160054988451748	9160054988451748	2	136	1.33085e+16	9606	Homo sapiens	Ak2		R-HSA-110145;R-HSA-110144
R-HSA-156580	Phase II conjugation	1	250	0	9176827321261656	9176827321261656	1	69	6.75213e+16	9606	Homo sapiens	Gstp1		R-HSA-176054
R-HSA-202733	Cell surface interactions at the vascular wall	1	257	0	9232955640591018	9232955640591018	1	64	6262843722477738	9606	Homo sapiens	Atp1b3		R-HSA-375133
R-HSA-372790	Signaling by GPCR	3	1504	0	9999784530393198	9999784530393198	11	326	3190136021137097	9606	Homo sapiens	Psmd12;Map2k2;Psmb9		R-HSA-5674132;R-HSA-5672980;R-HSA-5674373;R-HSA-5672978;R-HSA-5674130;R-HSA-5674496;R-HSA-5658430;R-HSA-5674366;R-HSA-5672972;R-HSA-5672973;R-HSA-5672969

## Sheet: Cluster_4_early up
Pathway identifier	Pathway name	#Entities found	#Entities total	Entities ratio	Entities pValue	Entities FDR	#Reactions found	#Reactions total	Reactions ratio	Species identifier	Species name	Submitted entities found	Mapped entities	Found reaction identifiers
R-HSA-390522	Striated Muscle Contraction	17	40	0.425	1.11022	83.4888	4	4	3.91428e+11	9606	Homo sapiens	Acta1;Tnnt3;Tnnt2;Tnnt1;Tpm1;ttn;Tnni1;Ttn;Myl4;Tnnc2;Tnnc1;Tmod1;Myh3;Myh7		R-HSA-390597;R-HSA-390598;R-HSA-390593;R-HSA-390595
R-HSA-397014	Muscle contraction	24	214	0.11215	235154	8.84179e+06	16	39	3816420393384871	9606	Homo sapiens	Acta1;Tnnt3;Tnnt2;Tnnt1;Mylpf;Cav3;Tpm1;ttn;Mylk;Tnni1;Ttn;Myl4;Tnnc2;Tnnc1;Ahcyl1;Tmod1;Myh3;Myl6b;Itpr1;Myh7		R-HSA-390597;R-HSA-5263633;R-HSA-445700;R-HSA-390598;R-HSA-445797;R-HSA-390593;R-HSA-445699;R-HSA-390595;R-HSA-139854;R-HSA-5617179;R-HSA-445704;R-HSA-445705;R-HSA-169683;R-HSA-445813;R-HSA-5226904;R-HSA-5263628
R-HSA-186763	Downstream signal transduction	13	389	0.033419	5518520472299049	5201597917211749	12	105	1.0275e+16	9606	Homo sapiens	Ahcyl1;Tpk1;Cd80;Prkce;Ncam1;Phb;Cdkn1a;Sptbn1;Crk;Itpr1;Bcar1;Sptan1		R-HSA-5672950;R-HSA-2316434;R-HSA-382052;R-HSA-169683;R-HSA-169680;R-HSA-5672965;R-HSA-111925;R-HSA-111924;R-HSA-198613;R-HSA-198314;R-HSA-382056;R-HSA-111919
R-HSA-186797	Signaling by PDGF	14	420	0.0333333	4.86435e+16	5201597917211749	13	117	1.14493e+16	9606	Homo sapiens	Gulp1;Tpk1;Cd80;Ncam1;Phb;Sptbn1;Bcar1;Sptan1;Ahcyl1;Prkce;Cdkn1a;Crk;Itpr1		R-HSA-5672950;R-HSA-382052;R-HSA-382054;R-HSA-198314;R-HSA-382056;R-HSA-111919;R-HSA-2316434;R-HSA-169683;R-HSA-169680;R-HSA-5672965;R-HSA-111925;R-HSA-111924;R-HSA-198613
R-HSA-535734	Fatty acid, triacylglycerol, and ketone body metabolism	13	430	0.0302326	1.00236e+16	5201597917211749	8	151	1.47764e+16	9606	Homo sapiens	Abca1;Acly;Hsd17b8;Me1;Fhl2;Ankrd1;Fdft1;Srl		R-HSA-1989756;R-HSA-1655850;R-HSA-1592238;R-HSA-75848;R-HSA-1989765;R-HSA-1989747;R-HSA-1989779;R-HSA-8862152
R-HSA-6798695	Neutrophil degranulation	14	480	0.0291667	1.1173e+16	5201597917211749	5	10	9.78569e+11	9606	Homo sapiens	Cda;Gpi;Pygb;Tubb3;Dync1h1;Aprt;Hsp90ab1;Sptan1;Acly;Alad;Gm2a;Pgm3;Prdx6;B2m		R-HSA-6800434;R-HSA-6798751;R-HSA-6798749;R-HSA-6798748;R-HSA-6798745
R-HSA-199991	Membrane Trafficking	19	658	0.0288754	7800694664904595	5201597917211749	43	218	2.13328e+16	9606	Homo sapiens	App;Nbas;Bloc1s3;Tubb3;Sptbn1;Dync1h1;Sptan1;Myh1;Myh3;Bin1;Itsn2;Ston1;Amph;Snap91;Myh7		R-HSA-8849350;R-HSA-8868230;R-HSA-5229132;R-HSA-6811427;R-HSA-6811426;R-HSA-6809006;R-HSA-8868236;R-HSA-6809003;R-HSA-8849353;R-HSA-8862280;R-HSA-6809011;R-HSA-6809010;R-HSA-2316347;R-HSA-8867613;R-HSA-8871194;R-HSA-8871193;R-HSA-190877;R-HSA-8868071;R-HSA-8863463;R-HSA-6807877;R-HSA-2316352;R-HSA-6807875;R-HSA-8863727;R-HSA-8856813;R-HSA-8867756;R-HSA-8868651;R-HSA-8866283;R-HSA-8863723;R-HSA-88…
R-HSA-166520	Signalling by NGF	13	521	0.024952	2.59873e+16	5201597917211749	18	197	1.92778e+16	9606	Homo sapiens	Tpk1;Casp3;Cd80;Ncam1;Phb;Sptbn1;Sptan1;Rtn4;Ahcyl1;Prkce;Cdkn1a;Crk;Itpr1		R-HSA-5672950;R-HSA-169891;R-HSA-193696;R-HSA-169895;R-HSA-198314;R-HSA-111919;R-HSA-169901;R-HSA-2316434;R-HSA-169683;R-HSA-169904;R-HSA-169680;R-HSA-5672965;R-HSA-169905;R-HSA-111925;R-HSA-111924;R-HSA-193655;R-HSA-198613;R-HSA-205117
R-HSA-5653656	Vesicle-mediated transport	20	819	0.02442	2.24337e+16	5201597917211749	44	250	2446423329092866	9606	Homo sapiens	App;Gulp1;Nbas;Bloc1s3;Tubb3;Sptbn1;Dync1h1;Sptan1;Myh1;Myh3;Bin1;Itsn2;Ston1;Amph;Snap91;Myh7		R-HSA-8849350;R-HSA-8868230;R-HSA-5229132;R-HSA-6811427;R-HSA-6811426;R-HSA-6809006;R-HSA-8868236;R-HSA-6809003;R-HSA-8849353;R-HSA-8862280;R-HSA-6809011;R-HSA-6809010;R-HSA-2316347;R-HSA-8867613;R-HSA-8871194;R-HSA-8871193;R-HSA-190877;R-HSA-8868071;R-HSA-8863463;R-HSA-3221843;R-HSA-6807877;R-HSA-2316352;R-HSA-6807875;R-HSA-8863727;R-HSA-8856813;R-HSA-8867756;R-HSA-8868651;R-HSA-8866283;R-HSA-88…
R-HSA-422475	Axon guidance	14	598	0.0234114	3.27504e+16	5201597917211749	72	286	2798708288482239	9606	Homo sapiens	Gulp1;Tubb3;Tpk1;Ncam1;Slit2;Phb;Sptbn1;Epha2;Hsp90ab1;Sptan1;Myl6b;Git1;Cap2		R-HSA-525833;R-HSA-3928633;R-HSA-445071;R-HSA-3928625;R-HSA-3928631;R-HSA-3928628;R-HSA-445077;R-HSA-3928616;R-HSA-374681;R-HSA-3928614;R-HSA-5672950;R-HSA-3928602;R-HSA-3928607;R-HSA-3928604;R-HSA-3928594;R-HSA-392751;R-HSA-3928597;R-HSA-422454;R-HSA-4093327;R-HSA-3928584;R-HSA-3928591;R-HSA-3928578;R-HSA-391868;R-HSA-391871;R-HSA-419644;R-HSA-419645;R-HSA-391865;R-HSA-391867;R-HSA-391866;R-HSA-…
R-HSA-449147	Signaling by Interleukins	15	662	0.0226586	364829708269393	5201597917211749	9	281	2.74978e+16	9606	Homo sapiens	Ccnd1;Casp3;Cd80;Bcl2l1;Ncam1;Phb;Cdkn1a;Sptbn1;Crk;Sptan1		R-HSA-8937656;R-HSA-5672950;R-HSA-5672965;R-HSA-912734;R-HSA-6790036;R-HSA-449073;R-HSA-912790;R-HSA-6790041;R-HSA-6790025
R-HSA-109582	Hemostasis	16	796	0.0201005	5481337996645765	5481337996645765	20	322	3150993247871612	9606	Homo sapiens	App;Tubb3;Tpk1;Igf2;Habp4;Bcar1;ttn;Ttn;Ehd1;Irf3;Itga3;Prkce;Crk;Cap2;Itpr1		R-HSA-425861;R-HSA-372705;R-HSA-139941;R-HSA-481007;R-HSA-992708;R-HSA-994148;R-HSA-418442;R-HSA-139854;R-HSA-983266;R-HSA-879459;R-HSA-372693;R-HSA-204434;R-HSA-482772;R-HSA-418549;R-HSA-983259;R-HSA-418451;R-HSA-994169;R-HSA-1011576;R-HSA-372697;R-HSA-994034
R-HSA-1280215	Cytokine Signaling in Immune system	19	979	0.0194076	609429837788739	609429837788739	14	413	4041491339661415	9606	Homo sapiens	Ccnd1;Casp3;Cd80;Bcl2l1;Ncam1;Phb;Sptbn1;Pml;Sptan1;Irf3;Eif4a2;Cdkn1a;Crk;B2m		R-HSA-936462;R-HSA-5672950;R-HSA-1169394;R-HSA-1678842;R-HSA-1031716;R-HSA-6790025;R-HSA-8937656;R-HSA-5672965;R-HSA-912734;R-HSA-6790036;R-HSA-449073;R-HSA-1015702;R-HSA-912790;R-HSA-6790041
R-HSA-168249	Innate Immune System	29	1528	0.0189791	6723682116455807	6723682116455807	73	702	6869556708092768	9606	Homo sapiens	App;Cda;Gpi;Phb;Dync1h1;Aprt;Acly;Ahcyl1;Gm2a;Pgm3;Prdx6;Pygb;Tubb3;Tpk1;Cd80;Bcl2l1;Ncam1;Sptbn1;Hsp90ab1;Dak;Sptan1;Alad;Myh3;Irf3;Prkce;Cdkn1a;Crk;B2m;Itpr1		R-HSA-936462;R-HSA-2424484;R-HSA-2424486;R-HSA-2424487;R-HSA-2424480;R-HSA-177671;R-HSA-2029467;R-HSA-210309;R-HSA-2424482;R-HSA-2395439;R-HSA-3134883;R-HSA-879362;R-HSA-2032396;R-HSA-844440;R-HSA-2396594;R-HSA-1834939;R-HSA-5672950;R-HSA-198314;R-HSA-111919;R-HSA-1606327;R-HSA-913725;R-HSA-2395412;R-HSA-2316434;R-HSA-936380;R-HSA-111925;R-HSA-111924;R-HSA-1296421;R-HSA-2272795;R-HSA-419644;R-HSA…
R-HSA-168256	Immune System	48	2591	0.0185257	775745360093579	775745360093579	144	1284	1256483021822096	9606	Homo sapiens	App;Gulp1;Cda;Gpi;Phb;Dync1h1;Aprt;Cd200;Mrc2;Acly;Ahcyl1;Gm2a;Pgm3;Rnf14;Prdx6;Klhl41;Pag1;Pygb;Npepps;Tubb3;Ccnd1;Tpk1;Cd81;Casp3;Cd80;Bcl2l1;Ncam1;Sptbn1;Pml;Hsp90ab1;Dak;Sptan1;Alad;Myh3;Irf3;Eif4a2;Prkce;Klhl13;Cdkn1a;Crk;B2m;Itpr1		R-HSA-936462;R-HSA-389381;R-HSA-199169;R-HSA-177671;R-HSA-2395439;R-HSA-879362;R-HSA-8850326;R-HSA-2032396;R-HSA-389158;R-HSA-198955;R-HSA-1031716;R-HSA-198958;R-HSA-111919;R-HSA-8937656;R-HSA-913725;R-HSA-2395412;R-HSA-5696356;R-HSA-8850356;R-HSA-5696357;R-HSA-111925;R-HSA-111924;R-HSA-1296421;R-HSA-449073;R-HSA-2272795;R-HSA-419644;R-HSA-419645;R-HSA-879411;R-HSA-913996;R-HSA-2396007;R-HSA-2396…
R-HSA-1430728	Metabolism	61	3519	0.0173345	9337118343394412	9337118343394412	119	2145	2.09903e+16	9606	Homo sapiens	Gpi;Cda;Fhl2;Sord;Fdft1;Hsd17b10;Mtap;Csad;Rfk;Hagh;Pgm3;Akap5;Nnmt;Cycs;Blvrb;Hprt1;Hsp90ab1;Ptgis;Alad;Ldhb;Gstt2;Tkt;Fxn;Gsta6;Hsd17b8;Gsta1;Srl;Osbpl6;Aprt;Acly;Abcd4;Adipor1;Ahcyl1;Gatm;Gm2a;Pck2;Pygb;Hexa;Got1;Ckm;Tpk1;Ankrd1;Lipa;Dhcr7;Dak;Abca1;Ephx1;Hibadh;Ogn;Me1;Nes;Itpr1		R-HSA-2046239;R-HSA-8865667;R-HSA-2426146;R-HSA-5359451;R-HSA-1655827;R-HSA-381707;R-HSA-2426155;R-HSA-2162225;R-HSA-2046222;R-HSA-381713;R-HSA-1605632;R-HSA-8936849;R-HSA-70427;R-HSA-1482547;R-HSA-2046265;R-HSA-164651;R-HSA-5694077;R-HSA-196402;R-HSA-1482533;R-HSA-1655850;R-HSA-111925;R-HSA-193845;R-HSA-508473;R-HSA-2408544;R-HSA-2046298;R-HSA-70471;R-HSA-1475422;R-HSA-75848;R-HSA-70475;R-HSA-16…
R-HSA-1280218	Adaptive Immune System	18	1076	0.0167286	830677487372229	830677487372229	64	271	2651922888736667	9606	Homo sapiens	Gulp1;Npepps;Tubb3;Tpk1;Cd81;Cd80;Dync1h1;Cd200;Mrc2;Ahcyl1;Klhl13;Rnf14;Cdkn1a;Klhl41;B2m;Pag1;Itpr1		R-HSA-389381;R-HSA-199043;R-HSA-199169;R-HSA-199558;R-HSA-983427;R-HSA-983426;R-HSA-199566;R-HSA-983425;R-HSA-983424;R-HSA-8850326;R-HSA-199062;R-HSA-199579;R-HSA-199576;R-HSA-199583;R-HSA-199587;R-HSA-2213248;R-HSA-389158;R-HSA-198955;R-HSA-198958;R-HSA-2316434;R-HSA-5696356;R-HSA-8850356;R-HSA-5696357;R-HSA-913996;R-HSA-1236954;R-HSA-1236955;R-HSA-388814;R-HSA-388809;R-HSA-388811;R-HSA-169683;R…
R-HSA-556833	Metabolism of lipids and lipoproteins	22	1402	0.0156919	9184384557038334	9184384557038334	38	898	8787552598101575	9606	Homo sapiens	Hsd17b8;Hexa;Tpk1;Fhl2;Lipa;Ankrd1;Dhcr7;Fdft1;Srl;Osbpl6;Abca1;Acly;Ptgis;Gm2a;Me1;Nes		R-HSA-1482646;R-HSA-1605595;R-HSA-8865667;R-HSA-2426146;R-HSA-75848;R-HSA-1655827;R-HSA-1605717;R-HSA-1989779;R-HSA-2426155;R-HSA-8862152;R-HSA-216723;R-HSA-76496;R-HSA-216727;R-HSA-8867667;R-HSA-1482691;R-HSA-163418;R-HSA-1605632;R-HSA-163416;R-HSA-1482636;R-HSA-1989765;R-HSA-192157;R-HSA-5682103;R-HSA-1989756;R-HSA-5682101;R-HSA-1482547;R-HSA-6807055;R-HSA-191402;R-HSA-1989747;R-HSA-191405;R-HS…
R-HSA-1266738	Developmental Biology	17	1159	0.0146678	9396505870763968	9396505870763968	90	472	4.61885e+16	9606	Homo sapiens	Gulp1;Tubb3;Tpk1;Ncam1;Bnip2;Slit2;Phb;Sptbn1;Epha2;Hsp90ab1;Sptan1;Cdh15;Pkp2;Myl6b;Git1;Cap2		R-HSA-6814695;R-HSA-525833;R-HSA-3928633;R-HSA-445071;R-HSA-3928625;R-HSA-3928631;R-HSA-3928628;R-HSA-6810357;R-HSA-445077;R-HSA-3928616;R-HSA-8942224;R-HSA-374681;R-HSA-3928614;R-HSA-5672950;R-HSA-3928602;R-HSA-3928607;R-HSA-3928604;R-HSA-3928594;R-HSA-392751;R-HSA-3928597;R-HSA-376117;R-HSA-422454;R-HSA-448951;R-HSA-4093327;R-HSA-376119;R-HSA-3928584;R-HSA-3928591;R-HSA-449200;R-HSA-448958;R-HS…
R-HSA-392499	Metabolism of proteins	24	1857	0.0129241	9955522777138708	9955522777138708	69	670	6556414521968881	9606	Homo sapiens	Acta1;App;Uchl1;Tubb3;Timm10;Mpi;Igf2;Adamts8;Sptbn1;Dync1h1;Pml;Sptan1;Nop56;Igfbp5;Gfpt1;Eif4a2;Pgm3;Cdkn2b;Uchl3;Tomm22;Fxn;B2m		R-HSA-1299475;R-HSA-6783332;R-HSA-381446;R-HSA-1299478;R-HSA-5173192;R-HSA-400513;R-HSA-1299481;R-HSA-156808;R-HSA-1299480;R-HSA-8853514;R-HSA-381461;R-HSA-3000383;R-HSA-5228508;R-HSA-156823;R-HSA-5692495;R-HSA-5690319;R-HSA-157849;R-HSA-381466;R-HSA-6807877;R-HSA-6807875;R-HSA-1268022;R-HSA-1955380;R-HSA-72619;R-HSA-381487;R-HSA-72621;R-HSA-449715;R-HSA-72631;R-HSA-381500;R-HSA-72635;R-HSA-38150…
R-HSA-162582	Signal Transduction	32	2905	0.0110155	9999920814038192	9999920814038192	93	1836	1796653292885801	9606	Homo sapiens	App;Gulp1;Col11a1;Arhgap28;Phb;Bcar1;Rtn4;Ahcyl1;Itga3;Cdkn2b;Pag1;Tubb3;Ccnd1;Tpk1;Casp3;Cd80;Igf2;Ncam1;Sptbn1;Ktn1;Sptan1;Mylk;Prkce;Myl6b;Cdkn1a;Crk;Itpr1		R-HSA-425861;R-HSA-749448;R-HSA-177926;R-HSA-749454;R-HSA-2187303;R-HSA-177284;R-HSA-2028697;R-HSA-749452;R-HSA-5610717;R-HSA-2028692;R-HSA-8875661;R-HSA-8875659;R-HSA-5668932;R-HSA-8875540;R-HSA-4420052;R-HSA-4395227;R-HSA-8848414;R-HSA-749456;R-HSA-5672950;R-HSA-5610741;R-HSA-8875558;R-HSA-169891;R-HSA-193696;R-HSA-5668978;R-HSA-169895;R-HSA-8934446;R-HSA-419232;R-HSA-2428930;R-HSA-139941;R-HSA…
R-HSA-597592	Post-translational protein modification	13	1191	0.0109152	9963021536974400	9963021536974400	21	390	3.81642e+16	9606	Homo sapiens	Uchl1;Tubb3;Gfpt1;Mpi;Pgm3;Adamts8;Cdkn2b;Sptbn1;Uchl3;Dync1h1;Pml;Sptan1		R-HSA-6807877;R-HSA-5173005;R-HSA-6807875;R-HSA-5173192;R-HSA-2997706;R-HSA-6809006;R-HSA-4568846;R-HSA-6809003;R-HSA-532549;R-HSA-8853514;R-HSA-5690808;R-HSA-446185;R-HSA-3000383;R-HSA-5228508;R-HSA-6809011;R-HSA-6809010;R-HSA-449715;R-HSA-3000411;R-HSA-8853503;R-HSA-5690319;R-HSA-3000433
R-HSA-74160	Gene Expression	20	2124	0.0094162	999990969512036	999990969512036	54	782	7652412173402486	9606	Homo sapiens	Gpi;Mllt4;Wars;Cycs;Igf2;Zfp36l1;Pml;Nop56;Hsd17b10;Ttc37;Bnip3l;Eif4a2;Cdkn1a;Cdkn2b		R-HSA-428293;R-HSA-429955;R-HSA-2187303;R-HSA-8865280;R-HSA-156808;R-HSA-163214;R-HSA-428296;R-HSA-6805620;R-HSA-156823;R-HSA-157849;R-HSA-6790907;R-HSA-187934;R-HSA-6790906;R-HSA-203934;R-HSA-72619;R-HSA-450474;R-HSA-72621;R-HSA-6803403;R-HSA-429992;R-HSA-6803411;R-HSA-72631;R-HSA-72635;R-HSA-69562;R-HSA-450490;R-HSA-450488;R-HSA-6803801;R-HSA-6786854;R-HSA-430021;R-HSA-72647;R-HSA-430028;R-HSA-…
R-HSA-1643685	Disease	14	1487	0.00941493	9997965296385656	9997965296385656	21	896	8767981211468832	9606	Homo sapiens	App;Cd80;Mpi;Adamts8;Phb;Cp;Hsp90ab1;Abca1;Abcd4;Gfpt1;Ogn;Cdkn1a;B2m		R-HSA-182243;R-HSA-6802915;R-HSA-182279;R-HSA-2399969;R-HSA-8863009;R-HSA-5682111;R-HSA-5683325;R-HSA-182286;R-HSA-2400009;R-HSA-5621402;R-HSA-3781832;R-HSA-8870710;R-HSA-3656230;R-HSA-182263;R-HSA-5336420;R-HSA-3656258;R-HSA-6785565;R-HSA-3656269;R-HSA-6802908;R-HSA-4085027;R-HSA-6802937
R-HSA-445355	Smooth Muscle Contraction	7	37	0	1.28362e+11	3.20905e+16	8	9	8.80712e+11	9606	Homo sapiens	Mylpf;Cav3;Tpm1;Myl6b;Mylk		R-HSA-5263633;R-HSA-445700;R-HSA-445797;R-HSA-445813;R-HSA-445699;R-HSA-5263628;R-HSA-445704;R-HSA-445705
R-HSA-1445148	Translocation of GLUT4 to the plasma membrane	8	87	0	4.57382e+12	5717278453275243	2	15	1.46785e+16	9606	Homo sapiens	Myh1;Myh3;Tubb3;Myh7		R-HSA-2316352;R-HSA-2316347
R-HSA-1989781	PPARA activates gene expression	11	177	0	1.11297e+16	1.19088e+16	6	42	4109991192876015	9606	Homo sapiens	Abca1;Me1;Fhl2;Ankrd1;Fdft1;Srl		R-HSA-1989756;R-HSA-1655850;R-HSA-1592238;R-HSA-1989765;R-HSA-1989747;R-HSA-1989779
R-HSA-400206	Regulation of lipid metabolism by Peroxisome proliferator-activated receptor alpha (PPARalpha)	11	180	0	1.27049e+16	1.19426e+16	6	45	4403561992367159	9606	Homo sapiens	Abca1;Me1;Fhl2;Ankrd1;Fdft1;Srl		R-HSA-1989756;R-HSA-1655850;R-HSA-1592238;R-HSA-1989765;R-HSA-1989747;R-HSA-1989779
R-HSA-163685	Integration of energy metabolism	7	143	0	2.77234e+16	5201597917211749	15	65	6360700655641452	9606	Homo sapiens	Acly;Adipor1;Ahcyl1;Tpk1;Akap5;Tkt;Itpr1		R-HSA-163751;R-HSA-381644;R-HSA-163691;R-HSA-381707;R-HSA-8848663;R-HSA-169683;R-HSA-169680;R-HSA-381713;R-HSA-111925;R-HSA-265682;R-HSA-163770;R-HSA-163672;R-HSA-163676;R-HSA-163741;R-HSA-163773
R-HSA-1474244	Extracellular matrix organization	10	321	0	1.19828e+16	5201597917211749	54	314	307270770134064	9606	Homo sapiens	App;Gulp1;Col11a1;P4ha1;Itga3;Casp3;Ncam1;Adamts8;Col8a1;Tkt		R-HSA-8948232;R-HSA-2002460;R-HSA-8948234;R-HSA-8944266;R-HSA-1564179;R-HSA-8948224;R-HSA-8948226;R-HSA-8948228;R-HSA-8948230;R-HSA-8948231;R-HSA-204434;R-HSA-2002440;R-HSA-2327733;R-HSA-2327738;R-HSA-2466238;R-HSA-1564169;R-HSA-2482180;R-HSA-2022073;R-HSA-2327695;R-HSA-1981104;R-HSA-1474213;R-HSA-1454757;R-HSA-1474210;R-HSA-2537499;R-HSA-2327909;R-HSA-2465890;R-HSA-2299620;R-HSA-2467436;R-HSA-14…
R-HSA-2424491	DAP12 signaling	11	392	0	1.74734e+16	5201597917211749	20	106	1.03728e+16	9606	Homo sapiens	Ahcyl1;Tpk1;Cd80;Prkce;Ncam1;Phb;Cdkn1a;Sptbn1;B2m;Itpr1;Sptan1		R-HSA-2424484;R-HSA-5672950;R-HSA-2424486;R-HSA-2424487;R-HSA-2424480;R-HSA-2424482;R-HSA-198314;R-HSA-2395439;R-HSA-111919;R-HSA-2395412;R-HSA-2316434;R-HSA-169683;R-HSA-210289;R-HSA-169680;R-HSA-5672965;R-HSA-111925;R-HSA-111924;R-HSA-2396594;R-HSA-198613;R-HSA-2395801
R-HSA-177929	Signaling by EGFR	11	402	0	1950953503440087	5201597917211749	11	139	1.36021e+16	9606	Homo sapiens	Ahcyl1;Tpk1;Cd80;Prkce;Ncam1;Phb;Cdkn1a;Sptbn1;Pag1;Itpr1;Sptan1		R-HSA-5672950;R-HSA-2316434;R-HSA-169683;R-HSA-169680;R-HSA-5672965;R-HSA-111925;R-HSA-177926;R-HSA-111924;R-HSA-198613;R-HSA-198314;R-HSA-111919
R-HSA-2172127	DAP12 interactions	11	409	0	2.09957e+16	5201597917211749	24	122	1.19385e+16	9606	Homo sapiens	Ahcyl1;Tpk1;Cd80;Prkce;Ncam1;Phb;Cdkn1a;Sptbn1;B2m;Itpr1;Sptan1		R-HSA-2424484;R-HSA-5672950;R-HSA-2424486;R-HSA-2424487;R-HSA-2424480;R-HSA-210309;R-HSA-2424482;R-HSA-198314;R-HSA-2395439;R-HSA-111919;R-HSA-2395412;R-HSA-2316434;R-HSA-169683;R-HSA-210289;R-HSA-169680;R-HSA-2272753;R-HSA-5672965;R-HSA-111925;R-HSA-111924;R-HSA-2396594;R-HSA-198613;R-HSA-2272795;R-HSA-2395801;R-HSA-2172126
R-HSA-76002	Platelet activation, signaling and aggregation	8	305	0	2.79028e+16	5201597917211749	8	114	1115569038066347	9606	Homo sapiens	App;Prkce;Igf2;Habp4;Crk;Itpr1;Bcar1;ttn;Ttn		R-HSA-372693;R-HSA-482772;R-HSA-425861;R-HSA-372705;R-HSA-139941;R-HSA-481007;R-HSA-372697;R-HSA-139854
R-HSA-187037	NGF signalling via TRKA from the plasma membrane	11	427	0	2502376463367135	5201597917211749	15	143	1.39935e+16	9606	Homo sapiens	Ahcyl1;Tpk1;Cd80;Prkce;Ncam1;Phb;Cdkn1a;Sptbn1;Crk;Itpr1;Sptan1		R-HSA-5672950;R-HSA-169891;R-HSA-169895;R-HSA-198314;R-HSA-111919;R-HSA-169901;R-HSA-2316434;R-HSA-169683;R-HSA-169904;R-HSA-169680;R-HSA-5672965;R-HSA-169905;R-HSA-111925;R-HSA-111924;R-HSA-198613
R-HSA-71387	Metabolism of carbohydrates	11	442	0	2857513359038384	5201597917211749	33	234	2.28985e+16	9606	Homo sapiens	Gpi;Pygb;Got1;Hexa;Tpk1;Ogn;Pgm3;Sord;Tkt;Pck2;Dak		R-HSA-2046175;R-HSA-2046239;R-HSA-70592;R-HSA-70272;R-HSA-2046298;R-HSA-70471;R-HSA-2105001;R-HSA-70475;R-HSA-70349;R-HSA-2162225;R-HSA-2046222;R-HSA-5662471;R-HSA-2046285;R-HSA-372819;R-HSA-71515;R-HSA-1793217;R-HSA-70427;R-HSA-71324;R-HSA-163741;R-HSA-453337;R-HSA-2025724;R-HSA-453346;R-HSA-163751;R-HSA-2025723;R-HSA-71335;R-HSA-2046265;R-HSA-6787329;R-HSA-453358;R-HSA-453356;R-HSA-5652195;R-HS…
R-HSA-4420097	VEGFA-VEGFR2 Pathway	9	372	0	3.41384e+16	5201597917211749	10	115	1.12535e+16	9606	Homo sapiens	Ahcyl1;Tpk1;Ncam1;Phb;Sptbn1;Crk;Itpr1;Bcar1;Sptan1		R-HSA-5672950;R-HSA-169683;R-HSA-169680;R-HSA-5672965;R-HSA-5218828;R-HSA-5218811;R-HSA-5218839;R-HSA-5218855;R-HSA-5218854;R-HSA-5218822
R-HSA-194138	Signaling by VEGF	9	381	0	3.66925e+16	5201597917211749	10	121	1.18407e+16	9606	Homo sapiens	Ahcyl1;Tpk1;Ncam1;Phb;Sptbn1;Crk;Itpr1;Bcar1;Sptan1		R-HSA-5672950;R-HSA-169683;R-HSA-169680;R-HSA-5672965;R-HSA-5218828;R-HSA-5218811;R-HSA-5218839;R-HSA-5218855;R-HSA-5218854;R-HSA-5218822
R-HSA-446203	Asparagine N-linked glycosylation	8	414	0	6018721789498013	6018721789498013	9	143	1.39935e+16	9606	Homo sapiens	Tubb3;Gfpt1;Mpi;Pgm3;Sptbn1;Dync1h1;Sptan1		R-HSA-6807877;R-HSA-6807875;R-HSA-6809011;R-HSA-6809010;R-HSA-449715;R-HSA-6809006;R-HSA-6809003;R-HSA-532549;R-HSA-446185
R-HSA-1852241	Organelle biogenesis and maintenance	8	428	0	6389404120306028	6389404120306028	38	96	9394265583716608	9606	Homo sapiens	Tubb3;Cycs;Srl;Dync1h1		R-HSA-5625424;R-HSA-5625426;R-HSA-1605535;R-HSA-5617816;R-HSA-5618328;R-HSA-5618331;R-HSA-5625421;R-HSA-1368140;R-HSA-2466367;R-HSA-5625416;R-HSA-5626699;R-HSA-5624949;R-HSA-5626228;R-HSA-1592249;R-HSA-1592250;R-HSA-1592252;R-HSA-2466369;R-HSA-5626227;R-HSA-2466370;R-HSA-1592242;R-HSA-5626681;R-HSA-1605428;R-HSA-1592244;R-HSA-5624952;R-HSA-1592245;R-HSA-1592246;R-HSA-5638009;R-HSA-1592247;R-HSA-1…
R-HSA-3700989	Transcriptional Regulation by TP53	9	483	0	6456533032090814	6456533032090814	16	256	2.50514e+16	9606	Homo sapiens	Gpi;Bnip3l;Cycs;Cdkn1a;Cdkn2b;Pml		R-HSA-6804998;R-HSA-6805638;R-HSA-6804996;R-HSA-70475;R-HSA-6801195;R-HSA-163214;R-HSA-6803403;R-HSA-6797993;R-HSA-6798004;R-HSA-6805620;R-HSA-6803411;R-HSA-6805650;R-HSA-69562;R-HSA-6803388;R-HSA-187934;R-HSA-6803801
R-HSA-2262752	Cellular responses to stress	9	525	0	7386729847100684	7386729847100684	22	207	2025638516488893	9606	Homo sapiens	Cycs;Prdx6;Cdkn2b;Cdkn1a;Hsp90ab1		R-HSA-182594;R-HSA-6804998;R-HSA-6804996;R-HSA-5082409;R-HSA-3209111;R-HSA-3343700;R-HSA-5324632;R-HSA-3209114;R-HSA-3786258;R-HSA-4647594;R-HSA-4647593;R-HSA-3371586;R-HSA-3788705;R-HSA-5324617;R-HSA-5082356;R-HSA-4647613;R-HSA-69562;R-HSA-3857345;R-HSA-187934;R-HSA-3341294;R-HSA-3788708;R-HSA-3857348
R-HSA-2454202	Fc epsilon receptor (FCERI) signaling	8	497	0	790558896286935	790558896286935	6	135	1.32107e+16	9606	Homo sapiens	Ahcyl1;Cd80;Ncam1;Phb;Cdkn1a;Sptbn1;Itpr1;Sptan1		R-HSA-5672950;R-HSA-2316434;R-HSA-169683;R-HSA-169680;R-HSA-5672965;R-HSA-198613
R-HSA-1640170	Cell Cycle	10	645	0	8446396108250855	8446396108250855	55	383	3747920540170271	9606	Homo sapiens	Tubb3;Ccnd1;Cdkn2b;Cdkn1a;Dync1h1;Hsp90ab1		R-HSA-187520;R-HSA-380294;R-HSA-375302;R-HSA-380303;R-HSA-1638803;R-HSA-8852362;R-HSA-187916;R-HSA-380311;R-HSA-380316;R-HSA-8848414;R-HSA-8853405;R-HSA-2468287;R-HSA-187934;R-HSA-380455;R-HSA-187552;R-HSA-8853419;R-HSA-6803403;R-HSA-75820;R-HSA-187948;R-HSA-75823;R-HSA-75822;R-HSA-75825;R-HSA-75824;R-HSA-8848436;R-HSA-187574;R-HSA-6803411;R-HSA-187575;R-HSA-187828;R-HSA-69562;R-HSA-1638821;R-HSA…
R-HSA-69278	Cell Cycle, Mitotic	8	533	0	8482495306387572	8482495306387572	51	294	2.87699e+16	9606	Homo sapiens	Tubb3;Ccnd1;Cdkn2b;Cdkn1a;Dync1h1;Hsp90ab1		R-HSA-187520;R-HSA-380294;R-HSA-375302;R-HSA-380303;R-HSA-1638803;R-HSA-8852362;R-HSA-187916;R-HSA-380311;R-HSA-380316;R-HSA-8848414;R-HSA-8853405;R-HSA-2468287;R-HSA-187934;R-HSA-380455;R-HSA-187552;R-HSA-8853419;R-HSA-75820;R-HSA-187948;R-HSA-75823;R-HSA-75822;R-HSA-75825;R-HSA-75824;R-HSA-8848436;R-HSA-187574;R-HSA-187575;R-HSA-187828;R-HSA-69562;R-HSA-1638821;R-HSA-8852280;R-HSA-182594;R-HSA-…
R-HSA-211859	Biological oxidations	8	540	0	857861535055884	857861535055884	10	185	1810353263528721	9606	Homo sapiens	Ptgis;Nnmt;Gsta6;Gsta1;Ephx1;Gstt2;Hsp90ab1		R-HSA-175987;R-HSA-76496;R-HSA-176054;R-HSA-193845;R-HSA-8937169;R-HSA-8936849;R-HSA-5694077;R-HSA-8937191;R-HSA-192157;R-HSA-193709
R-HSA-881907	Gastrin-CREB signalling pathway via PKC and MAPK	7	504	0	8869508589542792	8869508589542792	8	68	6654271455132596	9606	Homo sapiens	App;Prkce;Ncam1;Phb;Sptbn1;Itpr1;Sptan1		R-HSA-5672950;R-HSA-425861;R-HSA-5672965;R-HSA-749448;R-HSA-749452;R-HSA-139941;R-HSA-139854;R-HSA-379048
R-HSA-71291	Metabolism of amino acids and derivatives	8	635	0	9460683476312560	9460683476312560	12	247	2.41707e+16	9606	Homo sapiens	Hsd17b10;Nnmt;Mtap;Gatm;Csad;Got1;Ckm;Hibadh		R-HSA-70592;R-HSA-70837;R-HSA-2408544;R-HSA-70581;R-HSA-70885;R-HSA-508369;R-HSA-1655443;R-HSA-1237160;R-HSA-71275;R-HSA-1237102;R-HSA-200318;R-HSA-508473
R-HSA-212436	Generic Transcription Pathway	11	1042	0	9954528762189680	9954528762189680	20	353	3.45435e+16	9606	Homo sapiens	Gpi;Bnip3l;Cycs;Cdkn2b;Cdkn1a;Pml		R-HSA-6804998;R-HSA-6805638;R-HSA-6804996;R-HSA-2187303;R-HSA-8865280;R-HSA-70475;R-HSA-6801195;R-HSA-163214;R-HSA-6803403;R-HSA-6797993;R-HSA-8865256;R-HSA-6798004;R-HSA-6805620;R-HSA-6803411;R-HSA-6805650;R-HSA-69562;R-HSA-6803388;R-HSA-8865244;R-HSA-187934;R-HSA-6803801
R-HSA-372790	Signaling by GPCR	9	1504	0	9999994928065424	9999994928065424	20	326	3190136021137097	9606	Homo sapiens	App;Ahcyl1;Tpk1;Prkce;Ncam1;Phb;Sptbn1;Itpr1;Sptan1		R-HSA-5672950;R-HSA-425861;R-HSA-749448;R-HSA-749454;R-HSA-177284;R-HSA-749452;R-HSA-139941;R-HSA-751040;R-HSA-380073;R-HSA-391913;R-HSA-139854;R-HSA-379048;R-HSA-111919;R-HSA-169683;R-HSA-169680;R-HSA-5672965;R-HSA-111925;R-HSA-111924;R-HSA-177275;R-HSA-749456
R-HSA-69560	Transcriptional activation of p53 responsive genes	3	6	0	2.69976e+12	4049641416690175	4	5	4.89285e+11	9606	Homo sapiens	Cdkn1a		R-HSA-6803411;R-HSA-6803388;R-HSA-6803403;R-HSA-6803801
R-HSA-69895	Transcriptional activation of cell cycle inhibitor p21	3	6	0	2.69976e+12	4049641416690175	4	5	4.89285e+11	9606	Homo sapiens	Cdkn1a		R-HSA-6803411;R-HSA-6803388;R-HSA-6803403;R-HSA-6803801
R-HSA-5657655	MGMT-mediated DNA damage reversal	1	2	0	3968498045238633	5201597917211749	2	2	1.95714e+11	9606	Homo sapiens	Mgmt		R-HSA-5657651;R-HSA-73892
R-HSA-4043916	Defective MPI causes MPI-CDG (CDG-1b)	1	2	0	3968498045238633	5201597917211749	1	1	9.78569e+10	9606	Homo sapiens	Mpi		R-HSA-3781832
R-HSA-111457	Release of apoptotic factors from the mitochondria	1	2	0	3968498045238633	5201597917211749	1	2	1.95714e+11	9606	Homo sapiens	Cycs		R-HSA-114284
R-HSA-8866911	TFAP2 (AP-2) family regulates transcription of cell cycle factors	2	6	0	6784907039233623	4.71886e+16	3	4	3.91428e+11	9606	Homo sapiens	Cdkn1a		R-HSA-8865280;R-HSA-8865244;R-HSA-8865256
R-HSA-4085023	Defective GFPT1 causes CMSTA1	1	3	0	5893511065578416	5201597917211749	1	1	9.78569e+10	9606	Homo sapiens	Gfpt1		R-HSA-4085027
R-HSA-111461	Cytochrome c-mediated apoptotic response	2	7	0	911343251305552	4.71886e+16	5	5	4.89285e+11	9606	Homo sapiens	Casp3;Cycs		R-HSA-114256;R-HSA-114259;R-HSA-114261;R-HSA-114252;R-HSA-114254
R-HSA-111459	Activation of caspases through apoptosome-mediated cleavage	2	7	0	911343251305552	4.71886e+16	2	2	1.95714e+11	9606	Homo sapiens	Casp3;Cycs		R-HSA-114261;R-HSA-114252
R-HSA-5619060	Defective CP causes aceruloplasminemia (ACERULOP)	1	4	0	7780079208931978	5201597917211749	1	1	9.78569e+10	9606	Homo sapiens	Cp		R-HSA-5621402
R-HSA-5682113	Defective ABCA1 causes Tangier disease	1	4	0	7780079208931978	5201597917211749	1	1	9.78569e+10	9606	Homo sapiens	Abca1		R-HSA-5682111
R-HSA-5683329	Defective ABCD4 causes methylmalonic aciduria and homocystinuria, cblj type (MAHCJ)	1	4	0	7780079208931978	5201597917211749	1	1	9.78569e+10	9606	Homo sapiens	Abcd4		R-HSA-5683325
R-HSA-428542	Regulation of Commissural axon pathfinding by Slit and Robo	1	4	0	7780079208931978	5201597917211749	1	2	1.95714e+11	9606	Homo sapiens	Slit2		R-HSA-376149
R-HSA-211736	Stimulation of the cell death response by PAK-2p34	1	4	0	7780079208931978	5201597917211749	1	4	3.91428e+11	9606	Homo sapiens	Casp3		R-HSA-211651
R-HSA-111471	Apoptotic factor-mediated response	2	9	0	1.4672e+16	4.71886e+16	7	11	1076426264800861	9606	Homo sapiens	Casp3;Cycs		R-HSA-114256;R-HSA-114419;R-HSA-114259;R-HSA-114306;R-HSA-114261;R-HSA-114252;R-HSA-114254
R-HSA-111458	Formation of apoptosome	1	5	0	9628967405588174	5201597917211749	3	3	2.93571e+12	9606	Homo sapiens	Cycs		R-HSA-114256;R-HSA-114259;R-HSA-114254
R-HSA-111469	SMAC-mediated apoptotic response	1	5	0	9628967405588174	5201597917211749	2	6	5.87142e+11	9606	Homo sapiens	Casp3		R-HSA-114419;R-HSA-114306
R-HSA-111464	SMAC-mediated dissociation of IAP:caspase complexes	1	5	0	9628967405588174	5201597917211749	1	3	2.93571e+12	9606	Homo sapiens	Casp3		R-HSA-114419
R-HSA-111463	SMAC binds to IAPs	1	5	0	9628967405588174	5201597917211749	1	3	2.93571e+12	9606	Homo sapiens	Casp3		R-HSA-114306
R-HSA-844455	The NLRP1 inflammasome	1	5	0	9628967405588174	5201597917211749	1	4	3.91428e+11	9606	Homo sapiens	Bcl2l1		R-HSA-879201
R-HSA-8875656	MET receptor recycling	2	11	0	2.13474e+16	5201597917211749	2	2	1.95714e+11	9606	Homo sapiens	Crk		R-HSA-8875661;R-HSA-8875659
R-HSA-428890	Role of Abl in Robo-Slit signaling	2	12	0	2.50735e+16	5201597917211749	4	4	3.91428e+11	9606	Homo sapiens	Slit2;Cap2		R-HSA-428885;R-HSA-428883;R-HSA-376141;R-HSA-428888
R-HSA-264870	Caspase-mediated cleavage of cytoskeletal proteins	2	12	0	2.50735e+16	5201597917211749	7	10	9.78569e+11	9606	Homo sapiens	Casp3;Sptan1		R-HSA-202967;R-HSA-201639;R-HSA-201622;R-HSA-202966;R-HSA-201608;R-HSA-201629;R-HSA-201628
R-HSA-205025	NADE modulates death signalling	1	6	0	1.14409e+16	5201597917211749	1	3	2.93571e+12	9606	Homo sapiens	Casp3		R-HSA-205117
R-HSA-6804116	TP53 Regulates Transcription of Genes Involved in G1 Cell Cycle Arrest	3	19	0	7069709386193224	4.71886e+16	6	14	1369997064292005	9606	Homo sapiens	Cdkn1a		R-HSA-6803411;R-HSA-69562;R-HSA-6803388;R-HSA-187934;R-HSA-6803403;R-HSA-6803801
R-HSA-8875555	MET activates RAP1 and RAC1	2	13	0	2904305191915646	5201597917211749	5	5	4.89285e+11	9606	Homo sapiens	Crk		R-HSA-8875591;R-HSA-8875558;R-HSA-8875540;R-HSA-8875568;R-HSA-8875576
R-HSA-428359	Insulin-like Growth Factor-2 mRNA Binding Proteins (IGF2BPs/IMPs/VICKZs) bind RNA	2	13	0	2904305191915646	5201597917211749	3	3	2.93571e+12	9606	Homo sapiens	Igf2		R-HSA-428293;R-HSA-428287;R-HSA-428296
R-HSA-163358	PKA-mediated phosphorylation of key metabolic factors	1	7	0	1.32167e+16	5201597917211749	3	5	4.89285e+11	9606	Homo sapiens	Tpk1		R-HSA-163672;R-HSA-163676;R-HSA-163773
R-HSA-8849470	PTK6 Regulates Cell Cycle	1	8	0	1495697596796981	5201597917211749	2	2	1.95714e+11	9606	Homo sapiens	Ccnd1		R-HSA-8848436;R-HSA-8848414
R-HSA-1606341	IRF3 mediated activation of type 1 IFN	1	8	0	1495697596796981	5201597917211749	4	5	4.89285e+11	9606	Homo sapiens	Irf3		R-HSA-1606345;R-HSA-2032396;R-HSA-2395992;R-HSA-1606327
R-HSA-8937144	Aryl hydrocarbon receptor signalling	1	8	0	1495697596796981	5201597917211749	3	5	4.89285e+11	9606	Homo sapiens	Hsp90ab1		R-HSA-8937169;R-HSA-8936849;R-HSA-8937191
R-HSA-111453	BH3-only proteins associate with and inactivate anti-apoptotic BCL-2 members	1	8	0	1495697596796981	5201597917211749	1	3	2.93571e+12	9606	Homo sapiens	Bcl2l1		R-HSA-508162
R-HSA-3134973	LRR FLII-interacting protein 1 (LRRFIP1) activates type I IFN production	1	8	0	1495697596796981	5201597917211749	1	5	4.89285e+11	9606	Homo sapiens	Irf3		R-HSA-3134883
R-HSA-163765	ChREBP activates metabolic gene expression	1	8	0	1495697596796981	5201597917211749	1	6	5.87142e+11	9606	Homo sapiens	Acly		R-HSA-163770
R-HSA-373753	Nephrin interactions	3	25	0	1474645196753721	4.71886e+16	3	12	1.17428e+16	9606	Homo sapiens	Sptbn1;Cd2ap;Sptan1		R-HSA-451758;R-HSA-373727;R-HSA-451403
R-HSA-8875878	MET promotes cell motility	5	45	0	2.40798e+16	1.99862e+16	6	12	1.17428e+16	9606	Homo sapiens	Gulp1;Itga3;Col11a1;Crk		R-HSA-8875591;R-HSA-8875558;R-HSA-8875540;R-HSA-8875568;R-HSA-8874079;R-HSA-8875576
R-HSA-5607763	CLEC7A (Dectin-1) induces NFAT activation	2	18	0	5.21627e+16	5201597917211749	2	6	5.87142e+11	9606	Homo sapiens	Ahcyl1;Itpr1		R-HSA-169683;R-HSA-169680
R-HSA-3656225	Defective CHST6 causes MCDC1	1	9	0	166624948823191	5201597917211749	1	1	9.78569e+10	9606	Homo sapiens	Ogn		R-HSA-3656269
R-HSA-3656244	Defective B4GALT1 causes B4GALT1-CDG (CDG-2d)	1	9	0	166624948823191	5201597917211749	1	1	9.78569e+10	9606	Homo sapiens	Ogn		R-HSA-3656230
R-HSA-3656243	Defective ST3GAL3 causes MCT12 and EIEE15	1	9	0	166624948823191	5201597917211749	1	1	9.78569e+10	9606	Homo sapiens	Ogn		R-HSA-3656258
R-HSA-844456	The NLRP3 inflammasome	2	19	0	5736989011493909	5201597917211749	7	17	1663567863783149	9606	Homo sapiens	App;Hsp90ab1		R-HSA-873951;R-HSA-844440;R-HSA-1296421;R-HSA-844612;R-HSA-874087;R-HSA-844610;R-HSA-1306876
R-HSA-622312	Inflammasomes	3	29	0	2.1711e+16	5201597917211749	8	27	2.64214e+16	9606	Homo sapiens	App;Bcl2l1;Hsp90ab1		R-HSA-873951;R-HSA-844440;R-HSA-1296421;R-HSA-844612;R-HSA-874087;R-HSA-879201;R-HSA-844610;R-HSA-1306876
R-HSA-418457	cGMP effects	2	20	0	6274921190460536	5201597917211749	3	4	3.91428e+11	9606	Homo sapiens	Tpk1;Itpr1		R-HSA-418549;R-HSA-418451;R-HSA-418442
R-HSA-163754	Insulin effects increased synthesis of Xylulose-5-Phosphate	1	10	0	1833393696139769	5201597917211749	2	3	2.93571e+12	9606	Homo sapiens	Tkt		R-HSA-163751;R-HSA-163741
R-HSA-426117	Cation-coupled Chloride cotransporters	1	10	0	1833393696139769	5201597917211749	1	3	2.93571e+12	9606	Homo sapiens	Slc12a2		R-HSA-426086
R-HSA-1296052	Ca2+ activated K+ channels	1	10	0	1833393696139769	5201597917211749	1	3	2.93571e+12	9606	Homo sapiens	Pbxip1		R-HSA-1296039
R-HSA-5336415	Uptake and function of diphtheria toxin	1	10	0	1833393696139769	5201597917211749	1	5	4.89285e+11	9606	Homo sapiens	Hsp90ab1		R-HSA-5336420
R-HSA-190840	Microtubule-dependent trafficking of connexons from Golgi to the plasma membrane	2	21	0	6829175827540368	5201597917211749	1	2	1.95714e+11	9606	Homo sapiens	Tubb3		R-HSA-190520
R-HSA-8874081	MET activates PTK2 signaling	3	32	0	2.79236e+16	5201597917211749	1	5	4.89285e+11	9606	Homo sapiens	Gulp1;Itga3;Col11a1		R-HSA-8874079
R-HSA-69231	Cyclin D associated events in G1	4	43	0	1.1892e+16	4.71886e+16	8	12	1.17428e+16	9606	Homo sapiens	Ccnd1;Cdkn2b;Cdkn1a		R-HSA-182594;R-HSA-141299;R-HSA-8941915;R-HSA-69223;R-HSA-69227;R-HSA-1226094;R-HSA-1226095;R-HSA-8941895
R-HSA-69236	G1 Phase	4	43	0	1.1892e+16	4.71886e+16	8	12	1.17428e+16	9606	Homo sapiens	Ccnd1;Cdkn2b;Cdkn1a		R-HSA-182594;R-HSA-141299;R-HSA-8941915;R-HSA-69223;R-HSA-69227;R-HSA-1226094;R-HSA-1226095;R-HSA-8941895
R-HSA-381426	Regulation of Insulin-like Growth Factor (IGF) transport and uptake by Insulin-like Growth Factor Binding Proteins (IGFBPs)	2	22	0	7398888204705345	5201597917211749	13	13	1.27214e+16	9606	Homo sapiens	Igfbp5;Igf2		R-HSA-381412;R-HSA-381543;R-HSA-381446;R-HSA-381537;R-HSA-381487;R-HSA-381518;R-HSA-381545;R-HSA-381461;R-HSA-381500;R-HSA-381503;R-HSA-381496;R-HSA-381435;R-HSA-381466
R-HSA-372708	p130Cas linkage to MAPK signaling for integrins	2	22	0	7398888204705345	5201597917211749	3	3	2.93571e+12	9606	Homo sapiens	Crk;Bcar1		R-HSA-372693;R-HSA-372705;R-HSA-372697
R-HSA-2022857	Keratan sulfate degradation	2	22	0	7398888204705345	5201597917211749	3	6	5.87142e+11	9606	Homo sapiens	Hexa;Ogn		R-HSA-2046239;R-HSA-1793217;R-HSA-1638053
R-HSA-190872	Transport of connexons to the plasma membrane	2	22	0	7398888204705345	5201597917211749	1	3	2.93571e+12	9606	Homo sapiens	Tubb3		R-HSA-190520
R-HSA-164940	Nef mediated downregulation of MHC class I complex cell surface expression	1	11	0	1.9972e+16	5201597917211749	4	4	3.91428e+11	9606	Homo sapiens	B2m		R-HSA-182243;R-HSA-182279;R-HSA-182263;R-HSA-182286
R-HSA-351906	Apoptotic cleavage of cell adhesion proteins	1	11	0	1.9972e+16	5201597917211749	5	10	9.78569e+11	9606	Homo sapiens	Casp3		R-HSA-351877;R-HSA-202917;R-HSA-202939;R-HSA-202969;R-HSA-201631
R-HSA-163680	AMPK inhibits chREBP transcriptional activation activity	1	11	0	1.9972e+16	5201597917211749	2	4	3.91428e+11	9606	Homo sapiens	Adipor1		R-HSA-8848663;R-HSA-163691
R-HSA-5652227	Fructose biosynthesis	1	11	0	1.9972e+16	5201597917211749	1	2	1.95714e+11	9606	Homo sapiens	Sord		R-HSA-5652195
R-HSA-444473	Formyl peptide receptors bind formyl peptides and many other ligands	1	11	0	1.9972e+16	5201597917211749	1	3	2.93571e+12	9606	Homo sapiens	App		R-HSA-391913
R-HSA-446205	Synthesis of GDP-mannose	1	11	0	1.9972e+16	5201597917211749	1	3	2.93571e+12	9606	Homo sapiens	Mpi		R-HSA-532549
R-HSA-426486	Small interfering RNA (siRNA) biogenesis	1	11	0	1.9972e+16	5201597917211749	1	4	3.91428e+11	9606	Homo sapiens	Mllt4		R-HSA-203934
R-HSA-1489509	DAG and IP3 signaling	4	45	0	1.38286e+16	4.71886e+16	6	17	1663567863783149	9606	Homo sapiens	Ahcyl1;Tpk1;Prkce;Itpr1		R-HSA-169683;R-HSA-169680;R-HSA-111925;R-HSA-111924;R-HSA-198314;R-HSA-111919
R-HSA-167021	PLC-gamma1 signalling	4	47	0	1595458837920627	4786376513761881	6	19	1.85928e+16	9606	Homo sapiens	Ahcyl1;Tpk1;Prkce;Itpr1		R-HSA-169683;R-HSA-169680;R-HSA-111925;R-HSA-111924;R-HSA-198314;R-HSA-111919
R-HSA-212718	EGFR interacts with phospholipase C-gamma	4	47	0	1595458837920627	4786376513761881	6	20	1957138663274293	9606	Homo sapiens	Ahcyl1;Tpk1;Prkce;Itpr1		R-HSA-169683;R-HSA-169680;R-HSA-111925;R-HSA-111924;R-HSA-198314;R-HSA-111919
R-HSA-389977	Post-chaperonin tubulin folding pathway	2	24	0	8581365906242344	5201597917211749	6	9	8.80712e+11	9606	Homo sapiens	Tubb3		R-HSA-389956;R-HSA-389974;R-HSA-389969;R-HSA-389955;R-HSA-389964;R-HSA-389976
R-HSA-912631	Regulation of signaling by CBL	2	24	0	8581365906242344	5201597917211749	2	7	6.84999e+11	9606	Homo sapiens	Crk		R-HSA-912734;R-HSA-912790
R-HSA-5625970	RHO GTPases activate KTN1	1	12	0	2.15773e+16	5201597917211749	2	2	1.95714e+11	9606	Homo sapiens	Ktn1		R-HSA-5625959;R-HSA-5672083
R-HSA-418889	Ligand-independent caspase activation via DCC	1	12	0	2.15773e+16	5201597917211749	4	8	7.82855e+11	9606	Homo sapiens	Casp3		R-HSA-418852;R-HSA-418846;R-HSA-418845;R-HSA-373705
R-HSA-442720	CREB phosphorylation through the activation of Adenylate Cyclase	1	12	0	2.15773e+16	5201597917211749	1	2	1.95714e+11	9606	Homo sapiens	Tpk1		R-HSA-443474
R-HSA-193634	Axonal growth inhibition (RHOA activation)	1	12	0	2.15773e+16	5201597917211749	2	5	4.89285e+11	9606	Homo sapiens	Rtn4		R-HSA-193696;R-HSA-193655
R-HSA-71288	Creatine metabolism	2	25	0	9192538124089844	5201597917211749	2	6	5.87142e+11	9606	Homo sapiens	Gatm;Ckm		R-HSA-71275;R-HSA-200318
R-HSA-1237112	Methionine salvage pathway	2	25	0	9192538124089844	5201597917211749	2	7	6.84999e+11	9606	Homo sapiens	Mtap;Got1		R-HSA-1237160;R-HSA-1237102
R-HSA-70221	Glycogen breakdown (glycogenolysis)	2	26	0	981598040028896	5201597917211749	6	16	1.56571e+16	9606	Homo sapiens	Pygb;Pgm3		R-HSA-453346;R-HSA-453358;R-HSA-453356;R-HSA-71515;R-HSA-70427;R-HSA-453337
R-HSA-5652084	Fructose metabolism	2	26	0	981598040028896	5201597917211749	2	7	6.84999e+11	9606	Homo sapiens	Sord;Dak		R-HSA-5652195;R-HSA-70349
R-HSA-428543	Inactivation of Cdc42 and Rac	1	13	0	2.31505e+16	5201597917211749	4	4	3.91428e+11	9606	Homo sapiens	Slit2		R-HSA-428533;R-HSA-376145;R-HSA-428522;R-HSA-428536
R-HSA-211994	Sterols are 12-hydroxylated by CYP8B1	1	13	0	2.31505e+16	5201597917211749	3	3	2.93571e+12	9606	Homo sapiens	Ptgis		R-HSA-193845;R-HSA-192157;R-HSA-193709
R-HSA-2151209	Activation of PPARGC1A (PGC-1alpha) by phosphorylation	1	13	0	2.31505e+16	5201597917211749	2	2	1.95714e+11	9606	Homo sapiens	Srl		R-HSA-1592233;R-HSA-1592244
R-HSA-193697	p75NTR regulates axonogenesis	1	13	0	2.31505e+16	5201597917211749	2	7	6.84999e+11	9606	Homo sapiens	Rtn4		R-HSA-193696;R-HSA-193655
R-HSA-5627123	RHO GTPases activate PAKs	2	27	0	1.0451e+16	5201597917211749	5	13	1.27214e+16	9606	Homo sapiens	Myl6b;Mylk		R-HSA-5668932;R-HSA-445797;R-HSA-5668978;R-HSA-419232;R-HSA-5668984
[truncated: 484 more rows]

## Sheet: Cluster_5_cont_down
Pathway identifier	Pathway name	#Entities found	#Entities total	Entities ratio	Entities pValue	Entities FDR	#Reactions found	#Reactions total	Reactions ratio	Species identifier	Species name	Submitted entities found	Mapped entities	Found reaction identifiers
[truncated: 213 more rows]

[truncated: 3 more sheets: Cluster_6_late_down, Cluster_7_trans_down, Cluster_8_early_down]
