# Supplementary material for: Quantitative proteomics and systems analysis of cultured H9C2 cardiomyoblasts during differentiation over time supports a ‘function follows form’ model of differentiation
Source: Royal Society of Chemistry journal article supplement (doi:10.1039/c8mo00036k), 2018-05-17

Upregulated

Down-regulated

early

late

continuously

transiently

Cluster 4

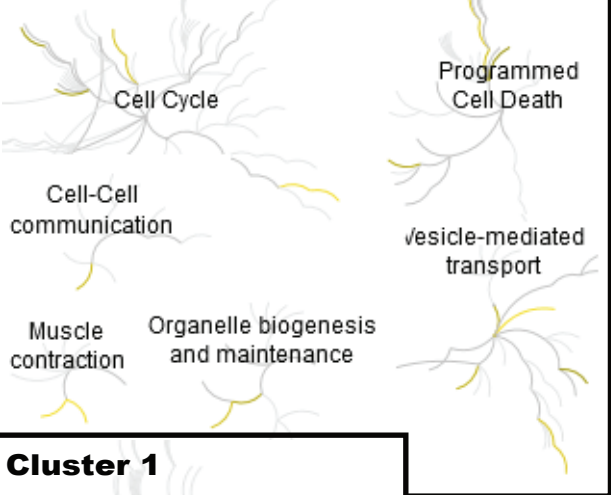

Cluster 8

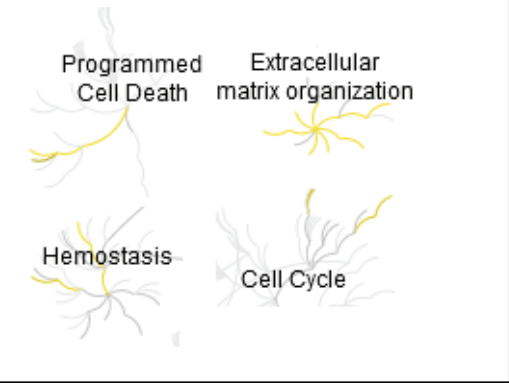

Cluster 1

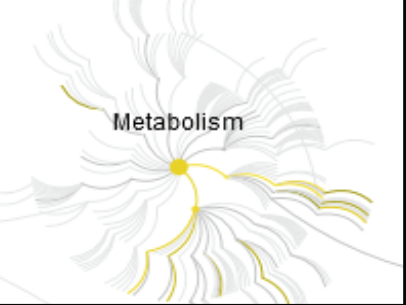

Cluster 6

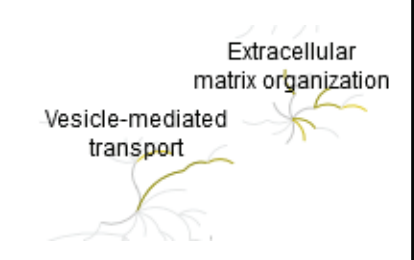

Cluster 3

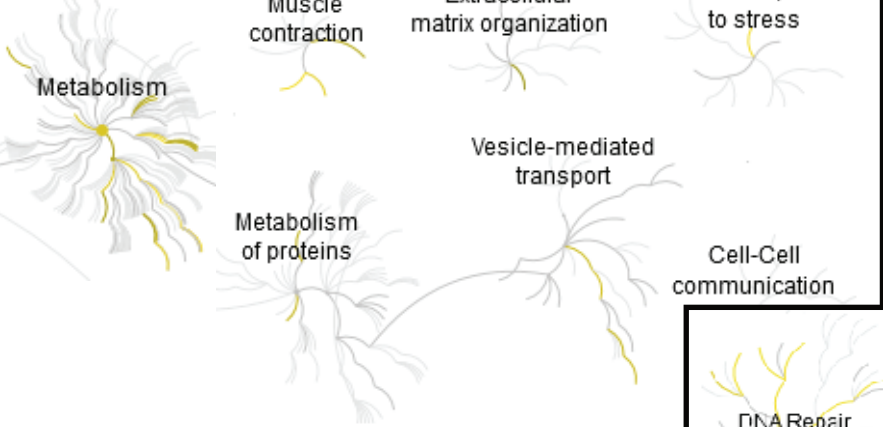

Cluster 5

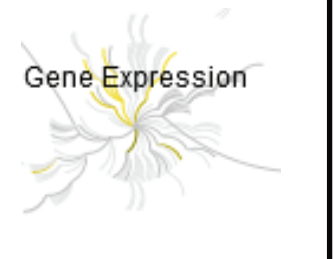

Cluster 2

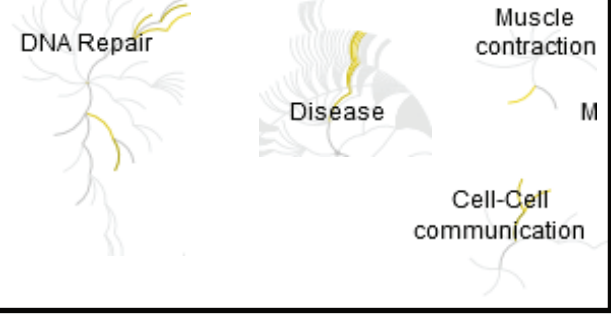

Cluster 7

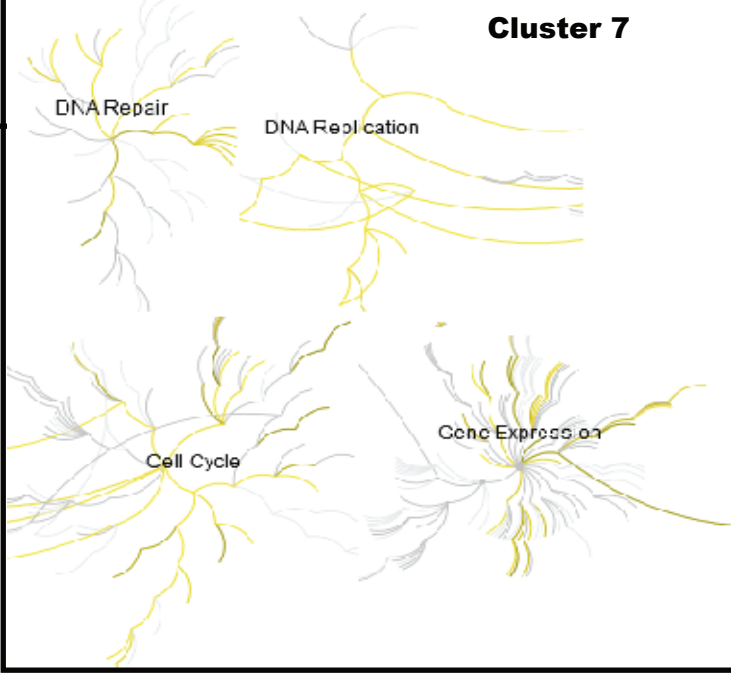

Supplement: c8mo00036k1.zip [file c8mo00036k1.zip]
