# Supplementary material for: Quantitative proteomics and systems analysis of cultured H9C2 cardiomyoblasts during differentiation over time supports a ‘function follows form’ model of differentiation
Source: Royal Society of Chemistry journal article supplement (doi:10.1039/c8mo00036k), 2018-05-17
Supplement: c8mo00036k1.zip [file c8mo00036k1.zip]

**Supplementary Table 1: Upregulated Genes D6, shotgun analysis**

| Gene names          | Protein names                                            | -LOG(P-value) | log <sub>2</sub> (ratio) | N: peptides | N: Seq. cov. [%] | N: Mol. weight [kDa] |
|---------------------|----------------------------------------------------------|---------------|--------------------------|-------------|------------------|----------------------|
| Tnnt2               | Troponin T, cardiac muscle                               | 3.85          | 4.65                     | 8           | 32               | 34                   |
| Tnni1               | Troponin I, slow skeletal muscle                         | 4.16          | 4.09                     | 5           | 24               | 22                   |
| Mylpf               | Myosin regulatory light chain 2, skeletal muscle isoform | 3.73          | 3.60                     | 10          | 75               | 19                   |
| Myh3                | Myosin-3                                                 | 4.73          | 3.56                     | 69          | 40               | 224                  |
| Myl4                | Myosin light chain 4                                     | 4.02          | 3.52                     | 8           | 61               | 21                   |
| Tnnc1               | Troponin C1                                              | 2.42          | 3.34                     | 4           | 22               | 18                   |
| ES1 protein homolog | ES1 protein homolog, mitochondrial                       | 1.46          | 2.82                     | 3           | 21               | 28                   |
| Acaa1b              | 3-ketoacyl-CoA thiolase A, peroxisoma                    | 1.52          | 2.63                     | 2           | 10               | 45                   |
| Sord                | Sorbitol dehydrogenase                                   | 4.53          | 2.62                     | 16          | 49               | 38                   |
| Cd81                | Tetraspanin;CD81 antigen                                 | 1.73          | 2.61                     | 2           | 17               | 26                   |
| Myh1                | Myosin heavy chain 1                                     | 2.12          | 2.61                     | 3           | 2                | 223                  |
| Myl6b               | Myosin light chain 6B                                    | 2.31          | 2.60                     | 3           | 17               | 23                   |
| Calu                | Calumenin                                                | 1.10          | 2.57                     | 2           | 3                | 37                   |
| Limd2               | LIM domain-containing protein 2                          | 3.34          | 2.56                     | 2           | 22               | 14                   |
| Ndufs4              | NADH dehydrogenase [ubiquinone] iron-sulfur protein 4    | 3.29          | 2.49                     | 8           | 43               | 20                   |
| Cd200               | OX-2 membrane glycoprotein                               | 3.45          | 2.41                     | 5           | 19               | 31                   |
| Col11a1             | Collagen alpha-1(XI) chain                               | 4.16          | 2.37                     | 19          | 20               | 167                  |
| Acs13               | Long-chain-fatty-acid--CoA ligase 3                      | 4.75          | 2.35                     | 11          | 23               | 79                   |
| Phldb1              | Pleckstrin homology-like domain family B member 1        | 2.76          | 2.27                     | 4           | 4                | 151                  |
| Tpm1                | Tropomyosin alpha-1 chain                                | 2.91          | 2.13                     | 1           | 6                | 33                   |
| Ston1               | Stonin 1                                                 | 3.80          | 1.94                     | 3           | 6                | 82                   |
| Mybph               | Myosin-binding protein H                                 | 3.50          | 1.84                     | 3           | 9                | 53                   |
| Enpp1               | Ectonucleotide pyrophosphatase                           | 1.36          | 1.84                     | 3           | 6                | 99                   |
| Afap1l2             | Actin Filament Associated Protein 1 Like 2               | 2.16          | 1.82                     | 2           | 3                | 91                   |
| Ldhb                | L-lactate dehydrogenase B chain                          | 5.11          | 1.82                     | 14          | 52               | 37                   |
| Col8a1              | Collagen Type VIII Alpha 1 Chain                         | 2.18          | 1.79                     | 3           | 8                | 74                   |
| Pcyox1l             | Prenylcysteine Oxidase 1 Like                            | 2.03          | 1.79                     | 2           | 7                | 55                   |
| Loxl2               | Lysyl oxidase homolog 2                                  | 3.38          | 1.77                     | 10          | 22               | 79                   |
| Akap12              | A-kinase anchor protein 12                               | 3.19          | 1.66                     | 64          | 60               | 173                  |
| Synpo               | Synaptopodin                                             | 3.64          | 1.64                     | 15          | 22               | 97                   |
| Slc25a20            | Mitochondrial carnitine                                  | 2.72          | 1.60                     | 4           | 13               | 33                   |

## Upregulated Genes D6, shotgun analysis (Cont.)

| Gene names | Protein names                                     | -LOG(P-value) | log <sub>2</sub> (ratio) | N: peptides | N: Seq. cov. [%] | N: Mol. weight [kDa] |
|------------|---------------------------------------------------|---------------|--------------------------|-------------|------------------|----------------------|
| Eln        | Elastin                                           | 3.73          | 1.40                     | 7           | 18               | 68                   |
| Tes        | Testin                                            | 3.54          | 1.40                     | 20          | 65               | 48                   |
| B2m        | Beta-2-microglobulin                              | 4.31          | 1.36                     | 3           | 32               | 14                   |
| Gm2a       | Ganglioside Activator                             | 3.58          | 1.35                     | 5           | 29               | 22                   |
| Uchl1      | Ubiquitin carboxyl-terminal hydrolase isozyme L1  | 2.52          | 1.34                     | 5           | 31               | 25                   |
| Csrp2      | Cysteine and glycine-rich protein 2               | 3.94          | 1.34                     | 9           | 59               | 21                   |
| Fhl2       | Four and a half LIM domains protein 2             | 3.54          | 1.33                     | 22          | 74               | 32                   |
| Ca3        | Carbonic anhydrase 3                              | 3.57          | 1.28                     | 17          | 85               | 29                   |
| Hexb       | Beta-hexosaminidase subunit beta                  | 2.94          | 1.25                     | 7           | 23               | 62                   |
| Hibadh     | 3-hydroxyisobutyrate dehydrogenase, mitochondrial | 4.08          | 1.20                     | 8           | 38               | 35                   |

## Downregulated Genes D6, shotgun analysis

| Gene names | Protein names                                    | -LOG(P-value) | log <sub>2</sub> (ratio) | N: peptides | N: Seq. cov. [%] | N: Mol. weight [kDa] |
|------------|--------------------------------------------------|---------------|--------------------------|-------------|------------------|----------------------|
| Cryab      | Alpha-crystallin B chain                         | 3.37          | -1.37                    | 15          | 85               | 20                   |
| Mfge8      | Lactadherin                                      | 3.72          | -1.48                    | 27          | 62               | 47                   |
| Smoc1      | SPARC Related Modular Calcium Binding 1          | 4.40          | -1.55                    | 5           | 17               | 50                   |
| Rrm1       | Ribonucleoside-diphosphate reductase             | 3.43          | -1.58                    | 5           | 7                | 90                   |
| Pcna       | Proliferating cell nuclear antigen               | 4.18          | -1.59                    | 10          | 51               | 29                   |
| Hmgb2      | High mobility group protein B2                   | 2.98          | -1.63                    | 4           | 26               | 24                   |
| Prkcdbp    | Protein kinase C delta-binding protein           | 4.26          | -1.68                    | 6           | 28               | 28                   |
| Mcm2       | DNA helicase                                     | 4.03          | -1.70                    | 3           | 4                | 102                  |
| Lgalsl     | Galectin                                         | 1.61          | -1.77                    | 3           | 26               | 19                   |
| S100a4     | Protein S100-A4                                  | 2.31          | -1.80                    | 6           | 43               | 12                   |
| Cdk1       | Cyclin-dependent kinase 1                        | 4.09          | -1.91                    | 7           | 28               | 34                   |
| Mcm7       | DNA helicase                                     | 2.46          | -1.94                    | 13          | 21               | 81                   |
| Mcm4       | Minichromosome Maintenance Complex Component 4   | 3.08          | -1.96                    | 9           | 16               | 97                   |
| Grem2      | Gremlin                                          | 3.59          | -2.01                    | 4           | 33               | 19                   |
| Mcm3       | DNA helicase                                     | 3.24          | -2.05                    | 13          | 20               | 92                   |
| Adrm1      | Proteasomal ubiquitin receptor ADRM1             | 1.62          | -2.09                    | 3           | 11               | 42                   |
| Anxa8      | Annexin A8                                       | 1.26          | -2.17                    | 5           | 26               | 37                   |
| A1m        | Alpha-1-macroglobulin                            | 1.50          | -2.20                    | 4           | 2                | 167                  |
| Smc2       | Structural maintenance of chromosomes protein    | 3.16          | -2.26                    | 3           | 5                | 134                  |
| Gpc6       | Glypican 6                                       | 2.27          | -2.33                    | 4           | 14               | 63                   |
| Mad2l1     | Mitotic spindle assembly checkpoint protein      | 3.23          | -2.62                    | 3           | 12               | 24                   |
| Spats2l    | SPATS2-like protein                              | 2.92          | -2.74                    | 3           | 5                | 66                   |
| Ptpn9      | Tyrosine-protein phosphatase non-receptor type 9 | 1.90          | -2.80                    | 2           | 5                | 62                   |
| Mcm6       | DNA helicase                                     | 2.76          | -2.97                    | 12          | 18               | 93                   |
| Gpx1       | Glutathione peroxidase 1                         | 3.73          | -3.08                    | 4           | 32               | 22                   |
