# Supplementary material for: Quantitative proteomics and systems analysis of cultured H9C2 cardiomyoblasts during differentiation over time supports a ‘function follows form’ model of differentiation
Source: Royal Society of Chemistry journal article supplement (doi:10.1039/c8mo00036k), 2018-05-17
Supplement: c8mo00036k1.zip [file c8mo00036k1.zip]

## Upregulated Genes D8, fractionation analysis

| Gene names | Protein names                                           | -LOG(P-value) | log <sub>2</sub> (ratio) | N: peptides | N: Seq. cov. [%] | N: Mol. weight [kDa] |
|------------|---------------------------------------------------------|---------------|--------------------------|-------------|------------------|----------------------|
| Akap5      | A-kinase anchor protein 5                               | 2.65          | 4.47                     | 29          | 29               | 76                   |
| Adamts8    | ADAM Metallopeptidase w. Thrombospondin Type 1 Motif 8  | 3.10          | 4.31                     | 21.1        | 20               | 87                   |
| Srl        | Sarcalumenin                                            | 3.36          | 4.30                     | 30          | 30               | 98                   |
| Pygm       | Alpha-1,4 glucan phosphorylase                          | 1.17          | 3.99                     | 35.9        | 36               | 97                   |
| Tnni1      | Troponin I, slow skeletal muscle                        | 3.00          | 3.66                     | 41          | 41               | 22                   |
| Etl4       | Epilepsy, Occipitotemporal Lobe, And Migraine With Aura | 2.60          | 3.66                     | 14.7        | 15               | 215                  |
| Acta1      | Actin, alpha skeletal muscle                            | 3.63          | 3.57                     | 11          | 11               | 42                   |
| Mybph      | Myosin-binding protein H                                | 5.40          | 3.52                     | 66.9        | 67               | 53                   |
| Des        | Desmin                                                  | 2.23          | 3.51                     | 44          | 44               | 53                   |
| Akap12     | A-kinase anchor protein 12                              | 5.74          | 3.47                     | 77.1        | 1                | 173                  |
| Cp         | Ceruloplasmin                                           | 3.46          | 3.44                     | 23          | 23               | 121                  |
| Pkp2       | plakophilin 2                                           | 3.52          | 3.28                     | 8.1         | 8                | 89                   |
| Csad       | Cysteine sulfinic acid decarboxylase                    | 3.21          | 3.12                     | 28          | 28               | 55                   |
| Cav3       | Caveolin-3                                              | 1.64          | 3.09                     | 21.9        | 22               | 17                   |
| Tnnt2      | Troponin T, cardiac muscle                              | 4.70          | 3.06                     | 43          | 43               | 34                   |
| Mb         | Myoglobin                                               | 2.36          | 2.88                     | 57.1        | 57               | 17                   |
| Sord       | Sorbitol dehydrogenase                                  | 5.48          | 2.79                     | 65          | 57               | 38                   |
| Clu        | Clusterin                                               | 2.60          | 2.78                     | 26.4        | 26               | 51                   |
| Sgcd       | Delta-sarcoglycan                                       | 2.54          | 2.75                     | 19          | 19               | 32                   |
| Snap91     | Clathrin coat assembly protein AP180                    | 5.57          | 2.69                     | 12          | 12               | 91                   |
| Bcam       | Basal cell adhesion molecule                            | 2.45          | 2.67                     | 16          | 16               | 68                   |
| Igfbp5     | Insulin-like growth factor-binding protein 5            | 2.65          | 2.65                     | 26.6        | 27               | 30                   |
| Ldb3       | LIM domain binding 3                                    | 4.66          | 2.61                     | 5           | 5                | 72                   |
| Tnnc2      | Troponin C2                                             | 3.26          | 2.60                     | 64.4        | 64               | 18                   |
| Myh1       | Myosine heavy Chain 1                                   | 5.12          | 2.57                     | 35          | 1                | 223                  |
| Ogn        | Osteoglycin                                             | 3.76          | 2.55                     | 25.8        | 26               | 34                   |
| Tnnt3      | Troponin T, fast skeletal muscle                        | 5.47          | 2.54                     | 35          | 30               | 30                   |

## Upregulated Genes D8, fractionation analysis, cont.

| Gene names | Protein names                                | -LOG(P-value) | log <sub>2</sub> (ratio) | N: peptides | N: Seq. cov. [%] | N: Mol. weight [kDa] |
|------------|----------------------------------------------|---------------|--------------------------|-------------|------------------|----------------------|
| Gsta6      | Glutathione S-transferase A6                 | 3.30          | 2.49                     | 26.1        | 26               | 26                   |
| Smyd1      | SET And MYND Domain Containing 1             | 2.71          | 2.48                     | 17          | 17               | 57                   |
| Tnni2      | Troponin I, fast skeletal muscle             | 2.07          | 2.47                     | 37.9        | 38               | 21                   |
| Myl4       | Myosin light chain 4                         | 4.78          | 2.47                     | 88          | 77               | 21                   |
| Tceal5     | Transcription elongation factor A like 5     | 5.54          | 2.43                     | 38.5        | 39               | 22                   |
| Afap1l2    | Actin Filament Associated Protein 1 Like 2   | 3.99          | 2.36                     | 37          | 37               | 93                   |
| Itgb1bp2   | Integrin Subunit Beta 1 Binding Protein 2    | 2.68          | 2.36                     | 26.1        | 26               | 39                   |
| Unc45b     | Unc-45 Myosin Chaperone B                    | 5.44          | 2.34                     | 63          | 63               | 103                  |
| Cda        | Cytidine deaminase                           | 1.94          | 2.27                     | 31.5        | 32               | 16                   |
| Tpm1       | Tropomyosin alpha-1 chain                    | 2.83          | 2.24                     | 10          | 6                | 33                   |
| Ephx1      | Epoxide hydrolase 1                          | 4.27          | 2.21                     | 51          | 51               | 53                   |
| Tmem38a    | Trimeric intracellular cation channel type A | 2.47          | 2.20                     | 20          | 20               | 33                   |
| Myh3       | Myosin-3                                     | 4.91          | 2.19                     | 64          | 32               | 224                  |
| Cd200      | OX-2 membrane glycoprotein                   | 3.13          | 2.17                     | 25          | 25               | 31                   |
| Hspb2      | Heat shock protein beta-2                    | 2.53          | 2.14                     | 58.2        | 58               | 20                   |
| Palmd      | Palmdelphin                                  | 4.13          | 2.11                     | 50          | 50               | 62                   |
| Ckm        | Creatine kinase M-type                       | 3.67          | 2.09                     | 59.1        | 59               | 43                   |
| Myh7       | Myosin-7                                     | 3.14          | 2.07                     | 3           | 2                | 223                  |
| Ldhb       | L-lactate dehydrogenase B chain              | 3.86          | 2.05                     | 59.3        | 59               | 37                   |
| Ttn        | Titin                                        | 4.78          | 2.04                     | 10          | 10               | 120                  |
| Osbp16     | Oxysterol-binding protein                    | 3.35          | 2.03                     | 17.7        | 18               | 106                  |
| Tnnc1      | Troponin C1                                  | 2.88          | 2.02                     | 55          | 55               | 18                   |
| Synpo      | Synaptopodin                                 | 5.05          | 1.97                     | 43.8        | 11               | 97                   |
| Npr3       | Atrial natriuretic peptide receptor 3        | 4.30          | 1.95                     | 44          | 44               | 60                   |

## Upregulated Genes D8, fractionation analysis, cont.

| Gene names  | Protein names                                            | -LOG(P-value) | log <sub>2</sub> (ratio) | N: peptides | N: Seq. cov. [%] | N: Mol. weight [kDa] |
|-------------|----------------------------------------------------------|---------------|--------------------------|-------------|------------------|----------------------|
| Gatm        | Glycine amidinotransferase, mitochondrial                | 3.03          | 1.94                     | 39.2        | 39               | 48                   |
| Scoc        | Short coiled-coil protein                                | 2.25          | 1.93                     | 15          | 15               | 14                   |
| Cdkn2b      | Cyclin-dependent kinase 4 inhibitor B                    | 4.38          | 1.92                     | 57.4        | 57               | 13                   |
| Mylpf       | Myosin regulatory light chain 2, skeletal muscle isoform | 3.20          | 1.91                     | 86          | 86               | 19                   |
| Anxa3       | Annexin;Annexin A3                                       | 5.81          | 1.86                     | 75.9        | 76               | 36                   |
| Col11a1     | Collagen alpha-1(XI) chain                               | 4.43          | 1.83                     | 36          | 34               | 181                  |
| Synpo2l     |                                                          | 3.31          | 1.82                     | 17.9        | 18               | 103                  |
| Gsta1;Gsta3 | Glutathione S-transferase                                | 3.21          | 1.81                     | 60          | 53               | 25                   |
| Sema3c      | Semaphorin 3C                                            | 3.36          | 1.73                     | 35.6        | 36               | 85                   |
| Atp2a1      | Calcium-transporting ATPase                              | 3.40          | 1.72                     | 32          | 25               | 109                  |
| Klhl41      | Kelch-like protein 41                                    | 3.62          | 1.72                     | 55.6        | 56               | 68                   |
| Lmod3       | Leiomodin-3                                              | 3.14          | 1.71                     | 19          | 19               | 66                   |
| F3          | Tissue factor                                            | 3.63          | 1.66                     | 23.7        | 24               | 34                   |
| Ldb3        | LIM domain binding 3                                     | 3.86          | 1.66                     | 45          | 11               | 77                   |
| Bcar1       | Breast cancer anti-estrogen resistance protein 1         | 3.97          | 1.56                     | 36.4        | 2                | 104                  |

## Downregulated Genes D8, fractionation analysis

| Gene names | Protein names                                              | -LOG(P-value) | log <sub>2</sub> (ratio) | N: peptides | N: Seq. cov. [%] | N: Mol. weight [kDa] |
|------------|------------------------------------------------------------|---------------|--------------------------|-------------|------------------|----------------------|
| Loxl1      | Lysyl oxidase homolog 1                                    | 3.87          | -1.57                    | 18          | 18               | 67                   |
| Ehd2       | EH domain-containing protein 2                             | 5.72          | -1.62                    | 75.7        | 71               | 61                   |
| Igfbp7     | Insulin-like growth factor binding protein 7               | 3.43          | -1.62                    | 36          | 9                | 29                   |
| Thy1       | Thy-1 membrane glycoprotein                                | 3.45          | -1.64                    | 33.5        | 34               | 18                   |
| Efemp2     | EGF containing fibulin like extracellular matrix protein 2 | 5.14          | -1.65                    | 39          | 39               | 49                   |
| Fbn1       | Fibrillin-1                                                | 3.99          | -1.65                    | 42.4        | 42               | 312                  |
| Sncg       | Gamma-synuclein                                            | 3.99          | -1.67                    | 66          | 66               | 13                   |
| Plaur      | Urokinase plasminogen activator surface receptor           | 3.48          | -1.68                    | 14.1        | 14               | 36                   |
| Emilin1    | Emilin1 elastin microfibril interfacier 1                  | 4.56          | -1.74                    | 53          | 53               | 95                   |
| Prkcdbp    | Protein kinase C delta-binding protein                     | 3.67          | -1.75                    | 52.5        | 53               | 28                   |
| Grb14      | Growth factor receptor-bound protein 14                    | 3.67          | -1.79                    | 31          | 31               | 61                   |
| Fn1        | Fibronectin;Anastellin                                     | 4.20          | -1.83                    | 67.9        | 2                | 272                  |
| Synm       | Synemin                                                    | 5.76          | -1.89                    | 9           | 9                | 141                  |
| Cd63       | Tetraspanin;CD63 antigen                                   | 3.00          | -1.93                    | 40          | 40               | 14                   |
| Iqgap3     | Ras GTPase-activating-like protein 3                       | 2.43          | -1.97                    | 5.4         | 5                | 185                  |
| Mfge8      | Lactadherin                                                | 4.47          | -1.99                    | 72          | 72               | 47                   |
| Fbln5      | Fibulin-5                                                  | 3.80          | -2.08                    | 29.7        | 30               | 50                   |
| Myo7a      | Myosin-VIIa                                                | 4.56          | -2.23                    | 35          | 33               | 251                  |
| Tpst2      | Protein-tyrosine sulfotransferase 2                        | 3.70          | -2.31                    | 11.4        | 11               | 42                   |
| Atp2b4     | Calcium-transporting ATPase                                | 3.15          | -2.38                    | 17          | 17               | 129                  |
| Tgfb1      | Transforming growth factor beta-1                          | 2.96          | -2.41                    | 19.2        | 19               | 44                   |
| Tspan7     | Tetraspanin                                                | 3.71          | -2.41                    | 11          | 11               | 22                   |
| Nrp2       | Neuropilin-2                                               | 3.10          | -2.41                    | 19.9        | 20               | 104                  |
| F13a1      | Coagulation factor XIII A chain                            | 1.99          | -2.69                    | 16          | 16               | 83                   |
| Lama4      | Laminin, alpha 4                                           | 3.19          | -2.83                    | 8           | 8                | 197                  |

### Downregulated Genes D8, fractionation analysis, cont.

| Gene names | Protein names                                                   | -LOG(P-value) | log <sub>2</sub> (ratio) | N: peptides | N: Seq. cov. [%] | N: Mol. weight [kDa] |
|------------|-----------------------------------------------------------------|---------------|--------------------------|-------------|------------------|----------------------|
| Bmper      | Binding Endothelial Regulator                                   | 1.51          | -2.99                    | 11          | 11               | 76                   |
| Kif15      | Kinesin-like protein KIF15                                      | 3.23          | -3.01                    | 6.2         | 6                | 160                  |
| Gmpr       | GMP reductase;GMP reductase 1                                   | 2.77          | -3.01                    | 46          | 43               | 37                   |
| Postn      | Periostin                                                       | 3.10          | -3.09                    | 48          | 32               | 90                   |
| Serpine1   | Plasminogen activator inhibitor 1                               | 3.59          | -3.28                    | 25.4        | 25               | 45                   |
| Glul       | Glutamine synthetase                                            | 4.85          | -3.38                    | 28          | 28               | 42                   |
| Zbtb8os    | ZBTB8OS zinc finger and BTB domain containing 8 opposite strand | 1.34          | -3.48                    | 23.4        | 23               | 20                   |
| Gpx1       | Glutathione peroxidase 1                                        | 3.55          | -3.50                    | 59          | 59               | 22                   |
| A1m        | Alpha-1-macroglobulin                                           | 2.26          | -4.11                    | 4.1         | 4                | 167                  |
| Fbln2      | Fibulin 2                                                       | 2.45          | -4.39                    | 15          | 15               | 131                  |
| Kcng4      | KCNQ4 potassium voltage-gated channel subfamily Q member 4      | 1.06          | -4.49                    | 4.7         | 5                | 57                   |
| Anxa8      | Annexin A8                                                      | 4.76          | -4.53                    | 64          | 64               | 37                   |
| Trim47     | Tripartite motif-containing protein 47                          | 2.98          | -4.56                    | 24.3        | 24               | 70                   |
| Hspb7      | heat shock protein family B (small) member 7                    | 4.73          | -4.91                    | 41          | 41               | 19                   |
