# Supplementary material for: Quantitative proteomics and systems analysis of cultured H9C2 cardiomyoblasts during differentiation over time supports a ‘function follows form’ model of differentiation
Source: Royal Society of Chemistry journal article supplement (doi:10.1039/c8mo00036k), 2018-05-17
Supplement: c8mo00036k1.zip [file c8mo00036k1.zip]

**Supplementary Table 3: Upregulated Genes D13 vs D0, fractionation analysis**

| Gene names | Protein names                                    | -LOG(P-value) | log <sub>2</sub> (ratio) | N: peptides | N: Seq. cov. [%] | N: Mol. weight [kDa] |
|------------|--------------------------------------------------|---------------|--------------------------|-------------|------------------|----------------------|
| S100g      | Protein S100-G                                   | 3.63          | 5.16                     | 39          | 39               | 9                    |
| Ca1        | Carbonic anhydrase 1                             | 3.31          | 4.49                     | 42.1        | 42               | 28                   |
| Myom2      | Myomesin 2                                       | 1.89          | 3.49                     | 13          | 13               | 165                  |
| Maob       | Amine oxidase [flavin-containing] B              | 1.60          | 3.47                     | 2.9         | 3                | 58                   |
| Jsrp1      | Junctional Sarcoplasmic Reticulum Protein 1      | 1.48          | 3.28                     | 25          | 25               | 37                   |
| Glb1l2     | Beta-galactosidase                               | 2.69          | 3.06                     | 13.7        | 14               | 74                   |
| Dcn        | Decorin                                          | 1.40          | 3.05                     | 18          | 18               | 40                   |
| Cmtm3      | CKLF-like MARVEL transmembrane domain-containing | 1.31          | 2.98                     | 8.2         | 8                | 20                   |
| Tceal5     | Transcription elongation factor A protein-like 5 | 2.95          | 2.72                     | 39          | 39               | 22                   |
| Abca1      | ATP binding cassette subfamily A member 1        | 2.10          | 2.67                     | 6           | 6                | 254                  |
| Rab3a      | Ras-related protein Rab-3A                       | 2.06          | 2.64                     | 14          | 14               | 25                   |
| Rps6kb2    | Ribosomal protein S6 kinase                      | 2.48          | 2.62                     | 4.3         | 3                | 54                   |
| Rnf170     | E3 ubiquitin-protein ligase                      | 1.84          | 2.61                     | 16          | 16               | 30                   |
| Wnk3       | WNK lysine deficient protein kinase 3            | 2.77          | 2.61                     | 1.5         | 1                | 186                  |
| Uchl1      | Ubiquitin carboxyl-terminal hydrolase isozyme L1 | 3.42          | 2.51                     | 52          | 52               | 25                   |
| Myl6b      | Myosin light chain 6B                            | 4.00          | 2.48                     | 75.8        | 70               | 23                   |
| Add3       | Gamma-adducin                                    | 1.68          | 2.48                     | 23          | 23               | 75                   |
| Cxcl12     | C-X-C motif chemokine ligand 12                  | 2.45          | 2.47                     | 33.7        | 34               | 10                   |
| Prune2     | Protein prune homolog 2                          | 1.76          | 2.46                     | 7           | 7                | 37                   |
| Spp1       | Osteopontin                                      | 1.83          | 2.45                     | 12.3        | 12               | 35                   |
| Hsd17b8    | Estradiol 17-beta-dehydrogenase 8                | 2.31          | 2.44                     | 29          | 29               | 27                   |
| S100a13    | S100 calcium binding protein A13                 | 3.40          | 2.39                     | 31.6        | 32               | 11                   |
| Lym1       | LYR motif-containing protein 1                   | 2.12          | 2.38                     | 18          | 18               | 14                   |
| Vsn1       | Visinin-like protein 1                           | 2.06          | 2.21                     | 31.4        | 31               | 22                   |
| Acsl3      | Long-chain-fatty-acid--CoA ligase 3              | 4.05          | 2.17                     | 54          | 54               | 80                   |

## Upregulated Genes D13 vs D0, fractionation analysis, cont

| Gene names | Protein names                                         | -LOG(P-value) | log <sub>2</sub> (ratio) | N: peptides | N: Seq. cov. [%] | N: Mol. weight [kDa] |
|------------|-------------------------------------------------------|---------------|--------------------------|-------------|------------------|----------------------|
| Msln       | Mesothelin                                            | 2.24          | 2.10                     | 6           | 6                | 69                   |
| Gm2a       | Ganglioside GM2 activator precursor                   | 4.04          | 2.04                     | 28.6        | 29               | 22                   |
| Bdh1       | D-beta-hydroxybutyrate dehydrogenase, mitochondrial   | 2.66          | 2.04                     | 43          | 43               | 38                   |
| Mettl7a    | methyltransferase like 7A                             | 2.46          | 2.04                     | 23.8        | 24               | 28                   |
| Gcat       | glycine C-acetyltransferase                           | 2.98          | 2.02                     | 25          | 25               | 45                   |
| Myl1       | Myosin light chain 1/3, skeletal muscle isoform       | 2.67          | 2.01                     | 50.8        | 44               | 21                   |
| Fxn        | Frataxin, mitochondrial                               | 3.69          | 1.98                     | 34          | 34               | 23                   |
| Isca1      | Iron-sulfur cluster assembly 1 homolog, mitochondrial | 2.24          | 1.96                     | 31          | 31               | 14                   |
| Psmb9      | Proteasome subunit beta type-9                        | 2.38          | 1.94                     | 9           | 9                | 23                   |
| Arg2       | Arginase                                              | 2.10          | 1.94                     | 16.4        | 16               | 39                   |
| Rbm24      | an RNA-binding protein and a target of p53            | 2.11          | 1.94                     | 20          | 20               | 25                   |
| Rtn4       | Reticulon-4                                           | 3.43          | 1.93                     | 61          | 45               | 126                  |
| Lpcat3     | Lysophospholipid acyltransferase 5                    | 2.84          | 1.93                     | 18          | 18               | 56                   |
| Col8a1     | Collagen alpha-1(VIII) chain precursor                | 4.34          | 1.87                     | 27.2        | 27               | 74                   |
| Stbd1      | Starch-binding domain-containing protein 1            | 3.01          | 1.76                     | 50          | 50               | 35                   |
| Cd81       | Tetraspanin;CD81 antigen                              | 3.94          | 1.75                     | 25          | 25               | 26                   |
| Ankrd1     | Ankyrin repeat domain-containing protein 1            | 4.03          | 1.73                     | 44          | 44               | 36                   |
| Fas        | Tumor necrosis factor receptor superfamily member 6   | 3.47          | 1.66                     | 12.3        | 12               | 37                   |
| Dhcr7      | 7-dehydrocholesterol reductase                        | 3.62          | 1.64                     | 11          | 11               | 54                   |
| Fdft1      | Squalene synthase                                     | 3.78          | 1.64                     | 28.4        | 28               | 48                   |
| Dcakd      | Dephospho-CoA kinase domain-containing protein        | 4.85          | 1.63                     | 47          | 47               | 27                   |
| Hprt1      | Hypoxanthine-guanine phosphoribosyltransferase        | 3.63          | 1.63                     | 77.5        | 78               | 24                   |
| Mgmt       | Methylated-DNA--protein-cysteine methyltransferase    | 4.09          | 1.61                     | 45          | 45               | 22                   |
| Lipa       | Lipase                                                | 3.81          | 1.60                     | 36.3        | 36               | 45                   |
| Itga3      | Integrin alpha 3                                      | 4.49          | 1.58                     | 30          | 30               | 117                  |

## Upregulated Genes D13 vs D0, fractionation analysis, cont

| Gene names | Protein names                                               | -LOG(P-value) | log <sub>2</sub> (ratio) | N: peptides | N: Seq. cov. [%] | N: Mol. weight [kDa] |
|------------|-------------------------------------------------------------|---------------|--------------------------|-------------|------------------|----------------------|
| Lrba       | Lipopolysaccharide-responsive and beige-like anchor protein | 4.19          | 1.56                     | 16          | 16               | 310                  |
| Rfk        | Riboflavin kinase                                           | 3.90          | 1.55                     | 63.2        | 63               | 17                   |
| Ca3        | Carbonic anhydrase 3                                        | 4.38          | 1.53                     | 87          | 87               | 29                   |
| Ehd4       | EH domain-containing protein 4                              | 4.72          | 1.48                     | 65.4        | 57               | 61                   |

## Downregulated Genes D13 vs D0, fractionation analysis, cont.

| Gene names | Protein names                                        | -LOG(P-value) | log <sub>2</sub> (ratio) | N: peptides | N: Seq. cov. [%] | N: Mol. weight [kDa] |
|------------|------------------------------------------------------|---------------|--------------------------|-------------|------------------|----------------------|
| Sun2       | SUN domain-containing protein 2                      | 3.64          | -1.56                    | 30          | 30               | 82                   |
| Smoc1      | SPARC related modular calcium binding 1              | 3.47          | -1.62                    | 17          | 17               | 50                   |
| Mcm2       | DNA helicase                                         | 3.91          | -1.66                    | 24          | 24               | 102                  |
| Sdc2       | Syndecan;Syndecan-2                                  | 4.61          | -1.71                    | 29.4        | 29               | 23                   |
| Cav2       | Caveolin                                             | 2.99          | -1.73                    | 11          | 11               | 18                   |
| Frg1       | Facioscapulohumeral muscular dystrophy region gene-1 | 2.67          | -1.75                    | 24.8        | 25               | 29                   |
| Lig3       | DNA ligase                                           | 5.36          | -1.78                    | 13          | 13               | 105                  |
| Hmg1l1     | High mobility group protein B1                       | 3.40          | -1.79                    | 37.6        | 30               | 25                   |
| Cdk1       | Cyclin-dependent kinase 1                            | 2.38          | -1.81                    | 46          | 42               | 34                   |
| Cryab      | Alpha-crystallin B chain                             | 4.52          | -1.82                    | 70.3        | 70               | 20                   |
| Smtn       | Smoothelin                                           | 4.46          | -1.82                    | 47          | 46               | 100                  |
| Srsf4      | Serine/arginine-rich splicing factor 4               | 3.41          | -1.83                    | 12.1        | 12               | 56                   |
| Gli3       | Transcriptional activator GLI3                       | 2.41          | -1.84                    | 3           | 3                | 172                  |
| Tm9sf1     | Transmembrane 9 superfamily member 1                 | 2.77          | -1.86                    | 7           | 7                | 67                   |
| Cdkn2c     | cyclin-dependent kinase inhibitor 2C                 | 2.23          | -1.87                    | 17          | 17               | 18                   |
| Trps1      | TRPS1 transcriptional repressor GATA binding 1       | 4.31          | -1.89                    | 8           | 8                | 141                  |
| Hmgb3      | High mobility group protein B3                       | 2.76          | -1.91                    | 17          | 17               | 23                   |
| Mcm7       | DNA helicase                                         | 2.35          | -1.94                    | 16.6        | 17               | 81                   |
| Ccdc9      | Coiled-coil domain-containing protein 9              | 2.20          | -1.95                    | 7           | 7                | 66                   |
| Cystm1     | cysteine rich transmembrane module containing 1      | 2.77          | -1.96                    | 10.9        | 11               | 11                   |
| Adamtsl3   | ADAMTS-like protein 3 precursor                      | 3.81          | -2.02                    | 13          | 13               | 187                  |
| Ctbp2      | C-terminal-binding protein 2                         | 3.75          | -2.07                    | 14.6        | 15               | 49                   |
| Smc2       | Structural maintenance of chromosomes protein        | 3.69          | -2.08                    | 20          | 20               | 134                  |
| Tax1bp3    | Tax1-binding protein 3                               | 1.97          | -2.08                    | 21.4        | 21               | 11                   |
| Ubr7       | ubiquitin protein ligase E3 component n-recognin 7   | 2.20          | -2.12                    | 12          | 12               | 48                   |

## Downregulated Genes D13 vs D0, fractionation analysis, cont.

| Gene names | Protein names                                           | -LOG(P-value) | log <sub>2</sub> (ratio) | N: peptides | N: Seq. cov. [%] | N: Mol. weight [kDa] |
|------------|---------------------------------------------------------|---------------|--------------------------|-------------|------------------|----------------------|
| Stmn1      | Stathmin                                                | 3.75          | -2.14                    | 52          | 46               | 17                   |
| Fst        | Follistatin                                             | 3.92          | -2.16                    | 34          | 34               | 38                   |
| Pak3       | Serine/threonine-protein kinase                         | 2.04          | -2.20                    | 16          | 16               | 61                   |
| Pold3      | DNA polymerase delta subunit 3                          | 2.56          | -2.22                    | 7.6         | 8                | 51                   |
| Lyn        | Tyrosine-protein kinase Lyn                             | 2.06          | -2.29                    | 12          | 12               | 56                   |
| Ncbp2      | Nuclear cap-binding protein subunit 2                   | 3.01          | -2.33                    | 39          | 39               | 18                   |
| Arf2       | ADP-ribosylation factor 2                               | 1.55          | -2.37                    | 15.5        | 16               | 21                   |
| Plin4      | Perilipin-4                                             | 2.09          | -2.38                    | 29          | 29               | 141                  |
| Trip13     | Pachytene checkpoint protein 2 homolog                  | 3.14          | -2.39                    | 16.4        | 16               | 48                   |
| Wisp1      | WNT1-inducible-signaling pathway protein 1              | 1.74          | -2.41                    | 16          | 16               | 41                   |
| Mcm3       | DNA helicase                                            | 2.41          | -2.44                    | 44.5        | 45               | 92                   |
| Pik3r2     | Phosphatidylinositol 3-kinase regulatory subunit beta   | 2.20          | -2.53                    | 4           | 4                | 81                   |
| Ncaph      | Condensin complex subunit 2                             | 1.90          | -2.56                    | 21.7        | 22               | 82                   |
| S100a4     | Protein S100-A4                                         | 2.39          | -2.57                    | 43          | 43               | 12                   |
| Aqp1       | Aquaporin-1                                             | 2.09          | -2.61                    | 13.4        | 13               | 29                   |
| Hist1h1b   | Histone H1.5                                            | 2.30          | -2.62                    | 18          | 18               | 23                   |
| Cggbp1     | CGG triplet repeat binding protein 1                    | 1.85          | -2.62                    | 28.1        | 28               | 19                   |
| Mcm6       | DNA helicase                                            | 2.53          | -2.67                    | 37          | 37               | 93                   |
| Adam19     | ADAM metalloproteinase domain 19                        | 3.61          | -2.69                    | 10.7        | 11               | 101                  |
| Armc1      | Armadillo repeat-containing protein 1                   | 5.05          | -2.86                    | 19          | 19               | 31                   |
| Rnasel     | ribonuclease L                                          | 2.98          | -3.08                    | 7.3         | 7                | 83                   |
| Hmgb2      | High mobility group protein B2                          | 4.51          | -3.08                    | 22          | 22               | 24                   |
| Rnf219     | RING finger protein 219                                 | 1.32          | -3.11                    | 3.9         | 4                | 80                   |
| Mcm5       | DNA helicase                                            | 3.79          | -3.14                    | 23          | 23               | 82                   |
| Parp4      | Poly [ADP-ribose] polymerase 4                          | 1.19          | -3.26                    | 3.6         | 2                | 189                  |
| Farp2      | FERM, RhoGEF and pleckstrin domain-containing protein 2 | 2.11          | -3.48                    | 5           | 5                | 121                  |
| Mcm4       | minichromosome maintenance complex component 4          | 2.19          | -3.50                    | 25.9        | 25               | 97                   |
| Actg2      | Actin, gamma-enteric smooth muscle                      | 1.29          | -3.89                    | 9           | 9                | 42                   |
| Anks1a     | Ankyrin repeat and SAM domain-containing protein 1A     | 3.55          | -4.11                    | 2.7         | 3                | 122                  |
