# Supplementary figures and images for: Quantitative proteomics and systems analysis of cultured H9C2 cardiomyoblasts during differentiation over time supports a ‘function follows form’ model of differentiation
Source: Royal Society of Chemistry journal article supplement (doi:10.1039/c8mo00036k), 2018-05-17

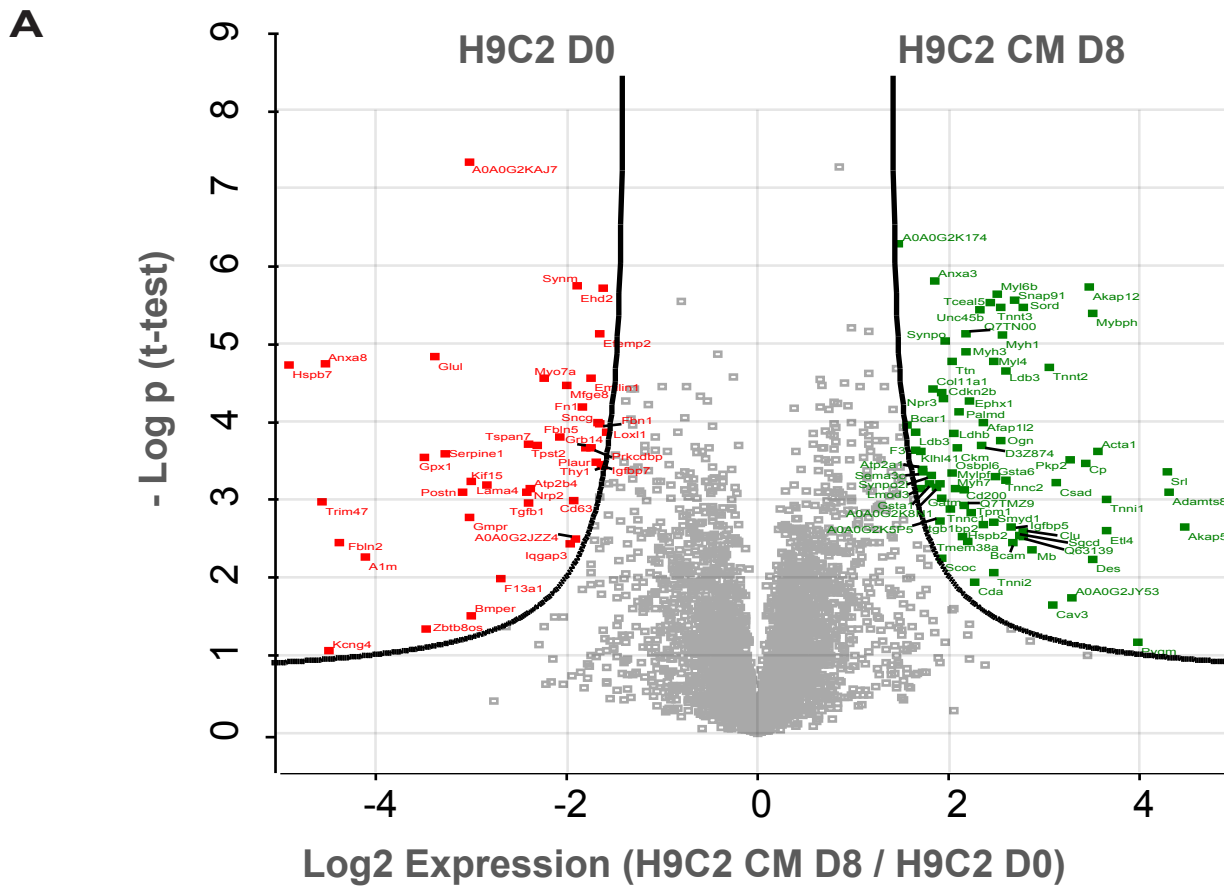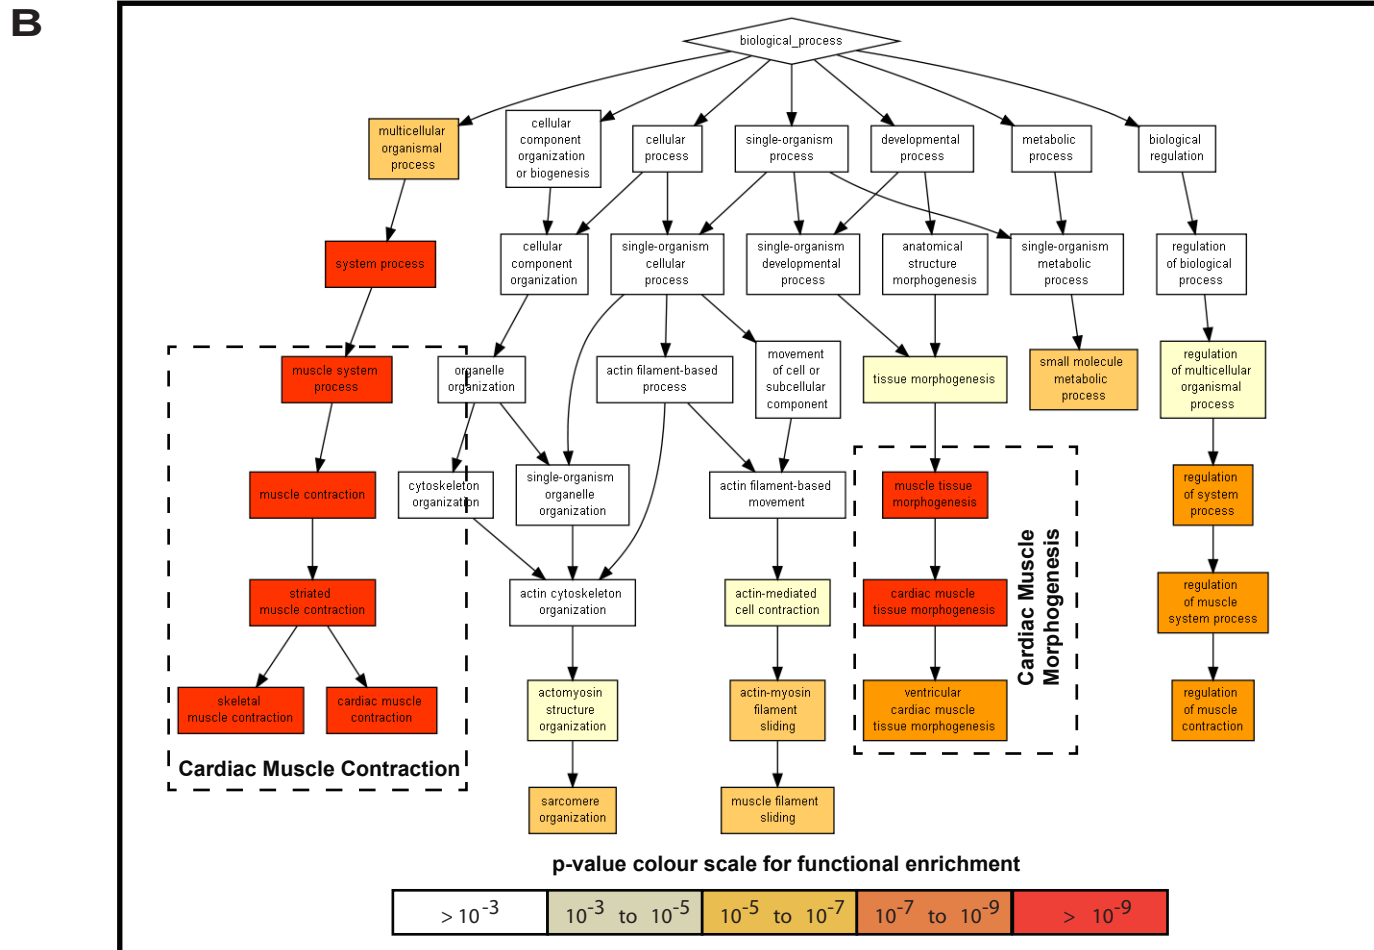

Supplement: c8mo00036k1.zip [file c8mo00036k1.zip]

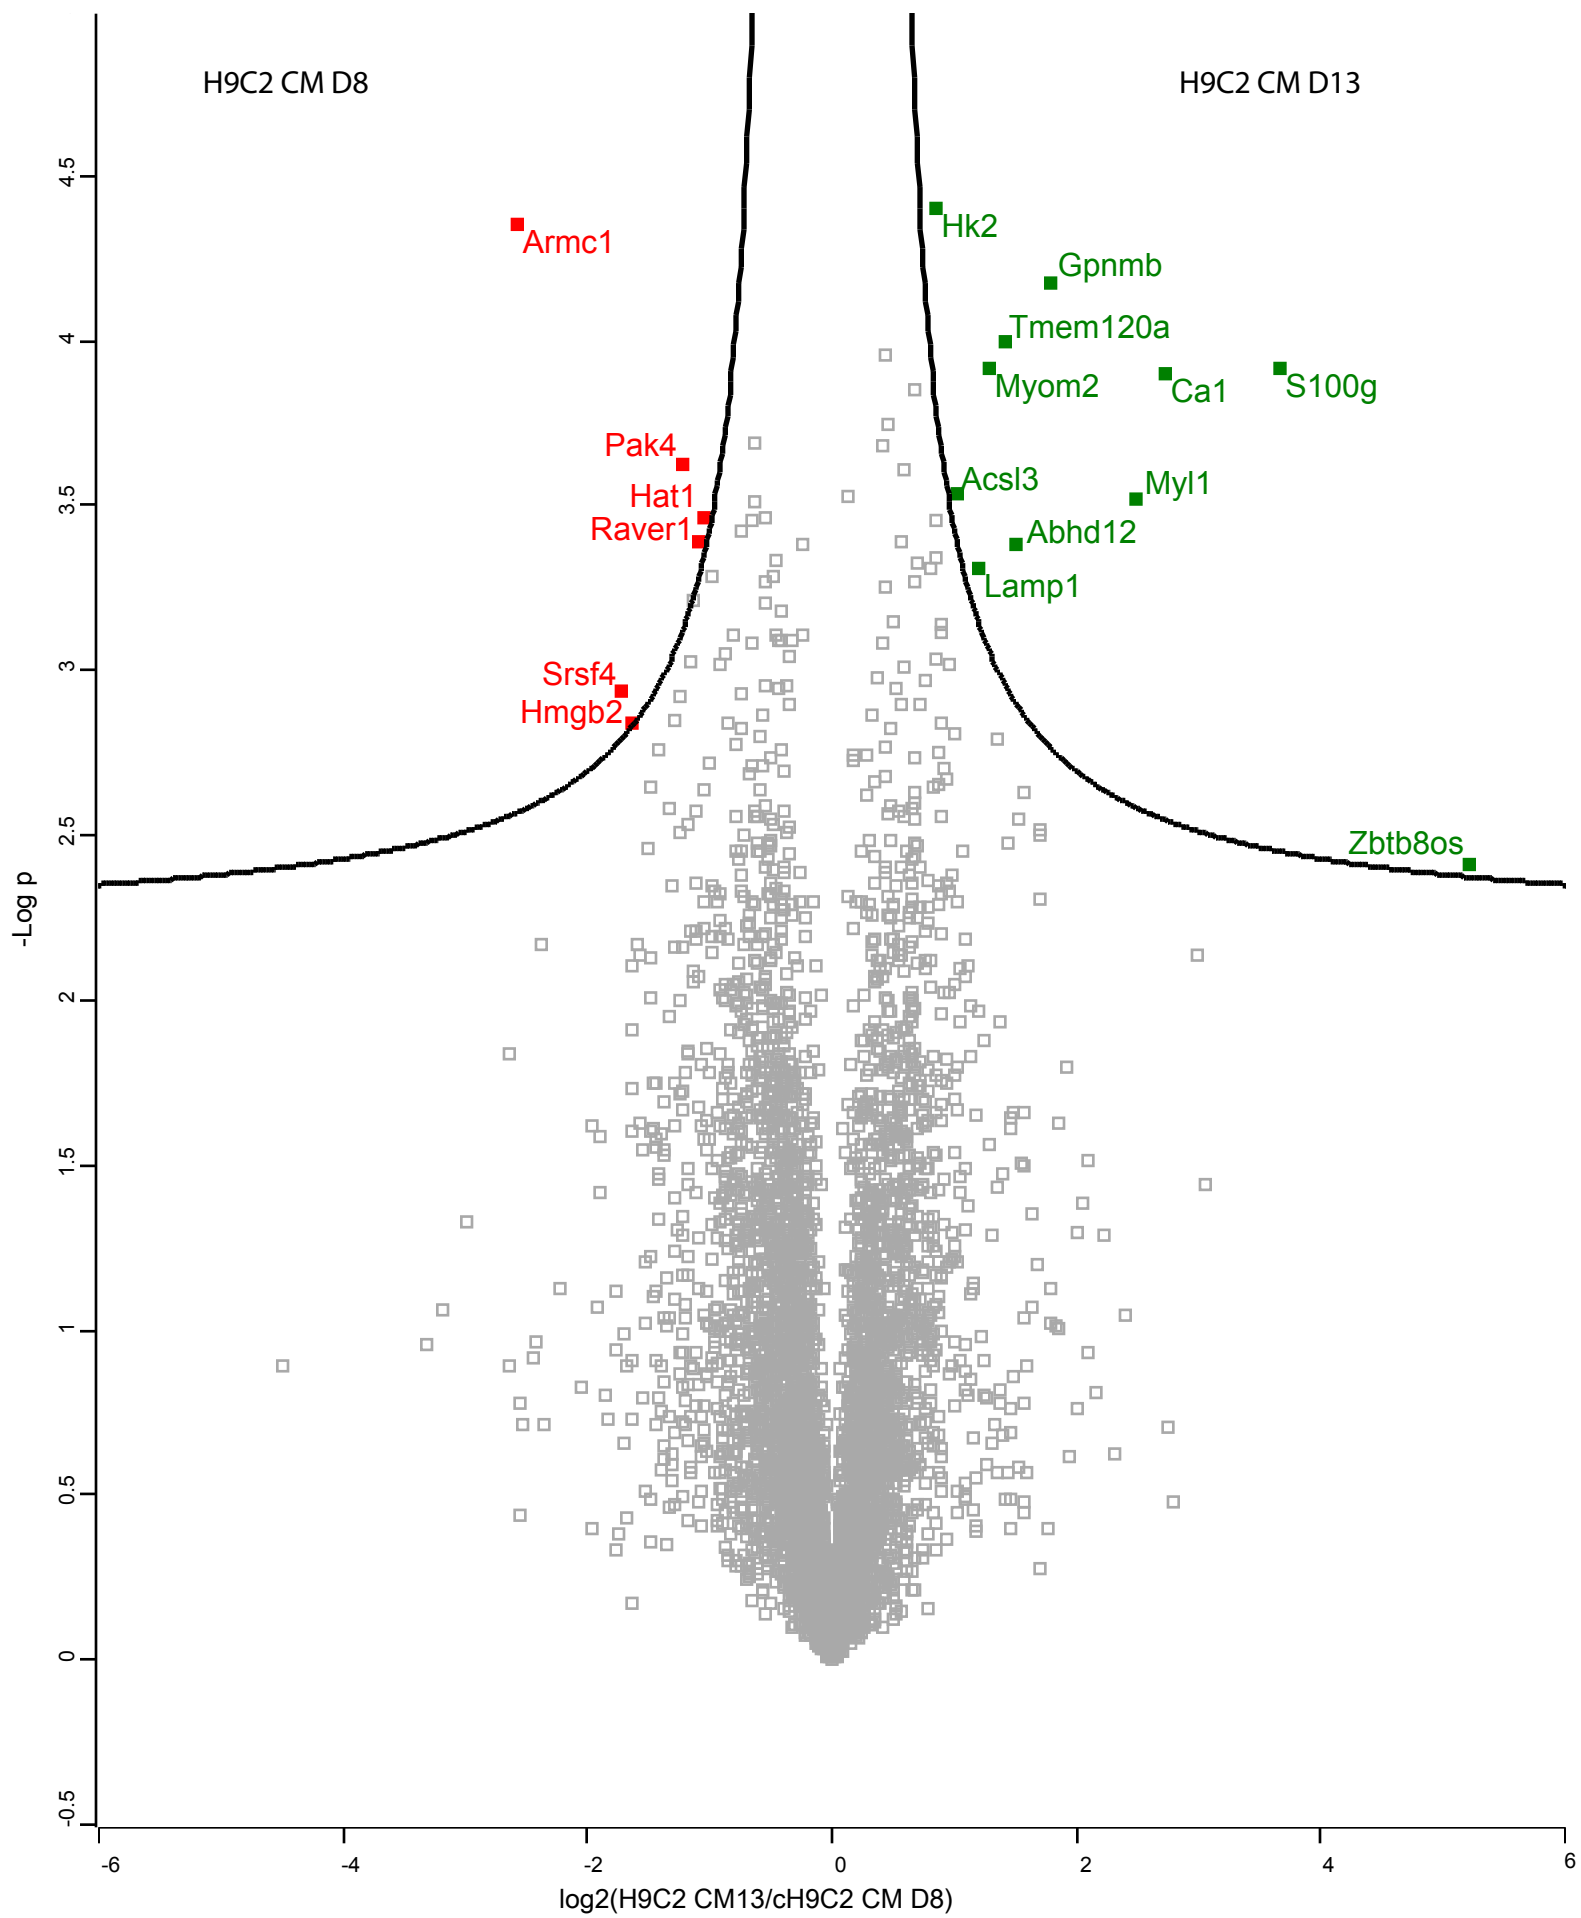

Supplement: c8mo00036k1.zip [file c8mo00036k1.zip]
